# Supplementary material
Source: publisher figshare collection journal article supplement (https://rs.figshare.com/ndownloader/files/25545440)
Supplement: Supplementary file 1 [file 25545440]

## Sheet: Sheet1
Table S2 from Cytoplasmic mRNA recapping has limited impact on proteome complexity
Bernice A. Agana, Vicki H. Wysocki and Daniel R. Schoenberg, Open Biology, DOI: 10.1098/rsob.200313
List of proteins identified in U2OS-K294A cells treated ±doxycycline
Tab 1 lists by accession number the proteins that were identified from tryptic peptides.
This listing includes the corresponding Uniprot name, sum of the PSM from triplicates, the individual PSM for each and percent coverage of each protein assigned
Tab 2 lists the individual peptides, PSM, protein group accession, identified modifications, molecular weight of each peptide and peptide identification scores
Tab 3 lists individual proteins by gene name, log2 fold change, average expression, p-value and adjusted p-value
Proteins that appear as red dots in Figure 1 are highlighted

## Sheet: Proteins
Accession	Description	ΣCoverage	Σ# Proteins	Σ# Unique Peptides	Σ# Peptides	Σ# PSMs	Coverage Induced1	# Peptides Induced1	# PSM Induced1	Coverage Induced2	# Peptides Induced2	# PSM Induced2	Coverage Induced3	# Peptides Induced3	# PSM Induced3	Coverage Uninduced1	# Peptides Uninduced1	# PSM Uninduced1	Coverage Uninduced2	# Peptides Uninduced2	# PSM Uninduced2	Coverage Uninduced3	# Peptides Uninduced3	# PSM Uninduced3
P62937	Peptidyl-prolyl cis-trans isomerase A OS=Homo sapiens GN=PPIA PE=1 SV=2 - [PPIA_HUMAN]	100	3	27	31	736	98.18	26	118	98.18	25	113	98.18	26	132	100	27	140	98.18	27	123	100	26	110
P04732	Metallothionein-1E OS=Homo sapiens GN=MT1E PE=1 SV=1 - [MT1E_HUMAN]	100	5	6	10	197	91.8	6	30	100	7	26	91.8	6	50	100	9	32	91.8	8	26	100	8	33
Q9C005	Protein dpy-30 homolog OS=Homo sapiens GN=DPY30 PE=1 SV=1 - [DPY30_HUMAN]	100	1	7	7	100	76.77	4	12	88.89	6	14	90.91	6	19	100	7	21	90.91	6	17	90.91	6	17
P80297	Metallothionein-1X OS=Homo sapiens GN=MT1X PE=1 SV=1 - [MT1X_HUMAN]	100	2	3	8	198	91.8	7	19	100	8	21	91.8	7	93	100	8	22	91.8	6	18	100	8	25
P02795	Metallothionein-2 OS=Homo sapiens GN=MT2A PE=1 SV=1 - [MT2_HUMAN]	100	2	7	12	381	91.8	11	45	100	10	62	91.8	10	126	100	11	53	91.8	9	45	100	10	50
P63220	40S ribosomal protein S21 OS=Homo sapiens GN=RPS21 PE=1 SV=1 - [RS21_HUMAN]	100	1	18	18	245	78.31	15	37	78.31	15	44	100	17	42	100	17	41	93.98	15	39	100	16	42
P06733	Alpha-enolase OS=Homo sapiens GN=ENO1 PE=1 SV=2 - [ENOA_HUMAN]	98.85	1	74	82	2084	96.31	70	388	98.85	71	293	96.31	73	340	98.85	74	422	96.31	70	351	96.31	67	290
P07355	Annexin A2 OS=Homo sapiens GN=ANXA2 PE=1 SV=2 - [ANXA2_HUMAN]	96.46	2	57	57	748	92.33	49	124	92.33	45	119	90.56	48	133	93.81	51	129	93.81	51	125	92.33	47	118
P04075	Fructose-bisphosphate aldolase A OS=Homo sapiens GN=ALDOA PE=1 SV=2 - [ALDOA_HUMAN]	96.43	1	37	45	1328	80.49	38	229	88.19	35	222	96.43	37	230	88.19	37	241	88.19	36	192	87.64	36	214
P18077	60S ribosomal protein L35a OS=Homo sapiens GN=RPL35A PE=1 SV=2 - [RL35A_HUMAN]	96.36	1	22	22	201	88.18	18	36	75.45	16	32	96.36	17	33	88.18	17	33	86.36	15	39	96.36	16	28
P04083	Annexin A1 OS=Homo sapiens GN=ANXA1 PE=1 SV=2 - [ANXA1_HUMAN]	96.24	1	54	54	611	88.73	43	92	93.35	42	88	90.46	48	110	91.62	49	104	89.6	47	114	94.8	46	103
P04792	Heat shock protein beta-1 OS=Homo sapiens GN=HSPB1 PE=1 SV=2 - [HSPB1_HUMAN]	96.1	1	23	23	576	77.56	19	94	96.1	21	99	77.56	20	102	96.1	22	102	96.1	20	83	96.1	20	96
P22392	Nucleoside diphosphate kinase B OS=Homo sapiens GN=NME2 PE=1 SV=1 - [NDKB_HUMAN]	96.05	1	7	25	362	90.13	20	62	83.55	17	46	90.13	23	62	96.05	24	75	90.13	21	56	90.13	21	61
P60709	Actin, cytoplasmic 1 OS=Homo sapiens GN=ACTB PE=1 SV=1 - [ACTB_HUMAN]	95.73	1	2	50	1318	88	43	217	79.2	40	187	88	45	247	95.73	45	246	91.47	40	196	85.33	41	225
P63261	Actin, cytoplasmic 2 OS=Homo sapiens GN=ACTG1 PE=1 SV=1 - [ACTG_HUMAN]	95.73	1	2	50	1313	88	43	215	79.2	39	185	88	45	253	95.73	45	245	91.47	40	192	85.33	41	223
P61513	60S ribosomal protein L37a OS=Homo sapiens GN=RPL37A PE=1 SV=2 - [RL37A_HUMAN]	95.65	2	22	22	478	92.39	17	71	86.96	18	86	92.39	18	67	94.57	17	64	93.48	17	94	93.48	19	96
P62857	40S ribosomal protein S28 OS=Homo sapiens GN=RPS28 PE=1 SV=1 - [RS28_HUMAN]	95.65	1	15	15	166	95.65	11	25	85.51	9	21	95.65	12	25	95.65	11	47	95.65	11	27	95.65	10	21
P39019	40S ribosomal protein S19 OS=Homo sapiens GN=RPS19 PE=1 SV=2 - [RS19_HUMAN]	95.17	1	29	29	356	86.9	25	63	84.14	23	53	82.07	22	52	86.21	23	63	77.93	22	68	82.07	22	57
P27635	60S ribosomal protein L10 OS=Homo sapiens GN=RPL10 PE=1 SV=4 - [RL10_HUMAN]	94.86	1	16	42	498	87.38	33	81	89.72	35	80	92.99	33	79	89.25	36	94	88.79	32	83	93.93	35	81
Q9H299	SH3 domain-binding glutamic acid-rich-like protein 3 OS=Homo sapiens GN=SH3BGRL3 PE=1 SV=1 - [SH3L3_HUMAN]	94.62	1	12	12	130	94.62	12	21	94.62	10	17	94.62	11	28	94.62	11	23	94.62	10	22	94.62	9	19
P62424	60S ribosomal protein L7a OS=Homo sapiens GN=RPL7A PE=1 SV=2 - [RL7A_HUMAN]	94.36	3	50	50	617	83.83	38	113	81.2	32	86	83.83	36	95	90.23	41	123	91.73	43	110	81.58	34	90
P35232	Prohibitin OS=Homo sapiens GN=PHB PE=1 SV=1 - [PHB_HUMAN]	94.12	1	29	29	359	82.72	22	58	84.19	18	55	90.81	26	74	94.12	23	62	90.81	21	58	94.12	21	52
P37802	Transgelin-2 OS=Homo sapiens GN=TAGLN2 PE=1 SV=3 - [TAGL2_HUMAN]	93.97	2	31	31	321	72.86	25	53	72.86	26	47	80.9	25	62	92.46	27	67	71.36	22	44	83.92	25	48
P61604	10 kDa heat shock protein, mitochondrial OS=Homo sapiens GN=HSPE1 PE=1 SV=2 - [CH10_HUMAN]	93.14	1	20	20	294	79.41	13	53	57.84	13	43	81.37	15	45	93.14	19	56	80.39	16	44	93.14	16	53
P00558	Phosphoglycerate kinase 1 OS=Homo sapiens GN=PGK1 PE=1 SV=3 - [PGK1_HUMAN]	93.05	2	43	43	510	78.18	33	87	80.58	32	78	89.69	38	96	93.05	38	90	90.65	35	83	85.85	31	76
P61247	40S ribosomal protein S3a OS=Homo sapiens GN=RPS3A PE=1 SV=2 - [RS3A_HUMAN]	92.42	1	54	54	559	87.5	42	92	84.85	45	80	92.42	46	92	87.5	46	95	84.85	42	97	84.85	41	103
P62888	60S ribosomal protein L30 OS=Homo sapiens GN=RPL30 PE=1 SV=2 - [RL30_HUMAN]	92.17	1	23	23	329	90.43	21	60	84.35	19	48	92.17	22	62	90.43	21	61	90.43	20	49	92.17	20	49
P14618	Pyruvate kinase PKM OS=Homo sapiens GN=PKM PE=1 SV=4 - [KPYM_HUMAN]	91.9	2	88	88	1536	89.45	70	244	90.58	71	275	90.58	72	264	91.9	75	264	90.58	73	260	90.58	66	229
P08670	Vimentin OS=Homo sapiens GN=VIM PE=1 SV=4 - [VIME_HUMAN]	91.85	4	81	87	1764	87.77	69	266	87.34	66	285	90.34	72	294	90.34	79	361	90.13	72	279	88.63	69	279
P08708	40S ribosomal protein S17 OS=Homo sapiens GN=RPS17 PE=1 SV=2 - [RS17_HUMAN]	91.85	1	25	25	334	91.85	20	50	86.67	18	51	91.85	20	58	89.63	22	73	83.7	16	46	89.63	20	56
P23528	Cofilin-1 OS=Homo sapiens GN=CFL1 PE=1 SV=3 - [COF1_HUMAN]	91.57	1	13	25	532	91.57	23	78	91.57	22	105	91.57	21	80	84.94	19	90	90.96	20	91	84.94	20	88
P07919	Cytochrome b-c1 complex subunit 6, mitochondrial OS=Homo sapiens GN=UQCRH PE=1 SV=2 - [QCR6_HUMAN]	91.21	1	11	11	81	62.64	7	14	62.64	7	12	50.55	6	11	91.21	10	20	50.55	5	12	50.55	6	12
P62280	40S ribosomal protein S11 OS=Homo sapiens GN=RPS11 PE=1 SV=3 - [RS11_HUMAN]	91.14	1	31	31	365	90.51	27	65	83.54	26	61	86.71	26	65	84.81	26	60	81.01	25	55	82.91	26	59
P61254	60S ribosomal protein L26 OS=Homo sapiens GN=RPL26 PE=1 SV=1 - [RL26_HUMAN]	91.03	2	8	32	455	77.24	18	78	86.9	24	80	71.72	19	60	88.97	28	78	80.69	21	81	84.83	25	78
Q99623	Prohibitin-2 OS=Homo sapiens GN=PHB2 PE=1 SV=2 - [PHB2_HUMAN]	90.97	1	33	33	269	74.92	22	38	74.92	21	39	89.97	28	50	84.28	30	63	80.27	24	43	74.92	21	36
P23396	40S ribosomal protein S3 OS=Homo sapiens GN=RPS3 PE=1 SV=2 - [RS3_HUMAN]	90.95	1	33	33	310	86.42	27	53	85.19	24	45	90.53	28	57	90.95	25	54	86.42	26	58	80.66	23	43
O15212	Prefoldin subunit 6 OS=Homo sapiens GN=PFDN6 PE=1 SV=1 - [PFD6_HUMAN]	90.7	1	11	11	69	39.53	6	16	55.04	6	8	47.29	5	10	60.47	6	9	65.12	9	14	58.91	7	12
P55769	NHP2-like protein 1 OS=Homo sapiens GN=NHP2L1 PE=1 SV=3 - [NH2L1_HUMAN]	90.63	1	13	13	85	58.59	7	10	62.5	9	14	57.03	9	11	57.03	11	21	85.16	9	14	57.03	11	15
P62249	40S ribosomal protein S16 OS=Homo sapiens GN=RPS16 PE=1 SV=2 - [RS16_HUMAN]	89.73	1	23	23	248	73.29	16	39	70.55	17	37	67.81	15	43	84.25	18	49	74.66	16	35	84.25	19	45
P49207	60S ribosomal protein L34 OS=Homo sapiens GN=RPL34 PE=1 SV=3 - [RL34_HUMAN]	88.89	1	29	29	236	75.21	21	43	71.79	18	37	69.23	19	43	76.92	22	42	71.79	19	33	69.23	19	38
P49773	Histidine triad nucleotide-binding protein 1 OS=Homo sapiens GN=HINT1 PE=1 SV=2 - [HINT1_HUMAN]	88.89	1	13	13	174	88.89	11	27	88.89	10	25	88.89	11	29	88.89	12	35	88.89	11	33	88.89	11	25
Q9H3K6	BolA-like protein 2 OS=Homo sapiens GN=BOLA2 PE=1 SV=1 - [BOLA2_HUMAN]	88.37	1	8	8	56	75.58	6	10	75.58	5	8	88.37	7	11	86.05	6	7	75.58	5	9	75.58	5	11
P60866	40S ribosomal protein S20 OS=Homo sapiens GN=RPS20 PE=1 SV=1 - [RS20_HUMAN]	88.24	1	19	19	258	85.71	18	52	88.24	17	32	84.87	16	47	88.24	17	45	87.39	18	43	88.24	18	39
P39023	60S ribosomal protein L3 OS=Homo sapiens GN=RPL3 PE=1 SV=2 - [RL3_HUMAN]	88.09	2	60	60	547	64.52	41	101	65.01	39	82	72.7	44	99	71.46	46	85	60.05	39	101	57.82	38	79
Q02543	60S ribosomal protein L18a OS=Homo sapiens GN=RPL18A PE=1 SV=2 - [RL18A_HUMAN]	88.07	1	33	33	393	79.55	25	74	71.59	24	68	79.55	24	68	79.55	26	62	75	25	61	85.8	22	60
O60220	Mitochondrial import inner membrane translocase subunit Tim8 A OS=Homo sapiens GN=TIMM8A PE=1 SV=1 - [TIM8A_HUMAN]	87.63	1	5	5	65	87.63	5	11	76.29	4	9	76.29	4	11	76.29	4	15	76.29	4	8	76.29	4	11
P07437	Tubulin beta chain OS=Homo sapiens GN=TUBB PE=1 SV=2 - [TBB5_HUMAN]	87.61	3	9	45	984	70.95	36	162	70.95	36	144	85.36	43	181	72.97	38	180	78.83	41	171	72.97	34	146
P35268	60S ribosomal protein L22 OS=Homo sapiens GN=RPL22 PE=1 SV=2 - [RL22_HUMAN]	87.5	1	18	23	331	83.59	16	56	84.38	16	49	86.72	20	62	84.38	18	62	80.47	17	52	80.47	17	50
Q9UBI6	Guanine nucleotide-binding protein G(I)/G(S)/G(O) subunit gamma-12 OS=Homo sapiens GN=GNG12 PE=1 SV=3 - [GBG12_HUMAN]	87.5	1	7	7	68	79.17	4	9	80.56	5	14	87.5	6	14	77.78	6	9	79.17	4	13	80.56	5	9
P68371	Tubulin beta-4B chain OS=Homo sapiens GN=TUBB4B PE=1 SV=1 - [TBB4B_HUMAN]	87.42	4	3	45	937	70.79	35	161	70.79	34	136	85.17	42	172	72.81	38	173	78.65	40	161	72.81	33	134
Q01469	Fatty acid-binding protein, epidermal OS=Homo sapiens GN=FABP5 PE=1 SV=3 - [FABP5_HUMAN]	87.41	2	16	16	191	65.93	13	36	85.93	15	30	85.93	14	34	87.41	15	34	85.93	13	30	85.93	13	27
P62805	Histone H4 OS=Homo sapiens GN=HIST1H4A PE=1 SV=2 - [H4_HUMAN]	87.38	1	27	27	3012	76.7	26	450	80.58	26	521	76.7	26	304	66.02	24	511	69.9	25	619	87.38	27	607
P31949	Protein S100-A11 OS=Homo sapiens GN=S100A11 PE=1 SV=2 - [S10AB_HUMAN]	86.67	1	12	12	66	85.71	9	9	56.19	6	7	85.71	10	13	86.67	11	16	86.67	10	13	56.19	6	8
P49458	Signal recognition particle 9 kDa protein OS=Homo sapiens GN=SRP9 PE=1 SV=2 - [SRP09_HUMAN]	86.05	1	12	12	97	63.95	9	17	53.49	7	14	55.81	6	17	77.91	10	14	63.95	9	17	63.95	8	18
P0C0S5	Histone H2A.Z OS=Homo sapiens GN=H2AFZ PE=1 SV=2 - [H2AZ_HUMAN]	85.94	1	1	20	253	80.47	16	50	74.22	14	33	76.56	14	43	81.25	18	41	74.22	15	49	78.91	16	37
Q71UI9	Histone H2A.V OS=Homo sapiens GN=H2AFV PE=1 SV=3 - [H2AV_HUMAN]	85.94	1	1	20	255	80.47	16	50	78.13	15	34	76.56	14	43	81.25	18	41	74.22	15	49	78.91	16	38
Q96KK5	Histone H2A type 1-H OS=Homo sapiens GN=HIST1H2AH PE=1 SV=3 - [H2A1H_HUMAN]	85.94	4	0	26	622	84.38	21	90	85.94	22	85	84.38	20	182	84.38	25	96	81.25	20	88	81.25	21	81
P26373	60S ribosomal protein L13 OS=Homo sapiens GN=RPL13 PE=1 SV=4 - [RL13_HUMAN]	85.31	1	37	37	337	64.45	24	56	58.77	23	50	69.67	26	56	72.51	27	64	73.93	24	50	63.03	24	61
P60174	Triosephosphate isomerase OS=Homo sapiens GN=TPI1 PE=1 SV=3 - [TPIS_HUMAN]	85.31	1	49	49	870	85.31	47	140	85.31	44	134	85.31	44	163	85.31	46	158	85.31	46	147	85.31	45	128
P05387	60S acidic ribosomal protein P2 OS=Homo sapiens GN=RPLP2 PE=1 SV=1 - [RLA2_HUMAN]	85.22	1	10	11	94	35.65	6	12	53.91	6	13	85.22	9	18	78.26	9	16	67.83	8	19	67.83	8	16
P14854	Cytochrome c oxidase subunit 6B1 OS=Homo sapiens GN=COX6B1 PE=1 SV=2 - [CX6B1_HUMAN]	84.88	1	8	8	119	67.44	7	20	67.44	7	17	67.44	7	22	67.44	7	18	84.88	7	23	67.44	6	19
Q93077	Histone H2A type 1-C OS=Homo sapiens GN=HIST1H2AC PE=1 SV=3 - [H2A1C_HUMAN]	84.62	2	3	25	555	83.08	19	79	84.62	21	76	83.08	18	169	83.08	24	84	80	18	72	80	20	75
Q6FI13	Histone H2A type 2-A OS=Homo sapiens GN=HIST2H2AA3 PE=1 SV=3 - [H2A2A_HUMAN]	84.62	3	5	26	617	83.08	21	88	84.62	22	82	83.08	21	189	83.08	25	95	80	20	84	80	21	79
P20671	Histone H2A type 1-D OS=Homo sapiens GN=HIST1H2AD PE=1 SV=2 - [H2A1D_HUMAN]	84.62	2	3	25	489	83.08	21	85	84.62	21	83	83.08	20	79	83.08	24	88	80	19	81	80	20	73
P30405	Peptidyl-prolyl cis-trans isomerase F, mitochondrial OS=Homo sapiens GN=PPIF PE=1 SV=1 - [PPIF_HUMAN]	84.54	1	15	17	142	54.59	11	24	60.39	9	19	59.9	12	19	84.54	15	37	67.15	14	23	63.29	13	20
P05787	Keratin, type II cytoskeletal 8 OS=Homo sapiens GN=KRT8 PE=1 SV=7 - [K2C8_HUMAN]	84.47	14	46	52	557	61.28	38	97	53.42	32	83	78.05	45	113	71.84	43	94	65.01	41	95	54.45	34	75
P04350	Tubulin beta-4A chain OS=Homo sapiens GN=TUBB4A PE=1 SV=2 - [TBB4A_HUMAN]	84.01	1	2	37	739	65.32	30	127	65.32	29	107	77.7	34	137	67.57	32	136	73.2	33	130	67.34	28	102
P46778	60S ribosomal protein L21 OS=Homo sapiens GN=RPL21 PE=1 SV=2 - [RL21_HUMAN]	83.75	2	21	21	250	83.75	18	48	77.5	16	34	83.75	18	45	70	18	46	70	14	33	77.5	19	44
P54819	Adenylate kinase 2, mitochondrial OS=Homo sapiens GN=AK2 PE=1 SV=2 - [KAD2_HUMAN]	83.68	1	21	21	216	72.38	12	29	68.2	13	30	81.59	15	38	76.99	18	42	73.64	15	44	73.22	16	33
P30050	60S ribosomal protein L12 OS=Homo sapiens GN=RPL12 PE=1 SV=1 - [RL12_HUMAN]	83.64	2	20	20	237	73.94	14	39	73.94	13	33	64.24	15	47	83.64	17	47	73.94	13	36	73.94	15	35
Q9UNX3	60S ribosomal protein L26-like 1 OS=Homo sapiens GN=RPL26L1 PE=1 SV=1 - [RL26L_HUMAN]	83.45	2	2	26	383	76.55	17	69	82.76	20	69	77.93	19	56	81.38	23	67	71.72	17	57	81.38	21	65
P10809	60 kDa heat shock protein, mitochondrial OS=Homo sapiens GN=HSPD1 PE=1 SV=2 - [CH60_HUMAN]	83.42	1	74	74	1747	76.79	67	303	68.59	60	260	76.96	67	316	74.69	66	300	76.79	62	291	82.9	64	277
P32969	60S ribosomal protein L9 OS=Homo sapiens GN=RPL9 PE=1 SV=1 - [RL9_HUMAN]	83.33	1	25	25	302	66.67	20	55	61.46	18	49	75.52	19	54	63.54	21	52	68.75	21	47	61.98	18	45
P62701	40S ribosomal protein S4, X isoform OS=Homo sapiens GN=RPS4X PE=1 SV=2 - [RS4X_HUMAN]	83.27	3	46	46	503	69.2	33	88	71.1	35	76	74.52	36	90	76.81	38	93	70.72	31	78	74.9	36	78
P68431	Histone H3.1 OS=Homo sapiens GN=HIST1H3A PE=1 SV=2 - [H31_HUMAN]	82.35	3	4	29	855	82.35	24	183	72.06	21	124	82.35	23	143	82.35	25	126	82.35	25	144	82.35	24	135
P84243	Histone H3.3 OS=Homo sapiens GN=H3F3A PE=1 SV=2 - [H33_HUMAN]	82.35	2	4	26	765	72.06	23	163	72.06	21	122	72.06	23	119	72.79	21	116	82.35	24	123	72.79	23	122
Q71DI3	Histone H3.2 OS=Homo sapiens GN=HIST2H3A PE=1 SV=3 - [H32_HUMAN]	82.35	3	4	29	912	82.35	25	190	72.06	21	130	82.35	25	153	82.35	25	134	82.35	25	166	82.35	24	139
P18124	60S ribosomal protein L7 OS=Homo sapiens GN=RPL7 PE=1 SV=1 - [RL7_HUMAN]	82.26	2	31	31	209	70.97	22	35	50	14	26	64.52	21	38	68.55	22	42	62.1	21	40	59.27	17	28
Q9BVA1	Tubulin beta-2B chain OS=Homo sapiens GN=TUBB2B PE=1 SV=1 - [TBB2B_HUMAN]	82.25	2	1	33	706	56.18	24	114	48.99	23	99	69.44	29	132	61.57	27	128	62.92	30	127	56.4	23	106
P09382	Galectin-1 OS=Homo sapiens GN=LGALS1 PE=1 SV=2 - [LEG1_HUMAN]	82.22	1	13	13	275	76.3	11	43	73.33	10	40	82.22	13	52	82.22	12	48	82.22	12	44	82.22	11	48
P62277	40S ribosomal protein S13 OS=Homo sapiens GN=RPS13 PE=1 SV=2 - [RS13_HUMAN]	82.12	1	18	18	128	64.24	11	22	48.34	11	19	60.26	12	22	70.2	14	25	64.24	13	22	48.34	11	18
Q99439	Calponin-2 OS=Homo sapiens GN=CNN2 PE=1 SV=4 - [CNN2_HUMAN]	81.88	1	20	20	201	81.23	16	36	69.26	15	31	81.88	16	38	81.88	19	35	81.88	18	30	69.26	14	31
P78371	T-complex protein 1 subunit beta OS=Homo sapiens GN=CCT2 PE=1 SV=4 - [TCPB_HUMAN]	81.87	1	50	50	427	65.98	33	65	68.79	33	69	71.59	36	78	81.31	46	90	73.46	35	70	67.29	31	55
P62753	40S ribosomal protein S6 OS=Homo sapiens GN=RPS6 PE=1 SV=1 - [RS6_HUMAN]	81.53	1	33	33	419	74.3	25	72	71.49	25	69	73.49	24	69	77.91	25	73	74.3	26	67	77.91	26	69
P63104	14-3-3 protein zeta/delta OS=Homo sapiens GN=YWHAZ PE=1 SV=1 - [1433Z_HUMAN]	81.22	1	22	30	449	64.49	21	64	64.49	21	91	81.22	26	75	64.49	24	77	64.49	21	64	64.49	22	78
Q9HB71	Calcyclin-binding protein OS=Homo sapiens GN=CACYBP PE=1 SV=2 - [CYBP_HUMAN]	81.14	1	22	22	187	61.4	15	29	61.4	15	25	61.84	18	34	76.75	21	36	75	20	40	70.61	15	23
Q04837	Single-stranded DNA-binding protein, mitochondrial OS=Homo sapiens GN=SSBP1 PE=1 SV=1 - [SSBP_HUMAN]	81.08	1	11	11	128	81.08	11	21	78.38	9	19	78.38	10	22	78.38	9	22	78.38	10	27	78.38	10	17
Q06830	Peroxiredoxin-1 OS=Homo sapiens GN=PRDX1 PE=1 SV=1 - [PRDX1_HUMAN]	80.9	1	23	25	378	68.84	20	58	80.9	19	54	67.84	19	59	69.85	22	72	69.85	21	77	69.85	21	58
P62899	60S ribosomal protein L31 OS=Homo sapiens GN=RPL31 PE=1 SV=1 - [RL31_HUMAN]	80.8	1	25	25	236	69.6	16	33	70.4	18	37	78.4	19	50	80.8	17	35	80	20	45	75.2	16	36
P67936	Tropomyosin alpha-4 chain OS=Homo sapiens GN=TPM4 PE=1 SV=3 - [TPM4_HUMAN]	80.65	1	16	36	389	70.56	26	56	75	26	52	77.02	25	63	68.95	31	75	78.23	27	66	77.42	28	77
P22626	Heterogeneous nuclear ribonucleoproteins A2/B1 OS=Homo sapiens GN=HNRNPA2B1 PE=1 SV=2 - [ROA2_HUMAN]	80.45	1	35	37	548	75.92	31	95	78.19	32	85	75.07	29	84	75.07	31	96	75.92	29	80	72.8	29	108
P18669	Phosphoglycerate mutase 1 OS=Homo sapiens GN=PGAM1 PE=1 SV=2 - [PGAM1_HUMAN]	80.31	3	34	34	506	78.74	27	90	78.74	24	64	77.56	25	76	80.31	30	88	77.56	25	109	77.56	25	79
P25398	40S ribosomal protein S12 OS=Homo sapiens GN=RPS12 PE=1 SV=3 - [RS12_HUMAN]	80.3	1	15	15	137	80.3	13	21	77.27	12	19	75	13	22	75	12	30	77.27	14	22	75	13	23
P15531	Nucleoside diphosphate kinase A OS=Homo sapiens GN=NME1 PE=1 SV=1 - [NDKA_HUMAN]	80.26	1	6	17	275	59.21	13	46	59.21	13	42	53.29	14	48	70.39	14	51	64.47	14	43	50	12	45
P55072	Transitional endoplasmic reticulum ATPase OS=Homo sapiens GN=VCP PE=1 SV=4 - [TERA_HUMAN]	80.15	2	86	86	885	70.1	60	144	66.5	61	124	76.55	69	157	73.82	74	187	68.98	64	147	63.28	55	126
Q9Y281	Cofilin-2 OS=Homo sapiens GN=CFL2 PE=1 SV=1 - [COF2_HUMAN]	80.12	1	10	22	273	74.7	19	45	70.48	16	35	74.1	18	51	72.89	18	49	69.28	14	46	72.89	17	47
P24666	Low molecular weight phosphotyrosine protein phosphatase OS=Homo sapiens GN=ACP1 PE=1 SV=3 - [PPAC_HUMAN]	79.75	1	12	12	106	79.75	9	15	79.75	9	15	79.75	10	17	79.75	12	24	79.75	12	22	79.75	9	13
P83731	60S ribosomal protein L24 OS=Homo sapiens GN=RPL24 PE=1 SV=1 - [RL24_HUMAN]	79.62	1	25	25	304	66.88	16	48	71.97	20	50	70.7	16	48	79.62	22	55	67.52	18	53	71.97	19	50
O95816	BAG family molecular chaperone regulator 2 OS=Homo sapiens GN=BAG2 PE=1 SV=1 - [BAG2_HUMAN]	79.62	1	14	14	129	64.45	11	22	58.77	10	18	79.15	12	26	79.62	14	25	64.45	11	18	72.04	12	20
P46779	60S ribosomal protein L28 OS=Homo sapiens GN=RPL28 PE=1 SV=3 - [RL28_HUMAN]	79.56	1	26	26	303	75.18	19	47	75.18	21	45	78.83	22	57	75.91	22	52	75.18	20	50	75.91	21	52
P31947	14-3-3 protein sigma OS=Homo sapiens GN=SFN PE=1 SV=1 - [1433S_HUMAN]	79.44	1	24	31	371	45.97	18	60	46.77	14	80	71.77	24	71	56.45	18	57	59.68	17	50	45.97	16	53
P62917	60S ribosomal protein L8 OS=Homo sapiens GN=RPL8 PE=1 SV=2 - [RL8_HUMAN]	79.38	1	37	37	401	67.7	26	64	61.48	24	51	56.81	22	65	65.76	31	69	59.53	25	70	62.65	25	82
P68363	Tubulin alpha-1B chain OS=Homo sapiens GN=TUBA1B PE=1 SV=1 - [TBA1B_HUMAN]	79.38	3	1	42	606	79.38	36	109	65.85	33	91	65.85	38	110	74.94	38	108	68.51	35	100	61.42	32	88
P18621	60S ribosomal protein L17 OS=Homo sapiens GN=RPL17 PE=1 SV=3 - [RL17_HUMAN]	79.35	1	25	25	266	75.54	22	46	61.96	18	37	79.35	24	53	75.54	21	43	75.54	22	43	75.54	21	44
P07737	Profilin-1 OS=Homo sapiens GN=PFN1 PE=1 SV=2 - [PROF1_HUMAN]	79.29	1	26	26	567	79.29	24	109	79.29	18	80	79.29	24	86	79.29	24	104	79.29	23	97	79.29	20	91
Q9BQE3	Tubulin alpha-1C chain OS=Homo sapiens GN=TUBA1C PE=1 SV=1 - [TBA1C_HUMAN]	79.29	3	4	40	558	79.29	35	100	72.16	32	88	72.16	38	109	74.83	37	99	68.82	34	83	67.71	32	79
P47914	60S ribosomal protein L29 OS=Homo sapiens GN=RPL29 PE=1 SV=2 - [RL29_HUMAN]	79.25	1	24	24	194	61.01	15	31	69.18	17	34	63.52	16	34	71.7	20	45	61.64	15	23	66.04	16	27
Q8IUE6	Histone H2A type 2-B OS=Homo sapiens GN=HIST2H2AB PE=1 SV=3 - [H2A2B_HUMAN]	79.23	2	2	20	450	74.62	15	62	56.15	16	60	74.62	14	153	74.62	18	58	69.23	14	57	74.62	17	60
P02545	Prelamin-A/C OS=Homo sapiens GN=LMNA PE=1 SV=1 - [LMNA_HUMAN]	78.77	1	72	74	713	61.6	49	101	65.21	52	114	65.36	56	125	70.78	63	131	67.62	57	124	65.96	54	118
P62273	40S ribosomal protein S29 OS=Homo sapiens GN=RPS29 PE=1 SV=2 - [RS29_HUMAN]	78.57	1	14	14	94	60.71	8	11	66.07	12	17	66.07	9	13	66.07	11	15	66.07	9	23	78.57	10	15
P21796	Voltage-dependent anion-selective channel protein 1 OS=Homo sapiens GN=VDAC1 PE=1 SV=2 - [VDAC1_HUMAN]	78.45	1	26	27	245	68.9	18	45	69.96	19	39	70.67	24	46	71.73	20	35	77.39	23	43	58.3	16	37
P62266	40S ribosomal protein S23 OS=Homo sapiens GN=RPS23 PE=1 SV=3 - [RS23_HUMAN]	78.32	1	22	22	222	71.33	15	29	78.32	17	37	71.33	18	40	78.32	19	49	71.33	18	37	74.13	14	30
Q02878	60S ribosomal protein L6 OS=Homo sapiens GN=RPL6 PE=1 SV=3 - [RL6_HUMAN]	78.13	1	30	30	347	56.25	20	62	52.43	19	53	61.11	20	50	72.22	25	64	62.15	23	65	53.13	19	53
P09211	Glutathione S-transferase P OS=Homo sapiens GN=GSTP1 PE=1 SV=2 - [GSTP1_HUMAN]	78.1	1	13	13	151	64.29	9	20	64.29	9	23	72.86	11	26	78.1	12	34	72.86	11	22	64.29	10	26
P48643	T-complex protein 1 subunit epsilon OS=Homo sapiens GN=CCT5 PE=1 SV=1 - [TCPE_HUMAN]	78	1	38	39	375	62.66	33	67	66.73	26	54	65.62	33	71	72.46	36	70	67.28	32	61	63.22	28	52
P63173	60S ribosomal protein L38 OS=Homo sapiens GN=RPL38 PE=1 SV=2 - [RL38_HUMAN]	77.14	1	7	7	115	65.71	6	19	65.71	6	20	65.71	6	23	77.14	7	21	65.71	6	17	65.71	6	15
Q13268	Dehydrogenase/reductase SDR family member 2, mitochondrial OS=Homo sapiens GN=DHRS2 PE=1 SV=4 - [DHRS2_HUMAN]	77.14	1	31	31	238	63.93	22	43	60.36	23	36	69.64	24	44	61.79	26	40	59.29	23	44	54.64	20	31
P84090	Enhancer of rudimentary homolog OS=Homo sapiens GN=ERH PE=1 SV=1 - [ERH_HUMAN]	76.92	1	9	9	102	47.12	6	14	47.12	7	18	47.12	6	13	76.92	8	20	47.12	7	15	47.12	7	22
Q9UI30	Multifunctional methyltransferase subunit TRM112-like protein OS=Homo sapiens GN=TRMT112 PE=1 SV=1 - [TR112_HUMAN]	76.8	1	9	9	97	76.8	6	16	76.8	7	12	76.8	7	13	76.8	8	24	76.8	8	13	76.8	7	19
P40926	Malate dehydrogenase, mitochondrial OS=Homo sapiens GN=MDH2 PE=1 SV=3 - [MDHM_HUMAN]	76.63	1	36	36	465	73.37	28	78	73.37	28	71	76.63	30	70	74.56	32	95	74.56	29	80	73.37	30	71
P46776	60S ribosomal protein L27a OS=Homo sapiens GN=RPL27A PE=1 SV=2 - [RL27A_HUMAN]	76.35	1	15	15	207	60.14	10	38	60.14	10	26	56.08	11	45	64.19	12	35	64.19	11	24	64.19	12	39
O00299	Chloride intracellular channel protein 1 OS=Homo sapiens GN=CLIC1 PE=1 SV=4 - [CLIC1_HUMAN]	76.35	1	25	25	221	63.07	18	35	75.93	17	32	76.35	22	39	73.44	23	50	76.35	21	33	70.54	16	32
Q9UMY4	Sorting nexin-12 OS=Homo sapiens GN=SNX12 PE=1 SV=3 - [SNX12_HUMAN]	76.16	1	8	8	31	35.47	4	4	30.23	4	5	36.63	5	6	59.3	6	7	40.12	5	6	24.42	3	3
Q01995	Transgelin OS=Homo sapiens GN=TAGLN PE=1 SV=4 - [TAGL_HUMAN]	76.12	1	14	14	131	73.63	12	23	68.66	10	19	54.23	8	23	66.67	12	27	68.66	10	22	68.66	9	17
O60361	Putative nucleoside diphosphate kinase OS=Homo sapiens GN=NME2P1 PE=5 SV=1 - [NDK8_HUMAN]	75.91	1	2	15	237	68.61	11	40	62.04	10	28	75.91	15	40	75.91	14	51	72.26	13	38	72.26	13	40
Q99426	Tubulin-folding cofactor B OS=Homo sapiens GN=TBCB PE=1 SV=2 - [TBCB_HUMAN]	75.82	1	19	19	205	75	17	42	65.16	12	25	67.21	16	36	68.85	15	30	70.9	16	37	68.03	13	35
Q15233	Non-POU domain-containing octamer-binding protein OS=Homo sapiens GN=NONO PE=1 SV=4 - [NONO_HUMAN]	75.8	1	45	47	507	63.69	31	79	60.3	29	73	63.91	31	84	71.76	41	99	61.15	32	79	66.45	34	93
P15880	40S ribosomal protein S2 OS=Homo sapiens GN=RPS2 PE=1 SV=2 - [RS2_HUMAN]	75.77	1	36	36	341	64.85	31	53	74.74	31	56	75.77	33	64	64.85	29	51	63.82	31	63	63.82	29	54
P53999	Activated RNA polymerase II transcriptional coactivator p15 OS=Homo sapiens GN=SUB1 PE=1 SV=3 - [TCP4_HUMAN]	75.59	1	15	15	117	70.87	11	20	61.42	10	17	61.42	10	18	74.02	13	24	61.42	12	19	61.42	12	19
P05783	Keratin, type I cytoskeletal 18 OS=Homo sapiens GN=KRT18 PE=1 SV=2 - [K1C18_HUMAN]	75.58	1	35	35	383	55.58	25	50	63.95	26	55	61.4	26	69	75.12	32	78	65.12	29	65	54.19	24	66
P11142	Heat shock cognate 71 kDa protein OS=Homo sapiens GN=HSPA8 PE=1 SV=1 - [HSP7C_HUMAN]	75.54	2	63	70	1559	67.03	60	270	61.76	58	236	75.54	66	278	75.54	66	269	71.36	60	265	65.94	59	241
P04406	Glyceraldehyde-3-phosphate dehydrogenase OS=Homo sapiens GN=GAPDH PE=1 SV=3 - [G3P_HUMAN]	75.52	2	45	45	1193	72.54	39	194	68.96	36	183	75.52	44	217	72.54	38	218	72.54	40	195	72.54	41	186
Q7RTV0	PHD finger-like domain-containing protein 5A OS=Homo sapiens GN=PHF5A PE=1 SV=1 - [PHF5A_HUMAN]	75.45	1	9	9	65	63.64	5	11	63.64	5	10	69.09	7	10	67.27	7	11	74.55	7	13	63.64	6	10
P30101	Protein disulfide-isomerase A3 OS=Homo sapiens GN=PDIA3 PE=1 SV=4 - [PDIA3_HUMAN]	75.45	1	55	55	652	67.72	44	105	66.34	41	102	70.3	44	120	67.33	46	116	68.32	45	111	65.35	44	98
O00622	Protein CYR61 OS=Homo sapiens GN=CYR61 PE=1 SV=1 - [CYR61_HUMAN]	75.33	1	35	35	330	70.87	26	47	62.73	26	47	68.5	29	53	75.33	32	67	71.65	26	54	70.87	28	62
P61927	60S ribosomal protein L37 OS=Homo sapiens GN=RPL37 PE=1 SV=2 - [RL37_HUMAN]	75.26	1	17	17	96	49.48	6	9	56.7	10	16	54.64	7	12	68.04	13	23	65.98	8	15	67.01	11	21
P62304	Small nuclear ribonucleoprotein E OS=Homo sapiens GN=SNRPE PE=1 SV=1 - [RUXE_HUMAN]	75	1	7	7	71	67.39	6	12	32.61	3	9	65.22	5	13	72.83	6	15	65.22	5	11	38.04	4	11
Q99497	Protein deglycase DJ-1 OS=Homo sapiens GN=PARK7 PE=1 SV=2 - [PARK7_HUMAN]	74.6	1	13	13	164	42.86	7	28	42.86	7	21	60.85	10	27	74.6	13	37	69.31	11	31	42.86	7	20
O60814	Histone H2B type 1-K OS=Homo sapiens GN=HIST1H2BK PE=1 SV=3 - [H2B1K_HUMAN]	74.6	2	8	29	908	74.6	25	162	74.6	27	164	74.6	27	154	74.6	26	155	74.6	26	135	74.6	27	138
P23527	Histone H2B type 1-O OS=Homo sapiens GN=HIST1H2BO PE=1 SV=3 - [H2B1O_HUMAN]	74.6	6	1	29	894	74.6	25	161	74.6	27	161	74.6	27	153	74.6	26	155	74.6	26	131	74.6	27	133
P46782	40S ribosomal protein S5 OS=Homo sapiens GN=RPS5 PE=1 SV=4 - [RS5_HUMAN]	74.51	1	30	30	263	72.06	23	54	71.57	22	37	74.51	24	47	71.57	24	44	69.12	21	44	61.27	23	37
P17987	T-complex protein 1 subunit alpha OS=Homo sapiens GN=TCP1 PE=1 SV=1 - [TCPA_HUMAN]	74.46	1	38	38	281	65.83	28	49	53.42	21	36	73.02	33	62	64.57	26	42	61.33	24	52	57.01	21	40
P62847	40S ribosomal protein S24 OS=Homo sapiens GN=RPS24 PE=1 SV=1 - [RS24_HUMAN]	74.44	1	26	26	251	66.17	17	37	72.93	20	41	65.41	15	37	74.44	25	45	58.65	14	33	74.44	21	58
O14737	Programmed cell death protein 5 OS=Homo sapiens GN=PDCD5 PE=1 SV=3 - [PDCD5_HUMAN]	74.4	1	9	9	67	74.4	7	10	43.2	5	8	74.4	8	16	74.4	9	14	74.4	8	11	43.2	5	8
P40429	60S ribosomal protein L13a OS=Homo sapiens GN=RPL13A PE=1 SV=2 - [RL13A_HUMAN]	74.38	2	24	24	156	59.61	17	28	52.71	11	31	65.02	15	28	60.1	16	24	61.08	13	26	42.36	8	19
P13639	Elongation factor 2 OS=Homo sapiens GN=EEF2 PE=1 SV=4 - [EF2_HUMAN]	74.36	1	66	67	1040	65.85	57	176	59.91	50	158	72.26	62	209	63.87	55	182	63.05	54	163	58.39	50	152
Q15691	Microtubule-associated protein RP/EB family member 1 OS=Homo sapiens GN=MAPRE1 PE=1 SV=3 - [MARE1_HUMAN]	74.25	2	17	17	152	40.3	10	24	30.22	8	20	58.96	14	28	64.18	16	32	39.18	13	23	30.22	10	25
P15311	Ezrin OS=Homo sapiens GN=EZR PE=1 SV=4 - [EZRI_HUMAN]	74.23	2	40	54	468	67.41	44	78	53.24	33	65	62.8	41	81	73.21	46	97	66.21	46	83	63.65	38	64
O75347	Tubulin-specific chaperone A OS=Homo sapiens GN=TBCA PE=1 SV=3 - [TBCA_HUMAN]	74.07	1	11	11	114	51.85	7	17	62.04	7	17	63.89	10	24	63.89	9	17	74.07	9	20	51.85	6	19
P16949	Stathmin OS=Homo sapiens GN=STMN1 PE=1 SV=3 - [STMN1_HUMAN]	73.83	3	18	18	160	55.7	10	27	58.39	12	18	55.7	10	24	73.83	17	32	55.7	10	30	58.39	13	29
P08107	Heat shock 70 kDa protein 1A/1B OS=Homo sapiens GN=HSPA1A PE=1 SV=5 - [HSP71_HUMAN]	73.79	2	42	48	574	63.65	36	99	52.89	35	85	69.42	42	105	67.86	40	101	65.37	38	92	61.31	35	92
P39748	Flap endonuclease 1 OS=Homo sapiens GN=FEN1 PE=1 SV=1 - [FEN1_HUMAN]	73.68	1	22	22	153	60.79	16	27	42.89	11	23	56.84	14	30	55.53	13	23	51.58	12	24	53.42	13	26
O75506	Heat shock factor-binding protein 1 OS=Homo sapiens GN=HSBP1 PE=1 SV=1 - [HSBP1_HUMAN]	73.68	1	2	2	15	73.68	2	2	34.21	1	2	73.68	2	2	73.68	2	3	73.68	2	3	73.68	2	3
Q15365	Poly(rC)-binding protein 1 OS=Homo sapiens GN=PCBP1 PE=1 SV=2 - [PCBP1_HUMAN]	73.6	1	20	24	408	60.67	21	72	60.67	19	55	73.6	23	75	60.67	20	74	60.67	21	66	60.67	20	66
P21291	Cysteine and glycine-rich protein 1 OS=Homo sapiens GN=CSRP1 PE=1 SV=3 - [CSRP1_HUMAN]	73.58	1	24	26	318	64.77	22	51	71.5	22	49	71.5	23	68	73.58	22	53	64.77	23	51	68.39	21	46
P49368	T-complex protein 1 subunit gamma OS=Homo sapiens GN=CCT3 PE=1 SV=4 - [TCPG_HUMAN]	73.58	1	48	48	466	64.4	37	72	58.9	37	70	67.34	41	85	63.67	40	87	67.16	38	73	53.58	36	79
Q13885	Tubulin beta-2A chain OS=Homo sapiens GN=TUBB2A PE=1 SV=1 - [TBB2A_HUMAN]	73.48	2	1	32	705	56.18	24	116	48.99	23	101	60.67	28	129	61.57	27	127	62.92	30	126	56.4	23	106
P06748	Nucleophosmin OS=Homo sapiens GN=NPM1 PE=1 SV=2 - [NPM_HUMAN]	73.47	1	29	29	616	61.22	21	108	58.16	19	85	61.22	23	118	57.14	20	109	61.22	20	95	51.7	19	101
Q15369	Transcription elongation factor B polypeptide 1 OS=Homo sapiens GN=TCEB1 PE=1 SV=1 - [ELOC_HUMAN]	73.21	1	7	7	69	53.57	4	12	53.57	4	11	64.29	5	11	52.68	5	13	64.29	5	11	52.68	4	11
Q99622	Protein C10 OS=Homo sapiens GN=C12orf57 PE=1 SV=1 - [C10_HUMAN]	73.02	1	5	5	44	58.73	4	5	34.13	2	3	34.13	2	12	73.02	5	12	58.73	4	9	34.13	2	3
P08238	Heat shock protein HSP 90-beta OS=Homo sapiens GN=HSP90AB1 PE=1 SV=4 - [HS90B_HUMAN]	72.51	5	51	76	1013	65.61	59	163	60.22	51	137	69.75	64	193	70.44	67	207	68.09	62	165	58.43	50	148
Q07020	60S ribosomal protein L18 OS=Homo sapiens GN=RPL18 PE=1 SV=2 - [RL18_HUMAN]	72.34	1	26	26	209	67.55	20	34	59.04	19	35	62.77	18	32	63.83	20	33	63.83	16	37	65.96	20	38
O60493	Sorting nexin-3 OS=Homo sapiens GN=SNX3 PE=1 SV=3 - [SNX3_HUMAN]	72.22	1	11	11	46	33.33	3	4	48.77	5	6	59.88	6	11	58.02	7	8	70.99	7	10	50	6	7
P52565	Rho GDP-dissociation inhibitor 1 OS=Homo sapiens GN=ARHGDIA PE=1 SV=3 - [GDIR1_HUMAN]	72.06	1	18	18	190	68.14	14	33	47.55	13	28	71.08	15	31	50.98	16	36	47.06	13	30	50.98	15	32
P16104	Histone H2AX OS=Homo sapiens GN=H2AFX PE=1 SV=2 - [H2AX_HUMAN]	72.03	2	1	18	338	65.73	14	56	55.94	14	53	65.73	15	53	70.63	17	51	62.94	13	54	67.83	14	71
P25786	Proteasome subunit alpha type-1 OS=Homo sapiens GN=PSMA1 PE=1 SV=1 - [PSA1_HUMAN]	71.86	1	22	22	270	66.92	18	45	57.41	16	37	64.26	19	55	68.82	20	52	61.98	16	38	59.32	18	43
P62269	40S ribosomal protein S18 OS=Homo sapiens GN=RPS18 PE=1 SV=3 - [RS18_HUMAN]	71.71	1	33	33	305	57.24	25	56	53.95	26	47	61.18	27	53	66.45	28	55	68.42	27	47	52.63	24	47
P62241	40S ribosomal protein S8 OS=Homo sapiens GN=RPS8 PE=1 SV=2 - [RS8_HUMAN]	71.63	1	32	32	537	67.31	25	91	71.15	28	83	67.31	24	92	71.63	26	87	66.83	25	88	70.19	27	96
P61313	60S ribosomal protein L15 OS=Homo sapiens GN=RPL15 PE=1 SV=2 - [RL15_HUMAN]	71.57	2	26	26	168	51.47	14	26	46.57	15	28	30.88	14	28	59.31	18	30	63.24	16	30	41.18	13	26
Q9BRA2	Thioredoxin domain-containing protein 17 OS=Homo sapiens GN=TXNDC17 PE=1 SV=1 - [TXD17_HUMAN]	71.54	1	8	8	36	39.02	3	6	21.14	2	5	52.85	4	7	71.54	7	10	41.46	4	5	41.46	3	3
P09651	Heterogeneous nuclear ribonucleoprotein A1 OS=Homo sapiens GN=HNRNPA1 PE=1 SV=5 - [ROA1_HUMAN]	71.51	1	15	33	497	60.22	29	86	60.48	26	75	59.95	26	87	71.51	29	90	62.37	27	72	60.48	28	87
Q16527	Cysteine and glycine-rich protein 2 OS=Homo sapiens GN=CSRP2 PE=1 SV=3 - [CSRP2_HUMAN]	71.5	1	14	16	105	47.67	11	16	35.75	8	13	40.93	10	19	47.67	12	24	42.49	10	16	64.25	13	17
P50991	T-complex protein 1 subunit delta OS=Homo sapiens GN=CCT4 PE=1 SV=4 - [TCPD_HUMAN]	71.06	1	42	43	321	58.07	28	56	50.28	23	41	64.94	35	63	69.02	39	60	66.6	31	53	52.32	29	48
Q9H910	Hematological and neurological expressed 1-like protein OS=Homo sapiens GN=HN1L PE=1 SV=1 - [HN1L_HUMAN]	71.05	1	8	8	94	46.32	6	20	60.53	7	14	46.32	6	14	71.05	8	15	46.32	6	16	71.05	8	15
P56385	ATP synthase subunit e, mitochondrial OS=Homo sapiens GN=ATP5I PE=1 SV=2 - [ATP5I_HUMAN]	71.01	1	7	7	60	71.01	7	12	66.67	6	10	71.01	6	12	66.67	4	6	66.67	5	12	66.67	5	8
P29692	Elongation factor 1-delta OS=Homo sapiens GN=EEF1D PE=1 SV=5 - [EF1D_HUMAN]	70.82	1	25	28	462	70.82	24	76	64.77	24	77	67.26	24	82	65.12	26	86	61.57	23	70	64.77	22	71
P00568	Adenylate kinase isoenzyme 1 OS=Homo sapiens GN=AK1 PE=1 SV=3 - [KAD1_HUMAN]	70.62	1	15	15	99	65.46	9	11	55.67	8	17	56.19	9	18	65.46	13	19	62.37	11	15	61.34	10	19
P04731	Metallothionein-1A OS=Homo sapiens GN=MT1A PE=1 SV=2 - [MT1A_HUMAN]	70.49	3	2	4	59	13.11	1	1	13.11	1	2	54.1	2	49	45.9	2	4	16.39	1	1	13.11	1	2
P84098	60S ribosomal protein L19 OS=Homo sapiens GN=RPL19 PE=1 SV=1 - [RL19_HUMAN]	70.41	1	29	29	287	63.27	23	52	59.69	21	40	59.69	22	43	63.78	25	51	55.61	21	49	66.84	25	52
Q9Y3I0	tRNA-splicing ligase RtcB homolog OS=Homo sapiens GN=RTCB PE=1 SV=1 - [RTCB_HUMAN]	70.3	1	32	32	245	41.58	19	40	40.79	19	32	60.59	26	47	57.62	25	53	61.98	20	37	44.16	20	36
P63241	Eukaryotic translation initiation factor 5A-1 OS=Homo sapiens GN=EIF5A PE=1 SV=2 - [IF5A1_HUMAN]	70.13	3	13	13	105	50	9	18	31.82	7	11	50.65	10	21	66.88	11	25	51.95	10	18	39.61	8	12
P17096	High mobility group protein HMG-I/HMG-Y OS=Homo sapiens GN=HMGA1 PE=1 SV=3 - [HMGA1_HUMAN]	70.09	1	6	6	53	23.36	1	4	38.32	2	4	41.12	2	6	66.36	5	17	44.86	3	7	66.36	4	15
P07951	Tropomyosin beta chain OS=Homo sapiens GN=TPM2 PE=1 SV=1 - [TPM2_HUMAN]	70.07	1	10	36	420	58.8	28	68	61.27	29	61	63.73	30	62	70.07	33	83	59.86	30	69	63.38	30	77
P62829	60S ribosomal protein L23 OS=Homo sapiens GN=RPL23 PE=1 SV=1 - [RL23_HUMAN]	70	1	21	21	215	65	18	45	65	15	28	65	16	51	65	16	34	60	15	28	47.14	13	29
P20290	Transcription factor BTF3 OS=Homo sapiens GN=BTF3 PE=1 SV=1 - [BTF3_HUMAN]	69.9	1	7	10	120	62.14	8	20	62.14	6	11	66.02	8	31	66.02	8	26	66.02	8	19	62.14	7	13
P61353	60S ribosomal protein L27 OS=Homo sapiens GN=RPL27 PE=1 SV=2 - [RL27_HUMAN]	69.85	1	14	14	103	53.68	9	20	52.21	9	15	62.5	9	12	58.09	10	26	69.85	11	18	36.03	8	12
P60981	Destrin OS=Homo sapiens GN=DSTN PE=1 SV=3 - [DEST_HUMAN]	69.7	1	11	15	154	48.48	11	28	51.52	9	20	49.09	11	27	67.88	11	30	51.52	10	26	46.06	10	23
P68104	Elongation factor 1-alpha 1 OS=Homo sapiens GN=EEF1A1 PE=1 SV=1 - [EF1A1_HUMAN]	69.7	2	24	43	677	60.61	35	114	59.31	32	87	62.77	34	115	68.83	38	140	64.29	36	122	62.99	31	99
P62910	60S ribosomal protein L32 OS=Homo sapiens GN=RPL32 PE=1 SV=2 - [RL32_HUMAN]	69.63	1	17	17	252	67.41	15	68	67.41	13	31	67.41	12	31	67.41	14	42	67.41	15	40	69.63	15	40
P10599	Thioredoxin OS=Homo sapiens GN=TXN PE=1 SV=3 - [THIO_HUMAN]	69.52	1	7	7	67	69.52	7	12	42.86	4	7	69.52	5	13	69.52	6	14	42.86	5	12	42.86	4	9
P62158	Calmodulin OS=Homo sapiens GN=CALM1 PE=1 SV=2 - [CALM_HUMAN]	69.13	1	5	5	73	66.44	4	17	66.44	4	9	69.13	5	17	69.13	5	10	69.13	5	9	66.44	4	11
P07237	Protein disulfide-isomerase OS=Homo sapiens GN=P4HB PE=1 SV=3 - [PDIA1_HUMAN]	69.09	1	39	39	412	56.3	27	60	56.5	27	57	69.09	33	78	56.69	32	71	63.98	32	75	53.54	27	71
P46781	40S ribosomal protein S9 OS=Homo sapiens GN=RPS9 PE=1 SV=3 - [RS9_HUMAN]	69.07	1	25	25	166	48.45	16	26	42.27	14	21	69.07	22	37	56.19	18	29	57.73	17	29	42.78	16	24
Q15819	Ubiquitin-conjugating enzyme E2 variant 2 OS=Homo sapiens GN=UBE2V2 PE=1 SV=4 - [UB2V2_HUMAN]	68.97	1	7	12	105	60	9	20	60	9	17	60	8	16	68.97	11	21	60	9	17	60	7	14
Q99832	T-complex protein 1 subunit eta OS=Homo sapiens GN=CCT7 PE=1 SV=2 - [TCPH_HUMAN]	68.88	1	41	41	355	53.04	29	62	36.83	22	46	61.69	34	74	60.96	31	65	46.96	27	60	46.96	26	48
P35754	Glutaredoxin-1 OS=Homo sapiens GN=GLRX PE=1 SV=2 - [GLRX1_HUMAN]	68.87	1	3	3	18	41.51	2	2	41.51	2	2	68.87	3	4	41.51	2	3	68.87	3	5	41.51	2	2
P62854	40S ribosomal protein S26 OS=Homo sapiens GN=RPS26 PE=1 SV=3 - [RS26_HUMAN]	68.7	2	14	14	198	67.83	11	33	66.09	12	31	65.22	11	34	66.09	12	37	66.09	12	31	66.09	12	32
P46777	60S ribosomal protein L5 OS=Homo sapiens GN=RPL5 PE=1 SV=3 - [RL5_HUMAN]	68.69	1	23	23	236	57.91	19	39	59.93	18	33	56.57	18	51	66.67	21	34	65.66	20	40	62.96	18	39
Q15370	Transcription elongation factor B polypeptide 2 OS=Homo sapiens GN=TCEB2 PE=1 SV=1 - [ELOB_HUMAN]	68.64	1	8	8	80	68.64	7	16	36.44	5	12	68.64	8	15	68.64	7	13	36.44	6	13	36.44	5	11
P36578	60S ribosomal protein L4 OS=Homo sapiens GN=RPL4 PE=1 SV=5 - [RL4_HUMAN]	68.62	1	57	57	698	62.53	48	127	61.59	46	105	68.15	50	134	65.81	44	106	66.51	47	125	63.23	45	101
Q15785	Mitochondrial import receptor subunit TOM34 OS=Homo sapiens GN=TOMM34 PE=1 SV=2 - [TOM34_HUMAN]	68.61	1	19	19	180	58.58	16	24	53.07	14	31	64.08	16	33	58.25	15	40	61.17	16	29	57.93	16	23
Q99714	3-hydroxyacyl-CoA dehydrogenase type-2 OS=Homo sapiens GN=HSD17B10 PE=1 SV=3 - [HCD2_HUMAN]	68.58	1	12	12	104	52.11	8	19	42.53	7	13	56.7	8	19	55.56	11	24	52.11	8	18	42.53	6	11
P24534	Elongation factor 1-beta OS=Homo sapiens GN=EEF1B2 PE=1 SV=3 - [EF1B_HUMAN]	68.44	1	13	16	249	68.44	13	41	64.89	12	35	65.33	11	45	68.44	14	53	60.89	10	37	64.89	12	38
P62633	Cellular nucleic acid-binding protein OS=Homo sapiens GN=CNBP PE=1 SV=1 - [CNBP_HUMAN]	68.36	1	14	14	117	48.02	9	16	40.11	9	15	50.28	10	19	68.36	13	27	68.36	11	19	53.11	10	21
P11940	Polyadenylate-binding protein 1 OS=Homo sapiens GN=PABPC1 PE=1 SV=2 - [PABP1_HUMAN]	68.24	5	41	64	547	53.93	50	90	54.87	46	83	56.45	50	94	59.43	54	117	53.62	42	78	58.02	46	85
Q9UHV9	Prefoldin subunit 2 OS=Homo sapiens GN=PFDN2 PE=1 SV=1 - [PFD2_HUMAN]	68.18	1	9	9	79	66.23	7	12	66.23	7	12	66.23	8	13	66.23	8	16	66.23	8	11	68.18	9	15
P52815	39S ribosomal protein L12, mitochondrial OS=Homo sapiens GN=MRPL12 PE=1 SV=2 - [RM12_HUMAN]	68.18	1	11	11	59	55.56	6	10	51.01	5	7	55.56	7	10	55.56	6	9	64.14	8	13	55.05	7	10
P62081	40S ribosomal protein S7 OS=Homo sapiens GN=RPS7 PE=1 SV=1 - [RS7_HUMAN]	68.04	1	27	27	284	53.61	18	39	57.22	19	56	62.89	21	49	68.04	22	51	62.89	21	42	57.73	22	47
P22570	NADPH:adrenodoxin oxidoreductase, mitochondrial OS=Homo sapiens GN=FDXR PE=1 SV=3 - [ADRO_HUMAN]	67.62	1	27	27	211	51.53	21	35	47.66	22	40	67.21	26	42	47.86	17	30	51.53	20	30	45.82	18	34
P09493	Tropomyosin alpha-1 chain OS=Homo sapiens GN=TPM1 PE=1 SV=2 - [TPM1_HUMAN]	67.61	1	12	32	390	53.17	26	66	55.63	27	58	54.23	24	56	62.32	30	74	59.51	28	63	56.34	27	73
P20700	Lamin-B1 OS=Homo sapiens GN=LMNB1 PE=1 SV=2 - [LMNB1_HUMAN]	67.58	1	45	54	467	50.85	35	76	58.36	34	64	60.75	40	77	61.95	46	91	65.02	46	82	63.82	37	77
P00441	Superoxide dismutase [Cu-Zn] OS=Homo sapiens GN=SOD1 PE=1 SV=2 - [SODC_HUMAN]	67.53	1	8	8	79	59.09	7	12	37.66	5	9	59.09	7	12	46.1	6	13	67.53	8	21	59.09	6	12
Q8N257	Histone H2B type 3-B OS=Homo sapiens GN=HIST3H2BB PE=1 SV=3 - [H2B3B_HUMAN]	67.46	1	2	21	633	67.46	18	113	67.46	20	118	67.46	20	102	67.46	19	111	67.46	18	93	67.46	20	96
Q96DA6	Mitochondrial import inner membrane translocase subunit TIM14 OS=Homo sapiens GN=DNAJC19 PE=1 SV=3 - [TIM14_HUMAN]	67.24	1	5	5	32	54.31	4	4	51.72	4	4	38.79	3	5	54.31	4	9	38.79	3	4	37.93	3	6
P31946	14-3-3 protein beta/alpha OS=Homo sapiens GN=YWHAB PE=1 SV=3 - [1433B_HUMAN]	67.07	1	15	28	315	59.76	18	52	43.09	16	67	62.2	23	61	57.72	20	47	54.88	15	43	54.88	18	45
O43399	Tumor protein D54 OS=Homo sapiens GN=TPD52L2 PE=1 SV=2 - [TPD54_HUMAN]	66.99	1	10	10	96	56.8	7	14	64.56	8	20	66.5	9	14	57.28	8	16	56.8	7	13	64.56	8	19
P61978	Heterogeneous nuclear ribonucleoprotein K OS=Homo sapiens GN=HNRNPK PE=1 SV=1 - [HNRPK_HUMAN]	66.95	1	35	35	478	63.93	31	83	56.16	29	88	61.12	30	89	61.34	28	71	56.16	30	74	61.12	28	73
P62979	Ubiquitin-40S ribosomal protein S27a OS=Homo sapiens GN=RPS27A PE=1 SV=2 - [RS27A_HUMAN]	66.67	3	11	16	203	61.54	13	31	50	11	23	66.67	15	41	53.85	13	37	61.54	14	38	50	12	33
P46783	40S ribosomal protein S10 OS=Homo sapiens GN=RPS10 PE=1 SV=1 - [RS10_HUMAN]	66.67	1	10	12	160	53.94	10	22	50.3	10	41	41.82	7	24	59.39	11	25	46.67	9	19	50.3	10	29
P37108	Signal recognition particle 14 kDa protein OS=Homo sapiens GN=SRP14 PE=1 SV=2 - [SRP14_HUMAN]	66.18	1	14	14	109	55.15	8	16	61.76	8	17	55.15	9	19	66.18	11	21	55.15	8	20	55.15	8	16
Q14116	Interleukin-18 OS=Homo sapiens GN=IL18 PE=1 SV=1 - [IL18_HUMAN]	65.8	1	15	15	115	43.52	8	21	44.56	8	17	50.78	9	20	63.21	10	20	54.4	10	22	42.49	7	15
P52597	Heterogeneous nuclear ribonucleoprotein F OS=Homo sapiens GN=HNRNPF PE=1 SV=3 - [HNRPF_HUMAN]	65.78	1	24	24	204	55.18	20	38	57.35	17	32	53.49	21	40	54.46	18	34	46.51	15	32	55.9	17	28
P23284	Peptidyl-prolyl cis-trans isomerase B OS=Homo sapiens GN=PPIB PE=1 SV=2 - [PPIB_HUMAN]	65.74	1	22	22	218	65.28	18	36	52.78	16	37	58.33	18	35	65.28	20	37	58.8	19	37	65.28	19	36
P50914	60S ribosomal protein L14 OS=Homo sapiens GN=RPL14 PE=1 SV=4 - [RL14_HUMAN]	65.58	1	30	30	315	55.81	24	52	63.26	26	52	56.74	23	54	65.58	26	52	60	25	56	64.65	24	49
P62314	Small nuclear ribonucleoprotein Sm D1 OS=Homo sapiens GN=SNRPD1 PE=1 SV=1 - [SMD1_HUMAN]	65.55	1	6	6	73	48.74	4	10	63.87	5	8	47.9	5	17	63.87	5	14	63.87	5	14	48.74	4	10
P13804	Electron transfer flavoprotein subunit alpha, mitochondrial OS=Homo sapiens GN=ETFA PE=1 SV=1 - [ETFA_HUMAN]	65.47	1	21	21	164	51.95	13	20	46.25	11	22	58.26	16	28	63.06	18	36	59.76	15	31	45.35	14	27
P50479	PDZ and LIM domain protein 4 OS=Homo sapiens GN=PDLIM4 PE=1 SV=2 - [PDLI4_HUMAN]	65.45	1	22	22	186	56.06	15	26	49.7	14	29	56.06	16	31	65.45	18	41	59.09	16	27	58.48	15	32
O75531	Barrier-to-autointegration factor OS=Homo sapiens GN=BANF1 PE=1 SV=1 - [BAF_HUMAN]	65.17	1	5	5	49	34.83	3	8	38.2	4	9	38.2	4	7	65.17	5	9	65.17	5	9	38.2	4	7
P15954	Cytochrome c oxidase subunit 7C, mitochondrial OS=Homo sapiens GN=COX7C PE=1 SV=1 - [COX7C_HUMAN]	65.08	1	4	4	28	65.08	2	4	38.1	2	2	65.08	3	5	65.08	4	9	65.08	3	5	38.1	2	3
P60900	Proteasome subunit alpha type-6 OS=Homo sapiens GN=PSMA6 PE=1 SV=1 - [PSA6_HUMAN]	65.04	1	18	18	173	52.85	14	31	60.57	13	22	52.85	14	37	56.1	15	30	60.57	16	28	50.81	13	25
P42766	60S ribosomal protein L35 OS=Homo sapiens GN=RPL35 PE=1 SV=2 - [RL35_HUMAN]	65.04	1	15	15	163	56.91	11	36	51.22	10	27	54.47	11	28	44.72	8	21	56.1	13	28	46.34	9	23
P26038	Moesin OS=Homo sapiens GN=MSN PE=1 SV=3 - [MOES_HUMAN]	64.99	1	34	50	377	43.5	32	64	45.93	30	51	47.31	35	71	52.34	40	72	43.85	36	57	41.59	31	62
O43447	Peptidyl-prolyl cis-trans isomerase H OS=Homo sapiens GN=PPIH PE=1 SV=1 - [PPIH_HUMAN]	64.97	1	9	10	76	57.06	9	15	57.06	7	9	57.06	8	14	64.97	8	15	64.97	10	14	64.97	9	9
P60660	Myosin light polypeptide 6 OS=Homo sapiens GN=MYL6 PE=1 SV=2 - [MYL6_HUMAN]	64.9	4	11	11	224	64.9	11	37	64.9	10	35	64.9	11	42	64.9	11	46	64.9	10	33	64.9	10	31
P52272	Heterogeneous nuclear ribonucleoprotein M OS=Homo sapiens GN=HNRNPM PE=1 SV=3 - [HNRPM_HUMAN]	64.66	1	60	64	834	62.05	57	159	61.64	56	143	60.27	53	136	53.7	47	126	61.1	50	134	60.27	51	136
Q5HYN5	Cancer/testis antigen family 45 member A1 OS=Homo sapiens GN=CT45A1 PE=2 SV=1 - [CT451_HUMAN]	64.55	2	6	15	125	43.39	10	23	39.15	9	21	41.27	10	16	60.85	13	22	59.26	11	23	46.56	9	20
O60664	Perilipin-3 OS=Homo sapiens GN=PLIN3 PE=1 SV=3 - [PLIN3_HUMAN]	64.52	1	24	24	209	47.24	16	29	51.38	16	29	54.15	20	35	58.29	22	43	50.23	18	35	60.37	19	38
Q9NPA8	Transcription and mRNA export factor ENY2 OS=Homo sapiens GN=ENY2 PE=1 SV=1 - [ENY2_HUMAN]	64.36	1	5	5	28	47.52	4	5	47.52	4	4	32.67	3	5	53.47	4	5	36.63	3	3	64.36	5	6
Q9BSD7	Cancer-related nucleoside-triphosphatase OS=Homo sapiens GN=NTPCR PE=1 SV=1 - [NTPCR_HUMAN]	64.21	1	9	9	51	41.05	5	11	18.95	3	4	41.05	5	10	55.26	7	10	51.05	6	9	42.63	6	7
P12004	Proliferating cell nuclear antigen OS=Homo sapiens GN=PCNA PE=1 SV=1 - [PCNA_HUMAN]	63.98	1	16	16	200	63.98	15	32	52.87	13	35	52.87	15	34	51.72	13	36	52.87	14	28	52.87	14	35
P05198	Eukaryotic translation initiation factor 2 subunit 1 OS=Homo sapiens GN=EIF2S1 PE=1 SV=3 - [IF2A_HUMAN]	63.81	1	16	16	135	43.49	10	21	51.11	11	21	47.3	11	22	58.1	14	31	50.16	12	18	47.94	11	22
Q14192	Four and a half LIM domains protein 2 OS=Homo sapiens GN=FHL2 PE=1 SV=3 - [FHL2_HUMAN]	63.8	1	20	20	176	56.27	14	28	58.78	16	24	55.56	16	29	63.8	19	38	60.93	17	34	59.14	16	23
P50454	Serpin H1 OS=Homo sapiens GN=SERPINH1 PE=1 SV=2 - [SERPH_HUMAN]	63.4	1	21	21	217	42.34	14	33	47.61	15	29	54.78	17	39	53.35	16	38	53.59	16	47	44.98	15	31
O75947	ATP synthase subunit d, mitochondrial OS=Homo sapiens GN=ATP5H PE=1 SV=3 - [ATP5H_HUMAN]	63.35	1	12	12	136	50.31	9	19	50.31	9	22	57.14	10	26	56.52	9	20	49.69	8	22	44.1	8	27
P50990	T-complex protein 1 subunit theta OS=Homo sapiens GN=CCT8 PE=1 SV=4 - [TCPQ_HUMAN]	63.32	1	40	40	378	48.91	25	55	53.83	27	56	56.75	32	68	62.23	35	77	60.58	33	61	61.68	30	61
Q13404	Ubiquitin-conjugating enzyme E2 variant 1 OS=Homo sapiens GN=UBE2V1 PE=1 SV=2 - [UB2V1_HUMAN]	63.27	1	7	12	100	49.66	10	18	59.86	9	18	59.86	9	16	63.27	10	22	59.86	10	16	45.58	6	10
O00244	Copper transport protein ATOX1 OS=Homo sapiens GN=ATOX1 PE=1 SV=1 - [ATOX1_HUMAN]	63.24	1	6	6	30	30.88	2	4	26.47	1	1	42.65	3	7	63.24	5	7	42.65	4	5	42.65	4	6
P09132	Signal recognition particle 19 kDa protein OS=Homo sapiens GN=SRP19 PE=1 SV=3 - [SRP19_HUMAN]	63.19	1	10	10	59	54.17	5	8	36.81	4	5	63.19	8	15	55.56	9	13	54.17	6	12	36.81	4	6
Q9Y490	Talin-1 OS=Homo sapiens GN=TLN1 PE=1 SV=3 - [TLN1_HUMAN]	63.09	1	129	147	1239	55.33	110	215	46.24	91	157	56.32	120	244	58.52	122	235	51.95	108	203	48.56	97	185
Q96C01	Protein FAM136A OS=Homo sapiens GN=FAM136A PE=1 SV=1 - [F136A_HUMAN]	63.04	1	7	7	46	46.38	5	11	39.13	3	8	46.38	4	6	63.04	7	9	46.38	5	7	46.38	4	5
Q15843	NEDD8 OS=Homo sapiens GN=NEDD8 PE=1 SV=1 - [NEDD8_HUMAN]	62.96	1	5	5	56	62.96	5	8	62.96	5	9	62.96	5	7	62.96	5	10	62.96	5	13	62.96	5	9
Q13185	Chromobox protein homolog 3 OS=Homo sapiens GN=CBX3 PE=1 SV=4 - [CBX3_HUMAN]	62.84	1	8	11	120	34.97	7	19	40.98	8	16	56.83	10	25	46.99	10	25	40.98	9	16	40.98	8	19
P62851	40S ribosomal protein S25 OS=Homo sapiens GN=RPS25 PE=1 SV=1 - [RS25_HUMAN]	62.4	1	18	18	238	52	14	48	52	13	33	52	14	41	62.4	17	45	52	15	39	52	15	32
P17980	26S protease regulatory subunit 6A OS=Homo sapiens GN=PSMC3 PE=1 SV=3 - [PRS6A_HUMAN]	62.19	1	42	42	382	55.13	28	63	54.9	26	51	59	35	71	61.96	31	70	61.05	30	63	55.13	29	64
P07900	Heat shock protein HSP 90-alpha OS=Homo sapiens GN=HSP90AA1 PE=1 SV=5 - [HS90A_HUMAN]	62.16	4	37	59	653	48.63	42	102	44.95	39	91	52.46	48	120	55.74	48	138	50.96	43	101	49.59	40	101
P56537	Eukaryotic translation initiation factor 6 OS=Homo sapiens GN=EIF6 PE=1 SV=1 - [IF6_HUMAN]	62.04	1	7	7	40	53.06	6	8	23.27	3	6	29.8	4	7	46.12	6	9	40.82	4	6	23.27	3	4
Q9Y3B7	39S ribosomal protein L11, mitochondrial OS=Homo sapiens GN=MRPL11 PE=1 SV=1 - [RM11_HUMAN]	61.98	1	10	10	75	58.33	7	11	58.33	8	13	58.33	7	12	58.33	9	14	61.98	9	14	58.33	7	11
P35579	Myosin-9 OS=Homo sapiens GN=MYH9 PE=1 SV=4 - [MYH9_HUMAN]	61.94	10	146	165	1308	46.17	105	202	43.88	104	183	51.68	116	234	54.69	137	262	47.65	113	210	46.94	115	217
Q9UJZ1	Stomatin-like protein 2, mitochondrial OS=Homo sapiens GN=STOML2 PE=1 SV=1 - [STML2_HUMAN]	61.8	1	12	12	57	36.24	8	10	31.46	5	7	50.56	10	10	48.6	8	10	42.13	8	11	43.82	7	9
P62913	60S ribosomal protein L11 OS=Homo sapiens GN=RPL11 PE=1 SV=2 - [RL11_HUMAN]	61.8	1	27	27	387	53.37	18	62	55.62	21	60	50.56	20	67	56.18	23	64	53.93	21	66	57.87	22	68
P07195	L-lactate dehydrogenase B chain OS=Homo sapiens GN=LDHB PE=1 SV=2 - [LDHB_HUMAN]	61.68	2	23	26	302	57.19	20	55	47.01	17	40	56.59	21	53	53.89	19	48	61.68	21	58	57.19	18	48
Q02790	Peptidyl-prolyl cis-trans isomerase FKBP4 OS=Homo sapiens GN=FKBP4 PE=1 SV=3 - [FKBP4_HUMAN]	61.66	1	32	32	301	38.78	23	47	41.18	22	50	52.94	23	51	45.75	23	56	47.06	25	53	38.78	21	44
P84103	Serine/arginine-rich splicing factor 3 OS=Homo sapiens GN=SRSF3 PE=1 SV=1 - [SRSF3_HUMAN]	61.59	1	17	18	183	52.44	10	23	60.37	11	33	59.76	15	34	60.37	14	33	51.22	9	27	61.59	13	33
P62195	26S protease regulatory subunit 8 OS=Homo sapiens GN=PSMC5 PE=1 SV=1 - [PRS8_HUMAN]	61.58	1	23	24	163	55.42	18	28	54.43	16	29	52.96	17	30	51.48	17	28	53.94	16	25	44.33	15	23
Q5U5X0	Complex III assembly factor LYRM7 OS=Homo sapiens GN=LYRM7 PE=1 SV=1 - [LYRM7_HUMAN]	61.54	1	6	6	34	36.54	3	7	37.5	4	6	40.38	3	6	51.92	4	6	25.96	2	6	35.58	3	3
P09429	High mobility group protein B1 OS=Homo sapiens GN=HMGB1 PE=1 SV=3 - [HMGB1_HUMAN]	61.4	2	12	24	253	55.81	20	36	54.42	16	38	54.42	20	34	61.4	22	52	54.88	18	48	55.81	20	45
P51991	Heterogeneous nuclear ribonucleoprotein A3 OS=Homo sapiens GN=HNRNPA3 PE=1 SV=2 - [ROA3_HUMAN]	61.38	1	25	26	265	43.92	19	39	55.29	21	44	45.77	17	47	56.35	22	52	55.03	20	37	58.99	23	46
P24752	Acetyl-CoA acetyltransferase, mitochondrial OS=Homo sapiens GN=ACAT1 PE=1 SV=1 - [THIL_HUMAN]	61.36	1	16	16	107	53.63	12	16	49.41	10	21	57.61	14	22	55.04	12	20	53.63	10	12	55.04	11	16
P11586	C-1-tetrahydrofolate synthase, cytoplasmic OS=Homo sapiens GN=MTHFD1 PE=1 SV=3 - [C1TC_HUMAN]	61.28	1	52	54	449	54.76	40	79	44.92	33	72	44.71	39	83	57.22	41	83	49.41	35	68	46.1	31	64
P38646	Stress-70 protein, mitochondrial OS=Homo sapiens GN=HSPA9 PE=1 SV=2 - [GRP75_HUMAN]	61.12	1	54	54	636	38.88	38	93	41.24	39	102	46.39	40	108	52.87	47	115	53.61	43	110	44.92	43	108
Q13015	Protein AF1q OS=Homo sapiens GN=MLLT11 PE=1 SV=1 - [AF1Q_HUMAN]	61.11	1	3	3	23	61.11	3	5	33.33	2	3	61.11	3	5	33.33	2	4	33.33	2	2	33.33	2	4
P67809	Nuclease-sensitive element-binding protein 1 OS=Homo sapiens GN=YBX1 PE=1 SV=3 - [YBOX1_HUMAN]	61.11	2	10	20	355	41.98	12	65	42.28	13	59	45.68	14	58	55.25	17	51	51.23	15	65	41.36	12	57
P31948	Stress-induced-phosphoprotein 1 OS=Homo sapiens GN=STIP1 PE=1 SV=1 - [STIP1_HUMAN]	60.96	1	33	33	389	44.2	24	63	48.99	24	53	52.67	25	67	49.17	27	75	46.59	25	62	54.51	26	69
P00338	L-lactate dehydrogenase A chain OS=Homo sapiens GN=LDHA PE=1 SV=2 - [LDHA_HUMAN]	60.84	4	22	25	193	53.31	18	35	34.04	15	26	54.22	23	41	47.89	19	34	49.1	18	35	31.33	13	22
P21333	Filamin-A OS=Homo sapiens GN=FLNA PE=1 SV=4 - [FLNA_HUMAN]	60.82	1	141	152	1589	46.62	100	263	45.22	98	220	52.25	119	294	53.61	122	302	52.85	114	266	47.22	95	244
P30040	Endoplasmic reticulum resident protein 29 OS=Homo sapiens GN=ERP29 PE=1 SV=4 - [ERP29_HUMAN]	60.54	1	14	14	192	45.98	11	34	52.11	11	28	52.11	12	33	57.85	12	34	52.11	12	36	51.72	11	27
O14818	Proteasome subunit alpha type-7 OS=Homo sapiens GN=PSMA7 PE=1 SV=1 - [PSA7_HUMAN]	60.48	2	23	23	191	59.68	18	32	60.48	20	28	56.45	18	32	57.26	20	35	59.68	18	30	59.68	19	34
P35998	26S protease regulatory subunit 7 OS=Homo sapiens GN=PSMC2 PE=1 SV=3 - [PRS7_HUMAN]	60.28	1	22	22	191	52.19	18	31	49.65	17	27	54.97	20	38	55.89	19	30	50.81	19	34	52.42	18	31
Q96L21	60S ribosomal protein L10-like OS=Homo sapiens GN=RPL10L PE=1 SV=3 - [RL10L_HUMAN]	60.28	1	1	27	263	52.34	20	45	53.27	21	42	52.34	19	45	54.67	22	48	48.13	17	39	53.27	20	44
P40227	T-complex protein 1 subunit zeta OS=Homo sapiens GN=CCT6A PE=1 SV=3 - [TCPZ_HUMAN]	60.26	2	34	34	351	54.43	27	53	58.76	26	51	60.26	30	63	58.76	29	61	58	26	62	54.8	25	61
P68032	Actin, alpha cardiac muscle 1 OS=Homo sapiens GN=ACTC1 PE=1 SV=1 - [ACTC_HUMAN]	60.21	3	1	32	881	48.28	26	144	54.11	29	135	51.19	28	155	45.09	28	166	42.18	25	126	44.56	27	155
P62942	Peptidyl-prolyl cis-trans isomerase FKBP1A OS=Homo sapiens GN=FKBP1A PE=1 SV=2 - [FKB1A_HUMAN]	60.19	1	6	6	40	49.07	3	7	12.96	1	5	50.93	4	11	50.93	5	6	14.81	2	6	22.22	2	5
Q9UQ80	Proliferation-associated protein 2G4 OS=Homo sapiens GN=PA2G4 PE=1 SV=3 - [PA2G4_HUMAN]	60.15	1	32	32	261	46.7	23	41	40.61	17	36	50.51	23	48	60.15	25	52	47.97	23	44	38.58	19	40
A6NDG6	Phosphoglycolate phosphatase OS=Homo sapiens GN=PGP PE=1 SV=1 - [PGP_HUMAN]	60.12	1	13	13	64	47.04	9	14	35.83	6	8	44.86	10	12	51.4	9	10	38.63	7	14	31.78	5	6
P09669	Cytochrome c oxidase subunit 6C OS=Homo sapiens GN=COX6C PE=1 SV=2 - [COX6C_HUMAN]	60	1	5	5	28	25.33	2	2	41.33	3	3	41.33	3	5	50.67	4	6	41.33	3	6	50.67	4	6
Q96EL3	39S ribosomal protein L53, mitochondrial OS=Homo sapiens GN=MRPL53 PE=1 SV=1 - [RM53_HUMAN]	59.82	1	6	6	31	50.89	5	6	39.29	3	4	32.14	3	5	38.39	3	3	39.29	4	6	48.21	4	7
Q08AG7	Mitotic-spindle organizing protein 1 OS=Homo sapiens GN=MZT1 PE=1 SV=2 - [MZT1_HUMAN]	59.76	1	3	3	9				19.51	1	3	19.51	1	2	59.76	3	4
P35244	Replication protein A 14 kDa subunit OS=Homo sapiens GN=RPA3 PE=1 SV=1 - [RFA3_HUMAN]	59.5	1	4	4	31	29.75	2	5	29.75	2	3	32.23	3	7	59.5	4	6	57.02	3	5	29.75	2	5
P62333	26S protease regulatory subunit 10B OS=Homo sapiens GN=PSMC6 PE=1 SV=1 - [PRS10_HUMAN]	59.38	1	27	27	197	55.53	20	35	49.1	16	23	58.1	21	47	52.44	22	33	56.56	20	30	42.67	16	29
P09622	Dihydrolipoyl dehydrogenase, mitochondrial OS=Homo sapiens GN=DLD PE=1 SV=2 - [DLDH_HUMAN]	59.14	1	28	28	173	41.45	18	26	38.31	17	21	47.74	19	33	48.13	20	31	44.6	18	34	48.92	20	28
O60925	Prefoldin subunit 1 OS=Homo sapiens GN=PFDN1 PE=1 SV=2 - [PFD1_HUMAN]	59.02	1	15	15	89	52.46	8	12	48.36	8	10	59.02	13	19	52.46	9	17	57.38	11	18	52.46	10	13
P42765	3-ketoacyl-CoA thiolase, mitochondrial OS=Homo sapiens GN=ACAA2 PE=1 SV=2 - [THIM_HUMAN]	58.94	1	18	18	102	54.66	11	19	46.35	9	10	54.16	14	26	46.6	12	16	40.05	10	17	50.13	10	14
P68366	Tubulin alpha-4A chain OS=Homo sapiens GN=TUBA4A PE=1 SV=1 - [TBA4A_HUMAN]	58.93	3	3	29	445	54.91	24	79	49.55	24	69	56.92	26	84	49.11	24	73	49.11	23	72	45.09	21	68
P62891	60S ribosomal protein L39 OS=Homo sapiens GN=RPL39 PE=1 SV=2 - [RL39_HUMAN]	58.82	2	5	5	36	58.82	4	5	25.49	2	5	39.22	4	9	25.49	3	6	25.49	2	5	39.22	3	6
Q9GZT3	SRA stem-loop-interacting RNA-binding protein, mitochondrial OS=Homo sapiens GN=SLIRP PE=1 SV=1 - [SLIRP_HUMAN]	58.72	1	7	7	73	57.8	5	10	57.8	5	10	57.8	6	13	58.72	7	14	57.8	6	14	57.8	6	12
P40925	Malate dehydrogenase, cytoplasmic OS=Homo sapiens GN=MDH1 PE=1 SV=4 - [MDHC_HUMAN]	58.68	1	33	33	305	48.2	21	43	50.6	22	47	56.29	23	52	56.29	27	51	55.39	28	58	52.1	22	54
Q9GZZ1	N-alpha-acetyltransferase 50 OS=Homo sapiens GN=NAA50 PE=1 SV=1 - [NAA50_HUMAN]	58.58	1	7	7	86	58.58	7	12	58.58	7	17	58.58	7	17	58.58	7	9	58.58	7	13	58.58	7	18
Q969Q0	60S ribosomal protein L36a-like OS=Homo sapiens GN=RPL36AL PE=1 SV=3 - [RL36L_HUMAN]	58.49	1	2	14	113	44.34	6	15	58.49	12	26	40.57	8	16	58.49	11	21	43.4	7	15	56.6	10	20
P83881	60S ribosomal protein L36a OS=Homo sapiens GN=RPL36A PE=1 SV=2 - [RL36A_HUMAN]	58.49	1	3	15	112	44.34	6	13	58.49	11	24	31.13	7	15	58.49	12	24	43.4	7	14	57.55	11	22
P12236	ADP/ATP translocase 3 OS=Homo sapiens GN=SLC25A6 PE=1 SV=4 - [ADT3_HUMAN]	58.39	3	5	17	96	44.63	8	18	27.85	6	13	39.6	11	18	47.99	11	20	36.91	9	19	27.85	6	8
Q13526	Peptidyl-prolyl cis-trans isomerase NIMA-interacting 1 OS=Homo sapiens GN=PIN1 PE=1 SV=1 - [PIN1_HUMAN]	58.28	1	12	12	103	44.79	7	14	44.79	7	15	49.69	8	15	58.28	12	27	50.92	8	15	57.06	9	17
P62263	40S ribosomal protein S14 OS=Homo sapiens GN=RPS14 PE=1 SV=3 - [RS14_HUMAN]	58.28	1	21	21	264	53.64	18	50	54.3	19	35	53.64	18	48	54.3	20	51	53.64	18	39	57.62	18	41
P30085	UMP-CMP kinase OS=Homo sapiens GN=CMPK1 PE=1 SV=3 - [KCY_HUMAN]	58.16	1	10	10	95	58.16	9	20	51.53	7	11	58.16	9	15	51.53	8	17	51.53	8	16	55.61	8	16
Q02539	Histone H1.1 OS=Homo sapiens GN=HIST1H1A PE=1 SV=3 - [H11_HUMAN]	58.14	2	12	28	435	41.86	21	75	53.49	22	72	36.28	19	70	47.44	23	81	36.28	18	67	49.77	23	70
P25787	Proteasome subunit alpha type-2 OS=Homo sapiens GN=PSMA2 PE=1 SV=2 - [PSA2_HUMAN]	58.12	1	13	13	118	50	10	26	31.2	7	15	55.13	11	20	57.26	12	23	55.13	11	17	55.13	10	17
P68133	Actin, alpha skeletal muscle OS=Homo sapiens GN=ACTA1 PE=1 SV=1 - [ACTS_HUMAN]	58.09	2	1	31	879	42.18	25	143	44.56	28	134	45.09	27	154	52.52	29	167	42.18	25	126	44.56	27	155
Q9Y5L4	Mitochondrial import inner membrane translocase subunit Tim13 OS=Homo sapiens GN=TIMM13 PE=1 SV=1 - [TIM13_HUMAN]	57.89	1	5	5	30	33.68	3	3	41.05	3	7	41.05	3	4	57.89	5	8	41.05	3	6	25.26	2	2
P48047	ATP synthase subunit O, mitochondrial OS=Homo sapiens GN=ATP5O PE=1 SV=1 - [ATPO_HUMAN]	57.75	1	17	17	180	54.93	15	32	54.93	13	28	54.93	15	31	54.93	16	28	54.93	14	36	55.87	13	25
Q9Y2B0	Protein canopy homolog 2 OS=Homo sapiens GN=CNPY2 PE=1 SV=1 - [CNPY2_HUMAN]	57.69	1	10	10	54	25.82	4	6	46.7	7	8	53.3	8	12	48.9	7	11	41.76	6	10	41.76	6	7
Q15004	PCNA-associated factor OS=Homo sapiens GN=KIAA0101 PE=1 SV=1 - [PAF15_HUMAN]	57.66	1	5	5	64	46.85	4	9	46.85	4	10	46.85	4	14	57.66	5	12	46.85	4	8	57.66	5	11
Q16658	Fascin OS=Homo sapiens GN=FSCN1 PE=1 SV=3 - [FSCN1_HUMAN]	57.4	1	33	33	232	37.73	16	32	45.23	20	37	47.67	23	40	49.49	26	49	45.84	21	36	48.68	21	38
Q16555	Dihydropyrimidinase-related protein 2 OS=Homo sapiens GN=DPYSL2 PE=1 SV=1 - [DPYL2_HUMAN]	57.34	1	25	27	190	43.18	21	41	34.09	14	21	41.26	20	33	55.07	20	35	41.96	15	26	38.81	17	34
P08758	Annexin A5 OS=Homo sapiens GN=ANXA5 PE=1 SV=2 - [ANXA5_HUMAN]	57.19	1	15	15	134	38.44	12	23	33.75	10	16	47.19	13	34	57.19	15	24	53.13	14	20	37.81	11	17
P62750	60S ribosomal protein L23a OS=Homo sapiens GN=RPL23A PE=1 SV=1 - [RL23A_HUMAN]	57.05	1	15	16	88	37.18	8	15	42.95	8	11	42.95	9	13	49.36	13	23	44.23	9	17	41.03	7	9
P62987	Ubiquitin-60S ribosomal protein L40 OS=Homo sapiens GN=UBA52 PE=1 SV=2 - [RL40_HUMAN]	57.03	3	5	10	122	50.78	7	21	38.28	6	15	55.47	9	25	42.97	9	25	50.78	8	22	38.28	6	14
P30044	Peroxiredoxin-5, mitochondrial OS=Homo sapiens GN=PRDX5 PE=1 SV=4 - [PRDX5_HUMAN]	57.01	1	16	16	124	45.79	10	23	35.05	5	16	45.79	12	34	56.07	12	16	47.2	12	19	45.79	9	16
P17844	Probable ATP-dependent RNA helicase DDX5 OS=Homo sapiens GN=DDX5 PE=1 SV=1 - [DDX5_HUMAN]	57	1	35	44	331	42.51	33	66	37.13	29	42	46.91	35	64	46.42	36	59	51.14	36	61	34.04	29	39
P12956	X-ray repair cross-complementing protein 6 OS=Homo sapiens GN=XRCC6 PE=1 SV=2 - [XRCC6_HUMAN]	56.98	1	38	38	271	37.93	24	46	37.6	23	42	46.31	27	48	47.45	31	53	35.96	23	43	37.6	20	39
Q16718	NADH dehydrogenase [ubiquinone] 1 alpha subcomplex subunit 5 OS=Homo sapiens GN=NDUFA5 PE=1 SV=3 - [NDUA5_HUMAN]	56.9	1	5	5	56	56.9	5	7	43.97	4	7	56.9	5	10	43.97	4	9	56.9	5	13	43.97	4	10
O43175	D-3-phosphoglycerate dehydrogenase OS=Homo sapiens GN=PHGDH PE=1 SV=4 - [SERA_HUMAN]	56.85	1	31	31	326	45.78	23	50	39.4	21	50	53.85	26	62	51.22	26	62	44.28	22	47	45.03	22	55
Q9NX63	MICOS complex subunit MIC19 OS=Homo sapiens GN=CHCHD3 PE=1 SV=1 - [MIC19_HUMAN]	56.83	1	13	13	93	32.16	6	16	38.33	7	11	38.33	7	12	43.17	9	21	37.44	7	19	37.44	9	14
P52943	Cysteine-rich protein 2 OS=Homo sapiens GN=CRIP2 PE=1 SV=1 - [CRIP2_HUMAN]	56.73	1	8	8	50	50	6	10	50	6	7	43.27	5	7	56.73	8	11	43.27	5	7	50	6	8
Q13347	Eukaryotic translation initiation factor 3 subunit I OS=Homo sapiens GN=EIF3I PE=1 SV=1 - [EIF3I_HUMAN]	56.62	1	15	15	105	44	11	22	40.62	10	16	37.85	10	13	52	13	20	32	9	14	32	9	20
Q56VL3	OCIA domain-containing protein 2 OS=Homo sapiens GN=OCIAD2 PE=1 SV=1 - [OCAD2_HUMAN]	56.49	1	7	7	33	34.42	3	4	7.79	1	2	34.42	3	5	41.56	5	9	56.49	6	9	16.23	2	4
P35080	Profilin-2 OS=Homo sapiens GN=PFN2 PE=1 SV=3 - [PROF2_HUMAN]	56.43	1	15	15	148	56.43	11	17	56.43	9	19	56.43	14	33	56.43	12	27	56.43	11	28	56.43	13	24
Q13151	Heterogeneous nuclear ribonucleoprotein A0 OS=Homo sapiens GN=HNRNPA0 PE=1 SV=1 - [ROA0_HUMAN]	56.39	1	14	14	98	36.72	8	15	40.66	10	14	41.31	10	12	44.59	9	22	49.84	13	19	40.66	9	16
Q9Y265	RuvB-like 1 OS=Homo sapiens GN=RUVBL1 PE=1 SV=1 - [RUVB1_HUMAN]	56.36	1	27	27	214	41.89	17	38	40.57	17	32	55.7	23	48	49.56	20	39	39.69	15	30	43.42	15	27
Q13748	Tubulin alpha-3C/D chain OS=Homo sapiens GN=TUBA3C PE=1 SV=3 - [TBA3C_HUMAN]	56.22	2	3	32	464	56.22	27	78	56.22	26	74	56.22	30	92	51.78	28	75	51.78	26	77	51.78	26	68
P06753	Tropomyosin alpha-3 chain OS=Homo sapiens GN=TPM3 PE=1 SV=2 - [TPM3_HUMAN]	56.14	1	6	27	367	47.02	20	56	47.72	21	56	50.53	21	60	56.14	26	71	48.07	21	56	48.77	22	68
P31939	Bifunctional purine biosynthesis protein PURH OS=Homo sapiens GN=ATIC PE=1 SV=3 - [PUR9_HUMAN]	56.08	1	28	28	193	38.18	17	28	26.35	15	27	46.79	21	34	47.47	23	40	40.88	18	33	37.67	15	31
P84101	Small EDRK-rich factor 2 OS=Homo sapiens GN=SERF2 PE=1 SV=1 - [SERF2_HUMAN]	55.93	1	4	4	24	35.59	2	4	35.59	2	4	35.59	2	3	55.93	4	5	35.59	2	3	37.29	3	5
Q9UHD8	Septin-9 OS=Homo sapiens GN=SEPT9 PE=1 SV=2 - [SEPT9_HUMAN]	55.8	1	33	33	278	36.69	17	47	35.32	19	39	38.74	22	43	47.27	27	48	43	22	52	40.61	20	49
P41567	Eukaryotic translation initiation factor 1 OS=Homo sapiens GN=EIF1 PE=1 SV=1 - [EIF1_HUMAN]	55.75	2	4	4	22	36.28	2	3	36.28	2	2	36.28	2	4	55.75	4	5	36.28	2	5	36.28	2	3
P62072	Mitochondrial import inner membrane translocase subunit Tim10 OS=Homo sapiens GN=TIMM10 PE=1 SV=1 - [TIM10_HUMAN]	55.56	1	4	4	30	55.56	4	6	55.56	3	4	55.56	3	4	55.56	3	4	55.56	4	7	55.56	4	5
Q96B49	Mitochondrial import receptor subunit TOM6 homolog OS=Homo sapiens GN=TOMM6 PE=1 SV=1 - [TOM6_HUMAN]	55.41	1	3	3	23	41.89	2	5	55.41	3	3	41.89	2	4	41.89	2	4	41.89	2	3	41.89	2	4
P62244	40S ribosomal protein S15a OS=Homo sapiens GN=RPS15A PE=1 SV=2 - [RS15A_HUMAN]	55.38	1	9	9	37	35.38	4	5	33.85	4	6	46.15	6	7	29.23	4	4	50	7	10	40.77	5	5
Q15149	Plectin OS=Homo sapiens GN=PLEC PE=1 SV=3 - [PLEC_HUMAN]	55.32	2	307	307	2195	43.74	209	375	40.69	181	300	46.58	214	401	49.83	254	412	44.75	221	369	43.74	203	338
Q13561	Dynactin subunit 2 OS=Homo sapiens GN=DCTN2 PE=1 SV=4 - [DCTN2_HUMAN]	55.11	1	17	17	117	39.9	10	14	36.66	11	18	43.64	13	22	44.89	12	25	41.15	13	24	35.41	11	14
P11021	78 kDa glucose-regulated protein OS=Homo sapiens GN=HSPA5 PE=1 SV=2 - [GRP78_HUMAN]	55.05	1	49	51	689	50.46	39	127	48.47	39	101	49.08	40	114	46.64	41	124	50.92	42	121	48.47	35	102
P55209	Nucleosome assembly protein 1-like 1 OS=Homo sapiens GN=NAP1L1 PE=1 SV=1 - [NP1L1_HUMAN]	54.99	1	22	24	274	43.73	19	41	34.78	20	45	40.66	20	46	44.5	22	50	40.41	19	50	33.25	18	42
P14927	Cytochrome b-c1 complex subunit 7 OS=Homo sapiens GN=UQCRB PE=1 SV=2 - [QCR7_HUMAN]	54.95	1	6	6	34	29.73	4	8	29.73	3	5	20.72	2	3	52.25	5	8	27.03	2	5	38.74	3	5
P41223	Protein BUD31 homolog OS=Homo sapiens GN=BUD31 PE=1 SV=2 - [BUD31_HUMAN]	54.86	1	10	10	89	34.72	6	17	33.33	5	10	33.33	7	11	54.86	9	18	54.86	9	20	34.72	7	13
P50395	Rab GDP dissociation inhibitor beta OS=Homo sapiens GN=GDI2 PE=1 SV=2 - [GDIB_HUMAN]	54.83	1	17	20	169	44.04	15	21	30.56	10	18	54.83	19	43	47.64	17	32	45.39	16	29	37.53	14	26
P55084	Trifunctional enzyme subunit beta, mitochondrial OS=Homo sapiens GN=HADHB PE=1 SV=3 - [ECHB_HUMAN]	54.64	1	21	21	127	46.84	17	25	44.73	12	18	44.51	16	27	42.83	14	21	43.67	13	20	45.99	11	16
P63313	Thymosin beta-10 OS=Homo sapiens GN=TMSB10 PE=1 SV=2 - [TYB10_HUMAN]	54.55	1	3	3	25	31.82	1	4	45.45	2	3	31.82	1	7	40.91	2	4	31.82	1	2	31.82	1	5
Q8WW12	PEST proteolytic signal-containing nuclear protein OS=Homo sapiens GN=PCNP PE=1 SV=2 - [PCNP_HUMAN]	54.49	1	11	11	71	31.46	5	8	40.45	8	12	47.75	8	16	50.56	9	13	40.45	7	9	41.57	7	13
Q04695	Keratin, type I cytoskeletal 17 OS=Homo sapiens GN=KRT17 PE=1 SV=2 - [K1C17_HUMAN]	54.4	5	19	19	144	38.43	13	34	25	7	17	50.23	16	29	34.26	11	19	27.55	8	23	27.78	9	22
P27348	14-3-3 protein theta OS=Homo sapiens GN=YWHAQ PE=1 SV=1 - [1433T_HUMAN]	54.29	1	15	22	204	42.45	16	31	39.59	13	49	51.43	16	34	42.45	18	36	43.67	13	29	39.59	11	25
P06576	ATP synthase subunit beta, mitochondrial OS=Homo sapiens GN=ATP5B PE=1 SV=3 - [ATPB_HUMAN]	54.06	1	26	26	309	44.99	20	48	46.12	19	46	45.75	21	59	44.99	21	61	41.02	17	46	46.12	19	49
P45880	Voltage-dependent anion-selective channel protein 2 OS=Homo sapiens GN=VDAC2 PE=1 SV=2 - [VDAC2_HUMAN]	53.74	1	16	16	144	37.76	12	21	34.01	10	25	51.36	14	30	49.32	13	27	40.14	11	22	38.44	9	19
P18859	ATP synthase-coupling factor 6, mitochondrial OS=Homo sapiens GN=ATP5J PE=1 SV=1 - [ATP5J_HUMAN]	53.7	1	4	4	26	9.26	1	3	36.11	3	5	9.26	1	2	53.7	3	5	22.22	2	6	53.7	3	5
P16403	Histone H1.2 OS=Homo sapiens GN=HIST1H1C PE=1 SV=2 - [H12_HUMAN]	53.52	3	7	35	600	47.89	29	111	51.17	29	98	38.97	27	103	53.05	29	95	38.97	24	91	51.64	31	102
Q9Y3D0	Mitotic spindle-associated MMXD complex subunit MIP18 OS=Homo sapiens GN=FAM96B PE=1 SV=1 - [MIP18_HUMAN]	53.37	1	4	4	32	39.88	3	4	53.37	4	6	53.37	4	6	53.37	4	8	39.88	3	4	39.88	3	4
Q9Y3U8	60S ribosomal protein L36 OS=Homo sapiens GN=RPL36 PE=1 SV=3 - [RL36_HUMAN]	53.33	1	18	18	158	50.48	15	28	44.76	10	27	41.9	12	26	51.43	14	36	41.9	10	23	44.76	12	18
P43487	Ran-specific GTPase-activating protein OS=Homo sapiens GN=RANBP1 PE=1 SV=1 - [RANG_HUMAN]	53.23	1	14	14	146	51.24	13	28	47.26	12	23	47.26	12	22	49.25	12	27	49.75	12	25	45.77	9	21
O95721	Synaptosomal-associated protein 29 OS=Homo sapiens GN=SNAP29 PE=1 SV=1 - [SNP29_HUMAN]	53.1	1	10	10	53	21.32	5	8	25.97	5	8	30.62	5	11	39.92	7	11	23.26	4	7	33.33	7	8
P07305	Histone H1.0 OS=Homo sapiens GN=H1F0 PE=1 SV=3 - [H10_HUMAN]	53.09	1	14	14	121	34.54	9	23	45.36	10	19	47.94	10	17	48.45	12	20	45.36	10	21	45.36	10	21
P34897	Serine hydroxymethyltransferase, mitochondrial OS=Homo sapiens GN=SHMT2 PE=1 SV=3 - [GLYM_HUMAN]	52.98	1	24	24	202	49.8	21	45	40.48	17	26	52.98	21	39	47.62	19	33	40.08	17	29	36.31	16	30
P10412	Histone H1.4 OS=Homo sapiens GN=HIST1H1E PE=1 SV=2 - [H14_HUMAN]	52.97	4	6	35	621	42.47	28	110	47.49	30	109	35.62	27	108	45.66	28	98	35.62	24	94	42.92	30	102
Q15181	Inorganic pyrophosphatase OS=Homo sapiens GN=PPA1 PE=1 SV=2 - [IPYR_HUMAN]	52.94	1	12	12	97	33.91	7	13	31.83	6	14	42.91	9	18	37.72	7	19	47.4	10	19	37.72	7	14
P43686	26S protease regulatory subunit 6B OS=Homo sapiens GN=PSMC4 PE=1 SV=2 - [PRS6B_HUMAN]	52.87	1	16	16	129	39.71	13	23	19.62	8	16	42.82	13	27	41.15	14	29	28.23	10	18	20.33	9	16
P32320	Cytidine deaminase OS=Homo sapiens GN=CDA PE=1 SV=2 - [CDD_HUMAN]	52.74	1	6	6	37	27.4	2	4	37.67	3	7	42.47	3	7	37.67	3	4	34.25	4	8	27.4	2	7
P05386	60S acidic ribosomal protein P1 OS=Homo sapiens GN=RPLP1 PE=1 SV=1 - [RLA1_HUMAN]	52.63	1	3	3	81	52.63	3	14	52.63	3	14	52.63	3	14	52.63	3	14	51.75	2	11	52.63	3	14
P62316	Small nuclear ribonucleoprotein Sm D2 OS=Homo sapiens GN=SNRPD2 PE=1 SV=1 - [SMD2_HUMAN]	52.54	1	7	7	88	27.97	4	10	38.98	6	15	27.97	4	17	52.54	7	17	42.37	6	11	38.98	6	18
Q05639	Elongation factor 1-alpha 2 OS=Homo sapiens GN=EEF1A2 PE=1 SV=1 - [EF1A2_HUMAN]	52.48	1	10	29	372	45.36	23	57	41.9	22	50	47.52	23	71	51.84	25	76	49.03	24	68	44.28	19	50
Q15056	Eukaryotic translation initiation factor 4H OS=Homo sapiens GN=EIF4H PE=1 SV=5 - [IF4H_HUMAN]	52.42	2	14	14	90	28.23	7	15	29.84	8	12	38.71	9	17	33.06	9	13	43.15	10	17	31.85	8	16
O75380	NADH dehydrogenase [ubiquinone] iron-sulfur protein 6, mitochondrial OS=Homo sapiens GN=NDUFS6 PE=1 SV=1 - [NDUS6_HUMAN]	52.42	1	6	6	40	41.13	3	7	52.42	6	6	44.35	4	5	52.42	5	7	52.42	5	7	52.42	6	8
P14174	Macrophage migration inhibitory factor OS=Homo sapiens GN=MIF PE=1 SV=4 - [MIF_HUMAN]	52.17	1	11	11	552	52.17	10	113	52.17	10	118	52.17	9	56	52.17	10	78	52.17	9	101	52.17	10	86
P60983	Glia maturation factor beta OS=Homo sapiens GN=GMFB PE=1 SV=2 - [GMFB_HUMAN]	52.11	1	7	7	67	42.25	5	9	52.11	6	8	52.11	7	13	52.11	7	15	42.25	6	10	42.25	6	12
Q13263	Transcription intermediary factor 1-beta OS=Homo sapiens GN=TRIM28 PE=1 SV=5 - [TIF1B_HUMAN]	51.98	1	36	36	288	34.97	19	41	32.57	21	46	34.97	23	51	40.48	27	53	31.5	19	43	35.45	19	54
P07910	Heterogeneous nuclear ribonucleoproteins C1/C2 OS=Homo sapiens GN=HNRNPC PE=1 SV=4 - [HNRPC_HUMAN]	51.63	1	20	30	436	38.56	24	65	40.2	22	65	44.12	25	76	44.77	25	91	35.62	22	65	35.62	21	74
O43678	NADH dehydrogenase [ubiquinone] 1 alpha subcomplex subunit 2 OS=Homo sapiens GN=NDUFA2 PE=1 SV=3 - [NDUA2_HUMAN]	51.52	1	4	4	26	51.52	4	4	35.35	2	6	35.35	2	4	45.45	3	4	41.41	3	4	35.35	2	4
Q69YL0	Uncharacterized protein NCBP2-AS2 OS=Homo sapiens GN=NCBP2-AS2 PE=4 SV=1 - [NCAS2_HUMAN]	51.52	1	4	4	25	50.51	3	6	50.51	3	4	51.52	4	6	35.35	2	3	50.51	3	3	29.29	2	3
P31942	Heterogeneous nuclear ribonucleoprotein H3 OS=Homo sapiens GN=HNRNPH3 PE=1 SV=2 - [HNRH3_HUMAN]	51.45	3	18	18	173	44.8	15	38	50.58	14	26	34.1	11	22	49.71	13	29	44.8	14	32	43.93	12	26
Q13442	28 kDa heat- and acid-stable phosphoprotein OS=Homo sapiens GN=PDAP1 PE=1 SV=1 - [HAP28_HUMAN]	51.38	1	11	11	65	22.1	3	6	19.89	3	9	44.2	6	9	28.18	6	12	46.96	7	15	43.09	6	14
Q9UK76	Hematological and neurological expressed 1 protein OS=Homo sapiens GN=HN1 PE=1 SV=3 - [HN1_HUMAN]	51.3	1	10	10	189	51.3	9	28	51.3	9	37	51.3	9	36	51.3	10	31	42.86	8	25	51.3	10	32
Q12904	Aminoacyl tRNA synthase complex-interacting multifunctional protein 1 OS=Homo sapiens GN=AIMP1 PE=1 SV=2 - [AIMP1_HUMAN]	51.28	1	12	12	141	39.74	9	26	37.18	8	23	39.74	9	24	48.72	10	27	33.97	7	19	37.18	9	22
Q04760	Lactoylglutathione lyase OS=Homo sapiens GN=GLO1 PE=1 SV=4 - [LGUL_HUMAN]	51.09	1	8	8	59	26.63	5	13	35.87	5	8	35.87	7	12	51.09	7	11	26.63	4	8	35.87	4	7
P62861	40S ribosomal protein S30 OS=Homo sapiens GN=FAU PE=1 SV=1 - [RS30_HUMAN]	50.85	1	6	6	76	20.34	4	17	33.9	4	9	20.34	4	9	37.29	5	16	20.34	3	12	37.29	4	13
P19338	Nucleolin OS=Homo sapiens GN=NCL PE=1 SV=3 - [NUCL_HUMAN]	50.7	1	49	49	476	37.89	30	81	39.3	31	75	39.86	33	82	47.46	38	97	37.89	33	76	35.63	28	65
P61981	14-3-3 protein gamma OS=Homo sapiens GN=YWHAG PE=1 SV=2 - [1433G_HUMAN]	50.61	1	9	22	242	44.53	14	40	46.56	15	39	50.61	20	50	44.53	16	37	48.58	14	35	44.53	15	41
P22087	rRNA 2'-O-methyltransferase fibrillarin OS=Homo sapiens GN=FBL PE=1 SV=2 - [FBRL_HUMAN]	50.47	2	12	12	80	36.45	8	15	29.6	6	9	44.24	10	16	39.88	9	14	36.45	8	17	32.4	7	9
Q9UKM9	RNA-binding protein Raly OS=Homo sapiens GN=RALY PE=1 SV=1 - [RALY_HUMAN]	50.33	1	19	19	162	34.31	12	28	33.01	13	23	33.66	12	32	37.25	15	24	31.37	11	24	34.64	13	31
Q9BUF5	Tubulin beta-6 chain OS=Homo sapiens GN=TUBB6 PE=1 SV=1 - [TBB6_HUMAN]	50.22	1	8	19	370	33.41	16	69	31.17	14	55	43.95	16	69	39.24	17	59	35.65	17	66	32.74	14	52
P50502	Hsc70-interacting protein OS=Homo sapiens GN=ST13 PE=1 SV=2 - [F10A1_HUMAN]	50.14	3	25	25	255	42.55	16	38	33.6	13	32	37.94	18	49	42.55	17	41	37.4	15	45	46.61	20	50
Q9P0M9	39S ribosomal protein L27, mitochondrial OS=Homo sapiens GN=MRPL27 PE=1 SV=1 - [RM27_HUMAN]	50	1	7	7	38	33.78	4	6	29.73	3	5	33.78	4	8	29.73	4	6	29.05	4	5	27.7	4	8
O43920	NADH dehydrogenase [ubiquinone] iron-sulfur protein 5 OS=Homo sapiens GN=NDUFS5 PE=1 SV=3 - [NDUS5_HUMAN]	50	1	4	4	17	34.91	2	6				32.08	2	2	50	4	6	34.91	2	2	16.98	1	1
O96000	NADH dehydrogenase [ubiquinone] 1 beta subcomplex subunit 10 OS=Homo sapiens GN=NDUFB10 PE=1 SV=3 - [NDUBA_HUMAN]	50	1	9	9	62	40.12	5	12	50	6	12	27.91	4	8	45.35	7	10	44.77	7	12	40.12	5	8
Q14011	Cold-inducible RNA-binding protein OS=Homo sapiens GN=CIRBP PE=1 SV=1 - [CIRBP_HUMAN]	50	1	5	5	47	41.86	4	9	41.86	4	7	28.49	3	4	50	5	10	33.72	3	8	41.86	4	9
P62906	60S ribosomal protein L10a OS=Homo sapiens GN=RPL10A PE=1 SV=2 - [RL10A_HUMAN]	49.77	1	15	15	139	41.47	12	25	41.01	10	20	40.09	11	24	35.02	9	22	37.33	10	26	41.01	10	22
Q14315	Filamin-C OS=Homo sapiens GN=FLNC PE=1 SV=3 - [FLNC_HUMAN]	49.69	1	118	131	1058	39.27	89	174	37.72	84	151	40.44	92	191	43.23	105	202	38.61	90	182	36.99	83	158
P41134	DNA-binding protein inhibitor ID-1 OS=Homo sapiens GN=ID1 PE=1 SV=3 - [ID1_HUMAN]	49.68	1	4	4	27	27.1	2	2	41.94	3	6	21.94	2	2	49.68	4	7	21.94	2	7	27.1	2	3
P08865	40S ribosomal protein SA OS=Homo sapiens GN=RPSA PE=1 SV=4 - [RSSA_HUMAN]	49.49	1	18	18	239	47.12	16	35	44.41	13	35	47.12	16	39	47.12	14	44	47.12	15	40	49.49	16	46
P05141	ADP/ATP translocase 2 OS=Homo sapiens GN=SLC25A5 PE=1 SV=7 - [ADT2_HUMAN]	49.33	2	9	21	165	45.97	11	24	45.97	11	24	49.33	17	39	45.64	13	30	38.93	13	29	45.97	10	19
O15371	Eukaryotic translation initiation factor 3 subunit D OS=Homo sapiens GN=EIF3D PE=1 SV=1 - [EIF3D_HUMAN]	49.27	1	23	23	194	37.96	13	35	28.1	10	21	38.32	15	33	44.53	18	42	33.21	15	32	39.6	14	31
Q9NRX2	39S ribosomal protein L17, mitochondrial OS=Homo sapiens GN=MRPL17 PE=1 SV=1 - [RM17_HUMAN]	49.14	1	6	6	27	23.43	3	8	16	2	3	16	2	3	38.86	5	5	10.29	1	1	26.29	3	7
P30043	Flavin reductase (NADPH) OS=Homo sapiens GN=BLVRB PE=1 SV=3 - [BLVRB_HUMAN]	49.03	1	10	10	116	41.75	6	15	22.33	4	20	47.09	7	21	46.6	7	20	32.52	6	20	28.64	6	20
P56381	ATP synthase subunit epsilon, mitochondrial OS=Homo sapiens GN=ATP5E PE=1 SV=2 - [ATP5E_HUMAN]	49.02	2	4	4	26	29.41	3	5	29.41	3	5	29.41	2	4	29.41	1	3	49.02	3	5	29.41	2	4
P62841	40S ribosomal protein S15 OS=Homo sapiens GN=RPS15 PE=1 SV=2 - [RS15_HUMAN]	48.97	1	10	10	60	39.31	7	15	20.69	3	5	40	4	6	26.21	6	10	29.66	5	11	26.21	7	13
P05388	60S acidic ribosomal protein P0 OS=Homo sapiens GN=RPLP0 PE=1 SV=1 - [RLA0_HUMAN]	48.9	2	19	19	156	37.85	15	24	37.85	12	21	48.9	17	33	48.9	16	30	48.9	16	28	34.7	11	20
P49721	Proteasome subunit beta type-2 OS=Homo sapiens GN=PSMB2 PE=1 SV=1 - [PSB2_HUMAN]	48.76	1	9	9	36	41.29	5	5	17.91	3	3	38.31	6	7	35.82	6	6	35.82	6	9	24.88	4	6
P61758	Prefoldin subunit 3 OS=Homo sapiens GN=VBP1 PE=1 SV=3 - [PFD3_HUMAN]	48.73	1	10	10	52	30.46	4	8	36.04	5	6	43.15	7	10	40.61	7	10	35.53	5	9	40.61	6	9
O60888	Protein CutA OS=Homo sapiens GN=CUTA PE=1 SV=2 - [CUTA_HUMAN]	48.6	1	5	5	42	40.78	4	7	22.91	2	5	48.6	5	9	40.78	4	9	22.91	2	5	30.73	3	7
P22061	Protein-L-isoaspartate(D-aspartate) O-methyltransferase OS=Homo sapiens GN=PCMT1 PE=1 SV=4 - [PIMT_HUMAN]	48.46	1	5	5	57	48.46	5	9	48.46	5	9	48.46	5	9	48.46	5	12	48.46	5	9	48.46	5	9
Q9NPE3	H/ACA ribonucleoprotein complex subunit 3 OS=Homo sapiens GN=NOP10 PE=1 SV=1 - [NOP10_HUMAN]	48.44	1	3	3	40	48.44	3	9	48.44	3	5	48.44	3	7	48.44	3	7	48.44	3	7	48.44	3	5
P98179	RNA-binding protein 3 OS=Homo sapiens GN=RBM3 PE=1 SV=1 - [RBM3_HUMAN]	48.41	1	10	10	170	46.5	8	29	46.5	8	28	46.5	8	28	48.41	10	29	46.5	8	32	46.5	8	24
Q13126	S-methyl-5'-thioadenosine phosphorylase OS=Homo sapiens GN=MTAP PE=1 SV=2 - [MTAP_HUMAN]	48.41	1	9	9	32	11.31	2	4	11.31	2	2	30.39	5	6	36.04	6	9	34.63	7	8	11.31	2	3
P31943	Heterogeneous nuclear ribonucleoprotein H OS=Homo sapiens GN=HNRNPH1 PE=1 SV=4 - [HNRH1_HUMAN]	48.33	1	16	26	250	33.41	18	44	37.64	18	34	36.3	21	39	44.1	24	42	45.43	23	49	36.3	20	42
Q9Y5J7	Mitochondrial import inner membrane translocase subunit Tim9 OS=Homo sapiens GN=TIMM9 PE=1 SV=1 - [TIM9_HUMAN]	48.31	1	4	4	47	48.31	4	9	48.31	4	5	48.31	4	6	43.82	3	12	48.31	4	8	48.31	4	7
P82921	28S ribosomal protein S21, mitochondrial OS=Homo sapiens GN=MRPS21 PE=1 SV=2 - [RT21_HUMAN]	48.28	1	4	4	22	20.69	2	3	20.69	2	3	31.03	3	5	37.93	3	4	37.93	3	4	20.69	2	3
P12268	Inosine-5'-monophosphate dehydrogenase 2 OS=Homo sapiens GN=IMPDH2 PE=1 SV=2 - [IMDH2_HUMAN]	48.25	1	25	25	219	43.19	18	37	28.4	15	26	44.94	21	51	42.8	19	43	41.25	18	38	29.57	15	24
P29401	Transketolase OS=Homo sapiens GN=TKT PE=1 SV=3 - [TKT_HUMAN]	48.15	2	33	33	335	43.34	25	55	40.29	24	56	47.19	28	64	42.38	26	58	40.45	21	53	34.51	21	49
Q8WUW1	Protein BRICK1 OS=Homo sapiens GN=BRK1 PE=1 SV=1 - [BRK1_HUMAN]	48	1	5	5	52	48	5	9	48	5	8	48	5	9	48	5	8	48	5	11	48	5	7
P14625	Endoplasmin OS=Homo sapiens GN=HSP90B1 PE=1 SV=1 - [ENPL_HUMAN]	47.82	3	43	47	409	40.1	31	70	39.85	29	63	44.58	40	80	42.22	32	75	39.1	31	71	38.11	27	50
P30086	Phosphatidylethanolamine-binding protein 1 OS=Homo sapiens GN=PEBP1 PE=1 SV=3 - [PEBP1_HUMAN]	47.59	1	8	8	36	28.34	3	4	16.04	2	4	30.48	5	9	47.59	6	9	33.16	4	5	34.76	4	5
P30084	Enoyl-CoA hydratase, mitochondrial OS=Homo sapiens GN=ECHS1 PE=1 SV=4 - [ECHM_HUMAN]	47.59	1	13	13	105	40.34	11	19	34.14	9	15	40.34	11	19	41.38	12	21	34.14	10	14	34.14	10	17
Q9UK45	U6 snRNA-associated Sm-like protein LSm7 OS=Homo sapiens GN=LSM7 PE=1 SV=1 - [LSM7_HUMAN]	47.57	1	5	5	39	47.57	4	6	39.81	3	6	47.57	4	9	39.81	3	7	47.57	4	6	39.81	3	5
P38117	Electron transfer flavoprotein subunit beta OS=Homo sapiens GN=ETFB PE=1 SV=3 - [ETFB_HUMAN]	47.45	1	12	12	106	40	10	20	29.8	8	17	36.47	10	16	32.16	8	16	33.73	9	19	29.8	8	18
P41227	N-alpha-acetyltransferase 10 OS=Homo sapiens GN=NAA10 PE=1 SV=1 - [NAA10_HUMAN]	47.23	2	10	10	69	46.38	8	14	33.62	5	9	46.81	7	15	42.13	7	12	33.62	5	9	34.04	6	10
P40939	Trifunctional enzyme subunit alpha, mitochondrial OS=Homo sapiens GN=HADHA PE=1 SV=2 - [ECHA_HUMAN]	47.18	1	26	26	164	30.54	16	23	24.64	12	22	36.83	19	37	39.19	21	35	36.04	18	25	26.21	13	22
P23919	Thymidylate kinase OS=Homo sapiens GN=DTYMK PE=1 SV=4 - [KTHY_HUMAN]	47.17	1	11	11	77	40.09	9	13	36.79	8	14	47.17	8	13	47.17	11	13	37.74	8	13	44.34	9	11
P34932	Heat shock 70 kDa protein 4 OS=Homo sapiens GN=HSPA4 PE=1 SV=4 - [HSP74_HUMAN]	47.14	1	39	42	371	41.31	30	55	37.86	28	58	40.6	33	79	41.31	34	69	39.17	32	54	32.26	27	56
P51452	Dual specificity protein phosphatase 3 OS=Homo sapiens GN=DUSP3 PE=1 SV=1 - [DUS3_HUMAN]	47.03	1	9	9	68	31.89	5	8	33.51	4	8	33.51	7	15	38.92	5	13	47.03	7	15	33.51	4	9
P30626	Sorcin OS=Homo sapiens GN=SRI PE=1 SV=1 - [SORCN_HUMAN]	46.97	1	7	7	51	32.32	5	13	32.32	4	6	32.32	5	8	46.97	6	9	41.41	6	10	37.37	4	5
Q13838	Spliceosome RNA helicase DDX39B OS=Homo sapiens GN=DDX39B PE=1 SV=1 - [DX39B_HUMAN]	46.96	1	5	19	153	26.4	14	24	27.8	15	22	39.49	17	26	39.72	16	32	26.17	14	26	34.58	14	23
Q14847	LIM and SH3 domain protein 1 OS=Homo sapiens GN=LASP1 PE=1 SV=2 - [LASP1_HUMAN]	46.74	1	13	13	104	39.85	9	16	39.85	10	16	34.1	9	24	45.59	12	19	36.02	10	16	34.1	8	13
P60842	Eukaryotic initiation factor 4A-I OS=Homo sapiens GN=EIF4A1 PE=1 SV=1 - [IF4A1_HUMAN]	46.55	1	6	15	208	43.35	12	35	33	9	27	46.55	13	44	43.35	10	39	41.38	12	32	34.24	10	31
P52907	F-actin-capping protein subunit alpha-1 OS=Homo sapiens GN=CAPZA1 PE=1 SV=3 - [CAZA1_HUMAN]	46.5	1	6	11	95	33.57	9	16	30.77	7	14	33.57	8	16	42.66	10	17	46.5	10	18	30.77	8	14
P50402	Emerin OS=Homo sapiens GN=EMD PE=1 SV=1 - [EMD_HUMAN]	46.46	1	13	13	127	46.46	12	22	44.88	9	23	45.28	10	22	46.46	12	20	38.58	10	18	38.58	10	22
P42677	40S ribosomal protein S27 OS=Homo sapiens GN=RPS27 PE=1 SV=3 - [RS27_HUMAN]	46.43	1	1	8	83	29.76	6	12	30.95	7	16	30.95	6	15	46.43	7	15	30.95	6	11	46.43	8	14
Q71UM5	40S ribosomal protein S27-like OS=Homo sapiens GN=RPS27L PE=1 SV=3 - [RS27L_HUMAN]	46.43	1	1	8	84	29.76	6	12	30.95	7	16	46.43	7	16	46.43	7	13	46.43	7	13	46.43	8	14
O95865	N(G),N(G)-dimethylarginine dimethylaminohydrolase 2 OS=Homo sapiens GN=DDAH2 PE=1 SV=1 - [DDAH2_HUMAN]	46.32	1	7	7	46	22.11	4	5	19.65	3	5	41.4	6	13	36.14	6	12	19.65	3	5	22.11	4	6
Q15366	Poly(rC)-binding protein 2 OS=Homo sapiens GN=PCBP2 PE=1 SV=1 - [PCBP2_HUMAN]	46.3	1	12	18	210	43.29	14	30	43.29	15	33	41.64	14	38	38.63	13	34	38.63	15	36	38.63	14	39
P62312	U6 snRNA-associated Sm-like protein LSm6 OS=Homo sapiens GN=LSM6 PE=1 SV=1 - [LSM6_HUMAN]	46.25	1	3	3	9										46.25	3	5	37.5	2	3	15	1	1
P29279	Connective tissue growth factor OS=Homo sapiens GN=CTGF PE=1 SV=2 - [CTGF_HUMAN]	46.13	1	12	12	86	32.95	9	16	32.95	8	11	27.51	8	13	43.27	11	17	36.1	10	16	41.55	10	13
Q9UKK9	ADP-sugar pyrophosphatase OS=Homo sapiens GN=NUDT5 PE=1 SV=1 - [NUDT5_HUMAN]	46.12	1	11	11	70	46.12	8	9	46.12	9	11	46.12	9	14	37.9	6	12	42.92	7	14	37.9	6	10
P16989	Y-box-binding protein 3 OS=Homo sapiens GN=YBX3 PE=1 SV=4 - [YBOX3_HUMAN]	45.97	2	9	19	164	26.88	9	28	31.18	11	27	26.61	10	25	33.33	13	27	36.56	14	32	31.99	10	25
P12074	Cytochrome c oxidase subunit 6A1, mitochondrial OS=Homo sapiens GN=COX6A1 PE=1 SV=4 - [CX6A1_HUMAN]	45.87	1	2	2	11	19.27	1	2	26.61	1	1	45.87	2	2	26.61	1	2	45.87	2	3	26.61	1	1
O76021	Ribosomal L1 domain-containing protein 1 OS=Homo sapiens GN=RSL1D1 PE=1 SV=3 - [RL1D1_HUMAN]	45.71	1	23	23	176	31.84	14	24	38.78	17	22	35.71	16	38	37.14	15	27	37.76	17	36	41.63	18	29
P14866	Heterogeneous nuclear ribonucleoprotein L OS=Homo sapiens GN=HNRNPL PE=1 SV=2 - [HNRPL_HUMAN]	45.67	1	29	29	296	37.69	22	53	44.31	22	51	37.69	24	43	39.39	23	39	39.05	25	61	42.44	20	49
Q9UBE0	SUMO-activating enzyme subunit 1 OS=Homo sapiens GN=SAE1 PE=1 SV=1 - [SAE1_HUMAN]	45.66	1	12	12	37	10.69	2	2	14.16	3	4	38.44	8	14	21.1	6	7	21.68	5	7	10.4	3	3
P30041	Peroxiredoxin-6 OS=Homo sapiens GN=PRDX6 PE=1 SV=3 - [PRDX6_HUMAN]	45.54	1	13	13	85	32.14	7	17	31.25	8	11	32.14	9	14	44.64	10	21	27.68	7	11	31.25	7	11
P23193	Transcription elongation factor A protein 1 OS=Homo sapiens GN=TCEA1 PE=1 SV=2 - [TCEA1_HUMAN]	45.51	2	19	19	127	35.22	11	21	39.53	11	19	35.22	11	19	37.21	16	25	44.85	15	18	44.19	13	25
P55145	Mesencephalic astrocyte-derived neurotrophic factor OS=Homo sapiens GN=MANF PE=1 SV=3 - [MANF_HUMAN]	45.05	1	5	5	29	19.23	2	3	26.92	3	5	37.36	4	6	30.22	3	7	37.91	4	4	37.91	4	4
Q09666	Neuroblast differentiation-associated protein AHNAK OS=Homo sapiens GN=AHNAK PE=1 SV=2 - [AHNK_HUMAN]	44.99	1	113	113	1134	26.76	64	175	24.63	62	148	32.92	72	195	36.04	89	244	35.96	80	181	32.48	78	191
P39687	Acidic leucine-rich nuclear phosphoprotein 32 family member A OS=Homo sapiens GN=ANP32A PE=1 SV=1 - [AN32A_HUMAN]	44.98	1	7	11	95	38.96	9	17	25.3	7	11	30.92	8	14	44.98	9	15	44.98	11	22	38.96	9	16
P12814	Alpha-actinin-1 OS=Homo sapiens GN=ACTN1 PE=1 SV=2 - [ACTN1_HUMAN]	44.96	2	25	42	413	30.16	26	66	19.28	21	62	30.94	27	68	41.37	36	81	33.07	29	71	27.47	24	65
O43707	Alpha-actinin-4 OS=Homo sapiens GN=ACTN4 PE=1 SV=2 - [ACTN4_HUMAN]	44.9	3	21	38	459	29.86	26	67	26.13	23	69	33.92	29	78	38.31	33	92	33.92	30	80	26.45	24	73
P18206	Vinculin OS=Homo sapiens GN=VCL PE=1 SV=4 - [VINC_HUMAN]	44.89	1	40	40	289	35.1	28	47	27.07	22	34	39.07	32	53	38.71	34	61	37.04	29	53	30.16	25	41
P31689	DnaJ homolog subfamily A member 1 OS=Homo sapiens GN=DNAJA1 PE=1 SV=2 - [DNJA1_HUMAN]	44.84	1	18	18	110	43.58	12	17	19.9	6	10	42.82	11	15	42.82	14	24	35.52	12	22	33.75	13	22
Q92945	Far upstream element-binding protein 2 OS=Homo sapiens GN=KHSRP PE=1 SV=4 - [FUBP2_HUMAN]	44.73	1	29	34	330	33.9	22	46	33.33	23	48	34.32	25	60	40.65	28	70	36.85	27	58	31.5	22	48
P25705	ATP synthase subunit alpha, mitochondrial OS=Homo sapiens GN=ATP5A1 PE=1 SV=1 - [ATPA_HUMAN]	44.67	1	28	28	227	35.8	21	41	31.83	18	27	38.16	23	45	41.59	21	37	32.55	17	37	32.91	19	40
Q92522	Histone H1x OS=Homo sapiens GN=H1FX PE=1 SV=1 - [H1X_HUMAN]	44.6	1	14	14	88	43.66	11	17	43.66	11	13	43.66	12	15	44.6	13	21	35.68	10	10	42.25	12	12
P61769	Beta-2-microglobulin OS=Homo sapiens GN=B2M PE=1 SV=1 - [B2MG_HUMAN]	44.54	1	4	4	34	36.13	3	5	29.41	2	5	36.13	3	9	44.54	4	8	36.13	3	4	29.41	2	3
P62318	Small nuclear ribonucleoprotein Sm D3 OS=Homo sapiens GN=SNRPD3 PE=1 SV=1 - [SMD3_HUMAN]	44.44	1	10	10	127	39.68	8	18	26.19	8	24	44.44	10	23	44.44	7	19	44.44	9	23	44.44	8	20
O00479	High mobility group nucleosome-binding domain-containing protein 4 OS=Homo sapiens GN=HMGN4 PE=1 SV=3 - [HMGN4_HUMAN]	44.44	1	2	3	25	18.89	1	3	27.78	2	3	35.56	2	4	44.44	3	7	35.56	2	5	44.44	3	3
P00374	Dihydrofolate reductase OS=Homo sapiens GN=DHFR PE=1 SV=2 - [DYR_HUMAN]	44.39	1	6	6	21	28.34	3	4	19.79	2	2	17.65	2	2	35.83	4	5	17.65	2	3	28.34	3	5
Q14019	Coactosin-like protein OS=Homo sapiens GN=COTL1 PE=1 SV=3 - [COTL1_HUMAN]	44.37	1	6	6	68	31.69	4	15	19.72	2	8	31.69	4	13	44.37	5	14	31.69	3	9	31.69	3	9
Q9NRP2	COX assembly mitochondrial protein 2 homolog OS=Homo sapiens GN=CMC2 PE=1 SV=1 - [COXM2_HUMAN]	44.3	1	4	4	18	30.38	2	3	30.38	2	2	32.91	3	3	30.38	2	4	30.38	2	2	41.77	3	4
P82979	SAP domain-containing ribonucleoprotein OS=Homo sapiens GN=SARNP PE=1 SV=3 - [SARNP_HUMAN]	44.29	1	14	14	94	34.76	9	17	36.67	10	13	41.43	10	14	42.38	10	17	36.19	11	19	41.43	11	14
Q13509	Tubulin beta-3 chain OS=Homo sapiens GN=TUBB3 PE=1 SV=2 - [TBB3_HUMAN]	44.22	1	3	25	505	39.33	20	89	39.33	20	77	40.67	22	97	42.67	22	79	41.56	22	85	40.67	18	78
P49915	GMP synthase [glutamine-hydrolyzing] OS=Homo sapiens GN=GMPS PE=1 SV=1 - [GUAA_HUMAN]	44.16	1	16	16	126	33.62	12	20	20.2	7	12	37.81	14	27	41.27	15	23	30.59	12	24	34.34	12	20
P62826	GTP-binding nuclear protein Ran OS=Homo sapiens GN=RAN PE=1 SV=3 - [RAN_HUMAN]	43.98	1	20	20	233	33.33	13	33	33.33	14	34	33.33	15	33	43.98	18	39	41.2	13	50	28.24	14	44
Q12849	G-rich sequence factor 1 OS=Homo sapiens GN=GRSF1 PE=1 SV=3 - [GRSF1_HUMAN]	43.96	1	16	16	124	30	10	20	30	11	17	33.75	10	19	43.96	16	28	36.67	12	19	35.21	11	21
Q9NRV9	Heme-binding protein 1 OS=Homo sapiens GN=HEBP1 PE=1 SV=1 - [HEBP1_HUMAN]	43.92	1	7	7	34	18.52	4	4	14.29	3	3	26.46	5	8	31.22	3	5	22.22	4	7	26.98	5	7
Q9Y383	Putative RNA-binding protein Luc7-like 2 OS=Homo sapiens GN=LUC7L2 PE=1 SV=2 - [LC7L2_HUMAN]	43.88	1	11	14	79	22.19	7	9	21.43	7	9	33.42	10	14	34.69	11	18	30.36	9	11	28.57	11	18
O75607	Nucleoplasmin-3 OS=Homo sapiens GN=NPM3 PE=1 SV=3 - [NPM3_HUMAN]	43.82	1	6	6	67	43.82	5	13	37.64	3	6	43.82	5	12	43.82	5	16	27.53	5	9	43.82	6	11
Q9UKY7	Protein CDV3 homolog OS=Homo sapiens GN=CDV3 PE=1 SV=1 - [CDV3_HUMAN]	43.8	1	4	4	52	43.8	4	12	43.8	4	8	43.8	4	6	31.4	3	7	43.8	4	13	43.8	4	6
Q01518	Adenylyl cyclase-associated protein 1 OS=Homo sapiens GN=CAP1 PE=1 SV=5 - [CAP1_HUMAN]	43.79	1	24	24	189	36.42	19	32	36.42	17	24	41.26	19	30	36.42	21	35	43.79	21	41	36.42	19	27
Q6P587	Acylpyruvase FAHD1, mitochondrial OS=Homo sapiens GN=FAHD1 PE=1 SV=2 - [FAHD1_HUMAN]	43.75	1	5	5	32	36.61	4	7	26.34	3	5	26.34	3	5	33.48	4	6	26.34	3	6	26.34	3	3
Q7Z7F7	39S ribosomal protein L55, mitochondrial OS=Homo sapiens GN=MRPL55 PE=1 SV=1 - [RM55_HUMAN]	43.75	1	6	6	23	26.56	3	4	18.75	2	2	32.03	4	5	42.97	4	6	37.5	4	4	25.78	2	2
P09455	Retinol-binding protein 1 OS=Homo sapiens GN=RBP1 PE=1 SV=2 - [RET1_HUMAN]	43.7	1	4	4	20	16.3	2	2	8.89	1	1	31.85	3	4	43.7	4	6	16.3	2	3	16.3	2	4
Q07065	Cytoskeleton-associated protein 4 OS=Homo sapiens GN=CKAP4 PE=1 SV=2 - [CKAP4_HUMAN]	43.69	1	23	23	214	34.88	15	42	33.72	15	29	36.88	18	37	43.69	21	43	33.72	16	32	40.37	18	31
Q14103	Heterogeneous nuclear ribonucleoprotein D0 OS=Homo sapiens GN=HNRNPD PE=1 SV=1 - [HNRPD_HUMAN]	43.66	1	21	23	236	31.83	16	39	26.76	12	28	31.83	17	41	41.41	20	50	34.93	19	42	30.42	13	36
P33316	Deoxyuridine 5'-triphosphate nucleotidohydrolase, mitochondrial OS=Homo sapiens GN=DUT PE=1 SV=4 - [DUT_HUMAN]	43.65	1	13	13	183	40.87	9	28	40.87	11	26	43.65	12	36	40.87	10	31	40.87	10	33	40.87	11	29
Q13283	Ras GTPase-activating protein-binding protein 1 OS=Homo sapiens GN=G3BP1 PE=1 SV=1 - [G3BP1_HUMAN]	43.35	1	16	19	156	33.69	13	22	41.42	14	29	41.42	16	31	42.92	15	26	37.77	13	25	42.92	14	23
Q96AG4	Leucine-rich repeat-containing protein 59 OS=Homo sapiens GN=LRRC59 PE=1 SV=1 - [LRC59_HUMAN]	43.32	1	15	15	155	40.07	12	24	35.5	11	23	35.5	12	27	43.32	15	33	40.07	13	24	32.25	11	24
P49321	Nuclear autoantigenic sperm protein OS=Homo sapiens GN=NASP PE=1 SV=2 - [NASP_HUMAN]	43.27	1	20	20	131	25.25	12	24	19.16	10	12	34.01	16	25	41.62	17	27	21.7	13	22	35.41	15	21
Q14197	Peptidyl-tRNA hydrolase ICT1, mitochondrial OS=Homo sapiens GN=ICT1 PE=1 SV=1 - [ICT1_HUMAN]	43.2	1	7	7	33	25.24	3	4	37.86	5	7	37.86	5	5	35.44	5	6	33.01	5	5	37.86	5	6
Q9Y3A5	Ribosome maturation protein SBDS OS=Homo sapiens GN=SBDS PE=1 SV=4 - [SBDS_HUMAN]	43.2	1	7	7	25	10.4	2	4	19.2	3	3	23.6	3	3	28.4	5	8	19.2	3	3	10.4	3	4
Q32P51	Heterogeneous nuclear ribonucleoprotein A1-like 2 OS=Homo sapiens GN=HNRNPA1L2 PE=2 SV=2 - [RA1L2_HUMAN]	43.13	1	1	19	223	40.63	18	42	34.06	15	33	33.75	15	37	36.56	17	41	40.31	16	32	37.81	17	38
O75394	39S ribosomal protein L33, mitochondrial OS=Homo sapiens GN=MRPL33 PE=1 SV=1 - [RM33_HUMAN]	43.08	1	2	2	28	43.08	2	4	43.08	2	7	43.08	2	2	43.08	2	5	43.08	2	3	43.08	2	7
Q9UMX5	Neudesin OS=Homo sapiens GN=NENF PE=1 SV=1 - [NENF_HUMAN]	43.02	1	5	5	43	27.91	3	6	27.91	3	6	43.02	4	12	27.91	3	6	27.91	4	6	43.02	4	7
Q99471	Prefoldin subunit 5 OS=Homo sapiens GN=PFDN5 PE=1 SV=2 - [PFD5_HUMAN]	42.86	1	7	7	49	36.36	5	7	31.17	5	7	42.86	6	10	42.86	6	11	31.17	4	7	29.87	4	7
P13995	Bifunctional methylenetetrahydrofolate dehydrogenase/cyclohydrolase, mitochondrial OS=Homo sapiens GN=MTHFD2 PE=1 SV=2 - [MTDC_HUMAN]	42.86	1	11	11	93	29.43	8	15	36	9	14	42.57	9	18	36	9	17	35.71	8	13	36	9	16
P38159	RNA-binding motif protein, X chromosome OS=Homo sapiens GN=RBMX PE=1 SV=3 - [RBMX_HUMAN]	42.71	3	15	16	78	18.67	6	8	15.35	4	6	21.48	6	11	41.43	14	25	28.64	10	17	22.76	8	11
Q6NZI2	Polymerase I and transcript release factor OS=Homo sapiens GN=PTRF PE=1 SV=1 - [PTRF_HUMAN]	42.56	1	21	21	120	17.69	8	15	18.72	8	16	24.1	10	18	27.95	13	26	34.1	13	22	23.59	12	23
Q96AE4	Far upstream element-binding protein 1 OS=Homo sapiens GN=FUBP1 PE=1 SV=3 - [FUBP1_HUMAN]	42.55	1	19	28	315	31.21	20	48	34.94	20	44	36.49	22	55	29.97	20	54	36.34	23	60	31.52	19	54
Q13242	Serine/arginine-rich splicing factor 9 OS=Homo sapiens GN=SRSF9 PE=1 SV=1 - [SRSF9_HUMAN]	42.53	1	9	10	49	24.89	4	5	29.41	6	9	39.37	7	10	42.53	9	10	32.13	6	10	18.55	4	5
P53582	Methionine aminopeptidase 1 OS=Homo sapiens GN=METAP1 PE=1 SV=2 - [MAP11_HUMAN]	42.49	1	13	13	98	40.41	11	18	31.87	9	15	27.2	9	20	34.72	10	19	26.17	8	9	39.9	11	17
P46060	Ran GTPase-activating protein 1 OS=Homo sapiens GN=RANGAP1 PE=1 SV=1 - [RAGP1_HUMAN]	42.42	1	21	21	121	27.6	14	21	21.64	13	17	29.81	16	20	34.41	18	23	23.68	15	23	27.6	15	17
Q00839	Heterogeneous nuclear ribonucleoprotein U OS=Homo sapiens GN=HNRNPU PE=1 SV=6 - [HNRPU_HUMAN]	42.42	1	38	38	538	32.36	32	91	24.97	27	78	37.94	35	102	33.09	32	96	28.97	31	89	27.39	28	82
P07203	Glutathione peroxidase 1 OS=Homo sapiens GN=GPX1 PE=1 SV=4 - [GPX1_HUMAN]	42.36	1	6	6	27	27.09	3	5	27.09	3	4	37.93	5	6	42.36	5	5	27.09	3	3	27.09	3	4
C9JLW8	Protein FAM195B OS=Homo sapiens GN=FAM195B PE=1 SV=1 - [F195B_HUMAN]	42.27	1	3	3	16	11.34	1	1	11.34	1	3	11.34	1	3	42.27	3	6	11.34	1	2	11.34	1	1
Q9UKD2	mRNA turnover protein 4 homolog OS=Homo sapiens GN=MRTO4 PE=1 SV=2 - [MRT4_HUMAN]	42.26	1	6	6	41	25.1	3	7	17.15	2	6	23.43	3	7	21.34	3	9	31.38	4	8	23.85	3	4
O15347	High mobility group protein B3 OS=Homo sapiens GN=HMGB3 PE=1 SV=4 - [HMGB3_HUMAN]	42	1	8	9	30	7.5	2	4	27.5	4	7	17.5	3	3	12.5	4	6	23	4	6	19	3	4
P61586	Transforming protein RhoA OS=Homo sapiens GN=RHOA PE=1 SV=1 - [RHOA_HUMAN]	41.97	1	4	9	48	27.98	5	9	21.24	4	6	35.23	6	8	29.53	8	10	27.46	6	10	21.24	4	5
O15355	Protein phosphatase 1G OS=Homo sapiens GN=PPM1G PE=1 SV=1 - [PPM1G_HUMAN]	41.94	1	21	21	136	30.04	14	21	19.78	10	13	37	15	22	39.38	19	29	33.52	17	26	33.52	15	25
Q8N983	39S ribosomal protein L43, mitochondrial OS=Homo sapiens GN=MRPL43 PE=1 SV=1 - [RM43_HUMAN]	41.86	1	9	9	48	33.49	4	5	36.74	6	9	34.88	6	11	41.86	7	9	36.74	6	7	36.74	5	7
Q9Y266	Nuclear migration protein nudC OS=Homo sapiens GN=NUDC PE=1 SV=1 - [NUDC_HUMAN]	41.69	1	14	14	97	29.91	11	18	33.23	11	22	38.07	12	19	32.63	10	15	29	9	11	26.59	8	12
Q9NP97	Dynein light chain roadblock-type 1 OS=Homo sapiens GN=DYNLRB1 PE=1 SV=3 - [DLRB1_HUMAN]	41.67	2	4	4	18	16.67	1	2	39.58	2	3	18.75	2	6	39.58	3	3	16.67	1	2	39.58	2	2
Q9Y2Z0	Suppressor of G2 allele of SKP1 homolog OS=Homo sapiens GN=SUGT1 PE=1 SV=3 - [SUGT1_HUMAN]	41.64	1	13	13	101	35.07	8	14	19.73	6	12	35.07	10	17	41.64	11	22	35.34	11	17	31.23	9	19
P26599	Polypyrimidine tract-binding protein 1 OS=Homo sapiens GN=PTBP1 PE=1 SV=1 - [PTBP1_HUMAN]	41.62	1	12	12	79	15.82	6	11	11.49	4	7	37.1	11	23	18.83	6	14	24.11	8	15	16.01	5	9
P30153	Serine/threonine-protein phosphatase 2A 65 kDa regulatory subunit A alpha isoform OS=Homo sapiens GN=PPP2R1A PE=1 SV=4 - [2AAA_HUMAN]	41.6	1	15	19	131	23.94	11	24	21.39	9	16	30.22	16	31	28.52	13	20	34.13	15	22	20.03	11	18
P56556	NADH dehydrogenase [ubiquinone] 1 alpha subcomplex subunit 6 OS=Homo sapiens GN=NDUFA6 PE=1 SV=3 - [NDUA6_HUMAN]	41.56	1	5	5	26	14.29	2	3	20.78	2	2	20.78	2	5	37.66	4	7	31.17	3	4	20.78	2	5
Q9NVS9	Pyridoxine-5'-phosphate oxidase OS=Homo sapiens GN=PNPO PE=1 SV=1 - [PNPO_HUMAN]	41.38	1	9	9	68	41.38	8	12	31.03	5	10	41.38	8	15	41.38	8	13	41.38	7	11	32.95	6	7
Q9HD42	Charged multivesicular body protein 1a OS=Homo sapiens GN=CHMP1A PE=1 SV=1 - [CHM1A_HUMAN]	41.33	1	11	11	52	27.55	6	7	23.98	5	6	35.71	7	12	32.65	8	12	28.57	6	8	23.98	4	7
Q16543	Hsp90 co-chaperone Cdc37 OS=Homo sapiens GN=CDC37 PE=1 SV=1 - [CDC37_HUMAN]	41.27	1	13	13	99	20.63	6	14	19.84	6	12	30.69	8	15	29.63	9	19	33.33	11	18	27.51	8	21
Q9NQT5	Exosome complex component RRP40 OS=Homo sapiens GN=EXOSC3 PE=1 SV=3 - [EXOS3_HUMAN]	41.09	1	5	5	58	41.09	5	12	26.91	3	5	33.45	4	13	33.45	4	8	41.09	5	10	30.91	4	10
P28838	Cytosol aminopeptidase OS=Homo sapiens GN=LAP3 PE=1 SV=3 - [AMPL_HUMAN]	41.04	1	17	17	113	28.71	11	15	33.14	14	19	36.99	15	18	37.38	16	21	33.53	14	23	30.06	12	17
P22234	Multifunctional protein ADE2 OS=Homo sapiens GN=PAICS PE=1 SV=3 - [PUR6_HUMAN]	40.94	1	20	20	177	32.71	15	29	32.71	14	26	37.18	18	35	37.65	18	35	33.88	17	27	32.71	14	25
Q13765	Nascent polypeptide-associated complex subunit alpha OS=Homo sapiens GN=NACA PE=1 SV=1 - [NACA_HUMAN]	40.93	3	13	15	126	40.93	12	21	39.53	10	17	40	12	24	40	12	26	40	12	22	40	9	16
P68036	Ubiquitin-conjugating enzyme E2 L3 OS=Homo sapiens GN=UBE2L3 PE=1 SV=1 - [UB2L3_HUMAN]	40.91	1	5	5	39	16.88	3	7	22.08	4	7	22.08	4	10	35.06	4	6	16.88	3	5	17.53	3	4
P32119	Peroxiredoxin-2 OS=Homo sapiens GN=PRDX2 PE=1 SV=5 - [PRDX2_HUMAN]	40.91	1	10	11	161	40.91	9	23	40.91	8	18	40.91	9	28	40.91	10	32	40.91	10	30	40.91	8	30
Q9Y3D3	28S ribosomal protein S16, mitochondrial OS=Homo sapiens GN=MRPS16 PE=1 SV=1 - [RT16_HUMAN]	40.88	1	4	4	17	31.39	3	6	15.33	1	3	29.93	2	3	24.82	2	4				15.33	1	1
O75367	Core histone macro-H2A.1 OS=Homo sapiens GN=H2AFY PE=1 SV=4 - [H2AY_HUMAN]	40.86	1	8	10	82	17.74	5	11	23.92	5	11	27.69	7	13	40.86	10	24	25.54	7	11	25.54	6	12
Q15050	Ribosome biogenesis regulatory protein homolog OS=Homo sapiens GN=RRS1 PE=1 SV=2 - [RRS1_HUMAN]	40.82	1	11	11	48	18.08	4	5	20.82	5	6	23.56	5	8	25.75	7	8	31.51	8	11	24.66	7	10
Q9Y508	E3 ubiquitin-protein ligase RNF114 OS=Homo sapiens GN=RNF114 PE=1 SV=1 - [RN114_HUMAN]	40.79	1	8	8	27	26.32	5	7	21.49	3	5	31.14	5	6	25.88	4	4	16.67	2	2	18.42	3	3
P23246	Splicing factor, proline- and glutamine-rich OS=Homo sapiens GN=SFPQ PE=1 SV=2 - [SFPQ_HUMAN]	40.74	1	42	44	398	31.82	32	68	27.02	31	63	30.98	34	73	38.33	38	71	32.67	32	67	29.99	30	56
Q6NSH3	Cancer/testis antigen family 45 member A5 OS=Homo sapiens GN=CT45A5 PE=1 SV=1 - [CT455_HUMAN]	40.74	1	2	11	91	35.45	8	16	31.22	7	15	31.22	8	13	40.74	11	18	31.22	7	16	24.34	6	13
P43243	Matrin-3 OS=Homo sapiens GN=MATR3 PE=1 SV=2 - [MATR3_HUMAN]	40.73	1	37	37	293	34.83	26	46	28.22	20	37	35.42	28	56	38.49	34	65	33.06	24	44	34.24	22	45
P49411	Elongation factor Tu, mitochondrial OS=Homo sapiens GN=TUFM PE=1 SV=2 - [EFTU_HUMAN]	40.71	1	22	22	209	36.06	19	39	26.77	17	27	31.64	20	41	34.73	20	34	27.65	18	33	36.06	17	35
Q9UJU6	Drebrin-like protein OS=Homo sapiens GN=DBNL PE=1 SV=1 - [DBNL_HUMAN]	40.7	1	12	12	55	20.47	7	9	15.81	6	10	13.95	5	9	33.95	10	15	15.35	5	6	15.81	6	6
Q00577	Transcriptional activator protein Pur-alpha OS=Homo sapiens GN=PURA PE=1 SV=2 - [PURA_HUMAN]	40.68	1	8	9	70	37.27	7	11	26.09	6	13	30.43	7	10	30.43	8	10	27.02	6	12	30.43	7	14
Q96KB5	Lymphokine-activated killer T-cell-originated protein kinase OS=Homo sapiens GN=PBK PE=1 SV=3 - [TOPK_HUMAN]	40.68	1	14	14	96	32.61	10	18	27.64	10	13	34.16	11	18	29.19	10	19	29.19	10	18	24.53	8	10
Q9UHD1	Cysteine and histidine-rich domain-containing protein 1 OS=Homo sapiens GN=CHORDC1 PE=1 SV=2 - [CHRD1_HUMAN]	40.66	1	13	13	111	28.31	11	25	19.88	9	12	36.14	12	18	40.66	13	19	31.63	11	23	23.8	10	14
P26368	Splicing factor U2AF 65 kDa subunit OS=Homo sapiens GN=U2AF2 PE=1 SV=4 - [U2AF2_HUMAN]	40.63	1	12	12	62	23.16	7	12	10.32	5	7	34.53	8	16	20.42	7	13	16.42	5	9	14.32	5	5
Q9P021	Cysteine-rich PDZ-binding protein OS=Homo sapiens GN=CRIPT PE=1 SV=1 - [CRIPT_HUMAN]	40.59	1	4	4	32	40.59	3	4	40.59	3	4	40.59	3	5	40.59	3	7	40.59	4	6	40.59	4	6
P09104	Gamma-enolase OS=Homo sapiens GN=ENO2 PE=1 SV=3 - [ENOG_HUMAN]	40.55	1	10	20	399	36.87	15	62	35.25	16	64	35.25	16	71	35.02	16	87	38.71	18	63	35.02	14	52
Q7KZF4	Staphylococcal nuclease domain-containing protein 1 OS=Homo sapiens GN=SND1 PE=1 SV=1 - [SND1_HUMAN]	40.55	1	32	32	245	33.08	24	50	25.82	18	33	31.54	24	41	38.13	27	45	33.96	22	39	30.11	18	37
Q9BWF3	RNA-binding protein 4 OS=Homo sapiens GN=RBM4 PE=1 SV=1 - [RBM4_HUMAN]	40.38	1	5	10	55	30.77	8	10	23.63	5	6	25.82	6	9	33.24	7	13	18.13	4	8	23.63	5	9
P47813	Eukaryotic translation initiation factor 1A, X-chromosomal OS=Homo sapiens GN=EIF1AX PE=1 SV=2 - [IF1AX_HUMAN]	40.28	2	6	6	40	20.83	3	6	11.81	2	4	20.83	3	6	20.83	4	10	34.03	5	9	18.06	3	5
O00148	ATP-dependent RNA helicase DDX39A OS=Homo sapiens GN=DDX39A PE=1 SV=2 - [DX39A_HUMAN]	40.28	1	3	17	133	24.82	13	21	21.55	13	19	33.72	15	24	38.88	16	26	26.23	14	24	27.63	12	19
Q16181	Septin-7 OS=Homo sapiens GN=SEPT7 PE=1 SV=2 - [SEPT7_HUMAN]	40.27	1	15	15	110	26.77	10	23	24.94	8	12	30.89	12	18	35.7	13	25	28.15	10	16	31.35	10	16
P62191	26S protease regulatory subunit 4 OS=Homo sapiens GN=PSMC1 PE=1 SV=1 - [PRS4_HUMAN]	40.23	1	14	15	67	20.91	8	10	19.32	6	9	29.55	10	15	32.5	11	14	28.64	10	12	12.73	5	7
O43598	2'-deoxynucleoside 5'-phosphate N-hydrolase 1 OS=Homo sapiens GN=DNPH1 PE=1 SV=1 - [DNPH1_HUMAN]	40.23	1	5	5	20	36.21	3	6	20.11	2	2	20.11	3	3	29.89	2	4	9.77	1	4	9.77	1	1
P61956	Small ubiquitin-related modifier 2 OS=Homo sapiens GN=SUMO2 PE=1 SV=3 - [SUMO2_HUMAN]	40	2	8	10	52	40	7	11	36.84	6	9	40	7	8	40	7	9	40	6	6	40	7	9
Q15185	Prostaglandin E synthase 3 OS=Homo sapiens GN=PTGES3 PE=1 SV=1 - [TEBP_HUMAN]	40	1	9	9	117	38.13	7	18	30.63	7	15	21.88	6	22	30.63	8	27	30.63	8	18	20	5	17
P20674	Cytochrome c oxidase subunit 5A, mitochondrial OS=Homo sapiens GN=COX5A PE=1 SV=2 - [COX5A_HUMAN]	40	1	10	10	128	40	10	29	40	10	17	40	10	26	38	8	22	34.67	7	17	34.67	8	17
Q9NR12	PDZ and LIM domain protein 7 OS=Homo sapiens GN=PDLIM7 PE=1 SV=1 - [PDLI7_HUMAN]	39.82	1	11	11	63	12.69	4	8	17.29	6	13	21.01	6	10	29.32	7	10	19.91	7	11	25.16	7	11
O95182	NADH dehydrogenase [ubiquinone] 1 alpha subcomplex subunit 7 OS=Homo sapiens GN=NDUFA7 PE=1 SV=3 - [NDUA7_HUMAN]	39.82	1	5	5	21	13.27	1	2	13.27	1	1	38.05	3	4	30.09	3	4	38.05	3	6	31.86	3	4
Q9H840	Gem-associated protein 7 OS=Homo sapiens GN=GEMIN7 PE=1 SV=1 - [GEMI7_HUMAN]	39.69	1	2	2	7	14.5	1	1	14.5	1	1	39.69	2	3				14.5	1	1	14.5	1	1
P54105	Methylosome subunit pICln OS=Homo sapiens GN=CLNS1A PE=1 SV=1 - [ICLN_HUMAN]	39.66	1	6	6	56	26.58	5	8	34.18	5	7	34.18	5	10	39.66	6	8	39.66	6	12	39.66	6	11
Q9Y2Q9	28S ribosomal protein S28, mitochondrial OS=Homo sapiens GN=MRPS28 PE=1 SV=1 - [RT28_HUMAN]	39.57	1	5	5	35	19.79	3	6	39.57	5	7	34.22	4	5	34.22	4	5	34.22	4	6	34.22	4	6
P62308	Small nuclear ribonucleoprotein G OS=Homo sapiens GN=SNRPG PE=1 SV=1 - [RUXG_HUMAN]	39.47	2	5	5	17	26.32	2	3	30.26	2	2	26.32	2	3	17.11	1	3	32.89	3	4	28.95	2	2
P28066	Proteasome subunit alpha type-5 OS=Homo sapiens GN=PSMA5 PE=1 SV=3 - [PSA5_HUMAN]	39.42	1	9	9	84	26.14	5	12	28.22	6	13	31.12	7	14	36.51	8	17	29.05	6	16	28.22	5	12
P13489	Ribonuclease inhibitor OS=Homo sapiens GN=RNH1 PE=1 SV=2 - [RINI_HUMAN]	39.26	1	13	13	99	39.26	13	20	24.3	8	8	38.61	11	22	38.61	12	17	38.61	12	19	36.01	10	13
Q9BWD1	Acetyl-CoA acetyltransferase, cytosolic OS=Homo sapiens GN=ACAT2 PE=1 SV=2 - [THIC_HUMAN]	39.04	1	8	8	43	29.22	5	9	28.72	5	7	37.78	7	8	35.77	6	8	28.72	5	6	19.14	3	5
P13693	Translationally-controlled tumor protein OS=Homo sapiens GN=TPT1 PE=1 SV=1 - [TCTP_HUMAN]	38.95	3	8	8	55	34.88	6	10	38.95	6	10	34.88	5	12	31.4	5	6	34.88	5	6	34.88	6	11
P27797	Calreticulin OS=Homo sapiens GN=CALR PE=1 SV=1 - [CALR_HUMAN]	38.85	1	14	14	137	27.34	8	20	13.91	5	13	29.74	11	28	38.85	13	30	31.65	10	26	22.78	8	20
Q8WVJ2	NudC domain-containing protein 2 OS=Homo sapiens GN=NUDCD2 PE=1 SV=1 - [NUDC2_HUMAN]	38.85	1	5	5	18	23.57	2	2	13.38	2	3	23.57	2	3	18.47	3	5	23.57	2	3	10.83	2	2
Q9ULV4	Coronin-1C OS=Homo sapiens GN=CORO1C PE=1 SV=1 - [COR1C_HUMAN]	38.82	1	18	18	109	25.74	12	22	14.56	7	13	24.89	11	21	32.07	11	19	27.85	13	23	15.61	7	11
P26583	High mobility group protein B2 OS=Homo sapiens GN=HMGB2 PE=1 SV=2 - [HMGB2_HUMAN]	38.76	1	5	14	105	31.58	12	16	34.93	11	18	27.75	11	16	27.75	10	18	29.67	9	13	27.75	10	24
Q9UBQ7	Glyoxylate reductase/hydroxypyruvate reductase OS=Homo sapiens GN=GRHPR PE=1 SV=1 - [GRHPR_HUMAN]	38.72	1	8	8	56	29.27	5	10	20.73	5	8	34.45	6	7	28.66	6	17	22.26	4	6	25	6	8
Q8N5L8	Ribonuclease P protein subunit p25-like protein OS=Homo sapiens GN=RPP25L PE=1 SV=1 - [RP25L_HUMAN]	38.65	1	5	5	32	38.65	4	7	23.93	3	5	23.31	3	6	38.65	5	8	23.31	2	2	38.65	4	4
P35249	Replication factor C subunit 4 OS=Homo sapiens GN=RFC4 PE=1 SV=2 - [RFC4_HUMAN]	38.57	1	12	12	89	33.88	8	15	25.34	8	11	33.88	9	19	33.06	9	18	27	8	13	33.88	8	13
P25205	DNA replication licensing factor MCM3 OS=Homo sapiens GN=MCM3 PE=1 SV=3 - [MCM3_HUMAN]	38.49	1	27	27	156	32.43	18	25	26.73	14	22	35.27	22	32	31.93	20	31	30.94	20	27	27.72	15	19
P11413	Glucose-6-phosphate 1-dehydrogenase OS=Homo sapiens GN=G6PD PE=1 SV=4 - [G6PD_HUMAN]	38.45	1	19	19	135	23.5	13	25	22.14	9	16	27.57	14	29	36.89	17	29	24.47	12	22	18.06	7	14
P50995	Annexin A11 OS=Homo sapiens GN=ANXA11 PE=1 SV=1 - [ANX11_HUMAN]	38.42	1	21	21	119	32.87	14	18	31.09	14	18	29.9	15	21	27.33	15	20	33.27	14	22	24.75	11	20
Q9Y3D7	Mitochondrial import inner membrane translocase subunit TIM16 OS=Homo sapiens GN=PAM16 PE=1 SV=2 - [TIM16_HUMAN]	38.4	1	3	3	18	38.4	3	4	8	1	1	38.4	3	5	26.4	2	3	26.4	2	3	26.4	2	2
P55327	Tumor protein D52 OS=Homo sapiens GN=TPD52 PE=1 SV=2 - [TPD52_HUMAN]	38.39	1	6	6	27	33.04	3	3	27.68	2	4	28.13	4	6	33.04	4	5	27.68	3	5	33.04	3	4
Q96C19	EF-hand domain-containing protein D2 OS=Homo sapiens GN=EFHD2 PE=1 SV=1 - [EFHD2_HUMAN]	38.33	1	7	7	40	30.42	4	5	30.42	3	5	38.33	6	8	35.42	5	8	11.25	3	8	30.42	4	6
Q03252	Lamin-B2 OS=Homo sapiens GN=LMNB2 PE=1 SV=3 - [LMNB2_HUMAN]	38.33	1	26	35	236	32.67	24	44	28.5	21	28	32.5	25	40	28.83	25	50	34.33	24	39	35	24	35
Q14061	Cytochrome c oxidase copper chaperone OS=Homo sapiens GN=COX17 PE=1 SV=2 - [COX17_HUMAN]	38.1	1	1	1	1										38.1	1	1
P55795	Heterogeneous nuclear ribonucleoprotein H2 OS=Homo sapiens GN=HNRNPH2 PE=1 SV=1 - [HNRH2_HUMAN]	38.08	1	9	19	171	30.96	15	31	30.96	14	26	33.85	17	26	33.41	16	26	35.19	17	36	33.41	16	26
Q13310	Polyadenylate-binding protein 4 OS=Homo sapiens GN=PABPC4 PE=1 SV=1 - [PABP4_HUMAN]	38.04	1	15	38	271	32.92	30	47	29.04	26	43	31.52	29	52	31.21	29	45	27.8	25	44	26.71	24	40
Q9Y5Y2	Cytosolic Fe-S cluster assembly factor NUBP2 OS=Homo sapiens GN=NUBP2 PE=1 SV=1 - [NUBP2_HUMAN]	38.01	1	5	5	31	32.47	3	5	28.41	3	5	32.47	4	8	38.01	4	6	32.47	3	6	13.65	1	1
Q9Y3B8	Oligoribonuclease, mitochondrial OS=Homo sapiens GN=REXO2 PE=1 SV=3 - [ORN_HUMAN]	37.97	1	12	12	127	33.33	10	21	33.33	9	15	33.33	10	27	33.76	10	24	31.22	9	19	31.22	9	21
Q9BYN0	Sulfiredoxin-1 OS=Homo sapiens GN=SRXN1 PE=1 SV=2 - [SRXN1_HUMAN]	37.96	1	4	4	31	31.39	2	4	11.68	1	2	37.96	4	9	23.36	2	5	23.36	2	3	23.36	2	8
Q9NQ88	Fructose-2,6-bisphosphatase TIGAR OS=Homo sapiens GN=TIGAR PE=1 SV=1 - [TIGAR_HUMAN]	37.78	1	12	12	75	37.04	8	11	32.22	9	10	37.04	8	15	37.04	10	18	37.04	7	9	37.78	7	12
P09661	U2 small nuclear ribonucleoprotein A' OS=Homo sapiens GN=SNRPA1 PE=1 SV=2 - [RU2A_HUMAN]	37.65	1	8	8	93	31.37	5	12	13.33	3	18	31.37	5	13	36.86	6	14	31.37	5	15	23.53	5	21
P62258	14-3-3 protein epsilon OS=Homo sapiens GN=YWHAE PE=1 SV=1 - [1433E_HUMAN]	37.65	1	11	14	134	37.65	8	20	37.65	9	25	37.65	11	19	37.65	11	21	37.65	9	21	37.65	9	28
P63165	Small ubiquitin-related modifier 1 OS=Homo sapiens GN=SUMO1 PE=1 SV=1 - [SUMO1_HUMAN]	37.62	1	4	4	27	29.7	3	5	22.77	2	3	29.7	3	7	30.69	3	5	29.7	3	4	13.86	1	3
Q9NR45	Sialic acid synthase OS=Homo sapiens GN=NANS PE=1 SV=2 - [SIAS_HUMAN]	37.6	1	10	10	46	19.78	5	9	15.6	5	9	19.78	5	6	30.92	8	11	10.86	3	3	16.71	5	8
Q9Y237	Peptidyl-prolyl cis-trans isomerase NIMA-interacting 4 OS=Homo sapiens GN=PIN4 PE=1 SV=1 - [PIN4_HUMAN]	37.4	1	6	6	34	30.53	4	8	22.9	3	5	30.53	4	5	22.9	3	5	30.53	5	6	29.77	4	5
Q8WXX5	DnaJ homolog subfamily C member 9 OS=Homo sapiens GN=DNAJC9 PE=1 SV=1 - [DNJC9_HUMAN]	37.31	1	7	7	33	16.92	2	5	16.92	2	5	31.92	5	6	33.08	4	8	28.46	4	6	24.23	3	3
P00505	Aspartate aminotransferase, mitochondrial OS=Homo sapiens GN=GOT2 PE=1 SV=3 - [AATM_HUMAN]	37.21	1	12	12	48	23.49	6	8	10	2	3	26.28	7	14	25.58	8	10	31.63	8	10	10.7	3	3
P50552	Vasodilator-stimulated phosphoprotein OS=Homo sapiens GN=VASP PE=1 SV=3 - [VASP_HUMAN]	37.11	1	12	12	150	30.53	10	24	30.53	10	28	33.42	11	23	30.53	10	23	34.21	11	20	37.11	12	32
P63167	Dynein light chain 1, cytoplasmic OS=Homo sapiens GN=DYNLL1 PE=1 SV=1 - [DYL1_HUMAN]	37.08	2	2	2	6				24.72	1	1				12.36	1	1	12.36	1	2	12.36	1	2
Q9H773	dCTP pyrophosphatase 1 OS=Homo sapiens GN=DCTPP1 PE=1 SV=1 - [DCTP1_HUMAN]	37.06	1	3	3	26	37.06	3	5	37.06	3	5	37.06	3	3	37.06	3	6	30	2	3	30	2	4
Q9BRX5	DNA replication complex GINS protein PSF3 OS=Homo sapiens GN=GINS3 PE=1 SV=1 - [PSF3_HUMAN]	37.04	1	5	5	51	30.56	4	8	30.56	4	10	30.56	4	10	37.04	5	7	30.56	4	9	19.44	3	7
Q9BZL1	Ubiquitin-like protein 5 OS=Homo sapiens GN=UBL5 PE=1 SV=1 - [UBL5_HUMAN]	36.99	1	3	3	24	36.99	3	6	36.99	2	4	36.99	2	2	35.62	2	5	35.62	2	2	36.99	2	5
P33991	DNA replication licensing factor MCM4 OS=Homo sapiens GN=MCM4 PE=1 SV=5 - [MCM4_HUMAN]	36.96	1	21	21	177	32.1	17	28	27.58	16	23	29.66	17	32	29.08	17	37	32.79	18	31	25.84	15	26
Q9Y5J6	Mitochondrial import inner membrane translocase subunit Tim10 B OS=Homo sapiens GN=TIMM10B PE=1 SV=1 - [T10B_HUMAN]	36.89	1	3	3	32	25.24	2	6	25.24	2	6	25.24	2	3	25.24	2	4	35.92	2	5	25.24	2	8
P35221	Catenin alpha-1 OS=Homo sapiens GN=CTNNA1 PE=1 SV=1 - [CTNA1_HUMAN]	36.87	2	26	26	188	22.08	17	34	22.3	16	34	31.68	18	30	33.89	21	37	28.04	17	30	22.63	15	23
P55036	26S proteasome non-ATPase regulatory subunit 4 OS=Homo sapiens GN=PSMD4 PE=1 SV=1 - [PSMD4_HUMAN]	36.87	2	13	13	142	25.2	8	17	27.59	10	24	31.83	11	25	34.22	11	31	34.48	11	23	34.22	11	22
O00154	Cytosolic acyl coenzyme A thioester hydrolase OS=Homo sapiens GN=ACOT7 PE=1 SV=3 - [BACH_HUMAN]	36.84	1	13	13	107	33.42	10	19	30	10	16	33.42	10	22	35.26	11	20	35	11	17	28.68	9	13
O00233	26S proteasome non-ATPase regulatory subunit 9 OS=Homo sapiens GN=PSMD9 PE=1 SV=3 - [PSMD9_HUMAN]	36.77	1	10	10	54	26.01	8	13	21.97	5	6	21.97	5	8	36.77	6	9	21.97	5	8	21.97	5	10
Q96JY6	PDZ and LIM domain protein 2 OS=Homo sapiens GN=PDLIM2 PE=1 SV=1 - [PDLI2_HUMAN]	36.65	1	13	13	58	20.45	8	9	23.01	6	8	15.91	5	6	34.09	10	12	23.86	7	12	24.43	7	11
P61457	Pterin-4-alpha-carbinolamine dehydratase OS=Homo sapiens GN=PCBD1 PE=1 SV=2 - [PHS_HUMAN]	36.54	1	3	3	25	13.46	1	1	13.46	1	4	23.08	2	3	36.54	3	5	36.54	3	4	36.54	3	8
O60869	Endothelial differentiation-related factor 1 OS=Homo sapiens GN=EDF1 PE=1 SV=1 - [EDF1_HUMAN]	36.49	1	6	6	39	29.05	4	7	24.32	3	6	24.32	3	9	31.08	4	6	24.32	3	3	25	4	8
Q9UNH7	Sorting nexin-6 OS=Homo sapiens GN=SNX6 PE=1 SV=1 - [SNX6_HUMAN]	36.45	1	12	12	56	24.88	7	12	14.53	4	9	20.44	6	7	26.6	9	12	25.37	8	12	11.58	4	4
P33993	DNA replication licensing factor MCM7 OS=Homo sapiens GN=MCM7 PE=1 SV=4 - [MCM7_HUMAN]	36.44	1	19	19	97	20.86	10	19	16.13	8	12	23.37	12	16	27.4	14	22	23.92	12	15	13.77	7	13
Q14195	Dihydropyrimidinase-related protein 3 OS=Homo sapiens GN=DPYSL3 PE=1 SV=1 - [DPYL3_HUMAN]	36.32	1	13	16	75	20.53	8	10	15.96	6	9	21.05	9	12	23.51	10	17	23.16	10	15	20.7	7	12
Q9Y3F4	Serine-threonine kinase receptor-associated protein OS=Homo sapiens GN=STRAP PE=1 SV=1 - [STRAP_HUMAN]	36.29	1	8	8	57	14.29	4	9	14.29	3	9	30.86	6	12	24	5	11	18.57	5	10	18.57	4	6
O00571	ATP-dependent RNA helicase DDX3X OS=Homo sapiens GN=DDX3X PE=1 SV=3 - [DDX3X_HUMAN]	36.25	3	24	25	140	25.38	12	21	19.94	11	14	28.85	16	26	33.53	18	24	23.72	14	28	21.3	11	27
P10768	S-formylglutathione hydrolase OS=Homo sapiens GN=ESD PE=1 SV=2 - [ESTD_HUMAN]	36.17	1	5	5	22	19.5	2	2	19.5	2	3	36.17	5	9	14.54	2	3	6.38	1	3	6.38	1	2
Q15084	Protein disulfide-isomerase A6 OS=Homo sapiens GN=PDIA6 PE=1 SV=1 - [PDIA6_HUMAN]	36.14	1	23	23	142	31.36	13	23	22.05	11	14	31.36	15	31	34.77	18	32	28.18	16	25	22.5	12	17
Q9BY77	Polymerase delta-interacting protein 3 OS=Homo sapiens GN=POLDIP3 PE=1 SV=2 - [PDIP3_HUMAN]	36.1	1	12	12	102	27.79	8	14	29.69	8	19	33.97	10	20	26.84	9	19	33.97	10	14	31.83	10	16
P07438	Metallothionein-1B OS=Homo sapiens GN=MT1B PE=2 SV=1 - [MT1B_HUMAN]	36.07	1	1	1	1										36.07	1	1
Q9NRF9	DNA polymerase epsilon subunit 3 OS=Homo sapiens GN=POLE3 PE=1 SV=1 - [DPOE3_HUMAN]	36.05	1	5	5	49	25.85	2	8	26.53	3	5	36.05	4	12	35.37	4	13	25.85	2	3	35.37	3	8
P61077	Ubiquitin-conjugating enzyme E2 D3 OS=Homo sapiens GN=UBE2D3 PE=1 SV=1 - [UB2D3_HUMAN]	36.05	4	3	3	5	12.24	1	1	7.48	1	1	23.81	2	2	7.48	1	1
Q9UQB8	Brain-specific angiogenesis inhibitor 1-associated protein 2 OS=Homo sapiens GN=BAIAP2 PE=1 SV=1 - [BAIP2_HUMAN]	36.05	1	13	13	63	16.12	6	8	17.57	7	10	24.09	9	12	22.1	8	14	20.29	6	7	19.75	8	12
P06744	Glucose-6-phosphate isomerase OS=Homo sapiens GN=GPI PE=1 SV=4 - [G6PI_HUMAN]	36.02	1	20	20	130	30.11	14	28	22.4	9	21	28.14	15	24	27.96	14	24	25.27	10	15	22.76	9	18
Q9NRX4	14 kDa phosphohistidine phosphatase OS=Homo sapiens GN=PHPT1 PE=1 SV=1 - [PHP14_HUMAN]	36	1	5	5	41	34.4	4	5	34.4	4	7	34.4	4	5	36	5	9	34.4	4	9	34.4	4	6
Q9BRJ2	39S ribosomal protein L45, mitochondrial OS=Homo sapiens GN=MRPL45 PE=1 SV=2 - [RM45_HUMAN]	35.95	1	6	6	26	23.2	4	5	14.38	2	4	19.28	3	3	32.03	5	7	26.47	4	4	14.38	2	3
O00488	Zinc finger protein 593 OS=Homo sapiens GN=ZNF593 PE=1 SV=2 - [ZN593_HUMAN]	35.82	1	4	4	14	23.88	3	4	20.9	2	2	9.7	2	2	20.9	2	2	26.12	2	2	20.9	2	2
Q07955	Serine/arginine-rich splicing factor 1 OS=Homo sapiens GN=SRSF1 PE=1 SV=2 - [SRSF1_HUMAN]	35.48	1	14	15	115	20.56	8	14	20.56	8	15	27.82	9	27	35.48	12	19	23.39	10	19	32.66	13	21
P51858	Hepatoma-derived growth factor OS=Homo sapiens GN=HDGF PE=1 SV=1 - [HDGF_HUMAN]	35.42	1	8	8	51	12.5	4	9	12.5	4	7	30	7	10	25.83	6	8	22.08	6	11	12.5	4	6
P36543	V-type proton ATPase subunit E 1 OS=Homo sapiens GN=ATP6V1E1 PE=1 SV=1 - [VATE1_HUMAN]	35.4	2	9	9	58	27.43	7	11	27.43	6	8	26.99	6	11	30.53	8	11	32.3	7	8	23.89	6	9
P67775	Serine/threonine-protein phosphatase 2A catalytic subunit alpha isoform OS=Homo sapiens GN=PPP2CA PE=1 SV=1 - [PP2AA_HUMAN]	35.28	2	6	6	20	25.89	4	4	14.89	2	3	27.83	4	4	19.74	3	3	14.89	2	3	14.89	2	3
Q9Y4Z0	U6 snRNA-associated Sm-like protein LSm4 OS=Homo sapiens GN=LSM4 PE=1 SV=1 - [LSM4_HUMAN]	35.25	1	4	4	13	10.07	1	1	18.71	2	2	21.58	2	2	26.62	3	5	10.07	1	2	10.07	1	1
P08621	U1 small nuclear ribonucleoprotein 70 kDa OS=Homo sapiens GN=SNRNP70 PE=1 SV=2 - [RU17_HUMAN]	35.24	1	21	21	142	26.54	15	22	25.86	16	26	26.54	15	22	35.24	18	24	32.72	17	26	30.89	16	22
Q8WXC6	Myeloma-overexpressed gene 2 protein OS=Homo sapiens GN=MYEOV2 PE=1 SV=3 - [MYOV2_HUMAN]	35.09	1	1	1	8	35.09	1	1				35.09	1	2	35.09	1	2	35.09	1	1	35.09	1	2
Q9BR76	Coronin-1B OS=Homo sapiens GN=CORO1B PE=1 SV=1 - [COR1B_HUMAN]	34.97	2	11	11	67	10.02	4	7	12.47	5	7	29.04	10	17	23.52	7	13	18.2	7	10	18.81	8	13
P47224	Guanine nucleotide exchange factor MSS4 OS=Homo sapiens GN=RABIF PE=1 SV=2 - [MSS4_HUMAN]	34.96	1	4	4	15	21.95	2	2	29.27	3	4	21.95	2	2	21.95	2	2	21.95	2	4	5.69	1	1
Q8TAD7	Overexpressed in colon carcinoma 1 protein OS=Homo sapiens GN=OCC1 PE=1 SV=2 - [OCC1_HUMAN]	34.92	1	1	1	10	34.92	1	4				34.92	1	1	34.92	1	1	34.92	1	2	34.92	1	2
Q07812	Apoptosis regulator BAX OS=Homo sapiens GN=BAX PE=1 SV=1 - [BAX_HUMAN]	34.9	1	6	6	34	34.9	4	8	23.96	3	3	34.9	6	9	23.96	3	3	34.9	4	4	23.96	3	7
P10606	Cytochrome c oxidase subunit 5B, mitochondrial OS=Homo sapiens GN=COX5B PE=1 SV=2 - [COX5B_HUMAN]	34.88	1	4	4	51	34.88	3	10	34.88	3	6	34.88	3	6	34.88	4	10	34.88	4	11	34.88	3	8
Q96PK6	RNA-binding protein 14 OS=Homo sapiens GN=RBM14 PE=1 SV=2 - [RBM14_HUMAN]	34.83	1	19	19	154	29.45	15	24	30.79	15	23	30.94	15	24	34.83	18	32	29.45	14	24	31.39	16	27
Q9Y3C1	Nucleolar protein 16 OS=Homo sapiens GN=NOP16 PE=1 SV=2 - [NOP16_HUMAN]	34.83	1	5	5	27	26.97	3	4	15.17	3	5	3.93	1	1	24.72	3	5	34.83	4	8	15.17	3	4
P07741	Adenine phosphoribosyltransferase OS=Homo sapiens GN=APRT PE=1 SV=2 - [APT_HUMAN]	34.44	1	6	6	30	18.89	3	5	7.22	1	2	27.22	5	9	27.22	5	8	18.33	2	3	18.33	2	3
O00193	Small acidic protein OS=Homo sapiens GN=SMAP PE=1 SV=1 - [SMAP_HUMAN]	34.43	1	6	6	45	24.04	3	8	19.13	3	5	25.68	4	8	19.13	3	9	26.23	4	7	20.77	4	8
Q9H444	Charged multivesicular body protein 4b OS=Homo sapiens GN=CHMP4B PE=1 SV=1 - [CHM4B_HUMAN]	34.38	2	6	6	41	19.2	2	6	19.2	2	4	26.34	3	8	34.38	6	10	19.2	3	4	29.91	5	9
Q9NWV4	UPF0587 protein C1orf123 OS=Homo sapiens GN=C1orf123 PE=1 SV=1 - [CA123_HUMAN]	34.38	1	3	3	28	21.25	2	5	21.25	2	3	34.38	3	4	21.25	2	4	21.25	2	5	21.25	2	7
O60783	28S ribosomal protein S14, mitochondrial OS=Homo sapiens GN=MRPS14 PE=1 SV=1 - [RT14_HUMAN]	34.38	1	4	4	21	21.88	2	2	21.88	2	3	21.88	2	2	21.88	2	6	34.38	4	6	21.88	2	2
O60506	Heterogeneous nuclear ribonucleoprotein Q OS=Homo sapiens GN=SYNCRIP PE=1 SV=2 - [HNRPQ_HUMAN]	34.35	2	17	25	207	32.74	20	35	26.65	16	24	28.57	21	38	29.7	21	40	27.45	18	31	30.5	17	39
O95571	Persulfide dioxygenase ETHE1, mitochondrial OS=Homo sapiens GN=ETHE1 PE=1 SV=2 - [ETHE1_HUMAN]	34.25	1	7	7	45	30.71	5	5	34.25	6	7	30.71	5	7	34.25	7	10	30.71	6	8	34.25	6	8
Q15654	Thyroid receptor-interacting protein 6 OS=Homo sapiens GN=TRIP6 PE=1 SV=3 - [TRIP6_HUMAN]	34.24	1	10	10	80	29.2	9	14	28.36	8	16	34.24	10	16	30.67	8	12	32.14	8	11	28.36	8	11
Q9NX55	Huntingtin-interacting protein K OS=Homo sapiens GN=HYPK PE=1 SV=2 - [HYPK_HUMAN]	34.11	1	2	2	19	13.95	1	3	13.95	1	2	34.11	2	4	34.11	2	4	13.95	1	2	13.95	1	4
P83916	Chromobox protein homolog 1 OS=Homo sapiens GN=CBX1 PE=1 SV=1 - [CBX1_HUMAN]	34.05	1	6	8	80	28.11	6	10	28.11	6	10	28.11	7	15	28.11	7	15	34.05	8	12	28.11	6	18
Q92841	Probable ATP-dependent RNA helicase DDX17 OS=Homo sapiens GN=DDX17 PE=1 SV=2 - [DDX17_HUMAN]	34.02	1	18	27	232	29.9	21	43	29.63	20	33	27.71	20	37	32.51	22	47	33.88	23	37	30.18	21	35
P67870	Casein kinase II subunit beta OS=Homo sapiens GN=CSNK2B PE=1 SV=1 - [CSK2B_HUMAN]	33.95	1	6	6	32	15.81	2	4	17.21	2	4	23.26	4	9	18.14	3	8	15.81	2	3	14.88	2	4
P45974	Ubiquitin carboxyl-terminal hydrolase 5 OS=Homo sapiens GN=USP5 PE=1 SV=2 - [UBP5_HUMAN]	33.92	1	24	24	181	25.64	16	26	25.17	16	26	27.86	16	32	31.7	21	40	27.74	16	28	21.33	13	29
Q16643	Drebrin OS=Homo sapiens GN=DBN1 PE=1 SV=4 - [DREB_HUMAN]	33.9	1	16	16	137	30.66	11	20	20.03	9	22	25.42	9	21	27.12	12	25	25.42	9	22	27.12	11	27
P13929	Beta-enolase OS=Homo sapiens GN=ENO3 PE=1 SV=5 - [ENOB_HUMAN]	33.87	1	4	14	353	28.57	10	52	27.19	10	55	23.96	9	63	23.5	9	75	32.03	12	59	25.35	9	49
P63000	Ras-related C3 botulinum toxin substrate 1 OS=Homo sapiens GN=RAC1 PE=1 SV=1 - [RAC1_HUMAN]	33.85	5	6	7	50	33.85	6	7	21.35	4	5	29.69	6	11	29.69	6	9	33.85	6	9	25.52	5	9
Q15019	Septin-2 OS=Homo sapiens GN=SEPT2 PE=1 SV=1 - [SEPT2_HUMAN]	33.8	1	9	9	67	27.98	6	9	26.87	7	9	30.75	8	12	29.92	8	12	26.87	7	11	26.87	7	14
Q562R1	Beta-actin-like protein 2 OS=Homo sapiens GN=ACTBL2 PE=1 SV=2 - [ACTBL_HUMAN]	33.78	1	1	13	229	21.54	9	39	17.29	10	40	23.4	11	35	17.29	10	46	22.87	10	31	22.07	10	38
Q9H0B6	Kinesin light chain 2 OS=Homo sapiens GN=KLC2 PE=1 SV=1 - [KLC2_HUMAN]	33.76	1	8	12	51	9.16	3	6	8.52	3	6	17.04	5	7	22.51	8	16	13.34	4	7	13.67	5	9
P62306	Small nuclear ribonucleoprotein F OS=Homo sapiens GN=SNRPF PE=1 SV=1 - [RUXF_HUMAN]	33.72	1	4	4	31	24.42	3	5	24.42	3	4	24.42	3	6	33.72	4	7	24.42	3	6	24.42	3	3
Q9BYN8	28S ribosomal protein S26, mitochondrial OS=Homo sapiens GN=MRPS26 PE=1 SV=1 - [RT26_HUMAN]	33.66	1	5	5	15	14.63	2	2	8.29	1	2	28.78	4	5	10.73	2	2	20	3	3	8.29	1	1
Q99798	Aconitate hydratase, mitochondrial OS=Homo sapiens GN=ACO2 PE=1 SV=2 - [ACON_HUMAN]	33.59	1	18	18	87	19.74	10	16	18.97	10	11	22.05	10	15	26.03	13	19	19.74	10	16	10.64	5	10
Q96G61	Diphosphoinositol polyphosphate phosphohydrolase 3-beta OS=Homo sapiens GN=NUDT11 PE=1 SV=1 - [NUD11_HUMAN]	33.54	2	5	5	24	19.51	2	3	19.51	2	7	6.1	1	2	11.59	2	2	28.05	4	6	19.51	2	4
P25685	DnaJ homolog subfamily B member 1 OS=Homo sapiens GN=DNAJB1 PE=1 SV=4 - [DNJB1_HUMAN]	33.53	1	9	10	74	21.47	8	14	18.53	7	10	30	9	13	25	9	15	18.53	7	11	21.47	8	11
Q01130	Serine/arginine-rich splicing factor 2 OS=Homo sapiens GN=SRSF2 PE=1 SV=4 - [SRSF2_HUMAN]	33.48	1	7	11	60	17.19	5	13	17.65	5	5	23.08	7	17	28.51	9	13	14.48	4	5	23.53	6	7
Q86V81	THO complex subunit 4 OS=Homo sapiens GN=ALYREF PE=1 SV=3 - [THOC4_HUMAN]	33.46	1	8	8	100	29.57	7	17	19.07	6	12	29.57	7	19	33.46	8	20	29.57	6	16	33.46	7	16
Q14240	Eukaryotic initiation factor 4A-II OS=Homo sapiens GN=EIF4A2 PE=1 SV=2 - [IF4A2_HUMAN]	33.42	1	2	11	89	26.78	7	15	19.66	5	11	27.52	8	21	24.32	6	19	18.92	6	11	20.88	6	12
P50897	Palmitoyl-protein thioesterase 1 OS=Homo sapiens GN=PPT1 PE=1 SV=1 - [PPT1_HUMAN]	33.33	1	7	7	32	26.8	5	9	21.24	4	6	10.46	2	2	27.78	5	5	18.3	3	3	25.16	5	7
P19105	Myosin regulatory light chain 12A OS=Homo sapiens GN=MYL12A PE=1 SV=2 - [ML12A_HUMAN]	33.33	2	5	5	47	33.33	4	7	33.33	4	7	33.33	4	6	33.33	5	12	33.33	4	7	33.33	5	8
Q9Y230	RuvB-like 2 OS=Homo sapiens GN=RUVBL2 PE=1 SV=3 - [RUVB2_HUMAN]	33.26	1	18	18	108	22.89	11	19	14.69	10	17	23.11	12	19	22.03	11	19	24.41	10	17	21.6	10	17
Q92598	Heat shock protein 105 kDa OS=Homo sapiens GN=HSPH1 PE=1 SV=1 - [HS105_HUMAN]	33.22	2	29	32	308	29.25	25	52	29.25	22	47	30.89	25	56	30.65	28	63	26.92	23	42	29.72	23	48
Q99729	Heterogeneous nuclear ribonucleoprotein A/B OS=Homo sapiens GN=HNRNPAB PE=1 SV=2 - [ROAA_HUMAN]	33.13	1	17	19	158	28.31	12	19	31.93	15	28	28.61	13	28	33.13	17	31	29.82	14	27	31.93	14	25
P35241	Radixin OS=Homo sapiens GN=RDX PE=1 SV=1 - [RADI_HUMAN]	33.1	1	4	22	201	26.93	17	29	28.47	17	34	24.36	16	33	29.67	20	43	25.56	17	31	22.47	15	31
Q13243	Serine/arginine-rich splicing factor 5 OS=Homo sapiens GN=SRSF5 PE=1 SV=1 - [SRSF5_HUMAN]	33.09	1	9	10	65	22.43	6	8	17.65	5	12	20.22	5	10	19.85	6	10	28.31	7	14	23.16	6	11
Q13630	GDP-L-fucose synthase OS=Homo sapiens GN=TSTA3 PE=1 SV=1 - [FCL_HUMAN]	33.02	1	8	8	48	27.41	6	9	28.04	6	7	23.36	5	6	19.94	5	7	33.02	7	9	33.02	7	10
P48681	Nestin OS=Homo sapiens GN=NES PE=1 SV=2 - [NEST_HUMAN]	33	1	50	50	311	21.22	29	46	15.55	23	38	24.12	31	59	32.08	40	70	22.46	30	51	19.62	27	47
Q04917	14-3-3 protein eta OS=Homo sapiens GN=YWHAH PE=1 SV=4 - [1433F_HUMAN]	32.93	1	4	15	163	26.83	9	24	28.86	9	29	32.93	12	36	26.83	11	28	30.89	8	20	26.83	10	26
Q8NBS9	Thioredoxin domain-containing protein 5 OS=Homo sapiens GN=TXNDC5 PE=1 SV=2 - [TXND5_HUMAN]	32.87	1	14	14	131	23.38	10	22	27.78	11	23	27.78	11	22	32.87	13	25	32.87	13	20	27.78	11	19
P16152	Carbonyl reductase [NADPH] 1 OS=Homo sapiens GN=CBR1 PE=1 SV=3 - [CBR1_HUMAN]	32.85	2	9	9	41	15.16	4	6	9.75	2	5	30.69	7	11	22.02	4	7	20.94	6	8	19.86	4	4
O43805	Sjoegren syndrome nuclear autoantigen 1 OS=Homo sapiens GN=SSNA1 PE=1 SV=2 - [SSNA1_HUMAN]	32.77	1	3	3	12	11.76	1	1	11.76	1	2	11.76	1	1	32.77	3	6	11.76	1	1	11.76	1	1
P62873	Guanine nucleotide-binding protein G(I)/G(S)/G(T) subunit beta-1 OS=Homo sapiens GN=GNB1 PE=1 SV=3 - [GBB1_HUMAN]	32.65	1	7	7	48	15.88	4	8	15.88	3	6	10.59	4	11	22.35	5	10	27.94	4	7	15.88	3	6
Q9Y3D9	28S ribosomal protein S23, mitochondrial OS=Homo sapiens GN=MRPS23 PE=1 SV=2 - [RT23_HUMAN]	32.63	1	7	7	39	24.21	5	6	24.21	5	6	32.63	6	6	32.63	6	9	21.58	4	6	24.21	4	6
O43765	Small glutamine-rich tetratricopeptide repeat-containing protein alpha OS=Homo sapiens GN=SGTA PE=1 SV=1 - [SGTA_HUMAN]	32.59	1	9	9	91	26.84	7	13	32.59	8	15	32.59	9	20	32.59	9	18	28.43	7	13	26.2	8	12
P14406	Cytochrome c oxidase subunit 7A2, mitochondrial OS=Homo sapiens GN=COX7A2 PE=1 SV=1 - [CX7A2_HUMAN]	32.53	1	1	1	3	32.53	1	1				32.53	1	1	32.53	1	1
O15511	Actin-related protein 2/3 complex subunit 5 OS=Homo sapiens GN=ARPC5 PE=1 SV=3 - [ARPC5_HUMAN]	32.45	1	3	3	11	23.18	2	4	15.23	1	1	7.95	1	1	24.5	2	3	15.23	1	1	15.23	1	1
Q00341	Vigilin OS=Homo sapiens GN=HDLBP PE=1 SV=2 - [VIGLN_HUMAN]	32.41	1	32	32	163	18.3	16	25	19.48	15	25	22.71	19	29	25.47	24	34	23.42	21	30	19.4	16	20
P33240	Cleavage stimulation factor subunit 2 OS=Homo sapiens GN=CSTF2 PE=1 SV=1 - [CSTF2_HUMAN]	32.41	1	8	14	93	25.65	10	17	22.53	8	10	25.82	10	27	29.98	10	15	27.04	10	14	20.28	7	10
A2BFH1	Peptidyl-prolyl cis-trans isomerase A-like 4G OS=Homo sapiens GN=PPIAL4G PE=2 SV=1 - [PAL4G_HUMAN]	32.32	2	1	5	37	28.66	4	11	7.93	1	5	11.59	3	7	7.93	1	3	7.93	2	5	7.93	2	6
Q9BWM7	Sideroflexin-3 OS=Homo sapiens GN=SFXN3 PE=1 SV=2 - [SFXN3_HUMAN]	32.31	1	5	7	19	4.31	1	1	8.92	2	2	21.54	5	7	4.31	1	2	11.69	3	5	8.92	2	2
Q9UL46	Proteasome activator complex subunit 2 OS=Homo sapiens GN=PSME2 PE=1 SV=4 - [PSME2_HUMAN]	32.22	1	5	5	26	10.88	2	2	17.57	3	4	26.78	4	6	23.01	4	7	12.97	2	3	12.97	2	4
P43358	Melanoma-associated antigen 4 OS=Homo sapiens GN=MAGEA4 PE=1 SV=2 - [MAGA4_HUMAN]	32.18	9	14	16	199	32.18	13	33	32.18	13	36	32.18	14	37	32.18	14	31	32.18	15	32	32.18	13	30
P21912	Succinate dehydrogenase [ubiquinone] iron-sulfur subunit, mitochondrial OS=Homo sapiens GN=SDHB PE=1 SV=3 - [SDHB_HUMAN]	32.14	1	9	9	76	27.5	8	17	20.71	6	10	29.29	8	16	25.36	7	8	29.29	8	15	24.64	7	10
Q8WXF1	Paraspeckle component 1 OS=Homo sapiens GN=PSPC1 PE=1 SV=1 - [PSPC1_HUMAN]	32.12	1	9	11	43	18.16	7	10	8.22	3	4	17.59	6	7	22.37	8	10	13.19	5	5	17.02	5	7
Q9P015	39S ribosomal protein L15, mitochondrial OS=Homo sapiens GN=MRPL15 PE=1 SV=1 - [RM15_HUMAN]	32.09	1	8	8	40	27.03	6	8	16.89	3	6	27.03	6	7	20.61	4	6	15.54	4	9	21.62	4	4
Q07666	KH domain-containing, RNA-binding, signal transduction-associated protein 1 OS=Homo sapiens GN=KHDRBS1 PE=1 SV=1 - [KHDR1_HUMAN]	32.05	2	14	14	131	23.25	9	21	25.96	11	18	30.47	12	30	20.99	9	18	27.54	13	24	23.7	10	20
P82909	28S ribosomal protein S36, mitochondrial OS=Homo sapiens GN=MRPS36 PE=1 SV=2 - [RT36_HUMAN]	32.04	1	3	3	12	16.5	2	2	12.62	1	1	16.5	2	2	16.5	2	5	28.16	2	2
Q5SSJ5	Heterochromatin protein 1-binding protein 3 OS=Homo sapiens GN=HP1BP3 PE=1 SV=1 - [HP1B3_HUMAN]	32.01	1	17	17	89	28.03	11	15	23.15	11	13	26.58	11	20	25.32	14	17	28.39	12	14	23.15	10	10
Q9NUP9	Protein lin-7 homolog C OS=Homo sapiens GN=LIN7C PE=1 SV=1 - [LIN7C_HUMAN]	31.98	1	5	5	23	12.69	3	6	12.69	3	5	12.69	3	4	20.3	3	3	20.3	3	4	5.58	1	1
P13073	Cytochrome c oxidase subunit 4 isoform 1, mitochondrial OS=Homo sapiens GN=COX4I1 PE=1 SV=1 - [COX41_HUMAN]	31.95	1	6	6	28	20.71	3	5	11.83	2	3	11.83	1	3	31.95	6	8	22.49	3	5	11.83	2	4
P60953	Cell division control protein 42 homolog OS=Homo sapiens GN=CDC42 PE=1 SV=2 - [CDC42_HUMAN]	31.94	3	6	7	42	8.38	1	4	8.38	2	8	23.04	6	6	24.61	6	10	17.28	5	11	8.38	1	3
O43390	Heterogeneous nuclear ribonucleoprotein R OS=Homo sapiens GN=HNRNPR PE=1 SV=1 - [HNRPR_HUMAN]	31.91	2	17	25	220	30.02	19	34	25.43	16	29	26.7	19	39	28.12	21	51	28.12	17	33	25.43	17	34
Q96CT7	Coiled-coil domain-containing protein 124 OS=Homo sapiens GN=CCDC124 PE=1 SV=1 - [CC124_HUMAN]	31.84	1	7	7	43	27.8	6	9	20.63	3	5	23.77	5	6	27.8	6	6	31.84	7	10	27.8	5	7
P26641	Elongation factor 1-gamma OS=Homo sapiens GN=EEF1G PE=1 SV=3 - [EF1G_HUMAN]	31.81	1	15	15	179	24.49	11	26	21.97	9	30	22.88	10	34	24.26	11	26	21.74	10	31	19.91	10	32
P47985	Cytochrome b-c1 complex subunit Rieske, mitochondrial OS=Homo sapiens GN=UQCRFS1 PE=1 SV=2 - [UCRI_HUMAN]	31.75	2	9	9	70	31.02	6	13	14.6	4	8	31.75	8	15	28.83	7	10	31.75	9	11	22.26	6	13
P69905	Hemoglobin subunit alpha OS=Homo sapiens GN=HBA1 PE=1 SV=2 - [HBA_HUMAN]	31.69	1	4	4	75	31.69	4	11	31.69	4	11	31.69	4	16	20.42	3	14	20.42	3	7	31.69	4	16
P07954	Fumarate hydratase, mitochondrial OS=Homo sapiens GN=FH PE=1 SV=3 - [FUMH_HUMAN]	31.57	1	15	15	119	21.96	9	24	17.25	9	16	21.96	9	19	27.84	12	22	23.14	11	23	19.41	9	15
P61218	DNA-directed RNA polymerases I, II, and III subunit RPABC2 OS=Homo sapiens GN=POLR2F PE=1 SV=1 - [RPAB2_HUMAN]	31.5	1	2	2	3							22.83	1	2				8.66	1	1
P62491	Ras-related protein Rab-11A OS=Homo sapiens GN=RAB11A PE=1 SV=3 - [RB11A_HUMAN]	31.48	2	6	6	44	21.76	4	5	27.31	5	8	27.31	5	9	18.06	3	7	12.5	2	7	22.69	4	8
Q9BY32	Inosine triphosphate pyrophosphatase OS=Homo sapiens GN=ITPA PE=1 SV=2 - [ITPA_HUMAN]	31.44	1	4	4	11	5.15	1	1	4.64	1	1	17.01	3	4	19.59	2	2	5.15	1	1	9.79	2	2
Q16881	Thioredoxin reductase 1, cytoplasmic OS=Homo sapiens GN=TXNRD1 PE=1 SV=3 - [TRXR1_HUMAN]	31.43	2	13	13	48	7.24	2	2	3.7	1	1	22.03	9	17	28.04	9	13	11.71	4	7	11.71	4	8
P27144	Adenylate kinase 4, mitochondrial OS=Homo sapiens GN=AK4 PE=1 SV=1 - [KAD4_HUMAN]	31.39	1	4	4	32	12.56	2	5	12.56	2	4	31.39	4	9	17.94	3	5	12.56	2	3	17.94	3	6
P78537	Biogenesis of lysosome-related organelles complex 1 subunit 1 OS=Homo sapiens GN=BLOC1S1 PE=1 SV=2 - [BL1S1_HUMAN]	31.37	1	2	2	9	12.42	1	1	12.42	1	3	31.37	2	3	12.42	1	2
Q9BUH6	Protein PAXX OS=Homo sapiens GN=C9orf142 PE=1 SV=2 - [PAXX_HUMAN]	31.37	1	3	3	9	19.12	2	2	5.88	1	1	18.14	2	2	13.24	1	1	5.88	1	1	19.12	2	2
P21980	Protein-glutamine gamma-glutamyltransferase 2 OS=Homo sapiens GN=TGM2 PE=1 SV=2 - [TGM2_HUMAN]	31.3	1	18	18	92	14.12	8	10	19.07	8	11	22.42	11	20	29.84	16	23	21.25	10	16	21.83	10	12
Q9UHA3	Probable ribosome biogenesis protein RLP24 OS=Homo sapiens GN=RSL24D1 PE=1 SV=1 - [RLP24_HUMAN]	31.29	1	4	4	19	11.04	1	1	15.95	2	3	23.31	3	4	31.29	4	6	15.95	2	2	15.95	2	3
Q9Y3B2	Exosome complex component CSL4 OS=Homo sapiens GN=EXOSC1 PE=1 SV=1 - [EXOS1_HUMAN]	31.28	1	5	5	33	15.38	2	9	15.38	2	6	31.28	5	7	22.56	3	5	15.38	2	2	15.38	2	4
Q9H7C9	Mth938 domain-containing protein OS=Homo sapiens GN=AAMDC PE=1 SV=1 - [AAMDC_HUMAN]	31.15	1	2	2	13	31.15	2	3	16.39	1	1	16.39	1	1	31.15	2	4	31.15	2	2	31.15	2	2
P00491	Purine nucleoside phosphorylase OS=Homo sapiens GN=PNP PE=1 SV=2 - [PNPH_HUMAN]	31.14	1	5	5	38	15.22	2	6	15.22	3	6	23.53	4	8	22.84	4	8	31.14	4	5	13.84	2	5
O15231	Zinc finger protein 185 OS=Homo sapiens GN=ZNF185 PE=1 SV=3 - [ZN185_HUMAN]	31.06	1	14	14	63	10.45	4	5	20.17	8	11	16.84	6	10	31.06	11	16	15.53	7	10	18.43	8	11
Q9Y696	Chloride intracellular channel protein 4 OS=Homo sapiens GN=CLIC4 PE=1 SV=4 - [CLIC4_HUMAN]	30.83	1	9	9	64	29.64	5	11	26.09	4	8	30.04	7	11	24.9	5	10	26.88	5	10	26.88	6	14
Q01081	Splicing factor U2AF 35 kDa subunit OS=Homo sapiens GN=U2AF1 PE=1 SV=3 - [U2AF1_HUMAN]	30.83	2	5	5	34	9.58	2	4	9.58	2	4	23.33	4	7	27.08	4	8	9.58	2	6	13.33	3	5
P22314	Ubiquitin-like modifier-activating enzyme 1 OS=Homo sapiens GN=UBA1 PE=1 SV=3 - [UBA1_HUMAN]	30.81	1	30	30	262	28.64	23	45	21.55	18	39	24.86	25	52	25.52	24	42	28.92	21	43	25.05	23	41
O00764	Pyridoxal kinase OS=Homo sapiens GN=PDXK PE=1 SV=1 - [PDXK_HUMAN]	30.77	1	6	6	46	30.77	6	11	13.78	3	3	30.77	6	12	17.31	4	6	30.77	6	10	13.78	3	4
Q9Y3C6	Peptidyl-prolyl cis-trans isomerase-like 1 OS=Homo sapiens GN=PPIL1 PE=1 SV=1 - [PPIL1_HUMAN]	30.72	1	4	4	4	18.67	2	2							6.02	1	1	6.02	1	1
Q15717	ELAV-like protein 1 OS=Homo sapiens GN=ELAVL1 PE=1 SV=2 - [ELAV1_HUMAN]	30.67	1	9	9	67	19.33	5	8	19.02	6	11	23.01	5	9	23.01	8	13	15.34	4	7	19.02	6	19
P06493	Cyclin-dependent kinase 1 OS=Homo sapiens GN=CDK1 PE=1 SV=3 - [CDK1_HUMAN]	30.64	1	10	10	54	17.17	4	6	17.85	4	4	17.85	5	7	26.26	8	21	25.59	8	9	17.85	5	7
Q52LJ0	Protein FAM98B OS=Homo sapiens GN=FAM98B PE=1 SV=1 - [FA98B_HUMAN]	30.61	1	8	12	72	26.97	8	11	23.64	10	14	20	9	14	20	7	11	20	7	12	20	7	10
P40222	Alpha-taxilin OS=Homo sapiens GN=TXLNA PE=1 SV=3 - [TXLNA_HUMAN]	30.59	2	10	12	58	12.27	6	7	14.65	5	6	18.5	9	12	27.29	10	14	19.78	7	10	21.25	7	9
P17174	Aspartate aminotransferase, cytoplasmic OS=Homo sapiens GN=GOT1 PE=1 SV=3 - [AATC_HUMAN]	30.51	1	11	11	84	24.94	7	13	28.57	9	15	24.94	9	15	22.76	7	17	22.76	7	14	20.82	5	10
P22102	Trifunctional purine biosynthetic protein adenosine-3 OS=Homo sapiens GN=GART PE=1 SV=1 - [PUR2_HUMAN]	30.4	1	20	20	182	25.25	15	29	26.34	14	22	26.14	14	38	28.51	15	30	26.34	17	33	26.34	15	30
P60602	Reactive oxygen species modulator 1 OS=Homo sapiens GN=ROMO1 PE=1 SV=1 - [ROMO1_HUMAN]	30.38	1	1	1	6	30.38	1	2	30.38	1	1	30.38	1	1	30.38	1	1	30.38	1	1
P33552	Cyclin-dependent kinases regulatory subunit 2 OS=Homo sapiens GN=CKS2 PE=1 SV=1 - [CKS2_HUMAN]	30.38	1	2	2	7	17.72	1	1				17.72	1	1	17.72	1	3	30.38	2	2
Q13155	Aminoacyl tRNA synthase complex-interacting multifunctional protein 2 OS=Homo sapiens GN=AIMP2 PE=1 SV=2 - [AIMP2_HUMAN]	30.31	1	5	5	65	22.5	4	11	8.75	3	5	16.56	4	19	30.31	5	14	8.75	3	6	8.75	3	10
Q9Y5V0	Zinc finger protein 706 OS=Homo sapiens GN=ZNF706 PE=1 SV=1 - [ZN706_HUMAN]	30.26	1	2	2	11	14.47	1	1	30.26	2	2	14.47	1	2	30.26	2	3	14.47	1	1	30.26	2	2
Q5JS54	Proteasome assembly chaperone 4 OS=Homo sapiens GN=PSMG4 PE=2 SV=2 - [PSMG4_HUMAN]	30.08	1	2	2	6	20.33	1	1				30.08	2	2	9.76	1	1	20.33	1	1	20.33	1	1
Q15003	Condensin complex subunit 2 OS=Homo sapiens GN=NCAPH PE=1 SV=3 - [CND2_HUMAN]	29.96	1	14	14	84	13.77	7	10	13.09	8	16	22.94	10	15	23.89	10	19	14.3	7	13	13.77	7	11
Q9Y605	MORF4 family-associated protein 1 OS=Homo sapiens GN=MRFAP1 PE=1 SV=1 - [MOFA1_HUMAN]	29.92	2	2	2	6				11.02	1	1	11.02	1	1	29.92	2	2				29.92	2	2
Q96I24	Far upstream element-binding protein 3 OS=Homo sapiens GN=FUBP3 PE=1 SV=2 - [FUBP3_HUMAN]	29.9	1	11	18	131	22.38	12	27	26.92	13	21	24.83	15	21	25.7	13	22	22.38	12	19	25.17	11	21
P25789	Proteasome subunit alpha type-4 OS=Homo sapiens GN=PSMA4 PE=1 SV=1 - [PSA4_HUMAN]	29.89	1	4	4	15	21.46	3	4	18.01	2	2	24.52	3	5	21.07	2	3	12.64	1	1
P31153	S-adenosylmethionine synthase isoform type-2 OS=Homo sapiens GN=MAT2A PE=1 SV=1 - [METK2_HUMAN]	29.87	1	11	11	61	14.43	5	7	11.65	4	8	27.34	9	13	29.87	11	17	22.78	7	10	14.43	5	6
Q12906	Interleukin enhancer-binding factor 3 OS=Homo sapiens GN=ILF3 PE=1 SV=3 - [ILF3_HUMAN]	29.87	1	16	18	167	15.66	11	25	18.68	13	22	19.13	14	29	25.73	16	33	24.5	15	29	17.23	12	29
Q96AT1	Uncharacterized protein KIAA1143 OS=Homo sapiens GN=KIAA1143 PE=1 SV=2 - [K1143_HUMAN]	29.87	1	3	3	16	10.39	1	1	18.83	2	3	29.87	3	4	18.83	2	4	18.83	2	2	18.83	2	2
P62875	DNA-directed RNA polymerases I, II, and III subunit RPABC5 OS=Homo sapiens GN=POLR2L PE=1 SV=1 - [RPAB5_HUMAN]	29.85	1	2	2	14	29.85	1	1	29.85	2	3	29.85	2	6	29.85	1	1	29.85	2	2	29.85	1	1
Q5T653	39S ribosomal protein L2, mitochondrial OS=Homo sapiens GN=MRPL2 PE=1 SV=2 - [RM02_HUMAN]	29.84	1	6	6	26	7.21	1	1	20	4	5	21.64	4	5	11.8	2	7	19.67	4	4	20	4	4
P18754	Regulator of chromosome condensation OS=Homo sapiens GN=RCC1 PE=1 SV=1 - [RCC1_HUMAN]	29.69	1	6	6	30	13.3	2	3	18.53	3	3	22.09	4	7	20.9	4	5	22.09	4	7	16.86	3	5
Q9BXY0	Protein MAK16 homolog OS=Homo sapiens GN=MAK16 PE=1 SV=2 - [MAK16_HUMAN]	29.67	1	7	7	33	13.33	3	5	13.33	2	4	19.33	5	9	29.67	6	8	13.33	3	4	13.33	2	3
Q9Y4Y9	U6 snRNA-associated Sm-like protein LSm5 OS=Homo sapiens GN=LSM5 PE=1 SV=3 - [LSM5_HUMAN]	29.67	1	2	2	18	29.67	2	3	29.67	1	2	29.67	2	4	29.67	2	5	29.67	2	2	29.67	1	2
Q15942	Zyxin OS=Homo sapiens GN=ZYX PE=1 SV=1 - [ZYX_HUMAN]	29.55	1	10	10	77	20.63	7	8	25.17	9	13	20.98	7	10	29.55	10	22	24.48	7	12	15.21	6	12
Q9NYL9	Tropomodulin-3 OS=Homo sapiens GN=TMOD3 PE=1 SV=1 - [TMOD3_HUMAN]	29.55	2	11	11	81	26.42	10	18	25.85	8	10	29.55	10	18	26.42	9	11	26.42	9	11	26.42	7	13
Q99615	DnaJ homolog subfamily C member 7 OS=Homo sapiens GN=DNAJC7 PE=1 SV=2 - [DNJC7_HUMAN]	29.55	1	10	10	63	15.99	6	14	20.24	7	9	15.99	6	6	20.85	7	16	23.28	8	11	15.99	6	7
P08134	Rho-related GTP-binding protein RhoC OS=Homo sapiens GN=RHOC PE=1 SV=1 - [RHOC_HUMAN]	29.53	1	4	9	41	27.98	5	7	15.03	3	6	22.8	5	7	29.53	9	11	21.24	5	8	15.03	2	2
Q9Y221	60S ribosome subunit biogenesis protein NIP7 homolog OS=Homo sapiens GN=NIP7 PE=1 SV=1 - [NIP7_HUMAN]	29.44	1	3	3	3	15.56	1	1	18.33	1	1				11.11	1	1
P60059	Protein transport protein Sec61 subunit gamma OS=Homo sapiens GN=SEC61G PE=1 SV=1 - [SC61G_HUMAN]	29.41	1	2	2	11	29.41	1	2	29.41	1	1	29.41	1	4	29.41	1	1	29.41	2	2	29.41	1	1
P20962	Parathymosin OS=Homo sapiens GN=PTMS PE=1 SV=2 - [PTMS_HUMAN]	29.41	1	4	4	17	13.73	1	1	25.49	2	2	27.45	3	5	29.41	4	4	13.73	1	1	27.45	3	4
Q9UK41	Vacuolar protein sorting-associated protein 28 homolog OS=Homo sapiens GN=VPS28 PE=1 SV=1 - [VPS28_HUMAN]	29.41	1	6	6	39	12.22	2	3	20.36	3	7	24.43	4	7	21.27	5	11	24.43	4	7	24.43	4	4
O75934	Pre-mRNA-splicing factor SPF27 OS=Homo sapiens GN=BCAS2 PE=1 SV=1 - [SPF27_HUMAN]	29.33	1	7	7	36	16.89	4	8	16	3	4	20.89	4	7	28.89	6	7	15.11	3	6	16	3	4
O75438	NADH dehydrogenase [ubiquinone] 1 beta subcomplex subunit 1 OS=Homo sapiens GN=NDUFB1 PE=1 SV=1 - [NDUB1_HUMAN]	29.31	1	3	3	15	29.31	3	5	29.31	2	3	18.97	1	2	18.97	1	3	18.97	1	1	18.97	1	1
Q9Y570	Protein phosphatase methylesterase 1 OS=Homo sapiens GN=PPME1 PE=1 SV=3 - [PPME1_HUMAN]	29.27	1	9	9	68	22.28	7	12	22.54	6	10	23.06	7	13	27.98	8	13	21.76	7	10	22.54	6	10
P49247	Ribose-5-phosphate isomerase OS=Homo sapiens GN=RPIA PE=1 SV=3 - [RPIA_HUMAN]	29.26	1	7	7	59	19.94	4	11	19.94	5	10	14.47	3	9	22.51	5	9	22.51	5	9	18.65	4	11
Q8WUM4	Programmed cell death 6-interacting protein OS=Homo sapiens GN=PDCD6IP PE=1 SV=1 - [PDC6I_HUMAN]	29.26	1	19	19	138	17.86	10	16	14.52	10	16	22.58	14	29	29.03	18	35	19.24	12	25	17.05	12	17
Q9P013	Spliceosome-associated protein CWC15 homolog OS=Homo sapiens GN=CWC15 PE=1 SV=2 - [CWC15_HUMAN]	29.26	1	4	4	8										13.1	2	3	23.58	3	3	13.1	2	2
Q9Y2V2	Calcium-regulated heat stable protein 1 OS=Homo sapiens GN=CARHSP1 PE=1 SV=2 - [CHSP1_HUMAN]	29.25	1	4	4	30	29.25	4	5	29.25	4	5	29.25	3	4	29.25	4	6	29.25	4	6	29.25	3	4
P09874	Poly [ADP-ribose] polymerase 1 OS=Homo sapiens GN=PARP1 PE=1 SV=4 - [PARP1_HUMAN]	29.19	1	24	24	165	19.13	13	24	17.75	12	21	18.15	15	28	22.49	16	27	20.12	17	33	23.37	17	32
P54577	Tyrosine--tRNA ligase, cytoplasmic OS=Homo sapiens GN=YARS PE=1 SV=4 - [SYYC_HUMAN]	29.17	1	12	12	52	12.12	5	6	13.07	4	8	18.75	6	12	25.57	9	13	14.02	5	9	12.12	4	4
P37837	Transaldolase OS=Homo sapiens GN=TALDO1 PE=1 SV=2 - [TALDO_HUMAN]	29.08	1	11	11	79	24.93	9	11	15.43	6	10	21.66	8	17	23.44	9	17	24.04	9	15	15.73	6	9
P31150	Rab GDP dissociation inhibitor alpha OS=Homo sapiens GN=GDI1 PE=1 SV=2 - [GDIA_HUMAN]	29.08	1	5	8	67	12.53	5	8	16.11	5	11	22.6	7	14	22.6	7	13	20.36	6	9	22.6	7	12
Q14258	E3 ubiquitin/ISG15 ligase TRIM25 OS=Homo sapiens GN=TRIM25 PE=1 SV=2 - [TRI25_HUMAN]	29.05	1	13	13	68	9.37	5	7	9.84	4	4	19.21	9	17	26.83	11	19	16.03	8	13	11.11	6	8
P09496	Clathrin light chain A OS=Homo sapiens GN=CLTA PE=1 SV=1 - [CLCA_HUMAN]	29.03	1	11	11	108	22.18	8	21	22.18	8	18	22.18	7	18	25.4	9	22	22.18	7	13	18.55	7	16
P29373	Cellular retinoic acid-binding protein 2 OS=Homo sapiens GN=CRABP2 PE=1 SV=2 - [RABP2_HUMAN]	28.99	1	4	4	22	13.77	2	3	13.77	2	3	28.99	3	6	28.26	3	4	13.04	1	3	13.77	2	3
Q9HCN8	Stromal cell-derived factor 2-like protein 1 OS=Homo sapiens GN=SDF2L1 PE=1 SV=2 - [SDF2L_HUMAN]	28.96	1	5	5	54	28.96	4	9	25.79	4	13	25.79	3	8	25.79	3	8	25.79	3	9	25.79	3	7
Q13435	Splicing factor 3B subunit 2 OS=Homo sapiens GN=SF3B2 PE=1 SV=2 - [SF3B2_HUMAN]	28.94	1	16	16	97	8.94	5	11	13.41	7	12	16.09	9	16	21.23	12	21	18.66	10	19	16.76	9	18
P05204	Non-histone chromosomal protein HMG-17 OS=Homo sapiens GN=HMGN2 PE=1 SV=3 - [HMGN2_HUMAN]	28.89	1	2	3	62	16.67	1	8	28.89	3	11	16.67	1	7	28.89	3	11	20	2	12	28.89	3	13
P12277	Creatine kinase B-type OS=Homo sapiens GN=CKB PE=1 SV=1 - [KCRB_HUMAN]	28.87	2	7	7	35	11.81	3	4	3.41	2	3	23.36	5	8	22.31	5	9	16.8	4	5	13.39	4	6
Q14498	RNA-binding protein 39 OS=Homo sapiens GN=RBM39 PE=1 SV=2 - [RBM39_HUMAN]	28.87	2	11	11	74	22.26	7	11	16.04	5	9	24.91	8	16	25.85	9	10	23.02	9	14	22.26	8	14
Q9Y4L1	Hypoxia up-regulated protein 1 OS=Homo sapiens GN=HYOU1 PE=1 SV=1 - [HYOU1_HUMAN]	28.83	1	24	24	130	16.62	12	19	13.51	9	14	23.12	18	30	25.03	16	30	22.22	14	21	19.32	12	16
Q5JRK9	Putative G antigen family E member 3 OS=Homo sapiens GN=PAGE2B PE=2 SV=1 - [GGEE3_HUMAN]	28.83	2	2	2	6	28.83	2	3				18.02	1	1	18.02	1	1	10.81	1	1
P42166	Lamina-associated polypeptide 2, isoform alpha OS=Homo sapiens GN=TMPO PE=1 SV=2 - [LAP2A_HUMAN]	28.82	1	11	16	85	18.01	9	12	12.25	6	10	17.29	8	12	25.94	13	25	20.32	10	14	13.54	6	12
P33176	Kinesin-1 heavy chain OS=Homo sapiens GN=KIF5B PE=1 SV=1 - [KINH_HUMAN]	28.76	3	26	26	155	20.25	16	25	14.85	13	22	21.5	16	23	25.65	21	38	22.53	19	28	16.51	13	19
P61244	Protein max OS=Homo sapiens GN=MAX PE=1 SV=1 - [MAX_HUMAN]	28.75	1	3	3	44	22.5	2	13	22.5	2	7	22.5	2	5	22.5	2	7	28.75	3	4	13.13	1	8
Q14696	LDLR chaperone MESD OS=Homo sapiens GN=MESDC2 PE=1 SV=2 - [MESD_HUMAN]	28.63	1	3	3	15	12.82	2	3	7.26	1	2	7.26	1	2	7.26	1	3	23.08	2	3	7.26	1	2
Q9H6F5	Coiled-coil domain-containing protein 86 OS=Homo sapiens GN=CCDC86 PE=1 SV=1 - [CCD86_HUMAN]	28.61	1	8	8	42	15.83	4	5	15.83	4	5	18.06	5	8	21.67	6	9	15.83	4	5	20.56	5	10
Q9H0C8	Integrin-linked kinase-associated serine/threonine phosphatase 2C OS=Homo sapiens GN=ILKAP PE=1 SV=1 - [ILKAP_HUMAN]	28.57	1	9	9	70	25	7	11	16.84	5	11	28.57	8	16	26.28	7	9	28.57	9	13	20.41	5	10
Q00796	Sorbitol dehydrogenase OS=Homo sapiens GN=SORD PE=1 SV=4 - [DHSO_HUMAN]	28.57	1	6	6	26	7.56	2	2	3.36	1	1	18.21	4	8	28.57	6	10	9.52	2	3	4.2	1	2
Q99584	Protein S100-A13 OS=Homo sapiens GN=S100A13 PE=1 SV=1 - [S10AD_HUMAN]	28.57	1	3	3	22	11.22	2	4	10.2	1	1	28.57	3	3	11.22	2	5	27.55	2	4	28.57	3	5
P06730	Eukaryotic translation initiation factor 4E OS=Homo sapiens GN=EIF4E PE=1 SV=2 - [IF4E_HUMAN]	28.57	1	6	6	25	23.04	4	4	23.96	4	5	13.36	2	3	17.97	3	3	23.5	5	6	23.96	4	4
Q96B36	Proline-rich AKT1 substrate 1 OS=Homo sapiens GN=AKT1S1 PE=1 SV=1 - [AKTS1_HUMAN]	28.52	1	4	4	18	10.94	1	2	16.8	2	2	22.66	3	5	10.94	1	2	14.84	2	2	14.84	2	5
P51970	NADH dehydrogenase [ubiquinone] 1 alpha subcomplex subunit 8 OS=Homo sapiens GN=NDUFA8 PE=1 SV=3 - [NDUA8_HUMAN]	28.49	1	5	5	26	22.67	3	5	16.28	2	2	15.7	3	4	26.16	4	6	9.88	2	5	25	3	4
Q13247	Serine/arginine-rich splicing factor 6 OS=Homo sapiens GN=SRSF6 PE=1 SV=2 - [SRSF6_HUMAN]	28.49	1	14	16	161	20.64	11	25	25.58	14	26	25.29	13	31	23.55	9	23	20.64	11	25	23.84	12	31
Q9UHX1	Poly(U)-binding-splicing factor PUF60 OS=Homo sapiens GN=PUF60 PE=1 SV=1 - [PUF60_HUMAN]	28.44	1	11	11	90	20.21	9	15	22.54	8	15	18.6	8	14	22.9	9	17	24.15	10	15	18.6	8	14
Q86U42	Polyadenylate-binding protein 2 OS=Homo sapiens GN=PABPN1 PE=1 SV=3 - [PABP2_HUMAN]	28.43	2	5	5	26	4.25	2	4	4.25	2	3	19.61	3	5	4.25	2	4	13.07	4	6	4.25	2	4
Q9BRP8	Partner of Y14 and mago OS=Homo sapiens GN=WIBG PE=1 SV=1 - [WIBG_HUMAN]	28.43	1	3	3	19	10.29	1	3	19.61	2	5	9.31	1	1	19.61	2	3	10.29	1	1	28.43	3	6
Q9Y333	U6 snRNA-associated Sm-like protein LSm2 OS=Homo sapiens GN=LSM2 PE=1 SV=1 - [LSM2_HUMAN]	28.42	1	2	2	21	28.42	2	4	28.42	2	2	28.42	2	3	28.42	2	5	28.42	2	3	28.42	2	4
Q12874	Splicing factor 3A subunit 3 OS=Homo sapiens GN=SF3A3 PE=1 SV=1 - [SF3A3_HUMAN]	28.34	1	13	13	71	15.17	5	7	16.97	7	12	17.96	6	11	24.55	11	15	19.76	8	13	19.96	8	13
Q9NQR4	Omega-amidase NIT2 OS=Homo sapiens GN=NIT2 PE=1 SV=1 - [NIT2_HUMAN]	28.26	1	5	5	15	9.06	1	1				9.06	2	4	24.28	4	4	15.22	3	3	15.22	3	3
P41091	Eukaryotic translation initiation factor 2 subunit 3 OS=Homo sapiens GN=EIF2S3 PE=1 SV=3 - [IF2G_HUMAN]	28.18	2	11	11	42	12.08	4	5	12.08	4	4	19.07	6	10	20.34	7	10	16.1	5	5	12.08	6	8
Q9Y3D5	28S ribosomal protein S18c, mitochondrial OS=Homo sapiens GN=MRPS18C PE=1 SV=1 - [RT18C_HUMAN]	28.17	1	2	2	3							28.17	2	2							14.79	1	1
Q8WXI9	Transcriptional repressor p66-beta OS=Homo sapiens GN=GATAD2B PE=1 SV=1 - [P66B_HUMAN]	28.16	1	9	10	71	10.96	5	14	12.48	6	11	16.02	7	12	24.62	9	13	12.48	6	10	16.19	7	11
O75964	ATP synthase subunit g, mitochondrial OS=Homo sapiens GN=ATP5L PE=1 SV=3 - [ATP5L_HUMAN]	28.16	1	2	2	16	28.16	2	2	28.16	2	3	28.16	2	4	28.16	2	3	19.42	1	1	28.16	2	3
P13987	CD59 glycoprotein OS=Homo sapiens GN=CD59 PE=1 SV=1 - [CD59_HUMAN]	28.13	1	5	5	37	28.13	3	8	28.13	5	6	28.13	3	5	28.13	4	8	28.13	3	3	28.13	4	7
Q9Y534	Cold shock domain-containing protein C2 OS=Homo sapiens GN=CSDC2 PE=2 SV=1 - [CSDC2_HUMAN]	28.1	1	3	3	13	28.1	2	2	10.46	1	1	28.1	2	2	28.1	3	6	10.46	1	1	10.46	1	1
Q99848	Probable rRNA-processing protein EBP2 OS=Homo sapiens GN=EBNA1BP2 PE=1 SV=2 - [EBP2_HUMAN]	28.1	1	7	7	22	12.09	3	3	9.15	2	5	12.09	3	5	3.92	1	1	18.63	4	4	18.63	4	4
P19388	DNA-directed RNA polymerases I, II, and III subunit RPABC1 OS=Homo sapiens GN=POLR2E PE=1 SV=4 - [RPAB1_HUMAN]	28.1	1	5	5	37	17.14	3	4	20.95	4	6	17.14	3	6	20.95	4	8	24.29	4	9	24.29	4	4
O95793	Double-stranded RNA-binding protein Staufen homolog 1 OS=Homo sapiens GN=STAU1 PE=1 SV=2 - [STAU1_HUMAN]	28.08	1	11	11	65	18.54	7	8	18.54	6	6	23.05	8	15	23.57	9	11	20.8	8	17	18.54	6	8
Q8N488	RING1 and YY1-binding protein OS=Homo sapiens GN=RYBP PE=1 SV=2 - [RYBP_HUMAN]	28.07	1	3	3	5							21.05	2	2	21.93	2	2	6.14	1	1
Q9UN86	Ras GTPase-activating protein-binding protein 2 OS=Homo sapiens GN=G3BP2 PE=1 SV=2 - [G3BP2_HUMAN]	28.01	1	6	9	45	16.6	4	6	20.95	6	7	20.12	6	9	19.92	6	8	19.71	5	6	21.99	6	9
Q9BTL3	RNMT-activating mini protein OS=Homo sapiens GN=FAM103A1 PE=1 SV=1 - [RAM_HUMAN]	27.97	1	2	2	11	27.97	2	3	19.49	1	1	8.47	1	1	27.97	2	2	27.97	2	3	19.49	1	1
P53041	Serine/threonine-protein phosphatase 5 OS=Homo sapiens GN=PPP5C PE=1 SV=1 - [PPP5_HUMAN]	27.86	2	10	10	52	11.82	4	7	11.42	4	6	14.03	6	8	25.65	9	12	24.85	8	10	14.03	5	9
Q9NPJ3	Acyl-coenzyme A thioesterase 13 OS=Homo sapiens GN=ACOT13 PE=1 SV=1 - [ACO13_HUMAN]	27.86	1	3	3	14	27.86	2	2	15.71	1	2	15.71	2	2	15.71	2	3	15.71	2	3	15.71	2	2
P47756	F-actin-capping protein subunit beta OS=Homo sapiens GN=CAPZB PE=1 SV=4 - [CAPZB_HUMAN]	27.8	1	8	8	50	27.8	5	9	27.8	4	4	27.8	4	10	27.8	7	12	27.8	5	9	27.8	5	6
P78406	mRNA export factor OS=Homo sapiens GN=RAE1 PE=1 SV=1 - [RAE1L_HUMAN]	27.72	1	9	9	82	25	7	11	27.72	8	14	27.72	9	19	27.72	8	12	27.72	8	13	25	7	13
O00264	Membrane-associated progesterone receptor component 1 OS=Homo sapiens GN=PGRMC1 PE=1 SV=3 - [PGRC1_HUMAN]	27.69	1	13	13	97	23.08	10	15	27.18	10	14	23.08	9	18	27.18	11	19	23.59	9	15	27.18	10	16
P43897	Elongation factor Ts, mitochondrial OS=Homo sapiens GN=TSFM PE=1 SV=2 - [EFTS_HUMAN]	27.69	1	5	5	11							20.62	3	4	18.15	3	3	11.69	2	3	8.31	1	1
P63244	Guanine nucleotide-binding protein subunit beta-2-like 1 OS=Homo sapiens GN=GNB2L1 PE=1 SV=3 - [GBLP_HUMAN]	27.44	1	6	6	15	9.46	2	3	6.31	1	1	24.29	4	4	9.46	2	4	6.31	2	2	6.31	1	1
P36957	Dihydrolipoyllysine-residue succinyltransferase component of 2-oxoglutarate dehydrogenase complex, mitochondrial OS=Homo sapiens GN=DLST PE=1 SV=4 - [ODO2_HUMAN]	27.37	1	10	10	48	16.56	4	6	18.32	6	8	24.72	8	13	20.97	7	8	15.45	4	7	13.91	4	6
O14618	Copper chaperone for superoxide dismutase OS=Homo sapiens GN=CCS PE=1 SV=1 - [CCS_HUMAN]	27.37	1	4	4	37	27.37	4	7	24.45	3	9	12.41	2	4	27.37	4	7	24.45	3	6	24.45	3	4
P63272	Transcription elongation factor SPT4 OS=Homo sapiens GN=SUPT4H1 PE=1 SV=1 - [SPT4H_HUMAN]	27.35	1	2	2	14	27.35	2	3	27.35	2	2	27.35	2	2	27.35	2	2	27.35	2	2	27.35	2	3
Q9H2H8	Peptidyl-prolyl cis-trans isomerase-like 3 OS=Homo sapiens GN=PPIL3 PE=1 SV=1 - [PPIL3_HUMAN]	27.33	1	2	2	2										27.33	2	2
P23526	Adenosylhomocysteinase OS=Homo sapiens GN=AHCY PE=1 SV=4 - [SAHH_HUMAN]	27.31	1	10	10	85	21.3	7	12	22.22	7	15	21.3	7	13	27.31	10	21	16.67	7	11	16.67	6	13
O75369	Filamin-B OS=Homo sapiens GN=FLNB PE=1 SV=2 - [FLNB_HUMAN]	27.29	1	49	62	358	18.06	36	50	16.72	38	59	22.48	43	68	22.83	46	63	19.72	42	63	17.95	35	55
P62328	Thymosin beta-4 OS=Homo sapiens GN=TMSB4X PE=1 SV=2 - [TYB4_HUMAN]	27.27	1	1	1	6	27.27	1	1	27.27	1	1	27.27	1	2	27.27	1	1	27.27	1	1
O43768	Alpha-endosulfine OS=Homo sapiens GN=ENSA PE=1 SV=1 - [ENSA_HUMAN]	27.27	2	4	4	18	20.66	2	3	20.66	2	3	22.31	3	3	20.66	2	4	20.66	2	2	25.62	3	3
Q04323	UBX domain-containing protein 1 OS=Homo sapiens GN=UBXN1 PE=1 SV=2 - [UBXN1_HUMAN]	27.27	1	8	8	36	11.78	4	4	17.17	3	3	17.17	4	6	12.12	4	5	23.23	6	10	23.57	5	8
P45973	Chromobox protein homolog 5 OS=Homo sapiens GN=CBX5 PE=1 SV=1 - [CBX5_HUMAN]	27.23	1	3	4	36	24.61	3	5	24.61	3	4	27.23	4	6	27.23	4	11	27.23	4	6	24.61	3	4
P82932	28S ribosomal protein S6, mitochondrial OS=Homo sapiens GN=MRPS6 PE=1 SV=3 - [RT06_HUMAN]	27.2	1	3	3	17	27.2	2	3	27.2	2	2	27.2	2	2	27.2	3	4	27.2	3	4	27.2	2	2
P46937	Transcriptional coactivator YAP1 OS=Homo sapiens GN=YAP1 PE=1 SV=2 - [YAP1_HUMAN]	27.18	1	9	9	81	19.05	6	16	16.87	4	9	21.63	7	15	19.64	4	9	19.05	5	17	21.63	7	15
Q9Y6H1	Coiled-coil-helix-coiled-coil-helix domain-containing protein 2, mitochondrial OS=Homo sapiens GN=CHCHD2 PE=1 SV=1 - [CHCH2_HUMAN]	27.15	2	2	2	17	18.54	1	1	27.15	2	4	8.61	1	2	27.15	2	3	27.15	2	4	27.15	2	3
Q9UHB6	LIM domain and actin-binding protein 1 OS=Homo sapiens GN=LIMA1 PE=1 SV=1 - [LIMA1_HUMAN]	27.14	1	16	16	159	19.63	11	25	24.24	12	20	21.48	12	27	25.69	14	29	25.69	15	35	19.63	10	23
P14678	Small nuclear ribonucleoprotein-associated proteins B and B' OS=Homo sapiens GN=SNRPB PE=1 SV=2 - [RSMB_HUMAN]	27.08	2	8	8	72	17.5	6	15	16.67	3	8	21.25	7	13	27.08	7	14	21.25	5	11	21.25	5	11
Q9H7E9	UPF0488 protein C8orf33 OS=Homo sapiens GN=C8orf33 PE=1 SV=1 - [CH033_HUMAN]	27.07	1	3	3	21	27.07	3	3	14.41	2	3	14.41	2	3	14.41	2	5	27.07	3	4	14.41	2	3
Q9NVS2	28S ribosomal protein S18a, mitochondrial OS=Homo sapiens GN=MRPS18A PE=1 SV=1 - [RT18A_HUMAN]	27.04	1	4	4	11	13.78	2	2	13.78	2	3	8.16	1	2	15.82	2	2	8.16	1	1	8.16	1	1
Q96EP5	DAZ-associated protein 1 OS=Homo sapiens GN=DAZAP1 PE=1 SV=1 - [DAZP1_HUMAN]	27.03	1	8	8	44	21.62	4	5	10.32	2	5	21.62	4	8	27.03	7	10	16.95	4	11	14.99	3	5
P82933	28S ribosomal protein S9, mitochondrial OS=Homo sapiens GN=MRPS9 PE=1 SV=2 - [RT09_HUMAN]	27.02	1	8	8	29	11.11	3	4	7.83	2	2	12.88	4	5	21.46	6	9	14.9	4	5	11.11	3	4
P00390	Glutathione reductase, mitochondrial OS=Homo sapiens GN=GSR PE=1 SV=2 - [GSHR_HUMAN]	27.01	1	9	9	59	17.43	5	10	13.98	4	6	21.26	7	13	21.46	7	11	14.37	5	12	14.37	5	7
P30048	Thioredoxin-dependent peroxide reductase, mitochondrial OS=Homo sapiens GN=PRDX3 PE=1 SV=3 - [PRDX3_HUMAN]	26.95	1	7	7	41	26.95	4	7	19.92	3	5	26.95	4	7	25.39	6	11	19.92	3	5	26.95	5	6
Q8NBJ7	Sulfatase-modifying factor 2 OS=Homo sapiens GN=SUMF2 PE=1 SV=2 - [SUMF2_HUMAN]	26.91	1	6	6	34	23.59	5	8	19.6	4	6	19.6	4	4	16.94	4	6	15.61	3	5	18.94	4	5
Q8N5M4	Tetratricopeptide repeat protein 9C OS=Homo sapiens GN=TTC9C PE=1 SV=1 - [TTC9C_HUMAN]	26.9	1	4	4	21	26.9	4	5	18.71	3	6	18.71	2	2	18.71	2	3	18.71	2	2	18.71	2	3
Q92499	ATP-dependent RNA helicase DDX1 OS=Homo sapiens GN=DDX1 PE=1 SV=2 - [DDX1_HUMAN]	26.89	1	17	17	96	19.05	9	12	18.78	10	16	22.97	12	20	23.51	14	21	18.11	13	19	13.78	7	8
Q9Y6M1	Insulin-like growth factor 2 mRNA-binding protein 2 OS=Homo sapiens GN=IGF2BP2 PE=1 SV=2 - [IF2B2_HUMAN]	26.88	3	16	16	114	19.53	9	15	19.37	10	22	23.04	13	22	21.04	10	18	20.2	11	20	18.86	8	17
Q05682	Caldesmon OS=Homo sapiens GN=CALD1 PE=1 SV=3 - [CALD1_HUMAN]	26.86	1	19	19	156	23.71	15	24	21.69	14	24	21.69	15	29	24.84	17	30	23.08	15	29	21.82	14	20
Q8IVM0	Coiled-coil domain-containing protein 50 OS=Homo sapiens GN=CCDC50 PE=1 SV=1 - [CCD50_HUMAN]	26.8	1	6	6	40	17.65	4	8	14.38	3	6	17.97	4	8	21.9	5	8	21.9	5	6	14.38	3	4
Q9NS69	Mitochondrial import receptor subunit TOM22 homolog OS=Homo sapiens GN=TOMM22 PE=1 SV=3 - [TOM22_HUMAN]	26.76	1	2	2	52	26.76	2	9	26.76	2	8	26.76	2	7	26.76	2	10	26.76	2	8	26.76	2	10
Q9UQN3	Charged multivesicular body protein 2b OS=Homo sapiens GN=CHMP2B PE=1 SV=1 - [CHM2B_HUMAN]	26.76	1	5	5	23	17.84	2	3	21.13	3	6	23.47	3	4	17.84	3	4	21.13	3	4	13.15	2	2
Q9BWJ5	Splicing factor 3B subunit 5 OS=Homo sapiens GN=SF3B5 PE=1 SV=1 - [SF3B5_HUMAN]	26.74	1	2	2	49	26.74	2	8	26.74	2	9	17.44	1	7	17.44	1	8	17.44	1	9	17.44	1	8
Q9BQ04	RNA-binding protein 4B OS=Homo sapiens GN=RBM4B PE=1 SV=1 - [RBM4B_HUMAN]	26.74	1	2	7	41	18.94	6	9	11.7	3	3	18.38	5	8	23.96	5	13	10.58	3	3	16.16	4	5
P84095	Rho-related GTP-binding protein RhoG OS=Homo sapiens GN=RHOG PE=1 SV=1 - [RHOG_HUMAN]	26.7	3	2	3	10				20.94	2	2	15.71	2	3	5.76	1	1	10.99	1	1	20.94	2	3
Q01085	Nucleolysin TIAR OS=Homo sapiens GN=TIAL1 PE=1 SV=1 - [TIAR_HUMAN]	26.67	1	5	7	21	9.07	3	3	9.07	2	3	23.2	5	5	14.13	3	4	17.6	4	5	5.6	1	1
Q96B45	UPF0693 protein C10orf32 OS=Homo sapiens GN=C10orf32 PE=1 SV=1 - [CJ032_HUMAN]	26.67	1	2	2	5				17.14	1	1	9.52	1	1				17.14	1	3
O60716	Catenin delta-1 OS=Homo sapiens GN=CTNND1 PE=1 SV=1 - [CTND1_HUMAN]	26.55	1	17	17	91	11.98	6	11	13.33	6	9	11.26	6	8	23.24	15	29	18.9	11	20	14.57	7	14
Q9H2W6	39S ribosomal protein L46, mitochondrial OS=Homo sapiens GN=MRPL46 PE=1 SV=1 - [RM46_HUMAN]	26.52	1	5	5	15	10.04	2	2	13.98	2	2	10.04	2	2	13.26	3	3	11.83	3	3	10.04	2	3
P13010	X-ray repair cross-complementing protein 5 OS=Homo sapiens GN=XRCC5 PE=1 SV=3 - [XRCC5_HUMAN]	26.5	1	16	16	64	13.52	7	12	3.96	3	4	19.95	12	18	15.03	9	13	17.62	9	12	2.73	3	5
P22695	Cytochrome b-c1 complex subunit 2, mitochondrial OS=Homo sapiens GN=UQCRC2 PE=1 SV=3 - [QCR2_HUMAN]	26.49	1	9	9	39	11.26	3	4	7.28	2	3	20.31	5	6	17.44	6	10	11.7	5	8	16.34	5	8
P21281	V-type proton ATPase subunit B, brain isoform OS=Homo sapiens GN=ATP6V1B2 PE=1 SV=3 - [VATB2_HUMAN]	26.42	2	7	7	53	22.7	6	10	8.81	3	6	26.42	7	12	26.42	7	11	22.11	6	10	8.81	3	4
O60828	Polyglutamine-binding protein 1 OS=Homo sapiens GN=PQBP1 PE=1 SV=1 - [PQBP1_HUMAN]	26.42	1	3	3	20	16.98	2	2	26.42	3	3	16.98	2	5	21.89	2	3	26.42	3	3	26.42	3	4
P36954	DNA-directed RNA polymerase II subunit RPB9 OS=Homo sapiens GN=POLR2I PE=1 SV=1 - [RPB9_HUMAN]	26.4	1	2	2	10	12.8	1	2	12.8	1	1	12.8	1	1	26.4	2	2	12.8	1	1	12.8	1	3
P61289	Proteasome activator complex subunit 3 OS=Homo sapiens GN=PSME3 PE=1 SV=1 - [PSME3_HUMAN]	26.38	1	5	5	8				5.91	1	1				20.47	4	6	5.91	1	1
O94776	Metastasis-associated protein MTA2 OS=Homo sapiens GN=MTA2 PE=1 SV=1 - [MTA2_HUMAN]	26.35	2	13	13	86	19.01	9	12	17.07	7	8	19.01	9	14	23.05	12	24	22.31	10	15	17.37	8	13
Q8NHV5	Uncharacterized protein C16orf52 OS=Homo sapiens GN=C16orf52 PE=2 SV=3 - [CP052_HUMAN]	26.35	1	1	1	1										26.35	1	1
O60701	UDP-glucose 6-dehydrogenase OS=Homo sapiens GN=UGDH PE=1 SV=1 - [UGDH_HUMAN]	26.32	1	10	10	41	8.1	3	4	5.47	3	5	18.62	7	8	15.79	7	9	8.1	5	8	8.1	3	7
P38919	Eukaryotic initiation factor 4A-III OS=Homo sapiens GN=EIF4A3 PE=1 SV=4 - [IF4A3_HUMAN]	26.28	1	6	7	80	15.57	4	15	14.36	4	10	25.55	6	15	21.65	5	13	26.28	6	15	15.57	4	12
Q6P5R6	60S ribosomal protein L22-like 1 OS=Homo sapiens GN=RPL22L1 PE=1 SV=2 - [RL22L_HUMAN]	26.23	1	1	6	28	13.11	3	4	13.93	3	4	22.95	4	6	26.23	5	10	6.56	2	2	6.56	2	2
E9PRG8	Uncharacterized protein C11orf98 OS=Homo sapiens GN=C11orf98 PE=4 SV=1 - [CK098_HUMAN]	26.23	1	4	4	21	12.3	2	5	26.23	4	6	12.3	2	2	12.3	2	2	12.3	2	2	12.3	2	4
Q99417	C-Myc-binding protein OS=Homo sapiens GN=MYCBP PE=1 SV=3 - [MYCBP_HUMAN]	26.21	1	2	2	32	26.21	2	4	26.21	2	4	26.21	2	6	26.21	2	6	26.21	2	8	26.21	2	4
P36542	ATP synthase subunit gamma, mitochondrial OS=Homo sapiens GN=ATP5C1 PE=1 SV=1 - [ATPG_HUMAN]	26.17	1	7	7	29	17.45	5	5	10.4	3	3	22.48	5	7	19.8	5	5	16.78	4	4	22.48	5	5
P49006	MARCKS-related protein OS=Homo sapiens GN=MARCKSL1 PE=1 SV=2 - [MRP_HUMAN]	26.15	1	2	2	41	26.15	2	4	26.15	2	8	26.15	2	7	26.15	2	6	26.15	2	10	26.15	2	6
Q9Y2R5	28S ribosomal protein S17, mitochondrial OS=Homo sapiens GN=MRPS17 PE=1 SV=1 - [RT17_HUMAN]	26.15	1	3	3	25	26.15	2	6	15.38	1	2	26.15	2	5	15.38	1	6	25.38	2	3	26.15	3	3
P32322	Pyrroline-5-carboxylate reductase 1, mitochondrial OS=Homo sapiens GN=PYCR1 PE=1 SV=2 - [P5CR1_HUMAN]	26.02	1	5	7	29	18.18	3	6	9.09	2	3	26.02	6	7	16.93	5	6	13.79	3	4	12.23	3	3
Q969H8	UPF0556 protein C19orf10 OS=Homo sapiens GN=C19orf10 PE=1 SV=1 - [CS010_HUMAN]	26.01	1	5	5	63	26.01	5	13	26.01	5	11	26.01	5	11	26.01	4	7	26.01	5	13	26.01	4	8
Q8NC51	Plasminogen activator inhibitor 1 RNA-binding protein OS=Homo sapiens GN=SERBP1 PE=1 SV=2 - [PAIRB_HUMAN]	25.98	1	11	11	124	19.12	8	18	13.48	6	16	21.08	8	20	18.38	8	23	13.48	5	32	13.48	6	15
Q08752	Peptidyl-prolyl cis-trans isomerase D OS=Homo sapiens GN=PPID PE=1 SV=3 - [PPID_HUMAN]	25.95	1	11	13	89	22.97	8	17	24.05	7	11	25.95	12	19	25.95	9	14	25.95	10	16	21.08	6	12
Q9P0R6	GSK3-beta interaction protein OS=Homo sapiens GN=GSKIP PE=1 SV=2 - [GSKIP_HUMAN]	25.9	1	2	2	3	15.11	1	1										10.79	1	1	15.11	1	1
Q96AB3	Isochorismatase domain-containing protein 2, mitochondrial OS=Homo sapiens GN=ISOC2 PE=1 SV=1 - [ISOC2_HUMAN]	25.85	1	2	2	3	16.1	1	1				16.1	1	1	9.76	1	1
P09972	Fructose-bisphosphate aldolase C OS=Homo sapiens GN=ALDOC PE=1 SV=2 - [ALDOC_HUMAN]	25.82	1	2	10	119	15.66	7	18	21.98	8	21	15.66	7	17	15.66	8	19	19.51	7	21	21.98	8	23
Q9BTE1	Dynactin subunit 5 OS=Homo sapiens GN=DCTN5 PE=1 SV=1 - [DCTN5_HUMAN]	25.82	1	3	3	21	21.43	2	3	21.43	2	4	21.43	2	4	21.43	2	4	21.43	2	2	25.82	3	4
Q9NR56	Muscleblind-like protein 1 OS=Homo sapiens GN=MBNL1 PE=1 SV=2 - [MBNL1_HUMAN]	25.77	3	8	8	49	17.53	4	7	20.88	6	6	25.77	7	9	20.88	6	13	17.53	5	6	20.36	5	8
P51114	Fragile X mental retardation syndrome-related protein 1 OS=Homo sapiens GN=FXR1 PE=1 SV=3 - [FXR1_HUMAN]	25.76	1	11	13	104	20.61	9	19	21.74	8	12	21.42	9	14	25.28	12	21	23.99	11	23	21.1	9	15
Q8WVX3	Uncharacterized protein C4orf3 OS=Homo sapiens GN=C4orf3 PE=1 SV=2 - [CD003_HUMAN]	25.76	1	1	1	12	25.76	1	3	25.76	1	2	25.76	1	2	25.76	1	1	25.76	1	1	25.76	1	3
Q8TAE8	Growth arrest and DNA damage-inducible proteins-interacting protein 1 OS=Homo sapiens GN=GADD45GIP1 PE=1 SV=1 - [G45IP_HUMAN]	25.68	1	4	4	27	25.68	4	6	22.07	3	3	25.68	4	8	22.07	3	3	25.68	4	4	22.07	3	3
Q14764	Major vault protein OS=Homo sapiens GN=MVP PE=1 SV=4 - [MVP_HUMAN]	25.64	1	12	12	81	22.51	11	18	13.89	6	12	17.81	9	17	20.94	9	12	17.81	7	11	20.72	7	11
Q9NQ29	Putative RNA-binding protein Luc7-like 1 OS=Homo sapiens GN=LUC7L PE=1 SV=1 - [LUC7L_HUMAN]	25.61	1	5	8	48	20.75	6	8	19.68	6	8	20.75	6	7	20.75	5	8	20.22	6	7	20.75	6	10
P61163	Alpha-centractin OS=Homo sapiens GN=ACTR1A PE=1 SV=1 - [ACTZ_HUMAN]	25.53	1	3	7	49	16.49	3	5	16.49	3	5	25.53	7	12	20.21	6	15	16.49	4	9	10.9	2	3
Q7Z6I8	UPF0461 protein C5orf24 OS=Homo sapiens GN=C5orf24 PE=1 SV=1 - [CE024_HUMAN]	25.53	1	2	2	7	25.53	2	2	14.36	1	1	11.17	1	1	14.36	1	2	14.36	1	1
Q14980	Nuclear mitotic apparatus protein 1 OS=Homo sapiens GN=NUMA1 PE=1 SV=2 - [NUMA1_HUMAN]	25.48	1	38	38	247	15.37	22	40	13.85	19	39	18.16	24	45	18.77	30	48	15.46	23	41	15.22	23	34
Q14152	Eukaryotic translation initiation factor 3 subunit A OS=Homo sapiens GN=EIF3A PE=1 SV=1 - [EIF3A_HUMAN]	25.47	1	35	35	200	13.46	18	35	10.85	14	26	13.24	16	38	18.09	22	39	12.08	18	31	11	14	31
Q96A35	39S ribosomal protein L24, mitochondrial OS=Homo sapiens GN=MRPL24 PE=1 SV=1 - [RM24_HUMAN]	25.46	1	5	5	32	20.37	3	6	17.59	3	5	24.54	4	6	25.46	5	6	20.37	3	5	24.54	4	4
P00367	Glutamate dehydrogenase 1, mitochondrial OS=Homo sapiens GN=GLUD1 PE=1 SV=2 - [DHE3_HUMAN]	25.45	2	10	10	33	6.99	2	2	8.78	3	5	13.8	5	5	16.49	5	7	16.31	7	10	8.78	3	4
P62820	Ras-related protein Rab-1A OS=Homo sapiens GN=RAB1A PE=1 SV=3 - [RAB1A_HUMAN]	25.37	2	3	4	17	17.07	2	2	17.07	2	2	25.37	3	3	17.07	3	3	17.07	2	4	17.07	2	3
P04843	Dolichyl-diphosphooligosaccharide--protein glycosyltransferase subunit 1 OS=Homo sapiens GN=RPN1 PE=1 SV=1 - [RPN1_HUMAN]	25.37	1	13	13	86	16.47	8	13	16.64	8	12	18.29	10	18	22.57	11	16	18.29	9	15	18.29	9	12
P52292	Importin subunit alpha-1 OS=Homo sapiens GN=KPNA2 PE=1 SV=1 - [IMA1_HUMAN]	25.33	1	12	12	132	19.09	10	27	17.77	9	17	23.63	10	25	19.09	10	27	17.77	10	19	17.39	8	17
Q9H4G4	Golgi-associated plant pathogenesis-related protein 1 OS=Homo sapiens GN=GLIPR2 PE=1 SV=3 - [GAPR1_HUMAN]	25.32	1	3	3	3	11.04	1	1							8.44	1	1	14.29	1	1
Q9Y5J9	Mitochondrial import inner membrane translocase subunit Tim8 B OS=Homo sapiens GN=TIMM8B PE=1 SV=1 - [TIM8B_HUMAN]	25.3	1	2	2	8	13.25	1	3	25.3	2	2	13.25	1	2				12.05	1	1
Q9BYG3	MKI67 FHA domain-interacting nucleolar phosphoprotein OS=Homo sapiens GN=NIFK PE=1 SV=1 - [MK67I_HUMAN]	25.26	1	6	6	29	17.41	3	5	9.56	2	5	22.18	4	6	20.48	4	6	17.41	3	3	11.95	3	4
Q6EEV6	Small ubiquitin-related modifier 4 OS=Homo sapiens GN=SUMO4 PE=1 SV=2 - [SUMO4_HUMAN]	25.26	1	1	3	19	15.79	2	4	15.79	2	4	25.26	3	3	15.79	2	4	15.79	2	2	15.79	2	2
P05455	Lupus La protein OS=Homo sapiens GN=SSB PE=1 SV=2 - [LA_HUMAN]	25.25	1	14	14	119	20.59	8	20	17.16	7	16	24.75	12	21	25.25	12	23	24.75	11	21	22.79	12	18
Q9NQ50	39S ribosomal protein L40, mitochondrial OS=Homo sapiens GN=MRPL40 PE=1 SV=1 - [RM40_HUMAN]	25.24	1	4	4	19	17.96	2	2	15.05	2	2	17.96	2	2	25.24	4	7	17.96	2	3	22.33	3	3
Q9UKS6	Protein kinase C and casein kinase substrate in neurons protein 3 OS=Homo sapiens GN=PACSIN3 PE=1 SV=2 - [PACN3_HUMAN]	25.24	1	7	7	35	6.6	2	3	14.62	4	7	13.44	4	6	18.16	5	10	10.85	3	4	15.8	4	5
P20042	Eukaryotic translation initiation factor 2 subunit 2 OS=Homo sapiens GN=EIF2S2 PE=1 SV=2 - [IF2B_HUMAN]	25.23	1	10	10	92	12.01	5	12	16.82	6	13	15.62	6	18	20.42	7	17	16.82	6	15	24.92	9	17
O75494	Serine/arginine-rich splicing factor 10 OS=Homo sapiens GN=SRSF10 PE=1 SV=1 - [SRS10_HUMAN]	25.19	1	6	6	56	18.7	4	9	11.45	2	8	25.19	6	11	22.52	4	12	23.66	4	8	11.45	2	8
O95433	Activator of 90 kDa heat shock protein ATPase homolog 1 OS=Homo sapiens GN=AHSA1 PE=1 SV=1 - [AHSA1_HUMAN]	25.15	1	7	7	48	9.17	3	9	8.28	3	8	14.2	3	6	16.57	4	9	9.17	3	8	7.69	2	8
O95292	Vesicle-associated membrane protein-associated protein B/C OS=Homo sapiens GN=VAPB PE=1 SV=3 - [VAPB_HUMAN]	25.1	1	4	4	6	5.35	1	1				7.82	1	1	17.28	3	3				7.82	1	1
Q99459	Cell division cycle 5-like protein OS=Homo sapiens GN=CDC5L PE=1 SV=2 - [CDC5L_HUMAN]	25.06	1	13	13	57	6.98	5	6	11.22	6	6	11.22	6	7	23.32	11	16	11.97	6	11	17.58	8	11
Q99747	Gamma-soluble NSF attachment protein OS=Homo sapiens GN=NAPG PE=1 SV=1 - [SNAG_HUMAN]	25	1	5	5	28	9.94	2	2	20.83	4	5	16.03	3	3	14.1	3	5	9.94	2	6	16.03	3	7
Q9NRR3	CDC42 small effector protein 2 OS=Homo sapiens GN=CDC42SE2 PE=1 SV=1 - [C42S2_HUMAN]	25	1	2	2	11	25	1	1	25	1	3	25	1	2	25	1	3	22.62	1	1	25	1	1
Q9NQG5	Regulation of nuclear pre-mRNA domain-containing protein 1B OS=Homo sapiens GN=RPRD1B PE=1 SV=1 - [RPR1B_HUMAN]	24.85	1	4	4	18	9.82	1	2	10.43	2	3	19.33	3	5	19.33	3	3	19.33	3	4	4.91	1	1
O15116	U6 snRNA-associated Sm-like protein LSm1 OS=Homo sapiens GN=LSM1 PE=1 SV=1 - [LSM1_HUMAN]	24.81	1	2	2	15	12.03	1	2	24.81	2	4	12.03	1	2	12.03	1	3	12.03	1	2	12.03	1	2
Q99733	Nucleosome assembly protein 1-like 4 OS=Homo sapiens GN=NAP1L4 PE=1 SV=1 - [NP1L4_HUMAN]	24.8	1	8	10	95	15.2	7	15	12.27	5	12	18.4	7	15	18.93	9	20	17.07	8	16	15.2	7	17
O14979	Heterogeneous nuclear ribonucleoprotein D-like OS=Homo sapiens GN=HNRNPDL PE=1 SV=3 - [HNRDL_HUMAN]	24.76	1	13	16	190	22.14	11	32	23.1	11	29	22.14	12	28	24.76	14	35	23.1	13	37	23.1	11	29
O43583	Density-regulated protein OS=Homo sapiens GN=DENR PE=1 SV=2 - [DENR_HUMAN]	24.75	1	4	4	36	18.69	3	8	18.69	2	6	24.75	3	6	24.75	4	5	18.69	2	5	18.69	3	6
P29084	Transcription initiation factor IIE subunit beta OS=Homo sapiens GN=GTF2E2 PE=1 SV=1 - [T2EB_HUMAN]	24.74	1	4	4	28	17.18	3	7	6.19	1	1	9.62	2	4	21.31	3	5	17.18	3	6	13.75	2	5
Q9HD64	X antigen family member 1 OS=Homo sapiens GN=XAGE1A PE=2 SV=3 - [XAGE1_HUMAN]	24.69	1	1	1	1																24.69	1	1
Q9NQP4	Prefoldin subunit 4 OS=Homo sapiens GN=PFDN4 PE=1 SV=1 - [PFD4_HUMAN]	24.63	1	2	2	12	15.67	1	1	24.63	2	2	24.63	2	2	24.63	2	3	24.63	2	2	24.63	2	2
O75534	Cold shock domain-containing protein E1 OS=Homo sapiens GN=CSDE1 PE=1 SV=2 - [CSDE1_HUMAN]	24.56	1	22	22	122	18.3	14	16	15.16	11	16	22.18	18	28	23.56	20	26	18.42	15	20	16.67	11	16
O75896	Tumor suppressor candidate 2 OS=Homo sapiens GN=TUSC2 PE=1 SV=3 - [TUSC2_HUMAN]	24.55	1	1	1	8	24.55	1	2	24.55	1	1	24.55	1	1	24.55	1	2	24.55	1	1	24.55	1	1
Q9BX68	Histidine triad nucleotide-binding protein 2, mitochondrial OS=Homo sapiens GN=HINT2 PE=1 SV=1 - [HINT2_HUMAN]	24.54	1	3	3	19	22.09	2	2	22.09	2	3	24.54	3	3	22.09	2	3	22.09	2	3	22.09	2	5
Q9BW72	HIG1 domain family member 2A, mitochondrial OS=Homo sapiens GN=HIGD2A PE=1 SV=1 - [HIG2A_HUMAN]	24.53	1	4	4	37	24.53	4	5	24.53	4	10	24.53	4	8	24.53	3	5	24.53	3	4	24.53	4	5
Q9UJY1	Heat shock protein beta-8 OS=Homo sapiens GN=HSPB8 PE=1 SV=1 - [HSPB8_HUMAN]	24.49	1	3	3	22	24.49	3	5	11.22	2	4	11.22	2	3	11.22	2	3	24.49	3	5	11.22	2	2
P12429	Annexin A3 OS=Homo sapiens GN=ANXA3 PE=1 SV=3 - [ANXA3_HUMAN]	24.46	1	5	5	23	10.53	2	3	10.53	2	3	10.53	2	7	24.46	5	5	10.53	2	2	15.48	3	3
Q9BTZ2	Dehydrogenase/reductase SDR family member 4 OS=Homo sapiens GN=DHRS4 PE=1 SV=3 - [DHRS4_HUMAN]	24.46	3	5	5	23	5.04	1	1	11.51	2	2	14.75	3	3	14.75	3	4	21.22	3	9	11.51	2	4
Q9UNE7	E3 ubiquitin-protein ligase CHIP OS=Homo sapiens GN=STUB1 PE=1 SV=2 - [CHIP_HUMAN]	24.42	1	6	6	23	11.22	3	5	3.96	1	1	8.91	2	3	19.47	5	7	11.88	3	6	3.96	1	1
Q5BKZ1	DBIRD complex subunit ZNF326 OS=Homo sapiens GN=ZNF326 PE=1 SV=2 - [ZN326_HUMAN]	24.4	1	12	13	80	13.92	7	12	12.03	5	8	17.7	8	16	19.42	11	22	17.7	9	12	19.76	8	10
Q9H307	Pinin OS=Homo sapiens GN=PNN PE=1 SV=4 - [PININ_HUMAN]	24.27	1	16	16	92	15.48	8	11	14.37	8	15	18.41	11	16	23.01	12	20	17.29	11	17	15.48	9	13
Q9UNF1	Melanoma-associated antigen D2 OS=Homo sapiens GN=MAGED2 PE=1 SV=2 - [MAGD2_HUMAN]	24.26	1	13	13	99	19.47	8	16	18.98	7	12	19.31	8	15	20.63	10	17	19.14	7	18	21.95	8	21
Q15102	Platelet-activating factor acetylhydrolase IB subunit gamma OS=Homo sapiens GN=PAFAH1B3 PE=1 SV=1 - [PA1B3_HUMAN]	24.24	1	5	5	32	14.72	3	4	14.72	3	4	18.18	4	9	14.29	3	7	20.35	4	4	14.72	3	4
Q01581	Hydroxymethylglutaryl-CoA synthase, cytoplasmic OS=Homo sapiens GN=HMGCS1 PE=1 SV=2 - [HMCS1_HUMAN]	24.23	1	6	6	49	14.62	4	8	14.62	4	6	24.23	6	8	17.12	5	7	17.12	5	10	17.12	5	10
O00422	Histone deacetylase complex subunit SAP18 OS=Homo sapiens GN=SAP18 PE=1 SV=1 - [SAP18_HUMAN]	24.18	1	2	2	11	24.18	2	2	7.19	1	1	7.19	1	2	24.18	2	2	24.18	2	2	24.18	2	2
Q13642	Four and a half LIM domains protein 1 OS=Homo sapiens GN=FHL1 PE=1 SV=4 - [FHL1_HUMAN]	24.15	1	5	5	27	9.6	2	2	17.65	3	4	6.5	2	3	14.55	3	6	17.65	3	6	17.65	3	6
Q96HQ2	CDKN2AIP N-terminal-like protein OS=Homo sapiens GN=CDKN2AIPNL PE=1 SV=1 - [C2AIL_HUMAN]	24.14	1	2	2	10	15.52	1	1				15.52	1	2	15.52	1	3	24.14	2	2	15.52	1	2
P56378	6.8 kDa mitochondrial proteolipid OS=Homo sapiens GN=MP68 PE=1 SV=1 - [68MP_HUMAN]	24.14	1	2	2	4	20.69	1	1							20.69	1	1				24.14	2	2
Q13177	Serine/threonine-protein kinase PAK 2 OS=Homo sapiens GN=PAK2 PE=1 SV=3 - [PAK2_HUMAN]	24.05	2	7	8	75	19.66	5	11	19.66	5	6	19.08	5	15	24.05	8	22	16.98	5	11	17.37	5	10
O75822	Eukaryotic translation initiation factor 3 subunit J OS=Homo sapiens GN=EIF3J PE=1 SV=2 - [EIF3J_HUMAN]	24.03	1	5	5	24	4.26	1	2	4.26	1	2	13.95	3	7	18.99	3	4	18.99	3	5	10.85	2	4
O95168	NADH dehydrogenase [ubiquinone] 1 beta subcomplex subunit 4 OS=Homo sapiens GN=NDUFB4 PE=1 SV=3 - [NDUB4_HUMAN]	24.03	1	2	2	19	24.03	2	4	13.95	1	1	24.03	2	2	24.03	2	6	24.03	2	4	13.95	1	2
P62945	60S ribosomal protein L41 OS=Homo sapiens GN=RPL41 PE=1 SV=1 - [RL41_HUMAN]	24	1	1	1	1																24	1	1
P53597	Succinyl-CoA ligase [ADP/GDP-forming] subunit alpha, mitochondrial OS=Homo sapiens GN=SUCLG1 PE=1 SV=4 - [SUCA_HUMAN]	23.99	1	6	6	46	20.23	5	8	23.41	5	8	12.14	3	4	20.52	4	6	21.1	5	12	18.21	4	8
P57721	Poly(rC)-binding protein 3 OS=Homo sapiens GN=PCBP3 PE=2 SV=2 - [PCBP3_HUMAN]	23.99	1	1	7	103	19.41	5	16	19.41	5	14	20.22	5	20	15.63	5	18	19.41	6	19	19.41	5	16
O95777	U6 snRNA-associated Sm-like protein LSm8 OS=Homo sapiens GN=LSM8 PE=1 SV=3 - [LSM8_HUMAN]	23.96	1	1	1	9	23.96	1	1	23.96	1	1	23.96	1	2	23.96	1	1	23.96	1	3	23.96	1	1
Q9HC38	Glyoxalase domain-containing protein 4 OS=Homo sapiens GN=GLOD4 PE=1 SV=1 - [GLOD4_HUMAN]	23.96	1	6	6	26	18.85	4	4	6.71	2	4	15.97	4	7	18.85	4	5	13.74	3	4	10.22	2	2
Q96B54	Zinc finger protein 428 OS=Homo sapiens GN=ZNF428 PE=1 SV=2 - [ZN428_HUMAN]	23.94	1	3	3	34	7.45	1	4	16.49	2	5	7.45	1	3	23.94	3	7	16.49	2	9	16.49	2	6
O75083	WD repeat-containing protein 1 OS=Homo sapiens GN=WDR1 PE=1 SV=4 - [WDR1_HUMAN]	23.93	1	13	13	111	17	7	19	18.65	8	17	19.8	11	17	21.45	11	19	21.78	11	17	19.14	8	22
Q99627	COP9 signalosome complex subunit 8 OS=Homo sapiens GN=COPS8 PE=1 SV=1 - [CSN8_HUMAN]	23.92	1	3	3	20	10.05	1	4	10.05	1	2	23.92	3	3	23.92	3	5	10.05	1	2	16.75	2	4
P55010	Eukaryotic translation initiation factor 5 OS=Homo sapiens GN=EIF5 PE=1 SV=2 - [IF5_HUMAN]	23.9	1	11	11	54	8.12	4	6	5.57	3	5	16.01	7	12	23.9	10	14	16.94	6	9	15.08	6	8
Q9H0U6	39S ribosomal protein L18, mitochondrial OS=Homo sapiens GN=MRPL18 PE=1 SV=1 - [RM18_HUMAN]	23.89	1	3	3	19	17.22	2	2	17.78	2	4	11.11	1	2	23.89	3	4	17.22	2	3	17.22	2	4
B2RXH8	Heterogeneous nuclear ribonucleoprotein C-like 2 OS=Homo sapiens GN=HNRNPCL2 PE=2 SV=1 - [HNRC2_HUMAN]	23.89	3	1	11	106	8.53	7	15	8.53	6	15	14.33	8	21	21.5	10	21	8.53	7	18	8.53	7	16
Q92879	CUGBP Elav-like family member 1 OS=Homo sapiens GN=CELF1 PE=1 SV=2 - [CELF1_HUMAN]	23.87	1	10	13	82	21.81	8	13	19.14	6	12	23.66	10	15	21.81	9	16	23.66	10	12	21.81	8	14
P09110	3-ketoacyl-CoA thiolase, peroxisomal OS=Homo sapiens GN=ACAA1 PE=1 SV=2 - [THIK_HUMAN]	23.82	1	5	5	13	3.77	1	1	2.83	1	1	20.05	4	5	12.5	3	4	3.77	1	1	2.83	1	1
Q9NR46	Endophilin-B2 OS=Homo sapiens GN=SH3GLB2 PE=1 SV=1 - [SHLB2_HUMAN]	23.8	1	7	7	16	6.33	2	3	4.05	2	3	14.43	4	5	5.82	2	3	7.09	2	2
Q86VY4	Testis-specific Y-encoded-like protein 5 OS=Homo sapiens GN=TSPYL5 PE=1 SV=2 - [TSYL5_HUMAN]	23.74	1	6	6	72	17.27	4	9	13.19	3	11	14.15	4	14	19.66	5	12	17.27	4	15	18.71	4	11
P13667	Protein disulfide-isomerase A4 OS=Homo sapiens GN=PDIA4 PE=1 SV=2 - [PDIA4_HUMAN]	23.72	1	15	16	83	13.49	7	11	17.21	8	12	21.09	10	14	19.53	9	15	18.6	11	17	19.22	8	14
Q9BW91	ADP-ribose pyrophosphatase, mitochondrial OS=Homo sapiens GN=NUDT9 PE=1 SV=1 - [NUDT9_HUMAN]	23.71	1	6	6	18	15.43	4	4	3.14	1	1	14	3	4	22.29	5	7	3.14	1	1	3.14	1	1
Q9NX40	OCIA domain-containing protein 1 OS=Homo sapiens GN=OCIAD1 PE=1 SV=1 - [OCAD1_HUMAN]	23.67	1	5	5	34	20.41	3	5	20.41	3	6	23.67	4	8	20.41	3	6	23.67	4	5	20.41	4	4
Q00059	Transcription factor A, mitochondrial OS=Homo sapiens GN=TFAM PE=1 SV=1 - [TFAM_HUMAN]	23.58	1	7	7	38	15.85	4	6	15.85	3	3	18.7	5	8	23.58	6	9	23.58	6	8	15.85	3	4
P11441	Ubiquitin-like protein 4A OS=Homo sapiens GN=UBL4A PE=1 SV=1 - [UBL4A_HUMAN]	23.57	1	2	2	4				10.19	1	1	10.19	1	1				13.38	1	1	13.38	1	1
Q07866	Kinesin light chain 1 OS=Homo sapiens GN=KLC1 PE=1 SV=2 - [KLC1_HUMAN]	23.56	1	5	9	40	7.85	3	3	13.79	6	9	15.88	5	7	12.91	6	10	16.06	5	5	12.04	4	6
O43324	Eukaryotic translation elongation factor 1 epsilon-1 OS=Homo sapiens GN=EEF1E1 PE=1 SV=1 - [MCA3_HUMAN]	23.56	1	2	2	21	23.56	2	4	23.56	2	3	23.56	2	3	23.56	2	3	23.56	2	3	23.56	2	5
Q6P1L8	39S ribosomal protein L14, mitochondrial OS=Homo sapiens GN=MRPL14 PE=1 SV=1 - [RM14_HUMAN]	23.45	1	2	2	20	23.45	2	4	23.45	2	5	13.1	1	3	23.45	2	3	23.45	2	3	23.45	2	2
P05556	Integrin beta-1 OS=Homo sapiens GN=ITGB1 PE=1 SV=2 - [ITB1_HUMAN]	23.43	1	20	20	94	8.65	6	9	15.04	9	14	12.03	10	13	14.91	14	24	12.03	9	15	13.03	8	19
O75223	Gamma-glutamylcyclotransferase OS=Homo sapiens GN=GGCT PE=1 SV=1 - [GGCT_HUMAN]	23.4	1	3	3	6	9.04	1	1				15.43	2	2	17.02	2	2	6.38	1	1
P54886	Delta-1-pyrroline-5-carboxylate synthase OS=Homo sapiens GN=ALDH18A1 PE=1 SV=2 - [P5CS_HUMAN]	23.4	1	16	16	96	13.58	9	13	12.08	9	15	15.97	11	17	19.5	12	19	16.6	11	16	14.59	10	16
Q9P0M6	Core histone macro-H2A.2 OS=Homo sapiens GN=H2AFY2 PE=1 SV=3 - [H2AW_HUMAN]	23.39	1	3	6	20	7.8	1	1	1.61	1	1	13.98	3	4	13.98	4	11	18.01	3	3
Q14533	Keratin, type II cuticular Hb1 OS=Homo sapiens GN=KRT81 PE=1 SV=3 - [KRT81_HUMAN]	23.37	4	6	10	64	17.43	7	10	13.27	5	8	18.61	8	13	17.23	6	13	14.26	7	10	11.88	6	10
O15173	Membrane-associated progesterone receptor component 2 OS=Homo sapiens GN=PGRMC2 PE=1 SV=1 - [PGRC2_HUMAN]	23.32	1	4	4	34	15.7	3	7	23.32	3	6	23.32	4	4	23.32	4	7	15.7	3	6	23.32	3	4
P63208	S-phase kinase-associated protein 1 OS=Homo sapiens GN=SKP1 PE=1 SV=2 - [SKP1_HUMAN]	23.31	1	3	3	25	23.31	2	4	23.31	2	4	23.31	2	4	23.31	3	5	23.31	2	5	23.31	2	3
Q9NZZ3	Charged multivesicular body protein 5 OS=Homo sapiens GN=CHMP5 PE=1 SV=1 - [CHMP5_HUMAN]	23.29	1	5	5	19	20.09	4	4	23.29	3	4				16.89	2	2	23.29	3	5	23.29	3	4
Q9NTK5	Obg-like ATPase 1 OS=Homo sapiens GN=OLA1 PE=1 SV=2 - [OLA1_HUMAN]	23.23	1	7	7	48	12.12	4	7	18.94	4	6	22.73	6	9	22.73	6	8	19.44	6	9	14.14	5	9
Q16851	UTP--glucose-1-phosphate uridylyltransferase OS=Homo sapiens GN=UGP2 PE=1 SV=5 - [UGPA_HUMAN]	23.23	1	7	7	67	17.72	5	10	12.2	3	7	20.67	6	13	23.23	7	11	23.23	7	17	17.72	5	9
P52788	Spermine synthase OS=Homo sapiens GN=SMS PE=1 SV=2 - [SPSY_HUMAN]	23.22	1	6	6	26	15.03	3	3	3.01	1	1	11.2	4	4	23.22	6	8	16.94	5	8	7.65	2	2
P52209	6-phosphogluconate dehydrogenase, decarboxylating OS=Homo sapiens GN=PGD PE=1 SV=3 - [6PGD_HUMAN]	23.19	1	10	10	72	20.7	7	9	19.46	6	9	23.19	10	17	20.7	7	12	21.74	9	16	18.43	6	9
P27816	Microtubule-associated protein 4 OS=Homo sapiens GN=MAP4 PE=1 SV=3 - [MAP4_HUMAN]	23.18	1	25	25	209	12.93	12	23	13.72	13	51	13.89	14	28	19.97	21	44	15.1	15	30	15.36	15	33
O15305	Phosphomannomutase 2 OS=Homo sapiens GN=PMM2 PE=1 SV=1 - [PMM2_HUMAN]	23.17	1	5	5	39	20.33	3	6	20.33	4	7	23.17	5	8	20.33	4	4	20.33	4	6	20.33	4	8
Q15121	Astrocytic phosphoprotein PEA-15 OS=Homo sapiens GN=PEA15 PE=1 SV=2 - [PEA15_HUMAN]	23.08	1	4	4	17	10.77	2	2	23.08	2	2	23.08	3	4	20.77	2	3	10.77	2	4	10.77	2	2
Q15637	Splicing factor 1 OS=Homo sapiens GN=SF1 PE=1 SV=4 - [SF01_HUMAN]	23	1	12	12	93	15.49	8	13	10.17	6	12	15.02	8	18	18.15	9	19	19.72	9	19	18.47	8	12
Q6IAA8	Ragulator complex protein LAMTOR1 OS=Homo sapiens GN=LAMTOR1 PE=1 SV=2 - [LTOR1_HUMAN]	22.98	1	2	2	2							8.07	1	1	14.91	1	1
P27105	Erythrocyte band 7 integral membrane protein OS=Homo sapiens GN=STOM PE=1 SV=3 - [STOM_HUMAN]	22.92	1	4	4	14	11.11	2	2	4.51	1	2	16.32	3	6	4.51	1	1	4.51	1	1	11.11	2	2
Q8WUD4	Coiled-coil domain-containing protein 12 OS=Homo sapiens GN=CCDC12 PE=1 SV=1 - [CCD12_HUMAN]	22.89	1	3	3	6				5.42	1	1	5.42	1	1	22.89	3	3	5.42	1	1
Q16891	MICOS complex subunit MIC60 OS=Homo sapiens GN=IMMT PE=1 SV=1 - [MIC60_HUMAN]	22.82	1	10	10	54	13.98	6	8	9.37	5	6	18.6	8	11	16.49	8	12	13.85	7	8	11.21	6	9
O14548	Cytochrome c oxidase subunit 7A-related protein, mitochondrial OS=Homo sapiens GN=COX7A2L PE=1 SV=2 - [COX7R_HUMAN]	22.81	1	1	1	5	22.81	1	2				22.81	1	1	22.81	1	1	22.81	1	1
Q96C36	Pyrroline-5-carboxylate reductase 2 OS=Homo sapiens GN=PYCR2 PE=1 SV=1 - [P5CR2_HUMAN]	22.81	1	3	5	12	2.81	1	1	2.81	1	1	16.56	3	3	13.75	4	4	7.5	2	2	2.81	1	1
P17931	Galectin-3 OS=Homo sapiens GN=LGALS3 PE=1 SV=5 - [LEG3_HUMAN]	22.8	1	4	4	15	11.6	2	4	6	1	1	16	3	4	6	1	2	18.4	3	4
P48059	LIM and senescent cell antigen-like-containing domain protein 1 OS=Homo sapiens GN=LIMS1 PE=1 SV=4 - [LIMS1_HUMAN]	22.77	2	8	8	24	12.62	3	4	12.31	3	3	11.08	3	4	19.69	5	6	10.77	3	3	9.54	4	4
Q00688	Peptidyl-prolyl cis-trans isomerase FKBP3 OS=Homo sapiens GN=FKBP3 PE=1 SV=1 - [FKBP3_HUMAN]	22.77	1	7	7	58	20.09	5	7	20.09	5	9	20.09	5	12	20.09	6	11	18.75	5	9	22.77	6	10
Q9UFW8	CGG triplet repeat-binding protein 1 OS=Homo sapiens GN=CGGBP1 PE=1 SV=2 - [CGBP1_HUMAN]	22.75	1	3	3	28	11.98	2	4	11.98	2	4	11.98	2	4	22.75	3	5	11.98	2	6	11.98	2	5
P01111	GTPase NRas OS=Homo sapiens GN=NRAS PE=1 SV=1 - [RASN_HUMAN]	22.75	1	3	5	10				15.34	2	2	7.41	1	1	20.11	3	4	7.94	1	1	13.76	2	2
O95218	Zinc finger Ran-binding domain-containing protein 2 OS=Homo sapiens GN=ZRANB2 PE=1 SV=2 - [ZRAB2_HUMAN]	22.73	1	12	12	65	14.85	6	11	15.45	6	9	13.94	7	10	20.3	10	13	14.24	8	8	18.48	7	14
P51149	Ras-related protein Rab-7a OS=Homo sapiens GN=RAB7A PE=1 SV=1 - [RAB7A_HUMAN]	22.71	1	3	3	19	12.08	2	3	12.08	2	4	12.08	2	3	22.71	3	4	12.08	2	3	12.08	2	2
Q14566	DNA replication licensing factor MCM6 OS=Homo sapiens GN=MCM6 PE=1 SV=1 - [MCM6_HUMAN]	22.66	1	19	19	139	17.66	13	24	17.78	13	22	18.51	16	28	18.76	14	23	16.93	14	22	20.1	15	20
P46087	Probable 28S rRNA (cytosine(4447)-C(5))-methyltransferase OS=Homo sapiens GN=NOP2 PE=1 SV=2 - [NOP2_HUMAN]	22.66	1	22	22	119	18.1	13	24	15.27	10	12	18.1	17	28	21.8	15	22	17.49	12	15	17.24	13	18
P04183	Thymidine kinase, cytosolic OS=Homo sapiens GN=TK1 PE=1 SV=2 - [KITH_HUMAN]	22.65	1	4	4	37	17.95	3	6	6.41	1	3	22.65	4	10	17.95	3	7	17.95	2	4	17.95	3	7
Q8N1G4	Leucine-rich repeat-containing protein 47 OS=Homo sapiens GN=LRRC47 PE=1 SV=1 - [LRC47_HUMAN]	22.64	1	11	11	62	11.49	6	8	6.69	3	4	14.24	8	11	19.38	10	15	14.58	8	12	19.55	9	12
Q9Y3Y2	Chromatin target of PRMT1 protein OS=Homo sapiens GN=CHTOP PE=1 SV=2 - [CHTOP_HUMAN]	22.58	1	6	6	38	19.35	4	4	20.16	4	7	15.32	4	8	22.58	5	8	15.32	4	5	21.77	5	6
O60884	DnaJ homolog subfamily A member 2 OS=Homo sapiens GN=DNAJA2 PE=1 SV=1 - [DNJA2_HUMAN]	22.57	1	7	7	92	14.08	4	12	14.08	4	11	18.93	5	17	22.57	7	18	18.93	5	22	18.93	6	12
Q13573	SNW domain-containing protein 1 OS=Homo sapiens GN=SNW1 PE=1 SV=1 - [SNW1_HUMAN]	22.57	1	13	13	104	18.47	9	19	18.66	8	14	22.57	11	17	22.2	11	18	19.96	10	15	19.78	10	21
O43684	Mitotic checkpoint protein BUB3 OS=Homo sapiens GN=BUB3 PE=1 SV=1 - [BUB3_HUMAN]	22.56	1	8	8	51	17.68	5	5	12.8	3	5	14.94	4	10	19.82	7	9	14.63	4	15	12.8	3	7
Q9NQT4	Exosome complex component RRP46 OS=Homo sapiens GN=EXOSC5 PE=1 SV=1 - [EXOS5_HUMAN]	22.55	1	4	4	13	12.34	3	3				7.23	2	3	22.55	4	6	5.96	1	1
Q96CW1	AP-2 complex subunit mu OS=Homo sapiens GN=AP2M1 PE=1 SV=2 - [AP2M1_HUMAN]	22.53	1	7	7	24	5.98	2	2	5.98	2	3	12.87	4	7	12.18	4	5	12.18	4	5	4.83	2	2
Q8N684	Cleavage and polyadenylation specificity factor subunit 7 OS=Homo sapiens GN=CPSF7 PE=1 SV=1 - [CPSF7_HUMAN]	22.51	1	9	9	51	13.8	5	8	18.05	6	6	16.14	7	9	20.38	8	10	20.38	8	10	20.17	7	8
Q15417	Calponin-3 OS=Homo sapiens GN=CNN3 PE=1 SV=1 - [CNN3_HUMAN]	22.49	1	8	8	35	8.51	3	5	4.26	1	3	16.72	5	7	14.29	5	7	12.77	4	7	8.51	3	6
Q9NR30	Nucleolar RNA helicase 2 OS=Homo sapiens GN=DDX21 PE=1 SV=5 - [DDX21_HUMAN]	22.48	1	13	13	92	12.13	7	13	14.43	8	11	17.75	10	18	18.26	11	19	18.14	10	19	16.86	9	12
O95232	Luc7-like protein 3 OS=Homo sapiens GN=LUC7L3 PE=1 SV=2 - [LC7L3_HUMAN]	22.45	1	9	9	79	22.45	9	11	12.5	5	10	21.99	8	14	22.45	9	17	15.28	6	11	22.45	8	16
O95817	BAG family molecular chaperone regulator 3 OS=Homo sapiens GN=BAG3 PE=1 SV=3 - [BAG3_HUMAN]	22.43	1	6	6	42	8.7	2	2	14.43	4	6	15.83	4	8	18.09	4	7	15.3	4	8	22.43	6	11
P20618	Proteasome subunit beta type-1 OS=Homo sapiens GN=PSMB1 PE=1 SV=2 - [PSB1_HUMAN]	22.41	1	4	4	25	5.81	1	1	5.81	1	3	9.96	2	5	22.41	4	8	18.67	3	3	18.67	3	5
Q8WUH6	Transmembrane protein 263 OS=Homo sapiens GN=TMEM263 PE=1 SV=1 - [TM263_HUMAN]	22.41	1	2	2	2							8.62	1	1				22.41	1	1
Q9HD33	39S ribosomal protein L47, mitochondrial OS=Homo sapiens GN=MRPL47 PE=1 SV=2 - [RM47_HUMAN]	22.4	1	6	6	66	22.4	5	12	22.4	5	10	21.2	5	9	22.4	5	11	22.4	5	16	22.4	5	8
P50213	Isocitrate dehydrogenase [NAD] subunit alpha, mitochondrial OS=Homo sapiens GN=IDH3A PE=1 SV=1 - [IDH3A_HUMAN]	22.4	1	8	8	43	15.03	5	5	12.3	5	9	14.75	6	8	14.21	5	6	15.03	5	8	16.94	6	7
Q9BRA0	N-alpha-acetyltransferase 38, NatC auxiliary subunit OS=Homo sapiens GN=NAA38 PE=1 SV=1 - [LSMD1_HUMAN]	22.4	1	1	1	6	22.4	1	3				22.4	1	1				22.4	1	1	22.4	1	1
O43715	TP53-regulated inhibitor of apoptosis 1 OS=Homo sapiens GN=TRIAP1 PE=1 SV=1 - [TRIA1_HUMAN]	22.37	1	1	1	1													22.37	1	1
P28070	Proteasome subunit beta type-4 OS=Homo sapiens GN=PSMB4 PE=1 SV=4 - [PSB4_HUMAN]	22.35	1	2	2	5	13.26	1	1				22.35	2	3							13.26	1	1
Q96QD9	UAP56-interacting factor OS=Homo sapiens GN=FYTTD1 PE=1 SV=3 - [UIF_HUMAN]	22.33	1	4	4	17	6.6	2	3	3.46	1	1	6.6	2	2	22.33	4	5	6.6	2	3	12.26	2	3
Q9NWU5	39S ribosomal protein L22, mitochondrial OS=Homo sapiens GN=MRPL22 PE=1 SV=1 - [RM22_HUMAN]	22.33	1	3	3	9	8.74	1	1	8.74	1	1	8.74	1	1	12.62	2	3	18.45	2	2	8.74	1	1
P08133	Annexin A6 OS=Homo sapiens GN=ANXA6 PE=1 SV=3 - [ANXA6_HUMAN]	22.29	1	12	12	78	11.74	7	13	7.88	5	8	16.2	10	15	16.49	9	22	17.68	10	13	11.29	6	7
Q9BRT2	Ubiquinol-cytochrome-c reductase complex assembly factor 2 OS=Homo sapiens GN=UQCC2 PE=1 SV=1 - [UQCC2_HUMAN]	22.22	1	1	1	14	22.22	1	3	22.22	1	2	22.22	1	2	22.22	1	2	22.22	1	3	22.22	1	2
O14530	Thioredoxin domain-containing protein 9 OS=Homo sapiens GN=TXNDC9 PE=1 SV=2 - [TXND9_HUMAN]	22.12	1	5	5	18	20.8	3	3	10.18	1	1	16.81	3	3	16.81	2	4	15.49	3	5	10.18	1	2
Q96QR8	Transcriptional activator protein Pur-beta OS=Homo sapiens GN=PURB PE=1 SV=3 - [PURB_HUMAN]	22.12	1	6	7	28	9.62	3	5	6.73	2	3	12.82	4	4	19.87	6	6	15.71	4	6	10.58	3	4
Q9Y676	28S ribosomal protein S18b, mitochondrial OS=Homo sapiens GN=MRPS18B PE=1 SV=1 - [RT18B_HUMAN]	22.09	1	4	4	13				5.81	1	2	10.47	2	3	13.95	2	2	9.3	2	5	5.81	1	1
P61970	Nuclear transport factor 2 OS=Homo sapiens GN=NUTF2 PE=1 SV=1 - [NTF2_HUMAN]	22.05	1	2	2	17	22.05	2	3	22.05	2	3	22.05	2	2	22.05	2	3	22.05	2	3	22.05	2	3
Q3MHD2	Protein LSM12 homolog OS=Homo sapiens GN=LSM12 PE=1 SV=2 - [LSM12_HUMAN]	22.05	1	4	4	39	22.05	4	6	22.05	4	8	22.05	4	5	22.05	4	7	18.97	3	4	22.05	4	9
Q9UBT2	SUMO-activating enzyme subunit 2 OS=Homo sapiens GN=UBA2 PE=1 SV=2 - [SAE2_HUMAN]	22.03	1	8	8	31	11.56	4	4	12.34	4	5	15.63	6	7	12.03	5	6	11.88	4	6	6.41	3	3
Q15038	DAZ-associated protein 2 OS=Homo sapiens GN=DAZAP2 PE=1 SV=1 - [DAZP2_HUMAN]	22.02	1	1	1	3																22.02	1	3
Q6YN16	Hydroxysteroid dehydrogenase-like protein 2 OS=Homo sapiens GN=HSDL2 PE=1 SV=1 - [HSDL2_HUMAN]	22.01	1	6	6	30	8.85	3	4	15.79	4	7	16.03	4	4	20.33	5	6	15.79	4	6	11.48	3	3
O43504	Ragulator complex protein LAMTOR5 OS=Homo sapiens GN=LAMTOR5 PE=1 SV=1 - [LTOR5_HUMAN]	21.98	1	1	1	1										21.98	1	1
O60749	Sorting nexin-2 OS=Homo sapiens GN=SNX2 PE=1 SV=2 - [SNX2_HUMAN]	21.97	1	8	8	33	6.55	3	3	8.48	4	4	13.29	6	8	19.27	6	8	13.29	6	6	7.71	3	4
Q7L1Q6	Basic leucine zipper and W2 domain-containing protein 1 OS=Homo sapiens GN=BZW1 PE=1 SV=1 - [BZW1_HUMAN]	21.96	1	6	6	38	10.5	3	8	3.58	1	5	9.79	2	7	9.31	4	7	10.02	2	6	4.06	2	5
P23588	Eukaryotic translation initiation factor 4B OS=Homo sapiens GN=EIF4B PE=1 SV=2 - [IF4B_HUMAN]	21.93	1	13	13	82	14.24	8	13	9.49	5	8	14.24	8	17	19.97	10	22	14.24	8	12	13.42	7	10
Q8IXM3	39S ribosomal protein L41, mitochondrial OS=Homo sapiens GN=MRPL41 PE=1 SV=1 - [RM41_HUMAN]	21.9	1	2	2	10	7.3	1	1	7.3	1	3	21.9	2	2	21.9	2	2	7.3	1	1	7.3	1	1
Q9BY42	Protein RTF2 homolog OS=Homo sapiens GN=RTFDC1 PE=1 SV=3 - [RTF2_HUMAN]	21.9	1	5	5	10	2.94	1	1	2.94	1	1	2.94	1	1	14.38	4	4	10.46	2	2	2.94	1	1
Q9Y2S6	Translation machinery-associated protein 7 OS=Homo sapiens GN=TMA7 PE=1 SV=1 - [TMA7_HUMAN]	21.88	1	1	1	15	21.88	1	1	21.88	1	1	21.88	1	2	21.88	1	3	21.88	1	6	21.88	1	2
O75396	Vesicle-trafficking protein SEC22b OS=Homo sapiens GN=SEC22B PE=1 SV=4 - [SC22B_HUMAN]	21.86	1	3	3	29	20	2	2	20	2	6	20	2	6	21.86	3	3	20	2	6	20	2	6
O15400	Syntaxin-7 OS=Homo sapiens GN=STX7 PE=1 SV=4 - [STX7_HUMAN]	21.84	1	5	5	51	11.11	3	6	16.86	4	8	11.11	3	9	21.84	5	12	16.86	4	12	11.11	3	4
Q9P2E9	Ribosome-binding protein 1 OS=Homo sapiens GN=RRBP1 PE=1 SV=4 - [RRBP1_HUMAN]	21.84	1	26	26	174	11.56	12	23	11.42	12	24	15.6	18	34	16.17	18	30	15.39	18	29	14.47	14	34
P42025	Beta-centractin OS=Homo sapiens GN=ACTR1B PE=1 SV=1 - [ACTY_HUMAN]	21.81	1	1	5	38	16.49	3	5	16.49	3	6	21.81	5	8	16.49	4	10	16.49	3	5	10.9	2	4
Q9NZE8	39S ribosomal protein L35, mitochondrial OS=Homo sapiens GN=MRPL35 PE=1 SV=3 - [RM35_HUMAN]	21.81	1	4	4	9				6.38	1	1	11.17	2	2	13.3	2	3	6.91	1	1	11.17	2	2
O43396	Thioredoxin-like protein 1 OS=Homo sapiens GN=TXNL1 PE=1 SV=3 - [TXNL1_HUMAN]	21.8	1	7	7	43	20.42	5	7	17.99	5	7	20.42	5	6	17.99	5	7	20.42	5	10	19.38	5	6
O14745	Na(+)/H(+) exchange regulatory cofactor NHE-RF1 OS=Homo sapiens GN=SLC9A3R1 PE=1 SV=4 - [NHRF1_HUMAN]	21.79	1	6	6	32	17.88	5	5	10.34	3	4	12.01	4	7	17.88	5	9	9.5	3	4	8.94	2	3
Q9Y3E5	Peptidyl-tRNA hydrolase 2, mitochondrial OS=Homo sapiens GN=PTRH2 PE=1 SV=1 - [PTH2_HUMAN]	21.79	1	3	3	5							10.61	1	1	20.67	2	2	11.17	1	1	10.61	1	1
Q93052	Lipoma-preferred partner OS=Homo sapiens GN=LPP PE=1 SV=1 - [LPP_HUMAN]	21.73	1	7	7	39	8.01	3	7	12.42	4	5	14.38	5	7	17.81	6	8	10.46	4	8	12.42	4	4
Q8IY81	pre-rRNA processing protein FTSJ3 OS=Homo sapiens GN=FTSJ3 PE=1 SV=2 - [SPB1_HUMAN]	21.72	1	12	12	67	12.75	8	11	7.08	5	8	16.77	10	13	15.58	9	18	12.63	7	9	14.76	7	8
P49419	Alpha-aminoadipic semialdehyde dehydrogenase OS=Homo sapiens GN=ALDH7A1 PE=1 SV=5 - [AL7A1_HUMAN]	21.71	1	9	9	58	21.71	7	9	9.65	4	6	14.84	6	14	18.55	8	10	21.71	7	10	8.91	3	9
P60002	Transcription elongation factor 1 homolog OS=Homo sapiens GN=ELOF1 PE=2 SV=1 - [ELOF1_HUMAN]	21.69	1	1	1	1										21.69	1	1
Q9Y2W2	WW domain-binding protein 11 OS=Homo sapiens GN=WBP11 PE=1 SV=1 - [WBP11_HUMAN]	21.68	1	12	12	48	10.45	4	8	11.7	4	5	17.94	8	13	15.44	7	9	14.98	6	9	10.92	4	4
O00541	Pescadillo homolog OS=Homo sapiens GN=PES1 PE=1 SV=1 - [PESC_HUMAN]	21.6	1	8	8	61	14.12	5	14	14.8	5	6	14.12	6	10	14.12	5	13	12.76	5	10	8.5	4	8
P23368	NAD-dependent malic enzyme, mitochondrial OS=Homo sapiens GN=ME2 PE=1 SV=1 - [MAOM_HUMAN]	21.58	1	5	5	22	12.84	3	7	3.6	2	2	8.05	2	3	15.58	4	5	9.59	3	3	6.34	2	2
P51397	Death-associated protein 1 OS=Homo sapiens GN=DAP PE=1 SV=3 - [DAP1_HUMAN]	21.57	1	2	2	9	8.82	1	1	12.75	1	2	21.57	2	4	12.75	1	1	8.82	1	1
P62310	U6 snRNA-associated Sm-like protein LSm3 OS=Homo sapiens GN=LSM3 PE=1 SV=2 - [LSM3_HUMAN]	21.57	1	2	2	20	21.57	2	3	21.57	1	2	21.57	2	5	21.57	1	4	21.57	2	3	21.57	2	3
Q12962	Transcription initiation factor TFIID subunit 10 OS=Homo sapiens GN=TAF10 PE=1 SV=1 - [TAF10_HUMAN]	21.56	1	2	2	2							10.09	1	1							11.47	1	1
Q92917	G patch domain and KOW motifs-containing protein OS=Homo sapiens GN=GPKOW PE=1 SV=2 - [GPKOW_HUMAN]	21.43	1	6	6	36	7.77	3	7	6.3	2	5	11.34	3	5	15.76	4	7	6.3	2	4	14.92	4	8
Q13162	Peroxiredoxin-4 OS=Homo sapiens GN=PRDX4 PE=1 SV=1 - [PRDX4_HUMAN]	21.4	1	5	6	68	9.59	3	15	9.59	3	10	20.66	4	10	20.66	5	12	17.34	4	12	17.34	3	9
P23434	Glycine cleavage system H protein, mitochondrial OS=Homo sapiens GN=GCSH PE=1 SV=2 - [GCSH_HUMAN]	21.39	1	4	4	42	21.39	4	5	21.39	4	4	21.39	4	8	21.39	4	9	21.39	4	6	21.39	4	10
P27695	DNA-(apurinic or apyrimidinic site) lyase OS=Homo sapiens GN=APEX1 PE=1 SV=2 - [APEX1_HUMAN]	21.38	1	7	7	59	21.38	7	10	20.13	4	4	16.04	5	13	21.38	6	9	21.38	7	13	21.38	6	10
Q99536	Synaptic vesicle membrane protein VAT-1 homolog OS=Homo sapiens GN=VAT1 PE=1 SV=2 - [VAT1_HUMAN]	21.37	1	6	6	40	14.76	5	8	14.76	5	7	14.76	5	5	14.76	5	7	21.37	6	6	14.76	5	7
P08579	U2 small nuclear ribonucleoprotein B'' OS=Homo sapiens GN=SNRPB2 PE=1 SV=1 - [RU2B_HUMAN]	21.33	1	4	4	23	15.56	2	2	15.56	3	4	15.56	3	4	21.33	4	6	15.56	2	3	15.56	3	4
P18615	Negative elongation factor E OS=Homo sapiens GN=NELFE PE=1 SV=3 - [NELFE_HUMAN]	21.32	1	6	6	35	13.68	4	7	7.89	2	4	15.26	4	6	21.32	6	10	8.95	3	4	13.68	4	4
Q01082	Spectrin beta chain, non-erythrocytic 1 OS=Homo sapiens GN=SPTBN1 PE=1 SV=2 - [SPTB2_HUMAN]	21.28	4	40	40	248	13.71	23	33	13.37	22	41	14.64	28	42	16.07	31	51	15.4	28	40	14.26	25	41
O75821	Eukaryotic translation initiation factor 3 subunit G OS=Homo sapiens GN=EIF3G PE=1 SV=2 - [EIF3G_HUMAN]	21.25	1	4	4	16	3.13	1	1				17.5	3	3	17.19	3	8	4.06	1	4
O43809	Cleavage and polyadenylation specificity factor subunit 5 OS=Homo sapiens GN=NUDT21 PE=1 SV=1 - [CPSF5_HUMAN]	21.15	1	2	2	26	21.15	2	3	21.15	2	4	21.15	2	5	21.15	2	6	21.15	2	6	21.15	2	2
Q04637	Eukaryotic translation initiation factor 4 gamma 1 OS=Homo sapiens GN=EIF4G1 PE=1 SV=4 - [IF4G1_HUMAN]	21.14	1	20	30	227	15.51	17	26	17.95	23	37	17.2	22	41	19.51	26	47	18.76	23	35	18.76	21	41
Q6ZYL4	General transcription factor IIH subunit 5 OS=Homo sapiens GN=GTF2H5 PE=1 SV=1 - [TF2H5_HUMAN]	21.13	1	1	1	2				21.13	1	1							21.13	1	1
Q9H0S4	Probable ATP-dependent RNA helicase DDX47 OS=Homo sapiens GN=DDX47 PE=1 SV=1 - [DDX47_HUMAN]	21.1	1	8	8	50	14.29	5	11	14.29	5	7	19.12	5	5	16.26	5	10	19.56	6	10	17.58	5	7
P52926	High mobility group protein HMGI-C OS=Homo sapiens GN=HMGA2 PE=1 SV=1 - [HMGA2_HUMAN]	21.1	1	1	1	4				21.1	1	1	21.1	1	1	21.1	1	2
Q4U2R6	39S ribosomal protein L51, mitochondrial OS=Homo sapiens GN=MRPL51 PE=1 SV=1 - [RM51_HUMAN]	21.09	1	2	2	23	21.09	2	3	9.38	1	3	21.09	2	2	21.09	2	5	21.09	2	2	21.09	2	8
P30566	Adenylosuccinate lyase OS=Homo sapiens GN=ADSL PE=1 SV=2 - [PUR8_HUMAN]	21.07	1	6	6	24	8.47	2	2	4.55	1	2	12.19	4	4	21.07	6	10	11.98	3	3	8.47	2	3
Q9UMX0	Ubiquilin-1 OS=Homo sapiens GN=UBQLN1 PE=1 SV=2 - [UBQL1_HUMAN]	21.05	1	3	9	64	21.05	7	10	10.36	6	12	16.13	6	10	10.36	7	12	21.05	7	9	10.36	6	11
Q9Y2B9	cAMP-dependent protein kinase inhibitor gamma OS=Homo sapiens GN=PKIG PE=2 SV=1 - [IPKG_HUMAN]	21.05	1	1	1	1																21.05	1	1
Q08211	ATP-dependent RNA helicase A OS=Homo sapiens GN=DHX9 PE=1 SV=4 - [DHX9_HUMAN]	21.02	1	22	22	133	14.72	15	23	12.68	13	19	16.85	17	25	17.24	16	21	16.69	17	23	13.62	13	22
Q9NUQ9	Protein FAM49B OS=Homo sapiens GN=FAM49B PE=1 SV=1 - [FA49B_HUMAN]	20.99	2	6	6	46	20.37	4	7	14.81	3	6	20.37	4	4	20.99	6	14	20.99	5	8	20.37	5	7
P30481	HLA class I histocompatibility antigen, B-44 alpha chain OS=Homo sapiens GN=HLA-B PE=1 SV=1 - [1B44_HUMAN]	20.99	35	1	6	35	11.6	3	6	16.57	4	5	11.6	3	4	20.99	5	9	15.75	4	6	11.6	3	5
A8MT69	Centromere protein X OS=Homo sapiens GN=STRA13 PE=1 SV=1 - [CENPX_HUMAN]	20.99	1	1	1	2				20.99	1	1				20.99	1	1
O15446	DNA-directed RNA polymerase I subunit RPA34 OS=Homo sapiens GN=CD3EAP PE=1 SV=1 - [RPA34_HUMAN]	20.98	1	5	5	45	10	3	4	16.27	4	7	20.98	5	13	20.98	5	8	20.98	4	6	16.27	4	7
Q14320	Protein FAM50A OS=Homo sapiens GN=FAM50A PE=1 SV=2 - [FA50A_HUMAN]	20.94	1	6	6	39	12.68	3	6	12.68	4	6	8.55	3	8	18.58	5	8	12.68	4	5	10.91	4	6
Q13740	CD166 antigen OS=Homo sapiens GN=ALCAM PE=1 SV=2 - [CD166_HUMAN]	20.93	1	9	9	24	5.32	2	2	1.89	1	1	11.32	4	4	16.81	7	9	12.35	5	6	4.8	2	2
P30519	Heme oxygenase 2 OS=Homo sapiens GN=HMOX2 PE=1 SV=2 - [HMOX2_HUMAN]	20.89	1	5	5	26	14.24	3	5	15.51	4	5	15.51	4	4	14.24	3	3	19.62	4	6	14.24	3	3
Q9P016	Thymocyte nuclear protein 1 OS=Homo sapiens GN=THYN1 PE=1 SV=1 - [THYN1_HUMAN]	20.89	1	3	3	3	11.11	2	2										9.78	1	1
Q13951	Core-binding factor subunit beta OS=Homo sapiens GN=CBFB PE=1 SV=2 - [PEBB_HUMAN]	20.88	1	4	4	28	12.09	3	4	12.09	3	4	12.09	3	5	20.88	4	7	12.09	3	4	12.09	3	4
Q4VC31	Coiled-coil domain-containing protein 58 OS=Homo sapiens GN=CCDC58 PE=1 SV=1 - [CCD58_HUMAN]	20.83	1	2	2	2										20.83	2	2
Q8N163	Cell cycle and apoptosis regulator protein 2 OS=Homo sapiens GN=CCAR2 PE=1 SV=2 - [CCAR2_HUMAN]	20.8	1	11	11	48	4.01	3	3	9.32	4	5	14.19	7	8	16.14	8	14	13.65	6	9	14.08	6	9
Q15398	Disks large-associated protein 5 OS=Homo sapiens GN=DLGAP5 PE=1 SV=2 - [DLGP5_HUMAN]	20.8	2	13	13	70	11.58	7	9	11.23	7	9	10.87	6	13	18.79	11	16	14.18	9	12	11.58	7	11
O00429	Dynamin-1-like protein OS=Homo sapiens GN=DNM1L PE=1 SV=2 - [DNM1L_HUMAN]	20.79	1	9	9	56	5.57	3	7	12.09	4	9	10.87	4	6	16.98	8	12	13.72	6	11	13.72	5	11
Q9HD15	Steroid receptor RNA activator 1 OS=Homo sapiens GN=SRA1 PE=1 SV=1 - [SRA1_HUMAN]	20.76	1	3	3	17	8.05	1	2	20.76	3	3	20.76	3	6	20.76	2	2	8.05	1	1	20.76	2	3
P78417	Glutathione S-transferase omega-1 OS=Homo sapiens GN=GSTO1 PE=1 SV=2 - [GSTO1_HUMAN]	20.75	1	6	6	68	19.92	4	16	12.45	4	7	20.75	6	17	19.92	4	6	17.01	3	11	19.92	4	11
Q9UII2	ATPase inhibitor, mitochondrial OS=Homo sapiens GN=ATPIF1 PE=1 SV=1 - [ATIF1_HUMAN]	20.75	1	2	2	10	7.55	1	2	7.55	1	1	7.55	1	5	13.21	1	1	7.55	1	1
Q9BS26	Endoplasmic reticulum resident protein 44 OS=Homo sapiens GN=ERP44 PE=1 SV=1 - [ERP44_HUMAN]	20.69	1	6	6	34	8.13	3	5	12.56	4	8	10.59	4	4	18.23	5	8	18.23	5	5	12.56	4	4
P07339	Cathepsin D OS=Homo sapiens GN=CTSD PE=1 SV=1 - [CATD_HUMAN]	20.63	1	6	6	35	11.17	3	5	7.04	2	4	11.17	3	7	20.63	6	9	7.04	2	4	11.17	3	6
Q8IVT2	Mitotic interactor and substrate of PLK1 OS=Homo sapiens GN=MISP PE=1 SV=1 - [MISP_HUMAN]	20.62	1	8	8	28	10.6	4	4	1.33	1	1	3.53	2	3	19.29	7	10	2.36	1	2	11.19	5	8
O60232	Sjoegren syndrome/scleroderma autoantigen 1 OS=Homo sapiens GN=SSSCA1 PE=1 SV=1 - [SSA27_HUMAN]	20.6	1	3	3	53	20.6	3	13	20.6	3	7	20.6	3	6	20.6	3	11	20.6	3	8	16.58	2	8
Q13595	Transformer-2 protein homolog alpha OS=Homo sapiens GN=TRA2A PE=1 SV=1 - [TRA2A_HUMAN]	20.57	1	5	6	29	16.67	5	5	6.03	2	4	17.02	5	6	9.57	3	6	9.57	3	3	13.12	4	5
Q8NFH5	Nucleoporin NUP53 OS=Homo sapiens GN=NUP35 PE=1 SV=1 - [NUP53_HUMAN]	20.55	1	3	3	23	9.82	2	2	9.82	2	4	9.82	2	4	20.55	3	5	20.55	3	5	9.82	2	3
Q9UNZ2	NSFL1 cofactor p47 OS=Homo sapiens GN=NSFL1C PE=1 SV=2 - [NSF1C_HUMAN]	20.54	1	6	6	39	14.32	4	6	7.57	2	3	14.32	4	6	20.54	6	11	14.32	5	7	7.57	2	6
Q14919	Dr1-associated corepressor OS=Homo sapiens GN=DRAP1 PE=1 SV=3 - [NC2A_HUMAN]	20.49	1	5	5	45	20.49	5	9	20	4	6	20	4	10	20	4	8	20.49	4	5	20.49	4	7
Q06323	Proteasome activator complex subunit 1 OS=Homo sapiens GN=PSME1 PE=1 SV=1 - [PSME1_HUMAN]	20.48	1	3	3	7							10.04	1	1	14.46	2	2	10.04	1	3	6.02	1	1
Q9BT23	LIM domain-containing protein 2 OS=Homo sapiens GN=LIMD2 PE=1 SV=1 - [LIMD2_HUMAN]	20.47	1	1	1	10	20.47	1	3	20.47	1	1	20.47	1	3	20.47	1	1	20.47	1	1	20.47	1	1
Q9H0L4	Cleavage stimulation factor subunit 2 tau variant OS=Homo sapiens GN=CSTF2T PE=1 SV=1 - [CSTFT_HUMAN]	20.45	1	2	8	47	13.64	6	9	13.96	4	5	12.01	4	9	20.45	7	11	13.96	5	8	9.42	3	5
Q01658	Protein Dr1 OS=Homo sapiens GN=DR1 PE=1 SV=1 - [NC2B_HUMAN]	20.45	1	2	2	14	20.45	2	3	8.52	1	2	8.52	1	3	11.93	1	1	20.45	2	2	20.45	2	3
O75935	Dynactin subunit 3 OS=Homo sapiens GN=DCTN3 PE=1 SV=1 - [DCTN3_HUMAN]	20.43	1	2	2	18	20.43	2	3				20.43	2	6	20.43	2	4	20.43	2	3	12.37	1	2
O15514	DNA-directed RNA polymerase II subunit RPB4 OS=Homo sapiens GN=POLR2D PE=1 SV=1 - [RPB4_HUMAN]	20.42	1	2	2	5	7.75	1	1	7.75	1	1	7.75	1	1	12.68	1	1	7.75	1	1
Q9NQX3	Gephyrin OS=Homo sapiens GN=GPHN PE=1 SV=1 - [GEPH_HUMAN]	20.38	1	9	9	44	10.33	5	6	12.77	6	8	15.49	7	8	10.33	4	4	16.44	7	11	13.04	5	7
P55809	Succinyl-CoA:3-ketoacid coenzyme A transferase 1, mitochondrial OS=Homo sapiens GN=OXCT1 PE=1 SV=1 - [SCOT1_HUMAN]	20.38	1	10	10	88	19.42	9	16	15.77	7	18	20	9	20	16.54	8	15	18.46	8	11	15.77	7	8
P58546	Myotrophin OS=Homo sapiens GN=MTPN PE=1 SV=2 - [MTPN_HUMAN]	20.34	1	2	2	8	20.34	1	1	20.34	1	1	20.34	2	2	20.34	2	2	20.34	1	1	20.34	1	1
Q9Y314	Nitric oxide synthase-interacting protein OS=Homo sapiens GN=NOSIP PE=1 SV=1 - [NOSIP_HUMAN]	20.27	1	4	4	23	7.64	2	3	7.64	2	3	13.62	3	5	20.27	4	5	13.62	3	4	17.94	3	3
Q13158	FAS-associated death domain protein OS=Homo sapiens GN=FADD PE=1 SV=1 - [FADD_HUMAN]	20.19	1	2	2	8	8.65	1	2				20.19	2	3	8.65	1	2	8.65	1	1
Q9BTT0	Acidic leucine-rich nuclear phosphoprotein 32 family member E OS=Homo sapiens GN=ANP32E PE=1 SV=1 - [AN32E_HUMAN]	20.15	1	6	6	22	13.06	3	3	9.33	2	3	15.67	3	3	18.28	4	7	13.06	3	5	2.99	1	1
O75955	Flotillin-1 OS=Homo sapiens GN=FLOT1 PE=1 SV=3 - [FLOT1_HUMAN]	20.14	1	6	6	33	13.11	3	3	13.11	3	5	20.14	6	8	13.11	3	5	16.16	4	8	13.11	4	4
P05023	Sodium/potassium-transporting ATPase subunit alpha-1 OS=Homo sapiens GN=ATP1A1 PE=1 SV=1 - [AT1A1_HUMAN]	20.14	5	18	18	148	14.66	12	23	17.6	13	25	13.39	14	26	15.64	14	26	15.25	13	18	20.04	15	30
Q00610	Clathrin heavy chain 1 OS=Homo sapiens GN=CLTC PE=1 SV=5 - [CLH1_HUMAN]	20.12	2	29	29	184	9.79	16	27	11.1	18	28	15.94	19	35	12.24	18	28	10.87	17	33	9.55	16	33
Q8TCA0	Leucine-rich repeat-containing protein 20 OS=Homo sapiens GN=LRRC20 PE=2 SV=1 - [LRC20_HUMAN]	20.11	1	2	2	3				7.61	1	1	12.5	1	1	12.5	1	1
P60228	Eukaryotic translation initiation factor 3 subunit E OS=Homo sapiens GN=EIF3E PE=1 SV=1 - [EIF3E_HUMAN]	20	1	9	9	60	6.97	4	9	6.97	3	6	15.51	7	11	15.73	5	11	11.24	7	13	11.24	5	10
Q8N6R1	Stress-associated endoplasmic reticulum protein 2 OS=Homo sapiens GN=SERP2 PE=2 SV=1 - [SERP2_HUMAN]	20	2	1	1	2							20	1	1				20	1	1
O96001	Protein phosphatase 1 regulatory subunit 17 OS=Homo sapiens GN=PPP1R17 PE=1 SV=2 - [PPR17_HUMAN]	20	1	1	1	1										20	1	1
O14964	Hepatocyte growth factor-regulated tyrosine kinase substrate OS=Homo sapiens GN=HGS PE=1 SV=1 - [HGS_HUMAN]	19.95	1	12	12	63	11.33	7	8	15.44	9	13	15.32	9	11	13.26	8	12	11.58	7	9	11.58	7	10
Q9BT78	COP9 signalosome complex subunit 4 OS=Homo sapiens GN=COPS4 PE=1 SV=1 - [CSN4_HUMAN]	19.95	1	5	5	23	7.14	2	2	4.68	1	2	7.14	2	3	19.95	5	8	19.95	5	5	7.64	2	3
P04040	Catalase OS=Homo sapiens GN=CAT PE=1 SV=3 - [CATA_HUMAN]	19.92	1	6	6	37	8.73	3	5	14.04	4	4	16.89	5	10	8.73	3	6	17.08	5	7	14.04	4	5
P55884	Eukaryotic translation initiation factor 3 subunit B OS=Homo sapiens GN=EIF3B PE=1 SV=3 - [EIF3B_HUMAN]	19.9	1	20	20	129	16.09	15	25	15.23	13	22	19.04	16	23	14.62	13	18	15.11	14	19	12.9	12	22
Q99436	Proteasome subunit beta type-7 OS=Homo sapiens GN=PSMB7 PE=1 SV=1 - [PSB7_HUMAN]	19.86	1	7	7	71	19.86	7	16	19.86	6	10	19.86	7	10	19.86	7	13	19.86	7	10	19.86	7	12
Q9Y3B9	RRP15-like protein OS=Homo sapiens GN=RRP15 PE=1 SV=2 - [RRP15_HUMAN]	19.86	1	5	5	21	11.35	3	3	11.35	2	4	11.35	2	2	19.86	4	4	11.35	3	4	11.35	3	4
Q9UMS4	Pre-mRNA-processing factor 19 OS=Homo sapiens GN=PRPF19 PE=1 SV=1 - [PRP19_HUMAN]	19.84	1	10	10	51	13.69	5	5	13.89	5	7	17.06	7	9	17.06	7	12	17.46	7	10	15.67	6	8
Q9UBR2	Cathepsin Z OS=Homo sapiens GN=CTSZ PE=1 SV=1 - [CATZ_HUMAN]	19.8	1	4	4	31	19.8	4	4	3.96	1	1	13.2	3	9	19.8	4	6	13.2	3	4	13.2	3	7
Q8N8S7	Protein enabled homolog OS=Homo sapiens GN=ENAH PE=1 SV=2 - [ENAH_HUMAN]	19.8	1	7	7	44	10.15	3	9	10.15	3	6	14.72	5	11	12.69	4	7	10.15	3	4	12.69	4	7
Q14683	Structural maintenance of chromosomes protein 1A OS=Homo sapiens GN=SMC1A PE=1 SV=2 - [SMC1A_HUMAN]	19.79	1	20	20	113	11.52	12	25	10.62	11	15	12.49	11	22	13.79	13	20	8.19	8	10	15	14	21
Q9HD34	LYR motif-containing protein 4 OS=Homo sapiens GN=LYRM4 PE=1 SV=1 - [LYRM4_HUMAN]	19.78	1	1	1	3	19.78	1	2				19.78	1	1
P07814	Bifunctional glutamate/proline--tRNA ligase OS=Homo sapiens GN=EPRS PE=1 SV=5 - [SYEP_HUMAN]	19.78	1	24	24	131	15.08	15	23	12.04	12	20	15.81	15	28	16.2	18	26	12.24	14	17	9.92	11	17
Q16517	Neuronatin OS=Homo sapiens GN=NNAT PE=2 SV=1 - [NNAT_HUMAN]	19.75	1	1	1	1							19.75	1	1
P14314	Glucosidase 2 subunit beta OS=Homo sapiens GN=PRKCSH PE=1 SV=2 - [GLU2B_HUMAN]	19.7	1	15	15	96	13.83	11	17	12.31	9	15	14.77	11	15	15.15	11	18	12.5	11	19	11.36	9	12
Q9NR50	Translation initiation factor eIF-2B subunit gamma OS=Homo sapiens GN=EIF2B3 PE=1 SV=1 - [EI2BG_HUMAN]	19.69	1	7	7	22	6.19	3	3	3.76	1	1	7.08	3	4	7.3	3	4	9.96	3	6	7.74	3	4
Q14694	Ubiquitin carboxyl-terminal hydrolase 10 OS=Homo sapiens GN=USP10 PE=1 SV=2 - [UBP10_HUMAN]	19.67	1	7	7	19	2.26	1	1	7.77	3	3	5.14	2	2	11.78	4	4	9.02	3	5	9.65	3	4
Q96PU8	Protein quaking OS=Homo sapiens GN=QKI PE=1 SV=1 - [QKI_HUMAN]	19.65	1	5	5	27	17.6	4	4	11.73	3	6	9.68	2	4	9.68	2	4	11.73	3	6	9.68	2	3
Q99661	Kinesin-like protein KIF2C OS=Homo sapiens GN=KIF2C PE=1 SV=2 - [KIF2C_HUMAN]	19.59	1	8	10	72	15.59	7	11	17.52	8	14	17.52	8	9	17.66	9	14	15.59	7	12	15.59	7	12
Q8WUF5	RelA-associated inhibitor OS=Homo sapiens GN=PPP1R13L PE=1 SV=4 - [IASPP_HUMAN]	19.57	1	9	9	34	5.8	3	3	4.35	2	3	14.61	6	9	10.75	6	10	8.21	3	3	7.97	4	6
Q9NYJ1	Cytochrome c oxidase assembly factor 4 homolog, mitochondrial OS=Homo sapiens GN=COA4 PE=1 SV=2 - [COA4_HUMAN]	19.54	1	1	1	2							19.54	1	1	19.54	1	1
O95139	NADH dehydrogenase [ubiquinone] 1 beta subcomplex subunit 6 OS=Homo sapiens GN=NDUFB6 PE=1 SV=3 - [NDUB6_HUMAN]	19.53	1	1	1	11	19.53	1	3	19.53	1	2	19.53	1	1	19.53	1	2	19.53	1	1	19.53	1	2
Q9BQS6	Heat shock protein beta-9 OS=Homo sapiens GN=HSPB9 PE=1 SV=1 - [HSPB9_HUMAN]	19.5	1	1	1	1							19.5	1	1
P30046	D-dopachrome decarboxylase OS=Homo sapiens GN=DDT PE=1 SV=3 - [DOPD_HUMAN]	19.49	1	3	3	18	19.49	3	4	12.71	2	2	19.49	2	4	19.49	3	3	19.49	3	3	12.71	2	2
O75348	V-type proton ATPase subunit G 1 OS=Homo sapiens GN=ATP6V1G1 PE=1 SV=3 - [VATG1_HUMAN]	19.49	1	2	2	16	11.86	1	3	11.86	1	2	11.86	1	2	19.49	2	4	19.49	2	2	11.86	1	3
P07602	Prosaposin OS=Homo sapiens GN=PSAP PE=1 SV=2 - [SAP_HUMAN]	19.47	1	7	7	35	14.5	5	6	8.97	3	3	11.83	5	9	16.6	5	9	3.24	1	2	8.97	3	6
Q9H0H5	Rac GTPase-activating protein 1 OS=Homo sapiens GN=RACGAP1 PE=1 SV=1 - [RGAP1_HUMAN]	19.46	1	9	9	51	9.34	4	4	10.92	4	6	11.55	5	9	17.88	7	15	16.93	7	13	5.06	2	4
Q9UKX7	Nuclear pore complex protein Nup50 OS=Homo sapiens GN=NUP50 PE=1 SV=2 - [NUP50_HUMAN]	19.44	1	5	5	27	8.12	2	3	12.61	3	3	10.47	3	6	19.44	5	7	10.47	3	3	10.26	2	5
P53634	Dipeptidyl peptidase 1 OS=Homo sapiens GN=CTSC PE=1 SV=2 - [CATC_HUMAN]	19.44	1	5	5	34	14.47	3	4	7.56	3	6	12.53	4	9	14.47	4	7	7.56	3	3	14.47	4	5
O60942	mRNA-capping enzyme OS=Homo sapiens GN=RNGTT PE=1 SV=1 - [MCE1_HUMAN]	19.43	1	11	11	42	12.9	7	11	14.24	8	16	17.92	9	15
O75477	Erlin-1 OS=Homo sapiens GN=ERLIN1 PE=1 SV=1 - [ERLN1_HUMAN]	19.36	2	4	4	27	6.65	2	4	10.69	2	4	13.87	3	7	13.87	3	4	19.36	4	5	13.87	3	3
Q9P258	Protein RCC2 OS=Homo sapiens GN=RCC2 PE=1 SV=2 - [RCC2_HUMAN]	19.35	1	7	7	44	13.98	5	8	8.24	3	4	10.34	4	8	11.49	4	12	6.51	2	3	8.24	3	9
Q15293	Reticulocalbin-1 OS=Homo sapiens GN=RCN1 PE=1 SV=1 - [RCN1_HUMAN]	19.34	1	6	6	16	7.25	2	2	4.83	1	1	7.25	2	2	19.34	5	5	8.46	2	3	8.76	2	3
Q01105	Protein SET OS=Homo sapiens GN=SET PE=1 SV=3 - [SET_HUMAN]	19.31	2	7	7	20	3.45	1	1	3.45	1	1	11.38	3	4	19.31	6	10	3.45	1	1	6.55	2	3
Q9NPD8	Ubiquitin-conjugating enzyme E2 T OS=Homo sapiens GN=UBE2T PE=1 SV=1 - [UBE2T_HUMAN]	19.29	1	4	4	9							7.61	1	1	15.23	3	3	16.75	3	4	7.61	1	1
O15460	Prolyl 4-hydroxylase subunit alpha-2 OS=Homo sapiens GN=P4HA2 PE=1 SV=1 - [P4HA2_HUMAN]	19.25	1	8	8	41	10.65	5	8	9.91	4	6	19.25	8	11	9.91	4	7	9.91	4	6	7.85	3	3
Q8WWY3	U4/U6 small nuclear ribonucleoprotein Prp31 OS=Homo sapiens GN=PRPF31 PE=1 SV=2 - [PRP31_HUMAN]	19.24	1	6	6	41	17.03	5	10	9.62	3	4	14.83	4	8	14.63	4	6	14.83	4	7	9.82	3	6
P47755	F-actin-capping protein subunit alpha-2 OS=Homo sapiens GN=CAPZA2 PE=1 SV=3 - [CAZA2_HUMAN]	19.23	1	1	6	42	19.23	6	8	10.14	3	5	12.94	4	7	19.23	6	11	12.94	4	6	16.43	5	5
P36405	ADP-ribosylation factor-like protein 3 OS=Homo sapiens GN=ARL3 PE=1 SV=2 - [ARL3_HUMAN]	19.23	1	3	3	18	19.23	2	4	19.23	2	2	10.44	1	3	19.23	3	4	10.44	1	2	19.23	2	3
Q6P1N9	Putative deoxyribonuclease TATDN1 OS=Homo sapiens GN=TATDN1 PE=1 SV=2 - [TATD1_HUMAN]	19.19	1	5	5	27	8.42	2	2	11.78	3	3	13.8	3	3	13.8	4	11	8.42	2	3	8.42	2	5
Q9UNZ5	Leydig cell tumor 10 kDa protein homolog OS=Homo sapiens GN=C19orf53 PE=1 SV=1 - [L10K_HUMAN]	19.19	1	2	2	2	9.09	1	1	10.1	1	1
P31930	Cytochrome b-c1 complex subunit 1, mitochondrial OS=Homo sapiens GN=UQCRC1 PE=1 SV=3 - [QCR1_HUMAN]	19.17	1	7	7	68	19.17	7	12	18.13	6	10	19.17	6	10	19.17	7	13	19.17	6	12	19.17	7	11
P01614	Ig kappa chain V-II region Cum OS=Homo sapiens PE=1 SV=1 - [KV201_HUMAN]	19.13	1	1	1	1																19.13	1	1
P23381	Tryptophan--tRNA ligase, cytoplasmic OS=Homo sapiens GN=WARS PE=1 SV=2 - [SYWC_HUMAN]	19.11	1	6	6	36	7.01	2	3	7.01	2	2	16.99	5	8	7.64	3	6	14.65	5	9	11.89	3	8
P99999	Cytochrome c OS=Homo sapiens GN=CYCS PE=1 SV=2 - [CYC_HUMAN]	19.05	1	2	2	3	19.05	2	2				12.38	1	1
Q14203	Dynactin subunit 1 OS=Homo sapiens GN=DCTN1 PE=1 SV=3 - [DCTN1_HUMAN]	19.01	1	18	18	106	10.72	9	13	9.94	9	19	11.5	10	17	16.12	13	19	10.72	9	18	9.7	9	20
Q96K17	Transcription factor BTF3 homolog 4 OS=Homo sapiens GN=BTF3L4 PE=1 SV=1 - [BT3L4_HUMAN]	18.99	1	3	6	27	8.86	4	5	8.86	3	4	8.86	3	4	13.92	4	7	13.92	3	3	8.86	3	4
Q9Y6D9	Mitotic spindle assembly checkpoint protein MAD1 OS=Homo sapiens GN=MAD1L1 PE=1 SV=2 - [MD1L1_HUMAN]	18.94	1	9	9	45	9.05	4	6	13.79	6	8	11.7	5	7	14.21	6	9	9.05	4	5	10.86	5	10
Q9UIJ7	GTP:AMP phosphotransferase AK3, mitochondrial OS=Homo sapiens GN=AK3 PE=1 SV=4 - [KAD3_HUMAN]	18.94	1	3	3	8	7.05	1	1				4.41	1	1	14.54	2	3	14.54	2	3
Q16626	Male-enhanced antigen 1 OS=Homo sapiens GN=MEA1 PE=1 SV=2 - [MEA1_HUMAN]	18.92	1	3	3	21	18.92	2	3	18.92	2	4	18.92	3	3	18.92	3	6	18.92	2	3	18.92	2	2
Q15435	Protein phosphatase 1 regulatory subunit 7 OS=Homo sapiens GN=PPP1R7 PE=1 SV=1 - [PP1R7_HUMAN]	18.89	1	5	5	33	10.56	3	7	10.56	3	5	18.89	5	7	10.56	3	4	10.56	3	5	10.56	3	5
P21741	Midkine OS=Homo sapiens GN=MDK PE=1 SV=1 - [MK_HUMAN]	18.88	1	3	3	17	13.29	2	2	18.88	2	2	18.88	3	5	18.88	2	2	12.59	2	3	18.88	3	3
Q13148	TAR DNA-binding protein 43 OS=Homo sapiens GN=TARDBP PE=1 SV=1 - [TADBP_HUMAN]	18.84	1	9	10	66	13.04	7	11	10.87	5	11	17.63	8	14	14.25	7	10	15.7	7	11	10.87	5	9
Q9NY93	Probable ATP-dependent RNA helicase DDX56 OS=Homo sapiens GN=DDX56 PE=1 SV=1 - [DDX56_HUMAN]	18.83	1	7	7	44	14.44	5	6	11.33	4	8	14.08	5	7	16.64	6	11	11.33	4	6	14.08	5	6
Q9HCD5	Nuclear receptor coactivator 5 OS=Homo sapiens GN=NCOA5 PE=1 SV=2 - [NCOA5_HUMAN]	18.83	1	4	4	17	4.84	2	2	7.25	1	2	18.83	4	4	2.59	1	3	16.23	3	5	6.74	1	1
P48739	Phosphatidylinositol transfer protein beta isoform OS=Homo sapiens GN=PITPNB PE=1 SV=2 - [PIPNB_HUMAN]	18.82	2	5	5	28	11.07	3	3	11.07	3	5	11.07	4	8	11.07	3	3	15.87	4	5	8.12	2	4
P09497	Clathrin light chain B OS=Homo sapiens GN=CLTB PE=1 SV=1 - [CLCB_HUMAN]	18.78	1	4	4	41	10.92	3	6	6.55	2	3	14.41	3	9	18.78	4	12	14.41	3	6	10.92	3	5
P17812	CTP synthase 1 OS=Homo sapiens GN=CTPS1 PE=1 SV=2 - [PYRG1_HUMAN]	18.78	1	14	14	87	12.01	9	18	12.18	10	14	12.35	10	14	14.89	10	11	17.26	11	17	14.21	11	13
Q01813	ATP-dependent 6-phosphofructokinase, platelet type OS=Homo sapiens GN=PFKP PE=1 SV=2 - [PFKAP_HUMAN]	18.75	1	14	14	54	10.08	7	8	8.04	4	6	13.27	8	11	11.99	9	12	12.88	8	10	9.31	4	7
Q92688	Acidic leucine-rich nuclear phosphoprotein 32 family member B OS=Homo sapiens GN=ANP32B PE=1 SV=1 - [AN32B_HUMAN]	18.73	1	5	9	54	15.94	6	9	18.33	5	5	13.94	4	7	18.33	5	9	18.73	9	15	18.33	6	9
Q15007	Pre-mRNA-splicing regulator WTAP OS=Homo sapiens GN=WTAP PE=1 SV=2 - [FL2D_HUMAN]	18.69	1	5	5	21	6.31	2	3	7.83	2	2	8.59	2	3	5.05	1	3	7.83	2	6	12.37	3	4
Q9UGV2	Protein NDRG3 OS=Homo sapiens GN=NDRG3 PE=1 SV=2 - [NDRG3_HUMAN]	18.67	1	4	4	21	14.13	2	5	8	1	2	14.13	2	5	8	1	1	8	1	3	12.53	3	5
P35250	Replication factor C subunit 2 OS=Homo sapiens GN=RFC2 PE=1 SV=3 - [RFC2_HUMAN]	18.64	1	3	3	19	12.43	2	3	18.64	3	3	12.43	2	3	12.43	2	3	18.64	3	5	12.43	2	2
O95347	Structural maintenance of chromosomes protein 2 OS=Homo sapiens GN=SMC2 PE=1 SV=2 - [SMC2_HUMAN]	18.63	1	14	14	63	4.76	3	10	4.43	4	7	8.19	6	9	16.04	11	19	8.69	7	12	4.18	3	6
Q9NUU7	ATP-dependent RNA helicase DDX19A OS=Homo sapiens GN=DDX19A PE=1 SV=1 - [DD19A_HUMAN]	18.62	2	6	6	34	10.46	3	4	10.46	3	5	12.55	4	7	16.53	5	11	12.55	4	4	10.46	3	3
P61081	NEDD8-conjugating enzyme Ubc12 OS=Homo sapiens GN=UBE2M PE=1 SV=1 - [UBC12_HUMAN]	18.58	1	5	5	35	18.03	4	9	16.39	3	4	16.39	3	5	18.58	5	10	16.39	3	3	16.39	3	4
P60896	26S proteasome complex subunit DSS1 OS=Homo sapiens GN=SHFM1 PE=1 SV=1 - [DSS1_HUMAN]	18.57	1	1	1	8	18.57	1	2				18.57	1	1	18.57	1	1	18.57	1	1	18.57	1	3
O75817	Ribonuclease P protein subunit p20 OS=Homo sapiens GN=POP7 PE=1 SV=2 - [POP7_HUMAN]	18.57	1	2	2	4				7.14	1	1				11.43	1	1				7.14	1	2
Q13253	Noggin OS=Homo sapiens GN=NOG PE=1 SV=1 - [NOGG_HUMAN]	18.53	1	5	5	31	12.5	3	4	12.5	3	5	12.5	3	6	12.5	4	8	12.5	3	3	18.53	4	5
P25325	3-mercaptopyruvate sulfurtransferase OS=Homo sapiens GN=MPST PE=1 SV=3 - [THTM_HUMAN]	18.52	1	5	5	48	18.52	4	8	15.82	3	4	15.82	3	6	18.52	5	9	18.52	5	12	15.82	4	9
P51571	Translocon-associated protein subunit delta OS=Homo sapiens GN=SSR4 PE=1 SV=1 - [SSRD_HUMAN]	18.5	1	3	3	18	17.34	2	4	18.5	2	3	6.36	1	1	18.5	2	5	18.5	3	4	6.36	1	1
P19404	NADH dehydrogenase [ubiquinone] flavoprotein 2, mitochondrial OS=Homo sapiens GN=NDUFV2 PE=1 SV=2 - [NDUV2_HUMAN]	18.47	1	4	4	24	18.47	3	9	16.87	2	2	16.87	2	3	16.87	3	3	18.47	3	4	16.87	2	3
P59998	Actin-related protein 2/3 complex subunit 4 OS=Homo sapiens GN=ARPC4 PE=1 SV=3 - [ARPC4_HUMAN]	18.45	1	4	4	20	18.45	4	7	17.26	2	2	17.26	3	3	17.26	3	3	17.26	3	3	17.26	2	2
Q9NY12	H/ACA ribonucleoprotein complex subunit 1 OS=Homo sapiens GN=GAR1 PE=1 SV=1 - [GAR1_HUMAN]	18.43	1	4	4	37	7.37	2	5	10.14	2	5	15.67	3	8	15.67	3	6	15.67	3	6	15.67	3	7
P29218	Inositol monophosphatase 1 OS=Homo sapiens GN=IMPA1 PE=1 SV=1 - [IMPA1_HUMAN]	18.41	1	3	3	20	5.78	1	2	5.78	1	2	12.64	2	5	18.41	3	4	12.64	2	5	5.78	1	2
Q9Y5S9	RNA-binding protein 8A OS=Homo sapiens GN=RBM8A PE=1 SV=1 - [RBM8A_HUMAN]	18.39	1	4	4	25	17.24	2	3	17.24	2	3	17.24	2	3	17.24	2	2	17.24	2	10	18.39	3	4
P07108	Acyl-CoA-binding protein OS=Homo sapiens GN=DBI PE=1 SV=2 - [ACBP_HUMAN]	18.39	1	1	1	1				18.39	1	1
Q96IK1	Biorientation of chromosomes in cell division protein 1 OS=Homo sapiens GN=BOD1 PE=1 SV=2 - [BOD1_HUMAN]	18.38	1	3	3	6	12.43	1	1				18.38	3	3	12.43	1	1	12.43	1	1
Q9NW82	WD repeat-containing protein 70 OS=Homo sapiens GN=WDR70 PE=1 SV=1 - [WDR70_HUMAN]	18.35	1	8	8	35	11.62	4	6	11.62	4	4	7.8	3	4	13.15	5	6	14.37	6	7	15.75	6	8
Q12931	Heat shock protein 75 kDa, mitochondrial OS=Homo sapiens GN=TRAP1 PE=1 SV=3 - [TRAP1_HUMAN]	18.32	1	9	10	53	12.36	5	9	6.68	3	6	8.24	4	7	12.64	8	13	12.36	5	10	10.51	6	8
Q86X51	Uncharacterized protein CXorf67 OS=Homo sapiens GN=CXorf67 PE=2 SV=1 - [CX067_HUMAN]	18.29	1	12	12	85	13.52	8	14	11.93	8	14	14.12	10	14	13.52	8	13	15.51	9	16	14.12	9	14
P35052	Glypican-1 OS=Homo sapiens GN=GPC1 PE=1 SV=2 - [GPC1_HUMAN]	18.28	1	10	10	35	9.86	4	5	8.78	3	4	14.52	6	6	14.87	6	11	8.78	3	5	10.04	3	4
P48507	Glutamate--cysteine ligase regulatory subunit OS=Homo sapiens GN=GCLM PE=1 SV=1 - [GSH0_HUMAN]	18.25	1	4	4	25	12.77	3	7	9.85	2	5	9.85	2	3	15.33	3	5	9.85	2	3	9.85	2	2
P20073	Annexin A7 OS=Homo sapiens GN=ANXA7 PE=1 SV=3 - [ANXA7_HUMAN]	18.24	1	7	7	25	4.92	2	3	6.15	2	3	12.91	4	4	17.21	6	8	6.15	2	3	7.99	3	4
O95983	Methyl-CpG-binding domain protein 3 OS=Homo sapiens GN=MBD3 PE=1 SV=1 - [MBD3_HUMAN]	18.21	1	3	3	20	12.71	2	3	18.21	3	3	18.21	3	3	12.71	2	3	12.71	2	4	12.71	2	4
Q6RFH5	WD repeat-containing protein 74 OS=Homo sapiens GN=WDR74 PE=1 SV=1 - [WDR74_HUMAN]	18.18	1	5	5	25	3.64	1	1	11.95	3	4	3.64	1	1	15.32	4	9	10.13	3	8	8.31	2	2
Q9NQ39	Putative 40S ribosomal protein S10-like OS=Homo sapiens GN=RPS10P5 PE=5 SV=1 - [RS10L_HUMAN]	18.18	1	1	3	29	4.55	1	2	9.09	2	18	9.09	1	1	9.09	2	2	4.55	1	1	9.09	2	5
Q5EE01	Centromere protein W OS=Homo sapiens GN=CENPW PE=1 SV=1 - [CENPW_HUMAN]	18.18	1	1	1	2							18.18	1	1							18.18	1	1
O15479	Melanoma-associated antigen B2 OS=Homo sapiens GN=MAGEB2 PE=1 SV=3 - [MAGB2_HUMAN]	18.18	1	3	3	6							7.84	1	1	13.17	2	2	5.02	1	1	12.85	2	2
Q0VGL1	Ragulator complex protein LAMTOR4 OS=Homo sapiens GN=LAMTOR4 PE=1 SV=1 - [LTOR4_HUMAN]	18.18	1	1	1	1																18.18	1	1
P49023	Paxillin OS=Homo sapiens GN=PXN PE=1 SV=3 - [PAXI_HUMAN]	18.1	1	7	7	48	12.18	5	9	11.84	5	8	12.18	5	8	12.18	5	9	11.68	5	6	5.41	2	8
O00487	26S proteasome non-ATPase regulatory subunit 14 OS=Homo sapiens GN=PSMD14 PE=1 SV=1 - [PSDE_HUMAN]	18.06	1	2	2	5	10.97	1	1				10.97	1	1	18.06	2	2	10.97	1	1
Q15424	Scaffold attachment factor B1 OS=Homo sapiens GN=SAFB PE=1 SV=4 - [SAFB1_HUMAN]	18.03	1	10	16	114	13.77	12	19	12.24	10	15	13.77	12	25	16.5	15	18	13.55	12	18	13.77	12	19
O95881	Thioredoxin domain-containing protein 12 OS=Homo sapiens GN=TXNDC12 PE=1 SV=1 - [TXD12_HUMAN]	18.02	1	2	2	12	12.79	1	1	12.79	1	2	12.79	1	2	18.02	2	2	12.79	1	2	12.79	1	3
Q9BXV9	Uncharacterized protein C14orf142 OS=Homo sapiens GN=C14orf142 PE=1 SV=2 - [CN142_HUMAN]	18	1	1	1	6	18	1	1	18	1	1	18	1	1	18	1	1	18	1	1	18	1	1
Q8N0T1	Uncharacterized protein C8orf59 OS=Homo sapiens GN=C8orf59 PE=1 SV=4 - [CH059_HUMAN]	18	1	1	1	1							18	1	1
Q96AT9	Ribulose-phosphate 3-epimerase OS=Homo sapiens GN=RPE PE=1 SV=1 - [RPE_HUMAN]	17.98	2	3	3	29	13.6	2	5	17.98	3	3	13.6	2	5	17.98	3	7	13.6	2	5	17.98	3	4
Q9NZL9	Methionine adenosyltransferase 2 subunit beta OS=Homo sapiens GN=MAT2B PE=1 SV=1 - [MAT2B_HUMAN]	17.96	1	5	5	29	14.37	3	4	14.37	3	5	14.37	3	4	17.96	5	7	14.37	3	4	14.37	3	5
P49327	Fatty acid synthase OS=Homo sapiens GN=FASN PE=1 SV=3 - [FAS_HUMAN]	17.96	1	33	33	253	11.83	21	41	10.87	21	35	14.1	25	59	13.46	22	45	11.83	19	41	8.72	15	32
O15067	Phosphoribosylformylglycinamidine synthase OS=Homo sapiens GN=PFAS PE=1 SV=4 - [PUR4_HUMAN]	17.94	1	13	13	35	3.81	3	3	6.88	6	6	9.27	6	6	8.3	6	6	8.82	7	7	7.1	7	7
Q9H0U4	Ras-related protein Rab-1B OS=Homo sapiens GN=RAB1B PE=1 SV=1 - [RAB1B_HUMAN]	17.91	2	1	2	10	9.45	1	1	9.45	1	2	17.91	2	3	9.45	1	1	9.45	1	1	9.45	1	2
P42696	RNA-binding protein 34 OS=Homo sapiens GN=RBM34 PE=1 SV=2 - [RBM34_HUMAN]	17.91	1	4	4	6	3.02	1	1				3.02	1	1	4.88	1	1	6.98	1	1	6.05	2	2
P82930	28S ribosomal protein S34, mitochondrial OS=Homo sapiens GN=MRPS34 PE=1 SV=2 - [RT34_HUMAN]	17.89	1	4	4	34	13.76	2	3	17.89	2	7	17.89	3	11	17.89	2	5	17.89	2	5	17.89	2	3
Q9Y6M9	NADH dehydrogenase [ubiquinone] 1 beta subcomplex subunit 9 OS=Homo sapiens GN=NDUFB9 PE=1 SV=3 - [NDUB9_HUMAN]	17.88	1	3	3	14	8.94	2	3	8.94	2	2	5.03	1	2	8.94	1	1	17.88	3	3	8.94	2	3
P18887	DNA repair protein XRCC1 OS=Homo sapiens GN=XRCC1 PE=1 SV=2 - [XRCC1_HUMAN]	17.85	1	6	6	29	8.85	2	3	8.85	2	6	8.85	2	6	10.27	3	3	11.85	3	5	13.43	4	6
Q9NT62	Ubiquitin-like-conjugating enzyme ATG3 OS=Homo sapiens GN=ATG3 PE=1 SV=1 - [ATG3_HUMAN]	17.83	1	5	5	32	12.74	3	6	12.74	3	4	17.83	4	5	12.74	3	5	12.74	4	8	12.74	3	4
Q96K21	Abscission/NoCut checkpoint regulator OS=Homo sapiens GN=ZFYVE19 PE=1 SV=3 - [ANCHR_HUMAN]	17.83	1	5	5	25	8.49	3	3	4.88	2	2	15.5	4	7	15.5	4	6	5.31	2	4	4.88	2	3
Q13501	Sequestosome-1 OS=Homo sapiens GN=SQSTM1 PE=1 SV=1 - [SQSTM_HUMAN]	17.73	1	4	4	14	4.55	1	2	10	2	3	10	2	2	17.73	4	4	4.55	1	2	4.55	1	1
Q8NB37	Parkinson disease 7 domain-containing protein 1 OS=Homo sapiens GN=PDDC1 PE=1 SV=1 - [PDDC1_HUMAN]	17.73	1	2	2	8	10.91	1	1	10.91	1	1	10.91	1	1	17.73	2	2	10.91	1	2	10.91	1	1
P61024	Cyclin-dependent kinases regulatory subunit 1 OS=Homo sapiens GN=CKS1B PE=1 SV=1 - [CKS1_HUMAN]	17.72	1	2	2	30	17.72	2	5	17.72	2	4	17.72	2	5	17.72	2	4	17.72	2	5	17.72	2	7
P63279	SUMO-conjugating enzyme UBC9 OS=Homo sapiens GN=UBE2I PE=1 SV=1 - [UBC9_HUMAN]	17.72	1	4	4	26	17.72	4	6	16.46	3	3	17.72	4	5	17.72	4	6	17.72	3	4	8.23	2	2
P26639	Threonine--tRNA ligase, cytoplasmic OS=Homo sapiens GN=TARS PE=1 SV=3 - [SYTC_HUMAN]	17.7	1	11	11	69	10.93	6	15	7.61	5	10	11.2	7	12	13.42	8	14	10.51	6	10	7.88	5	8
P12081	Histidine--tRNA ligase, cytoplasmic OS=Homo sapiens GN=HARS PE=1 SV=2 - [SYHC_HUMAN]	17.68	1	7	7	32	17.68	5	7	8.06	3	4	14.93	5	6	8.64	3	5	8.64	4	5	11.39	4	5
P19367	Hexokinase-1 OS=Homo sapiens GN=HK1 PE=1 SV=3 - [HXK1_HUMAN]	17.67	2	11	11	46	7.96	4	6	8.83	5	8	8.83	5	7	14.61	8	9	14.07	9	11	7.52	4	5
Q9BRU9	rRNA-processing protein UTP23 homolog OS=Homo sapiens GN=UTP23 PE=1 SV=2 - [UTP23_HUMAN]	17.67	1	3	3	23	11.65	2	3	17.67	3	5	17.67	3	5	17.67	3	3	17.67	3	3	11.65	2	4
Q99961	Endophilin-A2 OS=Homo sapiens GN=SH3GL1 PE=1 SV=1 - [SH3G1_HUMAN]	17.66	2	6	6	36	10.33	3	7	6.25	2	4	10.33	3	7	14.95	5	7	10.05	3	4	12.77	4	7
P30533	Alpha-2-macroglobulin receptor-associated protein OS=Homo sapiens GN=LRPAP1 PE=1 SV=1 - [AMRP_HUMAN]	17.65	1	9	9	44	5.32	3	6	12.61	5	10	7.56	3	3	12.04	5	8	8.12	4	9	14.85	5	8
O15372	Eukaryotic translation initiation factor 3 subunit H OS=Homo sapiens GN=EIF3H PE=1 SV=1 - [EIF3H_HUMAN]	17.61	1	3	3	12	13.35	2	2	7.67	1	3	5.68	1	1	13.35	2	2	7.67	1	1	11.93	2	3
P49903	Selenide, water dikinase 1 OS=Homo sapiens GN=SEPHS1 PE=1 SV=2 - [SPS1_HUMAN]	17.6	1	6	6	38	6.89	2	7	10.71	3	6	13.78	4	9	11.48	4	7	6.89	2	4	6.89	2	5
P28072	Proteasome subunit beta type-6 OS=Homo sapiens GN=PSMB6 PE=1 SV=4 - [PSB6_HUMAN]	17.57	1	5	5	56	17.57	4	11	17.57	4	11	17.57	5	9	17.57	4	9	17.57	4	9	17.57	5	7
Q9P270	SLAIN motif-containing protein 2 OS=Homo sapiens GN=SLAIN2 PE=1 SV=2 - [SLAI2_HUMAN]	17.56	2	9	9	44	13.43	5	10	10.5	5	6	15.66	6	8	14.29	5	9	13.43	5	8	7.92	3	3
Q99543	DnaJ homolog subfamily C member 2 OS=Homo sapiens GN=DNAJC2 PE=1 SV=4 - [DNJC2_HUMAN]	17.55	1	9	9	46	11.43	5	11	9.5	4	4	11.43	5	8	17.23	8	9	7.57	5	5	11.43	5	9
P14550	Alcohol dehydrogenase [NADP(+)] OS=Homo sapiens GN=AKR1A1 PE=1 SV=3 - [AK1A1_HUMAN]	17.54	1	4	4	13	6.15	2	3	4	1	1	8.62	2	3	4	1	1	10.77	2	2	8.62	2	3
Q53H96	Pyrroline-5-carboxylate reductase 3 OS=Homo sapiens GN=PYCRL PE=1 SV=3 - [P5CR3_HUMAN]	17.52	1	4	4	24	8.03	2	5	8.76	2	2	17.52	4	7	12.77	3	4	12.77	3	4	8.76	2	2
P53396	ATP-citrate synthase OS=Homo sapiens GN=ACLY PE=1 SV=3 - [ACLY_HUMAN]	17.44	1	15	15	68	10.9	9	13	7.9	8	12	10.26	8	13	11.17	9	13	7.45	6	9	6.45	6	8
Q8TCD5	5'(3')-deoxyribonucleotidase, cytosolic type OS=Homo sapiens GN=NT5C PE=1 SV=2 - [NT5C_HUMAN]	17.41	1	3	3	3	8.96	1	1							6.47	1	1	10.95	1	1
P62995	Transformer-2 protein homolog beta OS=Homo sapiens GN=TRA2B PE=1 SV=1 - [TRA2B_HUMAN]	17.36	1	4	5	23	11.81	4	5	3.47	1	2	6.94	2	4	12.5	3	4	8.33	3	3	11.81	4	5
Q15773	Myeloid leukemia factor 2 OS=Homo sapiens GN=MLF2 PE=1 SV=1 - [MLF2_HUMAN]	17.34	1	3	3	10	10.89	1	1	13.31	2	4	10.89	1	1	14.92	2	2	10.89	1	2
Q6QNY0	Biogenesis of lysosome-related organelles complex 1 subunit 3 OS=Homo sapiens GN=BLOC1S3 PE=1 SV=1 - [BL1S3_HUMAN]	17.33	1	2	2	12	9.41	1	2	9.41	1	1	17.33	2	4	9.41	1	1	9.41	1	3	9.41	1	1
Q9NRR5	Ubiquilin-4 OS=Homo sapiens GN=UBQLN4 PE=1 SV=2 - [UBQL4_HUMAN]	17.3	1	4	9	48	5.82	4	6	5.82	5	9	5.82	4	8	17.3	9	11	8.65	5	7	5.16	4	7
Q99496	E3 ubiquitin-protein ligase RING2 OS=Homo sapiens GN=RNF2 PE=1 SV=1 - [RING2_HUMAN]	17.26	1	2	4	23	8.93	2	2	9.82	2	2	12.2	3	5	17.26	4	8	13.99	3	5	4.76	1	1
Q9Y371	Endophilin-B1 OS=Homo sapiens GN=SH3GLB1 PE=1 SV=1 - [SHLB1_HUMAN]	17.26	1	6	6	34	10.68	3	5	16.44	4	5	16.44	4	6	13.7	4	8	10.68	3	4	17.26	5	6
P53803	DNA-directed RNA polymerases I, II, and III subunit RPABC4 OS=Homo sapiens GN=POLR2K PE=2 SV=1 - [RPAB4_HUMAN]	17.24	1	2	2	13	17.24	2	3	13.79	1	1	17.24	2	4	13.79	1	2	13.79	1	1	13.79	1	2
Q9UI09	NADH dehydrogenase [ubiquinone] 1 alpha subcomplex subunit 12 OS=Homo sapiens GN=NDUFA12 PE=1 SV=1 - [NDUAC_HUMAN]	17.24	1	2	2	16	6.21	1	1	17.24	2	4	17.24	2	2	17.24	2	4	17.24	2	3	17.24	2	2
P46459	Vesicle-fusing ATPase OS=Homo sapiens GN=NSF PE=1 SV=3 - [NSF_HUMAN]	17.2	1	9	9	71	10.22	6	13	10.22	6	11	15.59	8	12	13.98	7	10	11.83	7	13	11.83	7	12
Q9P000	COMM domain-containing protein 9 OS=Homo sapiens GN=COMMD9 PE=1 SV=2 - [COMD9_HUMAN]	17.17	1	3	3	10	5.56	1	1	11.11	2	2	11.62	2	2	5.56	1	2	11.62	2	2	5.56	1	1
Q9Y6G1	Transmembrane protein 14A OS=Homo sapiens GN=TMEM14A PE=1 SV=1 - [TM14A_HUMAN]	17.17	1	1	1	1																17.17	1	1
O43708	Maleylacetoacetate isomerase OS=Homo sapiens GN=GSTZ1 PE=1 SV=3 - [MAAI_HUMAN]	17.13	1	2	2	7	11.11	1	1	11.11	1	1	11.11	1	1	17.13	2	2	11.11	1	1	11.11	1	1
Q6DKI1	60S ribosomal protein L7-like 1 OS=Homo sapiens GN=RPL7L1 PE=1 SV=1 - [RL7L_HUMAN]	17.07	3	6	6	19	4.47	1	1	7.32	3	3	4.88	2	2	14.63	5	6	10.16	3	3	9.76	3	4
Q96FF9	Sororin OS=Homo sapiens GN=CDCA5 PE=1 SV=1 - [CDCA5_HUMAN]	17.06	1	3	3	21	17.06	2	2	17.06	2	3	7.54	2	2	7.54	2	3	17.06	3	5	17.06	2	6
Q15459	Splicing factor 3A subunit 1 OS=Homo sapiens GN=SF3A1 PE=1 SV=1 - [SF3A1_HUMAN]	17.02	1	10	10	41	8.95	4	4	12.48	5	8	7.94	4	6	11.98	8	10	12.86	6	6	10.84	5	7
Q96C90	Protein phosphatase 1 regulatory subunit 14B OS=Homo sapiens GN=PPP1R14B PE=1 SV=3 - [PP14B_HUMAN]	17.01	1	2	2	28	17.01	2	5	17.01	2	2	17.01	2	4	17.01	2	5	17.01	2	9	17.01	2	3
Q9BPX5	Actin-related protein 2/3 complex subunit 5-like protein OS=Homo sapiens GN=ARPC5L PE=1 SV=1 - [ARP5L_HUMAN]	16.99	1	2	2	12	7.84	1	1	7.84	1	1	7.84	1	2	16.99	2	4	7.84	1	2	7.84	1	2
Q9NX14	NADH dehydrogenase [ubiquinone] 1 beta subcomplex subunit 11, mitochondrial OS=Homo sapiens GN=NDUFB11 PE=1 SV=1 - [NDUBB_HUMAN]	16.99	1	1	1	1										16.99	1	1
O75569	Interferon-inducible double-stranded RNA-dependent protein kinase activator A OS=Homo sapiens GN=PRKRA PE=1 SV=1 - [PRKRA_HUMAN]	16.93	1	4	4	6										6.07	1	1	3.83	1	1	10.86	3	4
Q9BTY7	Protein HGH1 homolog OS=Homo sapiens GN=HGH1 PE=1 SV=1 - [HGH1_HUMAN]	16.92	1	3	3	7	9.74	2	3	3.33	1	1	7.18	1	3
P41250	Glycine--tRNA ligase OS=Homo sapiens GN=GARS PE=1 SV=3 - [SYG_HUMAN]	16.91	1	7	7	26	4.6	2	2	7.17	3	3	9.88	4	7	9.47	4	7	4.47	2	3	6.77	3	4
Q8N6H7	ADP-ribosylation factor GTPase-activating protein 2 OS=Homo sapiens GN=ARFGAP2 PE=1 SV=1 - [ARFG2_HUMAN]	16.89	1	6	6	23	6.14	2	2	9.79	3	3	6.91	3	5	13.24	5	8	6.91	3	3	3.65	2	2
P11310	Medium-chain specific acyl-CoA dehydrogenase, mitochondrial OS=Homo sapiens GN=ACADM PE=1 SV=1 - [ACADM_HUMAN]	16.86	1	3	3	25	10.45	2	3	3.09	1	1	16.86	3	7	16.86	3	4	10.45	2	8	3.09	1	2
Q12792	Twinfilin-1 OS=Homo sapiens GN=TWF1 PE=1 SV=3 - [TWF1_HUMAN]	16.86	1	3	4	25	6.29	2	7	11.43	3	5	11.71	3	5	6.29	2	2	6.29	2	3	6.29	2	3
Q9NV31	U3 small nucleolar ribonucleoprotein protein IMP3 OS=Homo sapiens GN=IMP3 PE=1 SV=1 - [IMP3_HUMAN]	16.85	1	2	2	15	16.85	2	3	8.7	1	1	16.85	2	2	16.85	2	2	16.85	2	2	16.85	2	5
P30483	HLA class I histocompatibility antigen, B-45 alpha chain OS=Homo sapiens GN=HLA-B PE=1 SV=1 - [1B45_HUMAN]	16.85	19	0	5	25	8.56	2	3	13.54	3	4	11.6	3	3	16.85	4	7	11.6	3	4	8.56	2	4
Q9BSH4	Translational activator of cytochrome c oxidase 1 OS=Homo sapiens GN=TACO1 PE=1 SV=1 - [TACO1_HUMAN]	16.84	1	4	4	9				13.13	2	2	3.7	1	1	8.08	2	2	8.08	1	1	8.08	2	3
Q9UHR4	Brain-specific angiogenesis inhibitor 1-associated protein 2-like protein 1 OS=Homo sapiens GN=BAIAP2L1 PE=1 SV=2 - [BI2L1_HUMAN]	16.83	1	6	6	25	4.11	1	1	11.35	2	3	11.35	2	3	15.66	4	8	14.29	5	6	4.11	1	4
Q16629	Serine/arginine-rich splicing factor 7 OS=Homo sapiens GN=SRSF7 PE=1 SV=1 - [SRSF7_HUMAN]	16.81	1	2	3	23	7.14	1	4	7.14	1	6	16.81	3	4	13.03	2	3	7.14	1	3	7.14	1	3
P52701	DNA mismatch repair protein Msh6 OS=Homo sapiens GN=MSH6 PE=1 SV=2 - [MSH6_HUMAN]	16.76	1	17	17	112	11.84	10	18	8.38	7	17	10	9	21	13.53	13	21	12.35	10	20	9.41	7	15
O94903	Proline synthase co-transcribed bacterial homolog protein OS=Homo sapiens GN=PROSC PE=1 SV=1 - [PROSC_HUMAN]	16.73	1	4	4	17	10.55	2	3	12.36	2	2	10.55	2	2	14.91	3	4	10.55	2	2	12.36	3	4
Q8IWS0	PHD finger protein 6 OS=Homo sapiens GN=PHF6 PE=1 SV=1 - [PHF6_HUMAN]	16.71	1	4	4	16	4.93	1	1	4.93	1	2	4.93	1	4	16.71	4	7	4.93	1	1	4.93	1	1
P35580	Myosin-10 OS=Homo sapiens GN=MYH10 PE=1 SV=3 - [MYH10_HUMAN]	16.7	9	16	30	182	11.18	20	30	11.13	21	34	10.93	18	33	12.1	21	37	10.37	18	25	8.91	17	23
P40261	Nicotinamide N-methyltransferase OS=Homo sapiens GN=NNMT PE=1 SV=1 - [NNMT_HUMAN]	16.67	1	2	2	2	2.27	1	1				14.39	1	1
P15586	N-acetylglucosamine-6-sulfatase OS=Homo sapiens GN=GNS PE=1 SV=3 - [GNS_HUMAN]	16.67	1	5	5	19	7.61	3	5	9.24	2	3	7.61	3	4	4.53	2	2	7.61	3	4	2.36	1	1
Q9Y6W5	Wiskott-Aldrich syndrome protein family member 2 OS=Homo sapiens GN=WASF2 PE=1 SV=3 - [WASF2_HUMAN]	16.67	1	6	6	17	2.81	1	1	6.02	2	2	3.82	1	2	9.84	3	7	5.82	2	2	6.83	3	3
Q9NVI7	ATPase family AAA domain-containing protein 3A OS=Homo sapiens GN=ATAD3A PE=1 SV=2 - [ATD3A_HUMAN]	16.56	2	5	8	21	4.26	2	2	6.62	3	3	4.57	2	2	13.88	6	8	5.84	4	4	2.84	2	2
Q16630	Cleavage and polyadenylation specificity factor subunit 6 OS=Homo sapiens GN=CPSF6 PE=1 SV=2 - [CPSF6_HUMAN]	16.52	1	7	7	68	9.98	5	11	13.43	4	6	13.97	5	14	16.52	6	12	9.98	4	15	13.97	5	10
Q6PKG0	La-related protein 1 OS=Homo sapiens GN=LARP1 PE=1 SV=2 - [LARP1_HUMAN]	16.51	1	11	11	48	7.85	5	7	7.03	4	5	8.67	5	6	12.23	8	13	11.95	7	9	9.22	6	8
Q9BW19	Kinesin-like protein KIFC1 OS=Homo sapiens GN=KIFC1 PE=1 SV=2 - [KIFC1_HUMAN]	16.49	1	7	7	45	10.7	4	6	14.12	5	6	10.7	4	8	13.08	6	8	14.12	6	10	14.12	5	7
O60216	Double-strand-break repair protein rad21 homolog OS=Homo sapiens GN=RAD21 PE=1 SV=2 - [RAD21_HUMAN]	16.48	1	7	7	29	11.41	4	5	9.35	3	6	14.42	5	5	11.09	4	5	11.41	4	6	6.81	2	2
P02786	Transferrin receptor protein 1 OS=Homo sapiens GN=TFRC PE=1 SV=2 - [TFR1_HUMAN]	16.45	1	9	9	80	14.34	7	14	10.66	6	12	10.66	6	12	12.76	8	16	10.66	6	13	12.76	8	13
P15170	Eukaryotic peptide chain release factor GTP-binding subunit ERF3A OS=Homo sapiens GN=GSPT1 PE=1 SV=1 - [ERF3A_HUMAN]	16.43	2	8	8	54	8.82	3	5	13.43	5	9	13.43	6	10	14.23	6	11	16.43	8	11	13.43	6	8
P82664	28S ribosomal protein S10, mitochondrial OS=Homo sapiens GN=MRPS10 PE=1 SV=2 - [RT10_HUMAN]	16.42	1	2	2	10	5.97	1	2				16.42	2	3	16.42	2	3	5.97	1	2
P28331	NADH-ubiquinone oxidoreductase 75 kDa subunit, mitochondrial OS=Homo sapiens GN=NDUFS1 PE=1 SV=3 - [NDUS1_HUMAN]	16.37	1	8	8	60	14.31	7	11	10.32	5	8	14.72	7	13	14.31	7	10	14.31	7	11	10.73	5	7
Q6ZSJ8	Uncharacterized protein C1orf122 OS=Homo sapiens GN=C1orf122 PE=2 SV=2 - [CA122_HUMAN]	16.36	1	1	1	5	16.36	1	2	16.36	1	2				16.36	1	1
P05452	Tetranectin OS=Homo sapiens GN=CLEC3B PE=1 SV=3 - [TETN_HUMAN]	16.34	1	2	2	12	10.4	1	2	10.4	1	2	10.4	1	3	10.4	1	2	10.4	1	1	16.34	2	2
O00273	DNA fragmentation factor subunit alpha OS=Homo sapiens GN=DFFA PE=1 SV=1 - [DFFA_HUMAN]	16.31	1	6	6	24	3.32	1	1	16.01	4	5	10.88	4	5	16.31	4	4	10.88	3	6	10.88	3	3
Q86U28	Iron-sulfur cluster assembly 2 homolog, mitochondrial OS=Homo sapiens GN=ISCA2 PE=1 SV=2 - [ISCA2_HUMAN]	16.23	1	1	1	2				16.23	1	1	16.23	1	1
Q6EEV4	DNA-directed RNA polymerase II subunit GRINL1A, isoforms 4/5 OS=Homo sapiens GN=POLR2M PE=1 SV=1 - [GL1AD_HUMAN]	16.22	1	1	1	13	16.22	1	3	16.22	1	2	16.22	1	2	16.22	1	2	16.22	1	2	16.22	1	2
Q96I25	Splicing factor 45 OS=Homo sapiens GN=RBM17 PE=1 SV=1 - [SPF45_HUMAN]	16.21	1	6	6	18	4.49	1	1	7.98	3	3	8.48	3	5	8.23	3	6				8.48	3	3
Q9BXP5	Serrate RNA effector molecule homolog OS=Homo sapiens GN=SRRT PE=1 SV=1 - [SRRT_HUMAN]	16.21	1	12	12	55	5.94	4	7	5.02	3	5	13.24	8	12	9.59	7	13	11.53	7	8	8.9	6	10
Q96S44	TP53-regulating kinase OS=Homo sapiens GN=TP53RK PE=1 SV=2 - [PRPK_HUMAN]	16.21	1	4	4	37	15.02	3	9	15.02	3	5	15.02	3	8	15.02	3	6	15.02	3	5	16.21	3	4
Q9UNI6	Dual specificity protein phosphatase 12 OS=Homo sapiens GN=DUSP12 PE=1 SV=1 - [DUS12_HUMAN]	16.18	1	3	3	17	4.41	1	1	4.41	1	2	4.41	1	3	16.18	3	6	4.41	1	2	4.41	1	3
P03928	ATP synthase protein 8 OS=Homo sapiens GN=MT-ATP8 PE=1 SV=1 - [ATP8_HUMAN]	16.18	1	1	1	1													16.18	1	1
Q08J23	tRNA (cytosine(34)-C(5))-methyltransferase OS=Homo sapiens GN=NSUN2 PE=1 SV=2 - [NSUN2_HUMAN]	16.17	1	8	8	21	1.96	1	1	3.39	2	3	9.78	5	8	9.78	5	7	4.04	2	2
P11177	Pyruvate dehydrogenase E1 component subunit beta, mitochondrial OS=Homo sapiens GN=PDHB PE=1 SV=3 - [ODPB_HUMAN]	16.16	1	6	6	50	13.09	4	8	13.09	4	8	13.09	5	7	13.09	5	9	16.16	5	12	13.09	3	6
P27707	Deoxycytidine kinase OS=Homo sapiens GN=DCK PE=1 SV=1 - [DCK_HUMAN]	16.15	1	3	3	11	5.77	1	2	5.77	1	1	16.15	3	4	13.08	2	2	5.77	1	1	5.77	1	1
Q9H9B4	Sideroflexin-1 OS=Homo sapiens GN=SFXN1 PE=1 SV=4 - [SFXN1_HUMAN]	16.15	1	2	4	13	4.04	1	1	6.83	2	2	12.73	3	3	4.04	1	1	10.25	3	5	4.04	1	1
Q9H0D6	5'-3' exoribonuclease 2 OS=Homo sapiens GN=XRN2 PE=1 SV=1 - [XRN2_HUMAN]	16.11	1	10	10	49	4.74	4	8	5.37	5	8	5.16	4	7	9.26	6	8	8.53	6	14	2.84	3	4
Q96BP2	Coiled-coil-helix-coiled-coil-helix domain-containing protein 1 OS=Homo sapiens GN=CHCHD1 PE=1 SV=1 - [CHCH1_HUMAN]	16.1	1	1	1	5	16.1	1	1	16.1	1	1	16.1	1	1	16.1	1	1	16.1	1	1
Q13541	Eukaryotic translation initiation factor 4E-binding protein 1 OS=Homo sapiens GN=EIF4EBP1 PE=1 SV=3 - [4EBP1_HUMAN]	16.1	1	1	1	4										16.1	1	3				16.1	1	1
Q9Y2D5	A-kinase anchor protein 2 OS=Homo sapiens GN=AKAP2 PE=1 SV=3 - [AKAP2_HUMAN]	16.07	1	7	7	47	5.82	3	4	5.82	3	7	7.22	3	7	12.22	6	11	11.99	5	9	11.99	5	9
Q9BY44	Eukaryotic translation initiation factor 2A OS=Homo sapiens GN=EIF2A PE=1 SV=3 - [EIF2A_HUMAN]	16.07	1	6	6	26	2.91	1	3	5.98	2	6	2.91	1	1	13.33	5	7	11.45	4	7	6.67	2	2
P04632	Calpain small subunit 1 OS=Homo sapiens GN=CAPNS1 PE=1 SV=1 - [CPNS1_HUMAN]	16.04	1	3	3	17	12.31	2	4	7.09	2	3	3.36	1	2	12.31	2	6				12.31	2	2
P11234	Ras-related protein Ral-B OS=Homo sapiens GN=RALB PE=1 SV=1 - [RALB_HUMAN]	16.02	2	3	3	30	7.28	2	7	7.28	2	5	7.28	2	5	16.02	3	6	16.02	3	4	7.28	2	3
Q15836	Vesicle-associated membrane protein 3 OS=Homo sapiens GN=VAMP3 PE=1 SV=3 - [VAMP3_HUMAN]	16	1	1	1	8	16	1	1	16	1	2	16	1	1	16	1	1	16	1	1	16	1	2
P50895	Basal cell adhesion molecule OS=Homo sapiens GN=BCAM PE=1 SV=2 - [BCAM_HUMAN]	15.92	1	6	6	17	4.94	2	5	3.03	1	1	3.03	1	1	14.01	5	5	4.94	2	3	4.94	2	2
Q8N6N7	Acyl-CoA-binding domain-containing protein 7 OS=Homo sapiens GN=ACBD7 PE=1 SV=1 - [ACBD7_HUMAN]	15.91	1	1	1	1													15.91	1	1
P50579	Methionine aminopeptidase 2 OS=Homo sapiens GN=METAP2 PE=1 SV=1 - [MAP2_HUMAN]	15.9	1	4	4	8				3.77	1	1	3.77	1	1	8.37	2	4	3.77	1	1	4.39	1	1
O14949	Cytochrome b-c1 complex subunit 8 OS=Homo sapiens GN=UQCRQ PE=1 SV=4 - [QCR8_HUMAN]	15.85	1	1	1	1													15.85	1	1
Q9BT09	Protein canopy homolog 3 OS=Homo sapiens GN=CNPY3 PE=1 SV=1 - [CNPY3_HUMAN]	15.83	1	4	4	25	7.55	2	4	7.55	2	5	7.55	2	5	14.39	3	3	5.4	2	3	7.55	2	5
P26640	Valine--tRNA ligase OS=Homo sapiens GN=VARS PE=1 SV=4 - [SYVC_HUMAN]	15.82	1	16	16	137	8.31	10	23	8.31	10	18	15.35	15	28	11.23	13	30	9.57	11	21	8.94	11	17
P49736	DNA replication licensing factor MCM2 OS=Homo sapiens GN=MCM2 PE=1 SV=4 - [MCM2_HUMAN]	15.82	1	11	11	48	6.86	5	7	9.18	6	8	7.74	5	6	9.51	6	9	6.86	5	8	8.41	6	10
P61966	AP-1 complex subunit sigma-1A OS=Homo sapiens GN=AP1S1 PE=1 SV=1 - [AP1S1_HUMAN]	15.82	1	1	1	1										15.82	1	1
Q13123	Protein Red OS=Homo sapiens GN=IK PE=1 SV=3 - [RED_HUMAN]	15.8	1	7	7	47	10.23	4	5	8.08	4	9	15.44	6	8	11.67	5	9	8.08	4	7	8.08	4	9
Q9Y2S0	DNA-directed RNA polymerases I and III subunit RPAC2 OS=Homo sapiens GN=POLR1D PE=1 SV=1 - [RPAC2_HUMAN]	15.79	1	2	2	6	8.27	1	1	8.27	1	2	8.27	1	1	15.79	2	2
P18858	DNA ligase 1 OS=Homo sapiens GN=LIG1 PE=1 SV=1 - [DNLI1_HUMAN]	15.78	1	9	9	64	10.12	7	10	7.07	6	7	13.49	8	13	9.25	7	12	8.16	6	11	9.25	7	11
P62877	E3 ubiquitin-protein ligase RBX1 OS=Homo sapiens GN=RBX1 PE=1 SV=1 - [RBX1_HUMAN]	15.74	1	1	1	6	15.74	1	1	15.74	1	1	15.74	1	1	15.74	1	1	15.74	1	1	15.74	1	1
Q9BRQ6	MICOS complex subunit MIC25 OS=Homo sapiens GN=CHCHD6 PE=1 SV=1 - [MIC25_HUMAN]	15.74	1	2	2	8	7.66	1	1	8.09	1	1	15.74	2	3	7.66	1	1	7.66	1	1	8.09	1	1
Q9UDY2	Tight junction protein ZO-2 OS=Homo sapiens GN=TJP2 PE=1 SV=2 - [ZO2_HUMAN]	15.71	1	11	11	58	12.18	8	13	8.91	6	8	11.18	8	10	10.92	8	12	8.82	6	8	7.65	5	7
Q9BQC6	Ribosomal protein 63, mitochondrial OS=Homo sapiens GN=MRPL57 PE=1 SV=1 - [RT63_HUMAN]	15.69	1	1	1	6	15.69	1	1	15.69	1	1	15.69	1	1	15.69	1	1	15.69	1	1	15.69	1	1
Q96S19	UPF0585 protein C16orf13 OS=Homo sapiens GN=C16orf13 PE=1 SV=2 - [CP013_HUMAN]	15.69	1	2	2	7	8.33	1	1	7.35	1	1	8.33	1	1	15.69	2	3				8.33	1	1
Q9NVP1	ATP-dependent RNA helicase DDX18 OS=Homo sapiens GN=DDX18 PE=1 SV=2 - [DDX18_HUMAN]	15.67	1	9	9	39	7.46	3	3	8.51	4	5	10.6	4	8	15.67	8	12	10.15	5	8	5.82	2	3
Q7Z7K6	Centromere protein V OS=Homo sapiens GN=CENPV PE=1 SV=1 - [CENPV_HUMAN]	15.64	1	2	2	10	6.91	1	1	8.73	1	1	8.73	1	2	15.64	2	3	8.73	1	2	8.73	1	1
Q86UP2	Kinectin OS=Homo sapiens GN=KTN1 PE=1 SV=1 - [KTN1_HUMAN]	15.62	1	18	18	99	9.8	10	16	10.17	10	14	9.58	10	15	12.09	13	24	14.44	16	21	9.14	9	9
P51570	Galactokinase OS=Homo sapiens GN=GALK1 PE=1 SV=1 - [GALK1_HUMAN]	15.56	1	3	3	5	7.65	1	1							13.78	2	3	1.79	1	1
P14635	G2/mitotic-specific cyclin-B1 OS=Homo sapiens GN=CCNB1 PE=1 SV=1 - [CCNB1_HUMAN]	15.47	1	5	5	38	12.93	4	6	15.47	5	7	7.85	2	5	12.93	4	5	12.93	4	6	12.93	4	9
Q12765	Secernin-1 OS=Homo sapiens GN=SCRN1 PE=1 SV=2 - [SCRN1_HUMAN]	15.46	1	6	6	42	11.35	5	5	11.35	4	6	11.35	5	9	15.46	6	10	11.35	5	7	7.49	3	5
Q14978	Nucleolar and coiled-body phosphoprotein 1 OS=Homo sapiens GN=NOLC1 PE=1 SV=2 - [NOLC1_HUMAN]	15.45	1	12	12	56	11.44	8	9	3.29	2	2	10.3	6	12	14.31	10	18	8.87	4	9	7.87	4	6
Q86WX3	Active regulator of SIRT1 OS=Homo sapiens GN=RPS19BP1 PE=1 SV=1 - [AROS_HUMAN]	15.44	1	1	1	14	15.44	1	3	15.44	1	2	15.44	1	3	15.44	1	2	15.44	1	2	15.44	1	2
Q16204	Coiled-coil domain-containing protein 6 OS=Homo sapiens GN=CCDC6 PE=1 SV=2 - [CCDC6_HUMAN]	15.4	1	7	7	46	3.16	2	8	3.16	2	3	6.96	4	8	9.7	4	8	5.06	3	6	5.06	3	13
Q9NVA2	Septin-11 OS=Homo sapiens GN=SEPT11 PE=1 SV=3 - [SEP11_HUMAN]	15.38	3	3	5	8							5.59	2	2	9.32	2	3	11.66	3	3
Q8N6M0	OTU domain-containing protein 6B OS=Homo sapiens GN=OTUD6B PE=1 SV=1 - [OTU6B_HUMAN]	15.36	1	3	3	19	9.22	2	4	4.78	1	1	9.22	2	4	15.36	3	4	9.22	2	4	9.22	2	2
Q14157	Ubiquitin-associated protein 2-like OS=Homo sapiens GN=UBAP2L PE=1 SV=2 - [UBP2L_HUMAN]	15.36	1	9	9	41	5.7	4	6	5.43	3	7	7.82	4	6	11.41	7	13	6.72	4	5	4.78	3	4
Q14697	Neutral alpha-glucosidase AB OS=Homo sapiens GN=GANAB PE=1 SV=3 - [GANAB_HUMAN]	15.36	1	13	13	81	11.86	8	12	12.08	9	11	15.36	12	18	12.29	9	14	10.7	9	10	12.08	9	16
Q9UBS4	DnaJ homolog subfamily B member 11 OS=Homo sapiens GN=DNAJB11 PE=1 SV=1 - [DJB11_HUMAN]	15.36	1	5	5	23	6.98	2	2	6.98	2	2	6.98	2	5	15.36	5	6	6.98	2	3	13.69	3	5
Q9UJY5	ADP-ribosylation factor-binding protein GGA1 OS=Homo sapiens GN=GGA1 PE=1 SV=1 - [GGA1_HUMAN]	15.34	1	6	6	10	1.72	1	1				12.99	4	4	2.35	2	2	1.72	1	1	4.07	2	2
P01116	GTPase KRas OS=Homo sapiens GN=KRAS PE=1 SV=1 - [RASK_HUMAN]	15.34	1	1	3	6	7.94	1	1				7.41	1	1	14.29	2	2	7.94	1	1	6.35	1	1
Q13813	Spectrin alpha chain, non-erythrocytic 1 OS=Homo sapiens GN=SPTAN1 PE=1 SV=3 - [SPTN1_HUMAN]	15.33	1	33	33	204	7.56	18	34	6.92	17	32	10.72	22	34	11.12	25	44	10.11	23	36	7.93	17	24
O15160	DNA-directed RNA polymerases I and III subunit RPAC1 OS=Homo sapiens GN=POLR1C PE=1 SV=1 - [RPAC1_HUMAN]	15.32	1	4	4	19	14.16	3	4	4.34	1	2	11.56	2	4	10.4	2	2	8.09	2	3	9.25	3	4
P49821	NADH dehydrogenase [ubiquinone] flavoprotein 1, mitochondrial OS=Homo sapiens GN=NDUFV1 PE=1 SV=4 - [NDUV1_HUMAN]	15.3	1	3	3	15	8.41	2	2	1.94	1	1	8.84	2	2	8.84	2	4	1.94	1	4	1.94	1	2
P61011	Signal recognition particle 54 kDa protein OS=Homo sapiens GN=SRP54 PE=1 SV=1 - [SRP54_HUMAN]	15.28	1	5	5	17	7.34	2	2	11.71	3	4	3.77	1	1	11.71	3	3	6.94	2	3	6.94	3	4
O00399	Dynactin subunit 6 OS=Homo sapiens GN=DCTN6 PE=1 SV=1 - [DCTN6_HUMAN]	15.26	1	3	3	7				9.47	1	1	9.47	1	1	15.26	3	3	9.47	1	1	9.47	1	1
P19525	Interferon-induced, double-stranded RNA-activated protein kinase OS=Homo sapiens GN=EIF2AK2 PE=1 SV=2 - [E2AK2_HUMAN]	15.25	1	4	4	27	11.07	3	4	11.07	3	4	6.17	2	4	12.34	3	4	15.25	4	5	11.07	3	6
O00217	NADH dehydrogenase [ubiquinone] iron-sulfur protein 8, mitochondrial OS=Homo sapiens GN=NDUFS8 PE=1 SV=1 - [NDUS8_HUMAN]	15.24	1	3	3	27	15.24	2	3	15.24	3	5	15.24	3	4	15.24	3	4	15.24	3	7	15.24	3	4
P36969	Phospholipid hydroperoxide glutathione peroxidase, mitochondrial OS=Homo sapiens GN=GPX4 PE=1 SV=3 - [GPX4_HUMAN]	15.23	1	2	2	14	9.14	1	3	9.14	1	2	9.14	1	3	15.23	2	3	9.14	1	2	9.14	1	1
P15374	Ubiquitin carboxyl-terminal hydrolase isozyme L3 OS=Homo sapiens GN=UCHL3 PE=1 SV=1 - [UCHL3_HUMAN]	15.22	1	2	2	8	8.26	1	2	8.26	1	2	8.26	1	1	15.22	2	3
Q9BQ48	39S ribosomal protein L34, mitochondrial OS=Homo sapiens GN=MRPL34 PE=1 SV=1 - [RM34_HUMAN]	15.22	1	1	1	8	15.22	1	2	15.22	1	1	15.22	1	1	15.22	1	1	15.22	1	1	15.22	1	2
Q13200	26S proteasome non-ATPase regulatory subunit 2 OS=Homo sapiens GN=PSMD2 PE=1 SV=3 - [PSMD2_HUMAN]	15.2	1	9	9	62	13.11	7	14	5.51	3	4	13.11	8	17	15.2	9	10	8.7	5	9	10.46	5	8
Q9BSV6	tRNA-splicing endonuclease subunit Sen34 OS=Homo sapiens GN=TSEN34 PE=1 SV=1 - [SEN34_HUMAN]	15.16	1	3	3	10	4.84	1	1	9.03	2	4	15.16	3	4	4.84	1	1
Q3LXA3	Bifunctional ATP-dependent dihydroxyacetone kinase/FAD-AMP lyase (cyclizing) OS=Homo sapiens GN=DAK PE=1 SV=2 - [DHAK_HUMAN]	15.13	1	6	6	23	8	2	3	6.61	2	5	10.96	3	4	3.83	1	5	3.83	2	4	3.83	1	2
Q9UN37	Vacuolar protein sorting-associated protein 4A OS=Homo sapiens GN=VPS4A PE=1 SV=1 - [VPS4A_HUMAN]	15.1	3	6	6	33	15.1	5	6	12.59	3	5	15.1	4	6	10.53	4	4	12.59	3	8	12.59	3	4
Q15287	RNA-binding protein with serine-rich domain 1 OS=Homo sapiens GN=RNPS1 PE=1 SV=1 - [RNPS1_HUMAN]	15.08	1	6	6	48	15.08	5	9	12.46	4	5	15.08	6	10	15.08	5	9	15.08	5	8	15.08	6	7
P0CG12	Chromosome transmission fidelity protein 8 homolog isoform 2 OS=Homo sapiens GN=CHTF8 PE=1 SV=1 - [CTF8A_HUMAN]	15.08	1	4	4	10	4.39	1	1				2.67	1	1	7.06	2	2	4.39	1	1	9.73	2	5
Q7LBR1	Charged multivesicular body protein 1b OS=Homo sapiens GN=CHMP1B PE=1 SV=1 - [CHM1B_HUMAN]	15.08	1	2	2	18	15.08	2	2	6.03	1	3	15.08	2	3	15.08	2	3	15.08	2	3	15.08	2	4
P98175	RNA-binding protein 10 OS=Homo sapiens GN=RBM10 PE=1 SV=3 - [RBM10_HUMAN]	15.05	1	9	9	63	5.7	3	6	11.51	6	14	7.31	4	8	11.72	7	13	11.94	6	9	12.15	6	13
P09525	Annexin A4 OS=Homo sapiens GN=ANXA4 PE=1 SV=4 - [ANXA4_HUMAN]	15.05	1	5	5	29	13.48	3	4	13.48	4	4	13.48	4	6	11.6	4	4	13.48	4	7	13.48	3	4
O95831	Apoptosis-inducing factor 1, mitochondrial OS=Homo sapiens GN=AIFM1 PE=1 SV=1 - [AIFM1_HUMAN]	15.01	1	7	7	37	9.62	5	9	3.92	3	4	9.79	5	8	11.75	6	7	4.73	2	4	7.01	4	5
P01344	Insulin-like growth factor II OS=Homo sapiens GN=IGF2 PE=1 SV=1 - [IGF2_HUMAN]	15	1	3	3	12	5	1	1	5	1	1	13.89	2	2	15	3	5	5	1	1	13.89	2	2
Q9H3N1	Thioredoxin-related transmembrane protein 1 OS=Homo sapiens GN=TMX1 PE=1 SV=1 - [TMX1_HUMAN]	15	1	3	3	18	3.93	1	2	3.93	1	1	3.93	1	3	15	3	5	3.93	1	4	3.93	1	3
Q6GMV3	Putative peptidyl-tRNA hydrolase PTRHD1 OS=Homo sapiens GN=PTRHD1 PE=1 SV=1 - [PTRD1_HUMAN]	15	1	1	1	5				15	1	1	15	1	1	15	1	1	15	1	2
Q15528	Mediator of RNA polymerase II transcription subunit 22 OS=Homo sapiens GN=MED22 PE=1 SV=2 - [MED22_HUMAN]	15	1	2	2	4							8	1	1				15	2	3
O95801	Tetratricopeptide repeat protein 4 OS=Homo sapiens GN=TTC4 PE=1 SV=3 - [TTC4_HUMAN]	14.99	1	3	3	13	12.14	2	4				3.62	1	1	14.99	3	3	12.14	2	3	3.62	1	2
P49588	Alanine--tRNA ligase, cytoplasmic OS=Homo sapiens GN=AARS PE=1 SV=2 - [SYAC_HUMAN]	14.98	1	15	15	77	10.95	9	15	5.06	5	8	12.09	13	18	8.57	8	13	7.95	7	12	8.47	8	11
P53814	Smoothelin OS=Homo sapiens GN=SMTN PE=1 SV=7 - [SMTN_HUMAN]	14.94	1	8	8	40	7.96	4	8	5.89	3	3	6.65	4	6	12.54	6	12	9.27	5	7	7.2	4	4
P10319	HLA class I histocompatibility antigen, B-58 alpha chain OS=Homo sapiens GN=HLA-B PE=1 SV=1 - [1B58_HUMAN]	14.92	25	1	4	20	3.04	1	1	3.04	1	2	6.08	2	2	14.92	4	9	10.22	3	5	3.04	1	1
Q99613	Eukaryotic translation initiation factor 3 subunit C OS=Homo sapiens GN=EIF3C PE=1 SV=1 - [EIF3C_HUMAN]	14.9	2	15	15	85	9.64	8	11	8.11	7	15	8.11	9	14	11.61	12	20	10.3	9	12	8.11	7	13
Q9NWV8	BRISC and BRCA1-A complex member 1 OS=Homo sapiens GN=BABAM1 PE=1 SV=1 - [BABA1_HUMAN]	14.89	1	2	2	10	7.9	1	1	7.9	1	3				7.9	1	2	14.89	2	3	7.9	1	1
P62699	Protein yippee-like 5 OS=Homo sapiens GN=YPEL5 PE=1 SV=1 - [YPEL5_HUMAN]	14.88	1	1	1	1				14.88	1	1
P51911	Calponin-1 OS=Homo sapiens GN=CNN1 PE=1 SV=2 - [CNN1_HUMAN]	14.81	1	2	2	17	8.42	1	2	8.42	1	3	8.42	1	3	14.81	2	4	8.42	1	3	8.42	1	2
Q9HAV7	GrpE protein homolog 1, mitochondrial OS=Homo sapiens GN=GRPEL1 PE=1 SV=2 - [GRPE1_HUMAN]	14.75	1	4	4	17	5.99	1	1	9.68	2	2	14.75	3	3	14.75	4	6	11.06	2	3	9.68	2	2
Q15738	Sterol-4-alpha-carboxylate 3-dehydrogenase, decarboxylating OS=Homo sapiens GN=NSDHL PE=1 SV=2 - [NSDHL_HUMAN]	14.75	1	3	3	15				5.09	1	1	9.12	2	4	14.75	3	6	4.02	1	2	5.09	1	2
Q9BXS6	Nucleolar and spindle-associated protein 1 OS=Homo sapiens GN=NUSAP1 PE=1 SV=1 - [NUSAP_HUMAN]	14.74	1	6	6	16	9.52	3	4	6.58	2	2	4.08	1	1	9.3	3	4	9.3	3	3	6.58	2	2
P53384	Cytosolic Fe-S cluster assembly factor NUBP1 OS=Homo sapiens GN=NUBP1 PE=1 SV=2 - [NUBP1_HUMAN]	14.69	1	3	3	18	5.63	1	1	11.25	2	3	11.25	2	2	11.25	2	5	9.06	2	3	5.63	1	4
P62834	Ras-related protein Rap-1A OS=Homo sapiens GN=RAP1A PE=1 SV=1 - [RAP1A_HUMAN]	14.67	1	1	2	14	7.61	1	1	14.67	2	2	14.67	2	3	7.61	1	2	14.67	2	4	14.67	2	2
P57764	Gasdermin-D OS=Homo sapiens GN=GSDMD PE=1 SV=1 - [GSDMD_HUMAN]	14.67	1	4	4	13	4.75	1	2	4.75	1	1	10.95	3	4	8.47	2	4	4.75	1	1	4.75	1	1
A6NIZ1	Ras-related protein Rap-1b-like protein OS=Homo sapiens PE=2 SV=1 - [RP1BL_HUMAN]	14.67	2	1	2	21	14.67	2	5	14.67	2	2	14.67	2	4	14.67	2	4	14.67	2	3	14.67	2	3
O95400	CD2 antigen cytoplasmic tail-binding protein 2 OS=Homo sapiens GN=CD2BP2 PE=1 SV=1 - [CD2B2_HUMAN]	14.66	1	5	5	10							6.16	2	2	11.44	3	6	3.52	1	1	3.52	1	1
Q9NY33	Dipeptidyl peptidase 3 OS=Homo sapiens GN=DPP3 PE=1 SV=2 - [DPP3_HUMAN]	14.65	1	7	7	28	7.6	3	3	6.24	3	4	10.18	4	5	14.38	6	10	3.93	2	3	3.93	2	3
O43464	Serine protease HTRA2, mitochondrial OS=Homo sapiens GN=HTRA2 PE=1 SV=2 - [HTRA2_HUMAN]	14.63	1	3	3	10	2.62	1	1				7.86	2	4	7.86	2	2	9.39	2	2	2.62	1	1
Q9UDY4	DnaJ homolog subfamily B member 4 OS=Homo sapiens GN=DNAJB4 PE=1 SV=1 - [DNJB4_HUMAN]	14.54	1	4	6	31	13.06	4	6	8.31	3	3	8.61	4	5	14.24	4	8	8.31	3	5	13.95	3	4
P25788	Proteasome subunit alpha type-3 OS=Homo sapiens GN=PSMA3 PE=1 SV=2 - [PSA3_HUMAN]	14.51	1	3	3	12	4.71	1	1	4.71	1	1	4.71	1	3	14.51	3	3	10.98	2	2	4.71	1	2
Q9UHB9	Signal recognition particle subunit SRP68 OS=Homo sapiens GN=SRP68 PE=1 SV=2 - [SRP68_HUMAN]	14.51	1	5	5	24	10.05	3	5	9.41	3	5	10.05	3	3	10.05	3	5	9.09	3	3	7.02	2	3
Q9H496	Torsin-1A-interacting protein 2, isoform IFRG15 OS=Homo sapiens GN=TOR1AIP2 PE=2 SV=1 - [IFG15_HUMAN]	14.5	1	1	1	7	14.5	1	2				14.5	1	2	14.5	1	1	14.5	1	2
Q92734	Protein TFG OS=Homo sapiens GN=TFG PE=1 SV=2 - [TFG_HUMAN]	14.5	2	4	4	37	14.5	4	5	7.25	3	5	14.25	3	7	14.5	4	10	7	2	4	14.25	3	6
P08729	Keratin, type II cytoskeletal 7 OS=Homo sapiens GN=KRT7 PE=1 SV=5 - [K2C7_HUMAN]	14.5	13	1	7	42	6.4	4	6	4.9	2	4	12.15	5	9	7.25	5	9	6.4	5	7	6.4	5	7
Q6SPF0	Atherin OS=Homo sapiens GN=SAMD1 PE=1 SV=1 - [SAMD1_HUMAN]	14.5	1	3	3	6				8.18	2	2				10.04	2	2	4.46	1	1	6.32	1	1
Q15388	Mitochondrial import receptor subunit TOM20 homolog OS=Homo sapiens GN=TOMM20 PE=1 SV=1 - [TOM20_HUMAN]	14.48	1	2	2	5							8.97	1	1	5.52	1	2	8.97	1	1	8.97	1	1
Q9BVK6	Transmembrane emp24 domain-containing protein 9 OS=Homo sapiens GN=TMED9 PE=1 SV=2 - [TMED9_HUMAN]	14.47	2	2	2	9	7.23	1	1							14.47	2	6	7.23	1	2
O00116	Alkyldihydroxyacetonephosphate synthase, peroxisomal OS=Homo sapiens GN=AGPS PE=1 SV=1 - [ADAS_HUMAN]	14.44	1	6	6	29	10.18	4	5	5.32	2	3	9.57	4	6	8.05	3	6	5.32	2	3	5.32	2	6
P60903	Protein S100-A10 OS=Homo sapiens GN=S100A10 PE=1 SV=2 - [S10AA_HUMAN]	14.43	1	1	1	6	14.43	1	1	14.43	1	1	14.43	1	1	14.43	1	1	14.43	1	1	14.43	1	1
P12270	Nucleoprotein TPR OS=Homo sapiens GN=TPR PE=1 SV=3 - [TPR_HUMAN]	14.43	1	24	24	94	5.12	9	15	5.08	9	9	8	12	18	8.63	13	19	6.9	11	15	7.91	14	18
P06454	Prothymosin alpha OS=Homo sapiens GN=PTMA PE=1 SV=2 - [PTMA_HUMAN]	14.41	1	3	3	24	12.61	2	5	12.61	2	3	12.61	2	5	14.41	3	4	12.61	2	5	12.61	2	2
Q9UFG5	UPF0449 protein C19orf25 OS=Homo sapiens GN=C19orf25 PE=1 SV=2 - [CS025_HUMAN]	14.41	1	1	1	16	14.41	1	2	14.41	1	1	14.41	1	5	14.41	1	2	14.41	1	2	14.41	1	4
Q8WX93	Palladin OS=Homo sapiens GN=PALLD PE=1 SV=3 - [PALLD_HUMAN]	14.39	1	13	13	87	9.91	8	17	6.94	6	13	13.23	11	20	11.21	9	15	9.04	7	11	7.88	7	11
Q86YP4	Transcriptional repressor p66-alpha OS=Homo sapiens GN=GATAD2A PE=1 SV=1 - [P66A_HUMAN]	14.38	1	5	6	26	4.11	2	4	3.63	2	4	5.69	3	5	7.42	4	4	6.16	3	4	8.21	3	5
P55957	BH3-interacting domain death agonist OS=Homo sapiens GN=BID PE=1 SV=1 - [BID_HUMAN]	14.36	1	2	2	12	14.36	2	4	14.36	2	2				5.64	1	2	5.64	1	2	14.36	2	2
P42167	Lamina-associated polypeptide 2, isoforms beta/gamma OS=Homo sapiens GN=TMPO PE=1 SV=2 - [LAP2B_HUMAN]	14.32	1	1	6	37	7.71	4	5	11.23	4	7	10.79	4	5	14.32	5	8	14.32	6	7	7.71	3	5
P30837	Aldehyde dehydrogenase X, mitochondrial OS=Homo sapiens GN=ALDH1B1 PE=1 SV=3 - [AL1B1_HUMAN]	14.31	1	5	5	31	5.61	2	2	5.61	2	3	8.32	3	5	14.31	5	8	8.32	3	6	11.03	4	7
Q8TCS8	Polyribonucleotide nucleotidyltransferase 1, mitochondrial OS=Homo sapiens GN=PNPT1 PE=1 SV=2 - [PNPT1_HUMAN]	14.3	1	11	11	86	9.45	6	12	7.28	4	11	14.05	7	17	14.18	9	25	10.86	6	11	9.45	5	10
P37840	Alpha-synuclein OS=Homo sapiens GN=SNCA PE=1 SV=1 - [SYUA_HUMAN]	14.29	1	1	1	1	14.29	1	1
Q06587	E3 ubiquitin-protein ligase RING1 OS=Homo sapiens GN=RING1 PE=1 SV=2 - [RING1_HUMAN]	14.29	1	2	4	31	14.29	4	4	10.84	3	4	14.29	4	8	14.29	4	7	14.29	4	4	10.84	3	4
Q9UDW1	Cytochrome b-c1 complex subunit 9 OS=Homo sapiens GN=UQCR10 PE=1 SV=3 - [QCR9_HUMAN]	14.29	1	1	1	1										14.29	1	1
P11387	DNA topoisomerase 1 OS=Homo sapiens GN=TOP1 PE=1 SV=2 - [TOP1_HUMAN]	14.25	2	13	13	88	10.33	6	7	10.46	8	16	12.03	8	22	10.85	8	15	12.81	10	18	8.5	5	10
P25490	Transcriptional repressor protein YY1 OS=Homo sapiens GN=YY1 PE=1 SV=2 - [TYY1_HUMAN]	14.25	3	5	5	19	1.93	1	1	1.93	1	3	5.8	2	3	10.87	3	5	2.9	2	3	8.21	3	4
P54136	Arginine--tRNA ligase, cytoplasmic OS=Homo sapiens GN=RARS PE=1 SV=2 - [SYRC_HUMAN]	14.24	1	6	6	58	9.7	4	11	11.67	5	10	12.73	5	10	9.7	4	6	14.24	6	9	11.67	5	12
Q9H0Z9	RNA-binding protein 38 OS=Homo sapiens GN=RBM38 PE=1 SV=2 - [RBM38_HUMAN]	14.23	2	2	2	19	14.23	2	4	14.23	2	4	14.23	2	3	14.23	2	3	14.23	2	3	14.23	2	2
Q9NTJ3	Structural maintenance of chromosomes protein 4 OS=Homo sapiens GN=SMC4 PE=1 SV=2 - [SMC4_HUMAN]	14.21	1	16	16	76	6.83	7	13	5.51	5	10	8.62	10	14	6.37	8	10	9.01	11	17	5.43	6	12
Q7Z7C8	Transcription initiation factor TFIID subunit 8 OS=Homo sapiens GN=TAF8 PE=1 SV=1 - [TAF8_HUMAN]	14.19	1	2	2	15	5.16	1	3	5.16	1	3	14.19	2	3	5.16	1	3	5.16	1	1	5.16	1	2
Q6PK04	Coiled-coil domain-containing protein 137 OS=Homo sapiens GN=CCDC137 PE=1 SV=1 - [CC137_HUMAN]	14.19	1	3	3	16	6.23	1	1	6.23	1	3	6.23	1	1	10.73	2	4	6.23	1	2	9.69	2	5
P46109	Crk-like protein OS=Homo sapiens GN=CRKL PE=1 SV=1 - [CRKL_HUMAN]	14.19	1	3	3	5				5.94	1	1				3.63	1	1	4.62	1	2	4.62	1	1
P19387	DNA-directed RNA polymerase II subunit RPB3 OS=Homo sapiens GN=POLR2C PE=1 SV=2 - [RPB3_HUMAN]	14.18	1	2	2	8	6.91	1	1	7.27	1	1	14.18	2	2	6.91	1	1	14.18	2	2	6.91	1	1
Q9BUL8	Programmed cell death protein 10 OS=Homo sapiens GN=PDCD10 PE=1 SV=1 - [PDC10_HUMAN]	14.15	1	2	2	12	14.15	2	2	9.43	1	1	14.15	2	2	14.15	2	3	14.15	2	2	14.15	2	2
Q9NQ92	Coordinator of PRMT5 and differentiation stimulator OS=Homo sapiens GN=COPRS PE=1 SV=3 - [COPRS_HUMAN]	14.13	1	1	1	9	14.13	1	2	14.13	1	2	14.13	1	2	14.13	1	1	14.13	1	1	14.13	1	1
P10109	Adrenodoxin, mitochondrial OS=Homo sapiens GN=FDX1 PE=1 SV=1 - [ADX_HUMAN]	14.13	1	2	2	8	4.89	1	1	4.89	1	1	4.89	1	1	14.13	2	2	4.89	1	1	4.89	1	2
Q9BZK3	Putative nascent polypeptide-associated complex subunit alpha-like protein OS=Homo sapiens GN=NACAP1 PE=5 SV=1 - [NACP1_HUMAN]	14.08	1	1	3	24	14.08	2	4	14.08	2	3	14.08	3	5	14.08	3	6	14.08	3	3	7.04	1	3
Q9BYD1	39S ribosomal protein L13, mitochondrial OS=Homo sapiens GN=MRPL13 PE=1 SV=1 - [RM13_HUMAN]	14.04	1	2	2	2										14.04	2	2
O76003	Glutaredoxin-3 OS=Homo sapiens GN=GLRX3 PE=1 SV=2 - [GLRX3_HUMAN]	14.03	1	3	3	11	8.06	1	1				5.97	2	3	14.03	3	4	14.03	2	2	5.97	1	1
Q9BX40	Protein LSM14 homolog B OS=Homo sapiens GN=LSM14B PE=1 SV=1 - [LS14B_HUMAN]	14.03	1	4	4	28	9.09	3	5	10.13	3	6	9.09	3	4	14.03	4	4	11.95	3	5	10.13	3	4
Q92530	Proteasome inhibitor PI31 subunit OS=Homo sapiens GN=PSMF1 PE=1 SV=2 - [PSMF1_HUMAN]	14.02	1	2	2	14	14.02	2	2	14.02	2	2	5.54	1	1	14.02	2	5	14.02	2	2	14.02	2	2
Q13751	Laminin subunit beta-3 OS=Homo sapiens GN=LAMB3 PE=1 SV=1 - [LAMB3_HUMAN]	13.99	1	10	10	37	5.12	3	4	3.84	2	7	8.79	5	6	11.18	7	8	5.97	5	7	1.79	1	5
P61968	LIM domain transcription factor LMO4 OS=Homo sapiens GN=LMO4 PE=1 SV=1 - [LMO4_HUMAN]	13.94	1	1	1	12	13.94	1	1	13.94	1	2	13.94	1	3	13.94	1	2	13.94	1	3	13.94	1	1
Q6NZ67	Mitotic-spindle organizing protein 2B OS=Homo sapiens GN=MZT2B PE=1 SV=1 - [MZT2B_HUMAN]	13.92	2	1	1	20	13.92	1	4	13.92	1	4	13.92	1	3	13.92	1	4	13.92	1	3	13.92	1	2
P10644	cAMP-dependent protein kinase type I-alpha regulatory subunit OS=Homo sapiens GN=PRKAR1A PE=1 SV=1 - [KAP0_HUMAN]	13.91	1	4	4	16	6.3	2	2	11.02	3	3	11.02	3	4	9.19	3	3	6.3	2	2	6.3	2	2
P11766	Alcohol dehydrogenase class-3 OS=Homo sapiens GN=ADH5 PE=1 SV=4 - [ADHX_HUMAN]	13.9	1	3	3	24	9.63	2	5	3.48	1	1	9.63	2	4	9.63	2	5	7.75	2	4	9.63	2	5
Q09028	Histone-binding protein RBBP4 OS=Homo sapiens GN=RBBP4 PE=1 SV=3 - [RBBP4_HUMAN]	13.88	1	2	4	45	13.88	4	8	13.88	4	9	13.88	4	9	11.06	3	6	13.88	4	7	13.88	4	6
P17568	NADH dehydrogenase [ubiquinone] 1 beta subcomplex subunit 7 OS=Homo sapiens GN=NDUFB7 PE=1 SV=4 - [NDUB7_HUMAN]	13.87	1	2	2	2							4.38	1	1	9.49	1	1
P49005	DNA polymerase delta subunit 2 OS=Homo sapiens GN=POLD2 PE=1 SV=1 - [DPOD2_HUMAN]	13.86	1	4	4	5	2.35	1	1	3.84	1	1	5.54	1	1	2.35	1	1	2.13	1	1
Q6RW13	Type-1 angiotensin II receptor-associated protein OS=Homo sapiens GN=AGTRAP PE=1 SV=1 - [ATRAP_HUMAN]	13.84	1	1	1	13	13.84	1	1	13.84	1	5	13.84	1	2	13.84	1	2	13.84	1	1	13.84	1	2
Q9NW13	RNA-binding protein 28 OS=Homo sapiens GN=RBM28 PE=1 SV=3 - [RBM28_HUMAN]	13.83	1	7	7	28	1.84	1	2	5.93	3	4	7.25	4	5	6.46	4	4	10.54	5	7	9.22	5	6
Q07021	Complement component 1 Q subcomponent-binding protein, mitochondrial OS=Homo sapiens GN=C1QBP PE=1 SV=1 - [C1QBP_HUMAN]	13.83	1	4	4	37	6.74	3	6	6.74	2	5	13.83	4	8	6.74	3	6	6.74	3	6	6.38	2	6
O43491	Band 4.1-like protein 2 OS=Homo sapiens GN=EPB41L2 PE=1 SV=1 - [E41L2_HUMAN]	13.83	2	9	10	75	6.27	4	9	10.35	5	8	12.84	8	21	8.96	8	15	11.14	6	10	8.76	7	12
Q71RC2	La-related protein 4 OS=Homo sapiens GN=LARP4 PE=1 SV=3 - [LARP4_HUMAN]	13.81	1	7	7	70	10.77	6	10	11.74	6	11	10.77	6	11	10.77	6	11	10.77	6	14	8.7	5	13
Q9Y2X3	Nucleolar protein 58 OS=Homo sapiens GN=NOP58 PE=1 SV=1 - [NOP58_HUMAN]	13.8	1	6	6	21	1.89	1	1	1.32	1	1	3.21	1	2	7.37	4	8	7.94	4	5	7.94	4	4
P63027	Vesicle-associated membrane protein 2 OS=Homo sapiens GN=VAMP2 PE=1 SV=3 - [VAMP2_HUMAN]	13.79	1	1	1	6	13.79	1	1							13.79	1	2				13.79	1	3
Q9ULW0	Targeting protein for Xklp2 OS=Homo sapiens GN=TPX2 PE=1 SV=2 - [TPX2_HUMAN]	13.79	1	7	7	19	2.14	1	1	2.01	1	1	3.88	2	2	7.76	4	6	7.5	4	5	6.16	3	4
Q9BXF6	Rab11 family-interacting protein 5 OS=Homo sapiens GN=RAB11FIP5 PE=1 SV=1 - [RFIP5_HUMAN]	13.78	1	4	4	25	2.91	1	2	7.2	2	3	9.49	3	3	10.11	3	7	7.2	2	3	7.2	2	7
Q9Y617	Phosphoserine aminotransferase OS=Homo sapiens GN=PSAT1 PE=1 SV=2 - [SERC_HUMAN]	13.78	1	3	3	5							4.59	1	2	3.51	1	1	10.27	2	2
Q9H1K1	Iron-sulfur cluster assembly enzyme ISCU, mitochondrial OS=Homo sapiens GN=ISCU PE=1 SV=2 - [ISCU_HUMAN]	13.77	1	1	1	10	13.77	1	2	13.77	1	2	13.77	1	1	13.77	1	3	13.77	1	1	13.77	1	1
P52657	Transcription initiation factor IIA subunit 2 OS=Homo sapiens GN=GTF2A2 PE=1 SV=1 - [T2AG_HUMAN]	13.76	1	1	1	3	13.76	1	1	13.76	1	1										13.76	1	1
Q9NRG0	Chromatin accessibility complex protein 1 OS=Homo sapiens GN=CHRAC1 PE=1 SV=1 - [CHRC1_HUMAN]	13.74	1	1	1	7	13.74	1	1	13.74	1	1	13.74	1	1	13.74	1	1	13.74	1	2	13.74	1	1
O95239	Chromosome-associated kinesin KIF4A OS=Homo sapiens GN=KIF4A PE=1 SV=3 - [KIF4A_HUMAN]	13.72	2	11	11	53	4.71	4	4	7.39	5	7	9.42	7	12	12.66	10	14	10.88	8	10	5.68	5	6
O95229	ZW10 interactor OS=Homo sapiens GN=ZWINT PE=1 SV=2 - [ZWINT_HUMAN]	13.72	1	3	3	12	4.33	1	2							10.11	2	6	7.94	2	2	7.94	2	2
Q9Y3C4	EKC/KEOPS complex subunit TPRKB OS=Homo sapiens GN=TPRKB PE=1 SV=1 - [TPRKB_HUMAN]	13.71	1	2	2	6	8	1	1	8	1	1	8	1	1	13.71	2	2	8	1	1
P47897	Glutamine--tRNA ligase OS=Homo sapiens GN=QARS PE=1 SV=1 - [SYQ_HUMAN]	13.68	1	6	6	56	13.68	6	13	10.06	5	9	13.68	6	12	13.68	6	10	10.06	5	7	10.06	5	5
Q9NXV2	BTB/POZ domain-containing protein KCTD5 OS=Homo sapiens GN=KCTD5 PE=1 SV=1 - [KCTD5_HUMAN]	13.68	1	2	2	4	5.13	1	1				5.13	1	1	13.68	1	1	5.13	1	1
Q9H2P9	Diphthine synthase OS=Homo sapiens GN=DPH5 PE=1 SV=2 - [DPH5_HUMAN]	13.68	1	2	2	5							13.68	2	2	4.91	1	1	4.91	1	1	4.91	1	1
P24539	ATP synthase F(0) complex subunit B1, mitochondrial OS=Homo sapiens GN=ATP5F1 PE=1 SV=2 - [AT5F1_HUMAN]	13.67	1	3	3	16	7.03	2	5				3.91	1	2	10.55	2	4	10.55	2	3	10.55	2	2
Q13084	39S ribosomal protein L28, mitochondrial OS=Homo sapiens GN=MRPL28 PE=1 SV=4 - [RM28_HUMAN]	13.67	1	2	2	3							9.38	1	2	4.3	1	1
Q9Y5M8	Signal recognition particle receptor subunit beta OS=Homo sapiens GN=SRPRB PE=1 SV=3 - [SRPRB_HUMAN]	13.65	1	4	4	40	13.65	3	8	13.65	4	7	13.65	3	5	13.65	3	6	13.65	3	6	13.65	3	8
Q1KMD3	Heterogeneous nuclear ribonucleoprotein U-like protein 2 OS=Homo sapiens GN=HNRNPUL2 PE=1 SV=1 - [HNRL2_HUMAN]	13.65	1	7	7	39	8.17	4	7	6.43	3	4	10.71	5	9	8.17	4	5	10.98	6	7	9.77	5	7
P06132	Uroporphyrinogen decarboxylase OS=Homo sapiens GN=UROD PE=1 SV=2 - [DCUP_HUMAN]	13.62	1	4	4	28	10.08	2	3	12.53	3	6	13.62	4	6	12.53	3	3	13.62	4	6	10.08	2	4
Q99959	Plakophilin-2 OS=Homo sapiens GN=PKP2 PE=1 SV=2 - [PKP2_HUMAN]	13.62	1	8	8	35	3.41	3	4	9.19	5	5	12.03	7	8	8.17	5	6	7.83	4	5	5.68	3	7
Q6PJT7	Zinc finger CCCH domain-containing protein 14 OS=Homo sapiens GN=ZC3H14 PE=1 SV=1 - [ZC3HE_HUMAN]	13.59	1	7	7	34	8.56	4	5	8.97	3	6	8.56	3	3	9.65	4	8	8.97	4	5	13.59	5	7
P51659	Peroxisomal multifunctional enzyme type 2 OS=Homo sapiens GN=HSD17B4 PE=1 SV=3 - [DHB4_HUMAN]	13.59	1	12	12	63	11.01	6	10	11.01	5	10	13.18	8	10	11.01	7	12	11.14	7	9	11.41	8	12
Q9Y285	Phenylalanine--tRNA ligase alpha subunit OS=Homo sapiens GN=FARSA PE=1 SV=3 - [SYFA_HUMAN]	13.58	1	4	4	20	8.66	2	2	5.51	2	2	11.42	3	5	11.42	3	3	4.92	2	2	5.51	2	6
Q15428	Splicing factor 3A subunit 2 OS=Homo sapiens GN=SF3A2 PE=1 SV=2 - [SF3A2_HUMAN]	13.58	1	4	4	26	7.97	2	2	13.58	4	4	13.58	4	7	7.76	3	3	11.42	3	4	7.76	3	6
P31040	Succinate dehydrogenase [ubiquinone] flavoprotein subunit, mitochondrial OS=Homo sapiens GN=SDHA PE=1 SV=2 - [SDHA_HUMAN]	13.55	1	8	8	35	8.13	5	8	5.57	4	5	8.89	6	7	10.99	6	7	6.33	4	4	6.33	3	4
Q8N6T3	ADP-ribosylation factor GTPase-activating protein 1 OS=Homo sapiens GN=ARFGAP1 PE=1 SV=2 - [ARFG1_HUMAN]	13.55	1	3	3	16	4.43	1	1	9.11	2	2	13.55	3	5	9.11	2	2	9.11	2	2	9.11	2	4
P04899	Guanine nucleotide-binding protein G(i) subunit alpha-2 OS=Homo sapiens GN=GNAI2 PE=1 SV=3 - [GNAI2_HUMAN]	13.52	8	2	5	22	8.73	3	4	9.58	2	2	9.58	3	5	12.68	3	5	8.73	2	2	12.68	3	4
Q8TF68	Zinc finger protein 384 OS=Homo sapiens GN=ZNF384 PE=1 SV=2 - [ZN384_HUMAN]	13.52	2	5	5	32	6.41	3	5	7.28	3	5	6.41	3	8	9.88	4	5	10.05	4	5	11.27	4	4
Q9UNS2	COP9 signalosome complex subunit 3 OS=Homo sapiens GN=COPS3 PE=1 SV=3 - [CSN3_HUMAN]	13.48	1	6	6	41	9.69	4	7	8.04	3	4	12.77	5	10	8.04	3	9	13.48	5	6	9.69	4	5
Q9BRT9	DNA replication complex GINS protein SLD5 OS=Homo sapiens GN=GINS4 PE=1 SV=1 - [SLD5_HUMAN]	13.45	1	3	3	15	7.17	1	1	7.17	2	2	13.45	3	5	7.17	1	2	13.45	2	2	13.45	2	3
Q14676	Mediator of DNA damage checkpoint protein 1 OS=Homo sapiens GN=MDC1 PE=1 SV=3 - [MDC1_HUMAN]	13.45	1	9	9	39	7.13	5	6	8.19	5	7				11.2	7	12	5.03	3	5	6.61	4	9
P35222	Catenin beta-1 OS=Homo sapiens GN=CTNNB1 PE=1 SV=1 - [CTNB1_HUMAN]	13.44	1	6	6	50	7.55	3	5	10.76	5	9	12.16	5	12	10.76	5	9	9.48	4	7	10.76	5	8
Q9BYC9	39S ribosomal protein L20, mitochondrial OS=Homo sapiens GN=MRPL20 PE=1 SV=1 - [RM20_HUMAN]	13.42	1	2	2	3	7.38	1	1	6.04	1	1				7.38	1	1
P49756	RNA-binding protein 25 OS=Homo sapiens GN=RBM25 PE=1 SV=3 - [RBM25_HUMAN]	13.4	1	10	10	57	10.56	7	12	7.24	6	6	13.4	8	8	11.63	9	12	13.4	8	12	10.08	6	7
P31937	3-hydroxyisobutyrate dehydrogenase, mitochondrial OS=Homo sapiens GN=HIBADH PE=1 SV=2 - [3HIDH_HUMAN]	13.39	1	2	2	11	13.39	2	3	13.39	2	2	8.04	1	1	13.39	2	2	13.39	2	2	8.04	1	1
O94906	Pre-mRNA-processing factor 6 OS=Homo sapiens GN=PRPF6 PE=1 SV=1 - [PRP6_HUMAN]	13.39	1	7	7	29	1.81	1	2	4.36	3	8	7.33	5	6	9.14	4	6	7.33	5	6	1.81	1	1
Q9Y6G3	39S ribosomal protein L42, mitochondrial OS=Homo sapiens GN=MRPL42 PE=1 SV=1 - [RM42_HUMAN]	13.38	1	1	1	1	13.38	1	1
O15392	Baculoviral IAP repeat-containing protein 5 OS=Homo sapiens GN=BIRC5 PE=1 SV=3 - [BIRC5_HUMAN]	13.38	1	1	1	3										13.38	1	3
Q8NFX7	Syntaxin-binding protein 6 OS=Homo sapiens GN=STXBP6 PE=1 SV=2 - [STXB6_HUMAN]	13.33	1	2	2	5							7.14	1	1	7.14	1	1	13.33	2	2	7.14	1	1
P35527	Keratin, type I cytoskeletal 9 OS=Homo sapiens GN=KRT9 PE=1 SV=3 - [K1C9_HUMAN]	13.32	1	5	5	6													13.32	5	6
Q9Y5B8	Nucleoside diphosphate kinase 7 OS=Homo sapiens GN=NME7 PE=1 SV=1 - [NDK7_HUMAN]	13.3	1	3	3	5							6.12	1	1	13.3	3	4
Q9H6S3	Epidermal growth factor receptor kinase substrate 8-like protein 2 OS=Homo sapiens GN=EPS8L2 PE=1 SV=2 - [ES8L2_HUMAN]	13.29	1	5	5	18				2.52	1	1	7.55	3	4	13.29	5	7	4.76	2	2	12.45	4	4
Q8IX95	Putative cTAGE family member 3 OS=Homo sapiens GN=CTAGE3P PE=5 SV=1 - [CTGE3_HUMAN]	13.29	1	1	1	1													13.29	1	1
O00231	26S proteasome non-ATPase regulatory subunit 11 OS=Homo sapiens GN=PSMD11 PE=1 SV=3 - [PSD11_HUMAN]	13.27	1	5	5	22	9.95	3	4	7.11	2	4	10.43	3	4	9.95	4	7	5.21	2	2	2.37	1	1
Q96A33	Coiled-coil domain-containing protein 47 OS=Homo sapiens GN=CCDC47 PE=1 SV=1 - [CCD47_HUMAN]	13.25	1	4	4	35	10.97	3	4	8.28	3	4	13.25	4	7	13.25	4	9	9.94	3	7	8.28	3	4
Q92520	Protein FAM3C OS=Homo sapiens GN=FAM3C PE=1 SV=1 - [FAM3C_HUMAN]	13.22	1	2	2	4				7.93	1	1				13.22	2	3
P61160	Actin-related protein 2 OS=Homo sapiens GN=ACTR2 PE=1 SV=1 - [ARP2_HUMAN]	13.2	1	4	4	26	10.66	2	4	10.66	3	7	10.66	3	3	10.66	3	4	13.2	4	4	10.66	3	4
Q96EY5	Multivesicular body subunit 12A OS=Homo sapiens GN=MVB12A PE=1 SV=1 - [MB12A_HUMAN]	13.19	1	2	2	9	13.19	2	3				5.49	1	2	13.19	2	4
P41236	Protein phosphatase inhibitor 2 OS=Homo sapiens GN=PPP1R2 PE=1 SV=2 - [IPP2_HUMAN]	13.17	2	5	5	14	6.34	2	2	11.71	2	2	11.71	2	2	10.73	2	2	12.2	2	2	12.68	3	4
Q96HS1	Serine/threonine-protein phosphatase PGAM5, mitochondrial OS=Homo sapiens GN=PGAM5 PE=1 SV=2 - [PGAM5_HUMAN]	13.15	1	2	2	5	3.46	1	2				13.15	2	3
Q6FI81	Anamorsin OS=Homo sapiens GN=CIAPIN1 PE=1 SV=2 - [CPIN1_HUMAN]	13.14	1	3	3	17	9.62	2	3	13.14	3	3	4.17	1	1	13.14	3	4	4.17	1	2	9.62	2	4
Q8IWE2	Protein NOXP20 OS=Homo sapiens GN=FAM114A1 PE=1 SV=2 - [NXP20_HUMAN]	13.14	1	4	4	8	5.51	1	1				5.51	1	1	6.04	2	2	7.1	2	3	5.51	1	1
O15304	Apoptosis regulatory protein Siva OS=Homo sapiens GN=SIVA1 PE=1 SV=2 - [SIVA_HUMAN]	13.14	1	1	1	3				13.14	1	1	13.14	1	1				13.14	1	1
Q13601	KRR1 small subunit processome component homolog OS=Homo sapiens GN=KRR1 PE=1 SV=4 - [KRR1_HUMAN]	13.12	1	3	3	30	13.12	3	7	9.19	2	5	13.12	3	6	9.19	2	3	13.12	3	5	9.19	2	4
P13861	cAMP-dependent protein kinase type II-alpha regulatory subunit OS=Homo sapiens GN=PRKAR2A PE=1 SV=2 - [KAP2_HUMAN]	13.12	1	4	4	38	10.4	3	5	9.16	3	4	13.12	4	9	13.12	4	10	13.12	4	8	6.44	2	2
Q14444	Caprin-1 OS=Homo sapiens GN=CAPRIN1 PE=1 SV=2 - [CAPR1_HUMAN]	13.12	1	7	7	60	5.92	5	7	4.37	4	7	5.92	5	10	13.12	7	16	7.19	6	10	11.85	6	10
Q14318	Peptidyl-prolyl cis-trans isomerase FKBP8 OS=Homo sapiens GN=FKBP8 PE=1 SV=2 - [FKBP8_HUMAN]	13.11	1	3	3	6							9.22	2	3	10.92	2	2	2.18	1	1
Q9NX24	H/ACA ribonucleoprotein complex subunit 2 OS=Homo sapiens GN=NHP2 PE=1 SV=1 - [NHP2_HUMAN]	13.07	1	2	2	41	12.42	1	6	12.42	1	5	12.42	1	7	13.07	2	10	12.42	1	6	12.42	1	7
Q16763	Ubiquitin-conjugating enzyme E2 S OS=Homo sapiens GN=UBE2S PE=1 SV=2 - [UBE2S_HUMAN]	13.06	1	2	2	23	12.61	1	3	12.61	1	7	12.61	1	2	12.61	1	2	12.61	1	5	13.06	2	4
Q9NPD3	Exosome complex component RRP41 OS=Homo sapiens GN=EXOSC4 PE=1 SV=3 - [EXOS4_HUMAN]	13.06	1	2	2	12	6.12	1	2	13.06	2	2	6.12	1	2	13.06	2	3	6.12	1	1	13.06	2	2
P30042	ES1 protein homolog, mitochondrial OS=Homo sapiens GN=C21orf33 PE=1 SV=3 - [ES1_HUMAN]	13.06	1	3	3	4							9.33	1	1	13.06	2	2				10.07	1	1
Q5T6F2	Ubiquitin-associated protein 2 OS=Homo sapiens GN=UBAP2 PE=1 SV=1 - [UBAP2_HUMAN]	13.05	1	9	9	54	2.77	2	9	6.08	4	8	6.08	4	9	9.74	6	10	10.72	8	12	6.08	4	6
Q96BR5	Cytochrome c oxidase assembly factor 7 OS=Homo sapiens GN=COA7 PE=1 SV=2 - [COA7_HUMAN]	12.99	1	2	2	9	7.79	1	1	7.79	1	2	12.99	2	2	7.79	1	1	7.79	1	1	7.79	1	2
Q9Y3C7	Mediator of RNA polymerase II transcription subunit 31 OS=Homo sapiens GN=MED31 PE=1 SV=1 - [MED31_HUMAN]	12.98	1	1	1	7	12.98	1	1				12.98	1	1	12.98	1	1	12.98	1	2	12.98	1	2
Q9UNF0	Protein kinase C and casein kinase substrate in neurons protein 2 OS=Homo sapiens GN=PACSIN2 PE=1 SV=2 - [PACN2_HUMAN]	12.96	1	5	5	15	7	2	3	4.12	1	1	6.38	2	2	8.64	3	4	4.12	1	2	10.08	3	3
Q6UN15	Pre-mRNA 3'-end-processing factor FIP1 OS=Homo sapiens GN=FIP1L1 PE=1 SV=1 - [FIP1_HUMAN]	12.96	1	5	5	32	9.26	4	6	12.96	5	6	12.96	4	5	9.26	4	6	9.43	3	6	9.26	3	3
P31483	Nucleolysin TIA-1 isoform p40 OS=Homo sapiens GN=TIA1 PE=1 SV=3 - [TIA1_HUMAN]	12.95	1	2	4	26	12.95	3	5	12.95	3	4	12.95	4	6	12.95	3	5	7.51	2	4	9.59	2	2
Q96N06	Spermatogenesis-associated protein 33 OS=Homo sapiens GN=SPATA33 PE=2 SV=1 - [SPT33_HUMAN]	12.95	1	1	1	15	12.95	1	1	12.95	1	4	12.95	1	3	12.95	1	2	12.95	1	4	12.95	1	1
Q7Z4G1	COMM domain-containing protein 6 OS=Homo sapiens GN=COMMD6 PE=1 SV=1 - [COMD6_HUMAN]	12.94	1	1	1	1													12.94	1	1
Q9NYF8	Bcl-2-associated transcription factor 1 OS=Homo sapiens GN=BCLAF1 PE=1 SV=2 - [BCLF1_HUMAN]	12.93	1	12	12	77	10.65	7	8	8.15	5	8	10	6	19	10.54	9	17	11.09	7	14	11.09	7	11
O75414	Nucleoside diphosphate kinase 6 OS=Homo sapiens GN=NME6 PE=1 SV=3 - [NDK6_HUMAN]	12.9	1	1	1	7	12.9	1	1				12.9	1	2	12.9	1	3	12.9	1	1
P04264	Keratin, type II cytoskeletal 1 OS=Homo sapiens GN=KRT1 PE=1 SV=6 - [K2C1_HUMAN]	12.89	3	5	6	13				1.86	1	1				3.57	2	2	11.18	5	10
Q9Y3C0	WASH complex subunit CCDC53 OS=Homo sapiens GN=CCDC53 PE=1 SV=1 - [CCD53_HUMAN]	12.89	1	1	1	2							12.89	1	1	12.89	1	1
O95999	B-cell lymphoma/leukemia 10 OS=Homo sapiens GN=BCL10 PE=1 SV=1 - [BCL10_HUMAN]	12.88	1	2	2	7	7.3	1	1	5.58	1	1	7.3	1	1	7.3	1	1	7.3	1	2	7.3	1	1
Q5RKV6	Exosome complex component MTR3 OS=Homo sapiens GN=EXOSC6 PE=1 SV=1 - [EXOS6_HUMAN]	12.87	1	2	2	3	10.29	1	1				2.57	1	1				10.29	1	1
P36952	Serpin B5 OS=Homo sapiens GN=SERPINB5 PE=1 SV=2 - [SPB5_HUMAN]	12.8	1	3	3	3							12.8	3	3
O95336	6-phosphogluconolactonase OS=Homo sapiens GN=PGLS PE=1 SV=2 - [6PGL_HUMAN]	12.79	1	2	2	6	12.79	2	2	6.2	1	1	6.2	1	1	6.2	1	1	6.2	1	1
Q9NUG6	p53 and DNA damage-regulated protein 1 OS=Homo sapiens GN=PDRG1 PE=1 SV=2 - [PDRG1_HUMAN]	12.78	1	1	1	11	12.78	1	3	12.78	1	3				12.78	1	2	12.78	1	2	12.78	1	1
Q9BRL6	Serine/arginine-rich splicing factor 8 OS=Homo sapiens GN=SRSF8 PE=1 SV=1 - [SRSF8_HUMAN]	12.77	1	1	4	15	5.67	3	5	2.48	1	1	9.93	3	3	9.93	3	4				2.84	2	2
P54578	Ubiquitin carboxyl-terminal hydrolase 14 OS=Homo sapiens GN=USP14 PE=1 SV=3 - [UBP14_HUMAN]	12.75	1	5	5	14	5.06	2	4	2.83	1	2	5.26	2	2	5.06	2	2	2.23	1	1	7.49	3	3
O00139	Kinesin-like protein KIF2A OS=Homo sapiens GN=KIF2A PE=1 SV=3 - [KIF2A_HUMAN]	12.75	1	4	6	41	7.08	3	5	7.08	3	7	7.08	3	6	11.05	5	8	8.78	4	6	8.78	4	9
Q96T88	E3 ubiquitin-protein ligase UHRF1 OS=Homo sapiens GN=UHRF1 PE=1 SV=1 - [UHRF1_HUMAN]	12.74	1	7	7	34	7.31	3	6	6.56	3	6	7.31	3	3	9.08	5	7	9.08	5	7	4.67	2	5
Q9BSY4	Coiled-coil-helix-coiled-coil-helix domain-containing protein 5 OS=Homo sapiens GN=CHCHD5 PE=1 SV=1 - [CHCH5_HUMAN]	12.73	1	1	1	3										12.73	1	2	12.73	1	1
O43823	A-kinase anchor protein 8 OS=Homo sapiens GN=AKAP8 PE=1 SV=1 - [AKAP8_HUMAN]	12.72	1	4	4	65	7.08	2	12	7.08	2	8	10.98	3	13	8.82	3	11	10.98	3	8	10.98	3	13
Q9H2Z4	Homeobox protein Nkx-2.4 OS=Homo sapiens GN=NKX2-4 PE=2 SV=3 - [NKX24_HUMAN]	12.71	1	1	1	1													12.71	1	1
Q99757	Thioredoxin, mitochondrial OS=Homo sapiens GN=TXN2 PE=1 SV=2 - [THIOM_HUMAN]	12.65	1	2	2	5				7.83	1	2				7.83	1	1	4.82	1	1	7.83	1	1
Q14558	Phosphoribosyl pyrophosphate synthase-associated protein 1 OS=Homo sapiens GN=PRPSAP1 PE=1 SV=2 - [KPRA_HUMAN]	12.64	1	2	2	5				12.64	2	2	5.62	1	1	5.62	1	1	5.62	1	1
P16220	Cyclic AMP-responsive element-binding protein 1 OS=Homo sapiens GN=CREB1 PE=1 SV=2 - [CREB1_HUMAN]	12.61	1	2	2	4	12.61	2	2				8.5	1	1	8.5	1	1
Q9UJW0	Dynactin subunit 4 OS=Homo sapiens GN=DCTN4 PE=1 SV=1 - [DCTN4_HUMAN]	12.61	1	4	4	23	7.39	2	4	7.39	2	2	7.39	2	3	12.61	4	5	7.39	2	5	9.13	3	4
Q6IBS0	Twinfilin-2 OS=Homo sapiens GN=TWF2 PE=1 SV=2 - [TWF2_HUMAN]	12.61	1	3	4	27	6.02	2	6	2.58	1	1	12.61	4	7	10.32	3	6	10.32	3	4	6.02	2	3
Q10471	Polypeptide N-acetylgalactosaminyltransferase 2 OS=Homo sapiens GN=GALNT2 PE=1 SV=1 - [GALT2_HUMAN]	12.61	1	5	5	31	9.46	4	4	8.93	4	6	12.61	5	7	8.93	4	6	8.93	4	4	8.93	4	4
Q9Y2W1	Thyroid hormone receptor-associated protein 3 OS=Homo sapiens GN=THRAP3 PE=1 SV=2 - [TR150_HUMAN]	12.57	1	10	10	114	12.15	8	24	8.69	6	16	10.05	7	12	12.15	8	19	12.36	8	19	10.26	8	24
P35659	Protein DEK OS=Homo sapiens GN=DEK PE=1 SV=1 - [DEK_HUMAN]	12.53	1	4	4	24	6.67	3	4	5.33	2	2	5.33	2	4	12.53	4	7	5.33	2	2	6.67	3	5
P55081	Microfibrillar-associated protein 1 OS=Homo sapiens GN=MFAP1 PE=1 SV=2 - [MFAP1_HUMAN]	12.53	1	4	4	18	5.24	2	2	3.19	1	2	5.24	2	3	12.53	4	5	9.34	3	4	5.24	2	2
P53004	Biliverdin reductase A OS=Homo sapiens GN=BLVRA PE=1 SV=2 - [BIEA_HUMAN]	12.5	1	2	2	11	12.5	2	4	6.42	1	1	6.42	1	1				12.5	2	2	12.5	2	3
P46108	Adapter molecule crk OS=Homo sapiens GN=CRK PE=1 SV=2 - [CRK_HUMAN]	12.5	1	2	2	2	5.26	1	1							7.24	1	1
O43716	Glutamyl-tRNA(Gln) amidotransferase subunit C, mitochondrial OS=Homo sapiens GN=GATC PE=2 SV=1 - [GATC_HUMAN]	12.5	1	1	1	1										12.5	1	1
P78330	Phosphoserine phosphatase OS=Homo sapiens GN=PSPH PE=1 SV=2 - [SERB_HUMAN]	12.44	1	2	2	5	6.67	1	1				12.44	2	4
Q16540	39S ribosomal protein L23, mitochondrial OS=Homo sapiens GN=MRPL23 PE=1 SV=1 - [RM23_HUMAN]	12.42	1	1	1	14	12.42	1	4	12.42	1	2	12.42	1	2	12.42	1	2	12.42	1	2	12.42	1	2
Q96BJ3	Axin interactor, dorsalization-associated protein OS=Homo sapiens GN=AIDA PE=1 SV=1 - [AIDA_HUMAN]	12.42	1	2	2	2										5.23	1	1	7.19	1	1
Q9Y580	RNA-binding protein 7 OS=Homo sapiens GN=RBM7 PE=1 SV=1 - [RBM7_HUMAN]	12.41	1	3	3	18	12.41	3	3	12.41	3	4	8.65	2	4	5.26	1	2	9.02	2	2	12.41	3	3
Q08945	FACT complex subunit SSRP1 OS=Homo sapiens GN=SSRP1 PE=1 SV=1 - [SSRP1_HUMAN]	12.41	1	8	8	40	9.31	4	4	9.31	4	5	10.58	6	11	8.6	6	6	10.3	6	9	7.05	4	5
Q01433	AMP deaminase 2 OS=Homo sapiens GN=AMPD2 PE=1 SV=2 - [AMPD2_HUMAN]	12.4	1	8	8	50	9.56	5	7	11.04	6	9	10.92	7	12	7.39	5	7	11.04	6	8	9.56	5	7
Q9BRT6	Protein LLP homolog OS=Homo sapiens GN=LLPH PE=2 SV=1 - [LLPH_HUMAN]	12.4	1	1	1	6	12.4	1	1	12.4	1	1	12.4	1	1	12.4	1	1	12.4	1	1	12.4	1	1
Q9UQ35	Serine/arginine repetitive matrix protein 2 OS=Homo sapiens GN=SRRM2 PE=1 SV=2 - [SRRM2_HUMAN]	12.39	1	24	24	207	10.28	17	32	10.28	18	31	10.28	18	33	10.39	18	37	11.37	19	37	10.9	18	37
Q96AY3	Peptidyl-prolyl cis-trans isomerase FKBP10 OS=Homo sapiens GN=FKBP10 PE=1 SV=1 - [FKB10_HUMAN]	12.37	1	6	6	22	6.87	4	4	2.92	1	1	2.92	2	3	8.25	4	7	9.79	4	5	2.92	2	2
Q9BVC6	Transmembrane protein 109 OS=Homo sapiens GN=TMEM109 PE=1 SV=1 - [TM109_HUMAN]	12.35	1	3	3	5	3.29	1	1							3.29	1	1	12.35	3	3
O00161	Synaptosomal-associated protein 23 OS=Homo sapiens GN=SNAP23 PE=1 SV=1 - [SNP23_HUMAN]	12.32	1	2	2	31	12.32	2	7	12.32	2	5	12.32	2	5	12.32	2	5	12.32	2	4	12.32	2	5
P49914	5-formyltetrahydrofolate cyclo-ligase OS=Homo sapiens GN=MTHFS PE=1 SV=2 - [MTHFS_HUMAN]	12.32	1	2	2	6	6.9	1	1	5.42	1	3				6.9	1	1				5.42	1	1
Q9UKV3	Apoptotic chromatin condensation inducer in the nucleus OS=Homo sapiens GN=ACIN1 PE=1 SV=2 - [ACINU_HUMAN]	12.3	1	11	11	55	7.76	6	9	4.03	3	4	6.04	5	10	9.47	8	13	9.92	8	12	5.22	5	7
E9PQ53	NADH dehydrogenase [ubiquinone] 1 subunit C2, isoform 2 OS=Homo sapiens GN=NDUFC2-KCTD14 PE=1 SV=1 - [NDUCR_HUMAN]	12.28	2	1	1	9	12.28	1	1	12.28	1	2	12.28	1	1	12.28	1	1	12.28	1	3	12.28	1	1
Q16740	ATP-dependent Clp protease proteolytic subunit, mitochondrial OS=Homo sapiens GN=CLPP PE=1 SV=1 - [CLPP_HUMAN]	12.27	1	1	1	17	12.27	1	2	12.27	1	1	12.27	1	4	12.27	1	5	12.27	1	4	12.27	1	1
O75937	DnaJ homolog subfamily C member 8 OS=Homo sapiens GN=DNAJC8 PE=1 SV=2 - [DNJC8_HUMAN]	12.25	1	2	2	16	12.25	2	2	12.25	2	3	12.25	2	2	12.25	2	2	12.25	2	4	12.25	2	3
O60841	Eukaryotic translation initiation factor 5B OS=Homo sapiens GN=EIF5B PE=1 SV=4 - [IF2P_HUMAN]	12.21	1	9	9	33	6.97	4	7	6.72	4	4	2.87	2	5	8.28	5	9	8.77	6	6	3.61	2	2
Q9BVP2	Guanine nucleotide-binding protein-like 3 OS=Homo sapiens GN=GNL3 PE=1 SV=2 - [GNL3_HUMAN]	12.2	1	4	4	27	8.93	3	6	5.1	2	3	8.93	3	6	12.2	4	7	5.1	2	3	2	1	2
P55789	FAD-linked sulfhydryl oxidase ALR OS=Homo sapiens GN=GFER PE=1 SV=2 - [ALR_HUMAN]	12.2	1	1	1	2										12.2	1	2
Q9BW60	Elongation of very long chain fatty acids protein 1 OS=Homo sapiens GN=ELOVL1 PE=1 SV=1 - [ELOV1_HUMAN]	12.19	1	3	3	14	10.75	2	3	10.75	2	2	5.73	2	3	4.3	1	2	5.73	2	3	5.73	1	1
P29353	SHC-transforming protein 1 OS=Homo sapiens GN=SHC1 PE=1 SV=4 - [SHC1_HUMAN]	12.18	2	4	4	24	4.46	2	3	5.32	2	4	4.46	1	1	5.32	2	6	5.32	2	7	5.32	2	3
Q8NBT2	Kinetochore protein Spc24 OS=Homo sapiens GN=SPC24 PE=1 SV=2 - [SPC24_HUMAN]	12.18	1	2	2	9	12.18	2	2							12.18	2	2	12.18	2	3	12.18	2	2
Q86XP3	ATP-dependent RNA helicase DDX42 OS=Homo sapiens GN=DDX42 PE=1 SV=1 - [DDX42_HUMAN]	12.15	1	6	6	20	1.81	1	3				6.08	3	4	9.49	5	7	5.12	3	6
Q8TDD1	ATP-dependent RNA helicase DDX54 OS=Homo sapiens GN=DDX54 PE=1 SV=2 - [DDX54_HUMAN]	12.15	1	11	11	53	7.83	7	10	8.51	6	6	12.15	9	14	9.53	7	9	8.51	7	12	3.06	2	2
P17661	Desmin OS=Homo sapiens GN=DES PE=1 SV=3 - [DESM_HUMAN]	12.13	3	2	7	97	7.23	5	14	7.23	4	15	7.23	5	17	9.36	6	18	7.23	5	15	10	6	18
O75663	TIP41-like protein OS=Homo sapiens GN=TIPRL PE=1 SV=2 - [TIPRL_HUMAN]	12.13	1	2	2	14	6.62	1	1	6.62	1	3	6.62	1	2	12.13	2	2	12.13	2	3	12.13	2	3
O43290	U4/U6.U5 tri-snRNP-associated protein 1 OS=Homo sapiens GN=SART1 PE=1 SV=1 - [SNUT1_HUMAN]	12.13	1	9	9	38	6	4	5	6.88	4	4	6	4	5	10.5	6	9	10.75	6	10	8.25	4	5
Q9ULW3	Activator of basal transcription 1 OS=Homo sapiens GN=ABT1 PE=1 SV=1 - [ABT1_HUMAN]	12.13	1	2	2	11							12.13	2	3	12.13	2	4	12.13	2	3	7.35	1	1
Q7L014	Probable ATP-dependent RNA helicase DDX46 OS=Homo sapiens GN=DDX46 PE=1 SV=2 - [DDX46_HUMAN]	12.12	1	10	10	80	6.79	6	13	9.99	8	13	7.66	6	13	8.73	7	17	8.73	6	13	6.4	5	11
O00170	AH receptor-interacting protein OS=Homo sapiens GN=AIP PE=1 SV=2 - [AIP_HUMAN]	12.12	1	4	4	31	9.39	3	5	12.12	4	6	9.39	2	2	12.12	4	6	9.39	3	5	12.12	4	7
P01233	Choriogonadotropin subunit beta OS=Homo sapiens GN=CGB PE=1 SV=1 - [CGHB_HUMAN]	12.12	3	1	1	1				12.12	1	1
Q9GZX9	Twisted gastrulation protein homolog 1 OS=Homo sapiens GN=TWSG1 PE=2 SV=1 - [TWSG1_HUMAN]	12.11	1	2	2	2										12.11	2	2
P16615	Sarcoplasmic/endoplasmic reticulum calcium ATPase 2 OS=Homo sapiens GN=ATP2A2 PE=1 SV=1 - [AT2A2_HUMAN]	12.09	3	7	7	47	7.68	4	10	6.24	3	5	7.68	4	6	9.4	5	10	10.84	6	9	6.24	3	7
Q9BTD8	RNA-binding protein 42 OS=Homo sapiens GN=RBM42 PE=1 SV=1 - [RBM42_HUMAN]	12.08	1	5	5	20	3.54	1	2	7.08	2	3	6.04	2	2	8.13	3	5	8.54	3	4	9.58	3	4
P37198	Nuclear pore glycoprotein p62 OS=Homo sapiens GN=NUP62 PE=1 SV=3 - [NUP62_HUMAN]	12.07	1	3	3	21	6.32	2	3	6.32	2	3	12.07	3	5	6.32	2	4	6.32	2	3	6.32	2	3
Q8NE71	ATP-binding cassette sub-family F member 1 OS=Homo sapiens GN=ABCF1 PE=1 SV=2 - [ABCF1_HUMAN]	12.07	1	9	9	50	7.46	5	8	8.05	5	10	4.62	3	5	8.88	7	13	7.46	5	8	6.51	4	6
P01137	Transforming growth factor beta-1 OS=Homo sapiens GN=TGFB1 PE=1 SV=2 - [TGFB1_HUMAN]	12.05	1	3	4	10	7.44	3	4	4.87	2	2	3.33	1	1	2.82	1	1	7.44	2	2
Q16186	Proteasomal ubiquitin receptor ADRM1 OS=Homo sapiens GN=ADRM1 PE=1 SV=2 - [ADRM1_HUMAN]	12.04	1	4	4	28	7.37	3	5	6.63	2	4	11.3	3	5	11.3	3	6	6.63	2	4	6.63	2	4
P21283	V-type proton ATPase subunit C 1 OS=Homo sapiens GN=ATP6V1C1 PE=1 SV=4 - [VATC1_HUMAN]	12.04	1	4	4	18	5.5	2	3	5.5	2	3	12.04	4	5	5.5	2	2	7.85	3	3	5.5	2	2
Q9NYP9	Protein Mis18-alpha OS=Homo sapiens GN=MIS18A PE=1 SV=1 - [MS18A_HUMAN]	12.02	1	2	2	2										6.44	1	1	5.58	1	1
Q5JTJ3	Cytochrome c oxidase assembly factor 6 homolog OS=Homo sapiens GN=COA6 PE=1 SV=1 - [COA6_HUMAN]	12	1	1	1	1										12	1	1
Q04206	Transcription factor p65 OS=Homo sapiens GN=RELA PE=1 SV=2 - [TF65_HUMAN]	11.98	1	3	3	8	5.44	1	1				5.44	1	2	11.98	3	3	5.44	1	1	4.54	1	1
Q14151	Scaffold attachment factor B2 OS=Homo sapiens GN=SAFB2 PE=1 SV=1 - [SAFB2_HUMAN]	11.96	1	6	12	85	9.97	9	15	8.29	7	10	11.54	10	17	10.39	11	12	11.54	10	16	9.97	9	15
Q9UNP9	Peptidyl-prolyl cis-trans isomerase E OS=Homo sapiens GN=PPIE PE=1 SV=1 - [PPIE_HUMAN]	11.96	1	4	4	14	3.99	1	1	11.96	3	3	9.97	3	4	3.99	1	1	9.97	3	4	3.99	1	1
Q7Z406	Myosin-14 OS=Homo sapiens GN=MYH14 PE=1 SV=2 - [MYH14_HUMAN]	11.93	9	10	21	91	4.56	10	13	4.56	9	10	5.91	11	14	7.32	12	25	6.72	13	15	7.37	12	14
P78344	Eukaryotic translation initiation factor 4 gamma 2 OS=Homo sapiens GN=EIF4G2 PE=1 SV=1 - [IF4G2_HUMAN]	11.91	1	9	9	80	11.91	9	13	10.25	8	9	10.92	8	16	9.26	7	11	9.26	8	20	9.26	7	11
Q13428	Treacle protein OS=Homo sapiens GN=TCOF1 PE=1 SV=3 - [TCOF_HUMAN]	11.9	1	11	11	127	7.53	7	18	7.59	7	18	10.55	9	27	10.35	9	26	11.29	10	17	9.74	8	21
Q8NBJ5	Procollagen galactosyltransferase 1 OS=Homo sapiens GN=COLGALT1 PE=1 SV=1 - [GT251_HUMAN]	11.9	1	6	6	45	7.23	4	7	7.23	4	6	9	5	12	9	5	10	10.13	5	5	7.23	4	5
P20155	Serine protease inhibitor Kazal-type 2 OS=Homo sapiens GN=SPINK2 PE=1 SV=2 - [ISK2_HUMAN]	11.9	1	1	1	1										11.9	1	1
Q9P2B4	CTTNBP2 N-terminal-like protein OS=Homo sapiens GN=CTTNBP2NL PE=1 SV=2 - [CT2NL_HUMAN]	11.89	1	5	5	30	10.17	4	6	5.16	2	2	8.29	3	5	7.98	3	4	11.89	5	9	6.26	2	4
Q96D15	Reticulocalbin-3 OS=Homo sapiens GN=RCN3 PE=1 SV=1 - [RCN3_HUMAN]	11.89	1	4	4	23	7.93	3	5	7.93	3	4	11.89	4	5	7.93	3	4	7.01	2	2	7.01	2	3
Q99700	Ataxin-2 OS=Homo sapiens GN=ATXN2 PE=1 SV=2 - [ATX2_HUMAN]	11.88	1	10	10	50	7.01	5	14	4.04	4	5	8.83	7	10	8.45	6	7	5.41	4	6	6.85	5	8
Q32MZ4	Leucine-rich repeat flightless-interacting protein 1 OS=Homo sapiens GN=LRRFIP1 PE=1 SV=2 - [LRRF1_HUMAN]	11.88	1	6	6	51	6.44	3	8	6.44	3	8	7.92	4	7	8.42	4	9	8.42	4	10	8.42	4	9
Q66PJ3	ADP-ribosylation factor-like protein 6-interacting protein 4 OS=Homo sapiens GN=ARL6IP4 PE=1 SV=2 - [AR6P4_HUMAN]	11.88	1	3	3	16	8.31	2	3	4.04	1	1	7.6	2	2	8.31	2	5	11.88	3	4	4.04	1	1
Q5RI15	Cytochrome c oxidase protein 20 homolog OS=Homo sapiens GN=COX20 PE=1 SV=2 - [COX20_HUMAN]	11.86	1	1	1	2										11.86	1	1	11.86	1	1
Q14247	Src substrate cortactin OS=Homo sapiens GN=CTTN PE=1 SV=2 - [SRC8_HUMAN]	11.82	1	6	6	48	9.09	4	9	9.09	4	10	9.09	4	7	9.09	5	8	9.09	4	8	11.82	5	6
Q8IZP0	Abl interactor 1 OS=Homo sapiens GN=ABI1 PE=1 SV=4 - [ABI1_HUMAN]	11.81	1	2	5	14	5.51	2	2	2.17	1	2	2.17	1	1	8.46	4	4	8.27	3	4	2.17	1	1
O75146	Huntingtin-interacting protein 1-related protein OS=Homo sapiens GN=HIP1R PE=1 SV=2 - [HIP1R_HUMAN]	11.8	1	9	9	44	5.15	3	5	6.18	6	9	7.96	5	10	9.36	6	8	8.33	5	7	5.52	4	5
Q14974	Importin subunit beta-1 OS=Homo sapiens GN=KPNB1 PE=1 SV=2 - [IMB1_HUMAN]	11.76	1	14	14	153	11.53	13	29	11.53	12	18	11.53	13	29	11.53	13	24	10.84	12	26	11.53	11	27
O95295	SNARE-associated protein Snapin OS=Homo sapiens GN=SNAPIN PE=1 SV=1 - [SNAPN_HUMAN]	11.76	1	2	2	16	10.29	1	2	11.76	2	5	11.76	2	2	11.76	2	2	11.76	2	3	11.76	2	2
Q6I9Y2	THO complex subunit 7 homolog OS=Homo sapiens GN=THOC7 PE=1 SV=3 - [THOC7_HUMAN]	11.76	1	2	2	2										11.76	2	2
P13797	Plastin-3 OS=Homo sapiens GN=PLS3 PE=1 SV=4 - [PLST_HUMAN]	11.75	1	3	5	47	6.19	3	8	6.19	3	10	10.32	4	10	6.19	3	6	6.19	3	6	5.71	3	7
O43852	Calumenin OS=Homo sapiens GN=CALU PE=1 SV=2 - [CALU_HUMAN]	11.75	1	3	3	22	6.67	2	2	11.75	3	4	11.75	3	5	11.75	3	5	6.67	2	3	4.13	1	3
Q9NY27	Serine/threonine-protein phosphatase 4 regulatory subunit 2 OS=Homo sapiens GN=PPP4R2 PE=1 SV=3 - [PP4R2_HUMAN]	11.75	1	3	3	10	4.32	1	1	4.32	1	1	4.32	1	2	11.75	3	3	4.32	1	1	8.15	2	2
Q92890	Ubiquitin fusion degradation protein 1 homolog OS=Homo sapiens GN=UFD1L PE=1 SV=3 - [UFD1_HUMAN]	11.73	1	4	4	12	5.21	1	2	5.21	1	2	7.49	2	3	6.51	2	2	3.91	1	1	5.21	1	2
Q9NP79	Vacuolar protein sorting-associated protein VTA1 homolog OS=Homo sapiens GN=VTA1 PE=1 SV=1 - [VTA1_HUMAN]	11.73	1	3	3	28	9.77	2	5	11.73	3	5	9.77	2	4	11.73	3	5	11.73	3	5	9.77	2	4
Q06124	Tyrosine-protein phosphatase non-receptor type 11 OS=Homo sapiens GN=PTPN11 PE=1 SV=2 - [PTN11_HUMAN]	11.73	1	5	5	36	6.87	3	4	6.87	3	9	9.38	4	8	11.73	5	6	6.87	3	5	6.87	3	4
Q00403	Transcription initiation factor IIB OS=Homo sapiens GN=GTF2B PE=1 SV=1 - [TF2B_HUMAN]	11.71	1	2	2	10	11.71	2	2	6.65	1	2	6.65	1	1	6.65	1	1	11.71	2	2	11.71	2	2
O14908	PDZ domain-containing protein GIPC1 OS=Homo sapiens GN=GIPC1 PE=1 SV=2 - [GIPC1_HUMAN]	11.71	1	3	3	18	8.71	2	2	2.7	1	1	11.71	3	5	11.71	3	4	8.71	2	3	8.71	2	3
P26006	Integrin alpha-3 OS=Homo sapiens GN=ITGA3 PE=1 SV=5 - [ITA3_HUMAN]	11.7	1	11	11	88	10.56	8	13	8.75	7	12	11.7	10	15	10.85	10	19	11.7	10	13	10.56	8	16
Q9NYB9	Abl interactor 2 OS=Homo sapiens GN=ABI2 PE=1 SV=1 - [ABI2_HUMAN]	11.7	1	2	5	17	5.46	2	2	2.14	1	1	5.46	2	3	11.7	5	6	8.19	3	3	5.46	2	2
P56134	ATP synthase subunit f, mitochondrial OS=Homo sapiens GN=ATP5J2 PE=1 SV=3 - [ATPK_HUMAN]	11.7	1	1	1	1																11.7	1	1
Q9Y3E2	BolA-like protein 1 OS=Homo sapiens GN=BOLA1 PE=1 SV=1 - [BOLA1_HUMAN]	11.68	1	1	1	1	11.68	1	1
P18085	ADP-ribosylation factor 4 OS=Homo sapiens GN=ARF4 PE=1 SV=3 - [ARF4_HUMAN]	11.67	4	1	1	1							11.67	1	1
P02768	Serum albumin OS=Homo sapiens GN=ALB PE=1 SV=2 - [ALBU_HUMAN]	11.66	1	9	9	112	7.72	4	18	7.72	5	19	5.25	4	15	11.66	8	26	9.2	5	19	6.57	4	15
Q6UB35	Monofunctional C1-tetrahydrofolate synthase, mitochondrial OS=Homo sapiens GN=MTHFD1L PE=1 SV=1 - [C1TM_HUMAN]	11.66	1	7	9	48	2.86	2	3	5.93	5	8	11.35	7	15	5.73	4	9	6.54	4	6	7.67	6	7
P08397	Porphobilinogen deaminase OS=Homo sapiens GN=HMBS PE=1 SV=2 - [HEM3_HUMAN]	11.63	1	2	2	4	4.99	1	1				6.65	1	2	4.99	1	1
P09960	Leukotriene A-4 hydrolase OS=Homo sapiens GN=LTA4H PE=1 SV=2 - [LKHA4_HUMAN]	11.62	1	5	5	46	5.89	2	7	5.89	2	3	7.86	3	8	8.67	4	15	5.89	2	4	9	4	9
Q9BVG4	Protein PBDC1 OS=Homo sapiens GN=PBDC1 PE=1 SV=1 - [PBDC1_HUMAN]	11.59	1	2	2	23	11.59	2	5	11.59	2	4	11.59	2	4	11.59	2	5	11.59	2	3	11.59	2	2
O75150	E3 ubiquitin-protein ligase BRE1B OS=Homo sapiens GN=RNF40 PE=1 SV=4 - [BRE1B_HUMAN]	11.59	1	8	8	11	2.5	2	2				1.1	1	1	4.5	3	3	2.7	2	3	4.6	2	2
P51610	Host cell factor 1 OS=Homo sapiens GN=HCFC1 PE=1 SV=2 - [HCFC1_HUMAN]	11.55	2	15	15	71	3.83	6	10	5.55	7	9	7.37	9	12	8.45	11	18	4.08	6	11	5.85	8	11
P46734	Dual specificity mitogen-activated protein kinase kinase 3 OS=Homo sapiens GN=MAP2K3 PE=1 SV=2 - [MP2K3_HUMAN]	11.53	1	4	4	32	8.65	2	5	5.19	2	4	5.19	1	5	8.07	3	7	5.19	2	6	8.07	3	5
Q14137	Ribosome biogenesis protein BOP1 OS=Homo sapiens GN=BOP1 PE=1 SV=2 - [BOP1_HUMAN]	11.53	1	8	8	22	3.22	2	2	2.68	2	4	10.05	6	8	3.22	3	3	5.9	4	4	1.88	1	1
O95639	Cleavage and polyadenylation specificity factor subunit 4 OS=Homo sapiens GN=CPSF4 PE=1 SV=1 - [CPSF4_HUMAN]	11.52	1	1	1	4	11.52	1	1	11.52	1	1	11.52	1	1							11.52	1	1
P07858	Cathepsin B OS=Homo sapiens GN=CTSB PE=1 SV=3 - [CATB_HUMAN]	11.5	1	4	4	14	7.67	2	2	11.5	3	3	7.67	2	3	9.14	2	2	5.31	1	1	11.5	3	3
P35270	Sepiapterin reductase OS=Homo sapiens GN=SPR PE=1 SV=1 - [SPRE_HUMAN]	11.49	1	2	2	6	6.9	1	2				6.9	1	2	11.49	2	2
Q6DD87	Zinc finger protein 787 OS=Homo sapiens GN=ZNF787 PE=1 SV=3 - [ZN787_HUMAN]	11.49	1	3	3	10				3.13	1	1	7.31	2	3	7.31	2	3	4.18	1	1	3.13	1	2
Q9H223	EH domain-containing protein 4 OS=Homo sapiens GN=EHD4 PE=1 SV=1 - [EHD4_HUMAN]	11.46	2	4	4	12	2.77	1	1	2.77	1	1	2.77	1	1	11.46	4	6	6.28	2	2	2.77	1	1
P27708	CAD protein OS=Homo sapiens GN=CAD PE=1 SV=3 - [PYR1_HUMAN]	11.46	1	13	13	79	5.26	6	12	5.66	7	13	10.11	10	12	8.9	10	16	6.07	7	13	5.26	6	13
O43143	Putative pre-mRNA-splicing factor ATP-dependent RNA helicase DHX15 OS=Homo sapiens GN=DHX15 PE=1 SV=2 - [DHX15_HUMAN]	11.45	1	6	6	29	11.45	6	9	3.14	2	3	9.43	5	7	3.14	2	3	5.16	3	3	4.78	3	4
P33992	DNA replication licensing factor MCM5 OS=Homo sapiens GN=MCM5 PE=1 SV=5 - [MCM5_HUMAN]	11.44	1	4	4	23	7.49	3	5	7.49	3	4	9.4	3	3	4.5	2	3	7.49	3	5	2.45	1	3
O94992	Protein HEXIM1 OS=Homo sapiens GN=HEXIM1 PE=1 SV=1 - [HEXI1_HUMAN]	11.42	1	3	3	15	4.46	1	1	7.8	2	2	3.62	1	1	3.34	1	2	11.42	3	6	7.8	2	3
P54687	Branched-chain-amino-acid aminotransferase, cytosolic OS=Homo sapiens GN=BCAT1 PE=1 SV=3 - [BCAT1_HUMAN]	11.4	1	3	3	9	4.4	1	2				4.4	1	1	4.4	1	1	6.99	2	2	8.81	2	3
Q9NUL3	Double-stranded RNA-binding protein Staufen homolog 2 OS=Homo sapiens GN=STAU2 PE=1 SV=1 - [STAU2_HUMAN]	11.4	1	4	4	19	7.19	3	3	3.16	2	4	3.16	2	3	7.37	3	4	3.16	1	1	3.16	2	4
Q0VDF9	Heat shock 70 kDa protein 14 OS=Homo sapiens GN=HSPA14 PE=1 SV=1 - [HSP7E_HUMAN]	11.39	1	3	3	28	9.04	2	5	9.04	2	4	11.39	3	5	9.04	2	7	9.04	2	4	9.04	2	3
Q99470	Stromal cell-derived factor 2 OS=Homo sapiens GN=SDF2 PE=1 SV=2 - [SDF2_HUMAN]	11.37	1	1	1	24	11.37	1	2	11.37	1	6	11.37	1	2	11.37	1	3	11.37	1	6	11.37	1	5
Q9NTM9	Copper homeostasis protein cutC homolog OS=Homo sapiens GN=CUTC PE=1 SV=1 - [CUTC_HUMAN]	11.36	1	2	2	2	5.86	1	1										5.49	1	1
Q9NU23	LYR motif-containing protein 2 OS=Homo sapiens GN=LYRM2 PE=1 SV=1 - [LYRM2_HUMAN]	11.36	1	1	1	1	11.36	1	1
Q16775	Hydroxyacylglutathione hydrolase, mitochondrial OS=Homo sapiens GN=HAGH PE=1 SV=2 - [GLO2_HUMAN]	11.36	1	2	2	3							7.47	1	1	3.9	1	2
Q9P2K5	Myelin expression factor 2 OS=Homo sapiens GN=MYEF2 PE=1 SV=3 - [MYEF2_HUMAN]	11.33	1	4	8	27	4.17	4	5	5.83	3	4	6.83	4	5	9.33	6	9	1.83	1	2	3.83	2	2
Q9Y291	28S ribosomal protein S33, mitochondrial OS=Homo sapiens GN=MRPS33 PE=1 SV=1 - [RT33_HUMAN]	11.32	1	1	1	2										11.32	1	2
Q8NFU3	Thiosulfate sulfurtransferase/rhodanese-like domain-containing protein 1 OS=Homo sapiens GN=TSTD1 PE=1 SV=3 - [TSTD1_HUMAN]	11.3	1	1	1	1																11.3	1	1
P49711	Transcriptional repressor CTCF OS=Homo sapiens GN=CTCF PE=1 SV=1 - [CTCF_HUMAN]	11.28	2	7	7	25	4.54	3	3	2.34	2	3	4.26	3	3	11.28	7	10	6.6	4	5	2.06	1	1
Q8WWM7	Ataxin-2-like protein OS=Homo sapiens GN=ATXN2L PE=1 SV=2 - [ATX2L_HUMAN]	11.26	1	8	8	38	7.63	4	9	5.3	3	5	6.33	5	6	11.26	7	8	6.6	4	5	7.63	4	5
Q6S8J3	POTE ankyrin domain family member E OS=Homo sapiens GN=POTEE PE=1 SV=3 - [POTEE_HUMAN]	11.26	5	1	15	341	10.88	14	52	9.12	11	48	9.12	14	64	9.12	13	69	8.56	10	48	9.12	12	60
O94763	Unconventional prefoldin RPB5 interactor 1 OS=Homo sapiens GN=URI1 PE=1 SV=3 - [RMP_HUMAN]	11.21	1	3	3	17	8.79	2	2	2.8	1	1	8.79	2	2	11.21	3	5	2.8	1	2	5.23	2	5
Q9BVC5	Ashwin OS=Homo sapiens GN=C2orf49 PE=1 SV=1 - [ASHWN_HUMAN]	11.21	1	1	1	4							11.21	1	1	11.21	1	1	11.21	1	2
Q9HAV0	Guanine nucleotide-binding protein subunit beta-4 OS=Homo sapiens GN=GNB4 PE=1 SV=3 - [GBB4_HUMAN]	11.18	1	1	3	18	4.71	2	3	3.82	1	3	4.71	2	3	3.82	1	1	10.29	2	3	4.71	2	5
Q8TAT6	Nuclear protein localization protein 4 homolog OS=Homo sapiens GN=NPLOC4 PE=1 SV=3 - [NPL4_HUMAN]	11.18	1	7	7	35	4.61	2	2	5.92	3	5	5.92	3	4	11.02	6	10	11.18	6	8	5.92	3	6
P61088	Ubiquitin-conjugating enzyme E2 N OS=Homo sapiens GN=UBE2N PE=1 SV=1 - [UBE2N_HUMAN]	11.18	1	1	1	7	11.18	1	2				11.18	1	4	11.18	1	1
Q7Z4V5	Hepatoma-derived growth factor-related protein 2 OS=Homo sapiens GN=HDGFRP2 PE=1 SV=1 - [HDGR2_HUMAN]	11.18	1	8	8	41	4.47	4	4	6.86	4	10	4.47	4	6	8.35	6	7	7.3	5	7	8.35	5	7
Q99829	Copine-1 OS=Homo sapiens GN=CPNE1 PE=1 SV=1 - [CPNE1_HUMAN]	11.17	1	3	3	17	6.89	2	4	3.17	1	1	6.89	2	4	11.17	3	3	6.89	2	2	6.89	2	3
Q16774	Guanylate kinase OS=Homo sapiens GN=GUK1 PE=1 SV=2 - [KGUA_HUMAN]	11.17	1	2	2	11	11.17	2	4	5.58	1	1	5.58	1	1	5.58	1	1	5.58	1	2	5.58	1	2
Q15642	Cdc42-interacting protein 4 OS=Homo sapiens GN=TRIP10 PE=1 SV=3 - [CIP4_HUMAN]	11.15	1	4	4	21	8.32	3	4	4.83	2	2	8.32	3	5	7.65	3	5	4.83	2	3	4.83	2	2
Q8N3F8	MICAL-like protein 1 OS=Homo sapiens GN=MICALL1 PE=1 SV=2 - [MILK1_HUMAN]	11.12	1	5	5	24	1.62	1	1	7.18	3	5	5.91	3	5	6.14	3	4	9.04	4	7	4.06	2	2
Q86Y37	CDK2-associated and cullin domain-containing protein 1 OS=Homo sapiens GN=CACUL1 PE=1 SV=1 - [CACL1_HUMAN]	11.11	1	2	2	3	6.5	1	1				6.5	1	1				4.61	1	1
Q9BYD6	39S ribosomal protein L1, mitochondrial OS=Homo sapiens GN=MRPL1 PE=1 SV=2 - [RM01_HUMAN]	11.08	1	2	2	20	11.08	2	3	3.69	1	2	11.08	2	3	11.08	2	5	11.08	2	6	3.69	1	1
Q9NY61	Protein AATF OS=Homo sapiens GN=AATF PE=1 SV=1 - [AATF_HUMAN]	11.07	1	4	4	14	2.68	1	2	2.68	1	1	5	2	2	8.21	3	4	8.75	3	3	5	2	2
Q9Y3A4	Ribosomal RNA-processing protein 7 homolog A OS=Homo sapiens GN=RRP7A PE=1 SV=2 - [RRP7A_HUMAN]	11.07	2	2	2	13	6.43	1	1	6.43	1	3	6.43	1	3	6.43	1	1	11.07	2	3	6.43	1	2
Q5SZD1	Uncharacterized protein C6orf141 OS=Homo sapiens GN=C6orf141 PE=2 SV=3 - [CF141_HUMAN]	11.07	1	1	1	2	11.07	1	1										11.07	1	1
Q16576	Histone-binding protein RBBP7 OS=Homo sapiens GN=RBBP7 PE=1 SV=1 - [RBBP7_HUMAN]	11.06	1	1	3	40	11.06	3	8	11.06	3	6	11.06	3	7	11.06	3	4	11.06	3	8	11.06	3	7
P78386	Keratin, type II cuticular Hb5 OS=Homo sapiens GN=KRT85 PE=1 SV=1 - [KRT85_HUMAN]	11.05	1	1	5	27	5.72	3	3	7.69	3	4	5.72	3	5	4.34	2	5	7.69	4	5	5.33	3	5
Q14257	Reticulocalbin-2 OS=Homo sapiens GN=RCN2 PE=1 SV=1 - [RCN2_HUMAN]	11.04	1	2	2	11	3.79	1	2	3.79	1	2	11.04	2	3	3.79	1	2	3.79	1	1	3.79	1	1
Q96EY1	DnaJ homolog subfamily A member 3, mitochondrial OS=Homo sapiens GN=DNAJA3 PE=1 SV=2 - [DNJA3_HUMAN]	11.04	1	3	3	21	8.13	2	3	8.13	2	2	7.71	2	2	11.04	3	7	8.13	2	4	8.13	2	3
Q9GZS1	DNA-directed RNA polymerase I subunit RPA49 OS=Homo sapiens GN=POLR1E PE=1 SV=2 - [RPA49_HUMAN]	11.02	1	3	3	13	5.82	1	1				5.82	1	1	2.7	1	5	2.7	1	4	5.2	2	2
O15144	Actin-related protein 2/3 complex subunit 2 OS=Homo sapiens GN=ARPC2 PE=1 SV=1 - [ARPC2_HUMAN]	11	1	4	4	25	11	4	4	7.33	3	5	7.33	3	5	7.33	3	5	7.33	3	3	7.33	2	3
Q8TEA8	D-tyrosyl-tRNA(Tyr) deacylase 1 OS=Homo sapiens GN=DTD1 PE=1 SV=2 - [DTD1_HUMAN]	11	1	2	2	13	7.66	1	1	7.66	1	3	11	2	2	7.66	1	2	7.66	1	2	7.66	1	3
P49748	Very long-chain specific acyl-CoA dehydrogenase, mitochondrial OS=Homo sapiens GN=ACADVL PE=1 SV=1 - [ACADV_HUMAN]	10.99	1	4	4	20	6.26	2	2	5.34	2	3	9.16	3	4	10.99	4	6	6.26	2	3	6.26	2	2
P38936	Cyclin-dependent kinase inhibitor 1 OS=Homo sapiens GN=CDKN1A PE=1 SV=3 - [CDN1A_HUMAN]	10.98	1	1	1	2	10.98	1	1							10.98	1	1
P49841	Glycogen synthase kinase-3 beta OS=Homo sapiens GN=GSK3B PE=1 SV=2 - [GSK3B_HUMAN]	10.95	1	2	2	21	10.95	2	7	10.95	2	4	10.95	2	4	8.81	1	3	8.81	1	1	8.81	1	2
Q96FZ7	Charged multivesicular body protein 6 OS=Homo sapiens GN=CHMP6 PE=1 SV=3 - [CHMP6_HUMAN]	10.95	1	2	2	4	6.47	1	1				6.47	1	1				4.48	1	1	4.48	1	1
Q969G3	SWI/SNF-related matrix-associated actin-dependent regulator of chromatin subfamily E member 1 OS=Homo sapiens GN=SMARCE1 PE=1 SV=2 - [SMCE1_HUMAN]	10.95	1	4	4	37	10.95	4	6	9.49	3	5	9.49	3	8	9.49	3	8	9.49	3	5	9.49	3	5
O43776	Asparagine--tRNA ligase, cytoplasmic OS=Homo sapiens GN=NARS PE=1 SV=1 - [SYNC_HUMAN]	10.95	1	3	3	9	2.37	1	1	2.37	1	1	7.3	2	2	6.02	2	3	2.37	1	1	2.37	1	1
Q9NUQ6	SPATS2-like protein OS=Homo sapiens GN=SPATS2L PE=1 SV=2 - [SPS2L_HUMAN]	10.93	1	4	4	6	1.97	1	1	1.97	1	1	1.97	1	1	8.96	3	3
O14776	Transcription elongation regulator 1 OS=Homo sapiens GN=TCERG1 PE=1 SV=2 - [TCRG1_HUMAN]	10.93	1	11	11	43	4.64	6	7	5.1	6	8	7.47	7	8	4.55	5	6	6.65	7	7	6.01	7	7
Q14160	Protein scribble homolog OS=Homo sapiens GN=SCRIB PE=1 SV=4 - [SCRIB_HUMAN]	10.92	1	8	8	38	4.85	3	7	4.85	3	4	6.81	5	7	10.31	7	11	4.72	4	5	4.85	3	4
Q9UNN8	Endothelial protein C receptor OS=Homo sapiens GN=PROCR PE=1 SV=1 - [EPCR_HUMAN]	10.92	1	2	2	12				7.14	1	2	10.92	2	4	7.14	1	1	7.14	1	3	7.14	1	2
P68402	Platelet-activating factor acetylhydrolase IB subunit beta OS=Homo sapiens GN=PAFAH1B2 PE=1 SV=1 - [PA1B2_HUMAN]	10.92	1	1	1	7				10.92	1	1	10.92	1	1	10.92	1	2	10.92	1	1	10.92	1	2
Q9GZN8	UPF0687 protein C20orf27 OS=Homo sapiens GN=C20orf27 PE=1 SV=3 - [CT027_HUMAN]	10.92	1	1	1	5										10.92	1	3	10.92	1	1	10.92	1	1
Q15758	Neutral amino acid transporter B(0) OS=Homo sapiens GN=SLC1A5 PE=1 SV=2 - [AAAT_HUMAN]	10.91	1	5	5	33	10.91	4	8	7.21	2	4	9.06	3	3	9.06	3	4	9.06	3	7	9.06	3	7
Q9Y678	Coatomer subunit gamma-1 OS=Homo sapiens GN=COPG1 PE=1 SV=1 - [COPG1_HUMAN]	10.87	1	6	6	43	4	2	3	4	2	3	8.81	4	11	7.21	4	12	7.78	4	9	1.95	1	5
Q96EQ0	Small glutamine-rich tetratricopeptide repeat-containing protein beta OS=Homo sapiens GN=SGTB PE=1 SV=1 - [SGTB_HUMAN]	10.86	1	2	2	15	6.58	1	1				4.28	1	2	10.86	2	4	10.86	2	5	10.86	2	3
P54920	Alpha-soluble NSF attachment protein OS=Homo sapiens GN=NAPA PE=1 SV=3 - [SNAA_HUMAN]	10.85	1	3	3	14	10.85	2	3	10.85	2	2	10.85	2	2	10.85	3	5				10.85	2	2
Q9NQW6	Actin-binding protein anillin OS=Homo sapiens GN=ANLN PE=1 SV=2 - [ANLN_HUMAN]	10.85	1	9	9	44	3.91	4	5	6.76	6	9	6.05	5	5	10.14	8	9	5.87	4	9	6.05	5	7
Q9Y2R4	Probable ATP-dependent RNA helicase DDX52 OS=Homo sapiens GN=DDX52 PE=1 SV=3 - [DDX52_HUMAN]	10.85	1	5	5	21	10.85	5	6	3.67	2	4	3.67	1	1	3.67	2	7	1.34	1	1	5.68	2	2
P18583	Protein SON OS=Homo sapiens GN=SON PE=1 SV=4 - [SON_HUMAN]	10.84	1	16	16	64	6.76	9	12	3.46	6	6	5.11	7	9	7.79	11	15	5.15	8	11	3.67	6	11
Q9NP77	RNA polymerase II subunit A C-terminal domain phosphatase SSU72 OS=Homo sapiens GN=SSU72 PE=1 SV=1 - [SSU72_HUMAN]	10.82	1	2	2	15	10.82	2	2	10.82	2	2	5.15	1	1	10.82	2	5	10.82	2	3	5.15	1	2
Q9Y5Q8	General transcription factor 3C polypeptide 5 OS=Homo sapiens GN=GTF3C5 PE=1 SV=2 - [TF3C5_HUMAN]	10.79	1	5	5	22	8.29	3	5	3.08	1	1	8.09	3	5	10.6	4	4	8.29	3	3	8.29	3	4
P46379	Large proline-rich protein BAG6 OS=Homo sapiens GN=BAG6 PE=1 SV=2 - [BAG6_HUMAN]	10.78	1	7	7	54	8.22	5	8	8.75	6	10	10.25	6	11	8.75	5	9	10.25	6	11	6.71	4	5
P55265	Double-stranded RNA-specific adenosine deaminase OS=Homo sapiens GN=ADAR PE=1 SV=4 - [DSRAD_HUMAN]	10.77	1	10	10	54	6.12	5	9	5.22	4	5	7.26	5	10	7.59	6	10	5.71	5	8	9.3	8	12
P08047	Transcription factor Sp1 OS=Homo sapiens GN=SP1 PE=1 SV=3 - [SP1_HUMAN]	10.7	7	4	4	11	1.15	1	1	1.15	1	1	4.2	2	2	5.1	2	4	3.69	2	2	1.15	1	1
Q96FQ6	Protein S100-A16 OS=Homo sapiens GN=S100A16 PE=1 SV=1 - [S10AG_HUMAN]	10.68	1	1	1	3										10.68	1	1	10.68	1	1	10.68	1	1
P63092	Guanine nucleotide-binding protein G(s) subunit alpha isoforms short OS=Homo sapiens GN=GNAS PE=1 SV=1 - [GNAS2_HUMAN]	10.66	5	4	6	29	7.61	4	5	7.87	2	2	10.66	5	6	10.66	5	7	10.66	5	5	10.66	4	4
P13798	Acylamino-acid-releasing enzyme OS=Homo sapiens GN=APEH PE=1 SV=4 - [ACPH_HUMAN]	10.66	1	6	6	42	8.61	4	6	7.38	4	6	10.66	5	5	10.66	5	8	9.15	5	13	7.1	4	4
O43837	Isocitrate dehydrogenase [NAD] subunit beta, mitochondrial OS=Homo sapiens GN=IDH3B PE=1 SV=2 - [IDH3B_HUMAN]	10.65	1	3	3	19	10.65	3	3	10.65	2	3	6.23	1	4	10.65	2	4	10.65	2	3	10.65	2	2
O96007	Molybdopterin synthase catalytic subunit OS=Homo sapiens GN=MOCS2 PE=1 SV=1 - [MOC2B_HUMAN]	10.64	1	1	1	5	10.64	1	1				10.64	1	2	10.64	1	1	10.64	1	1
P09012	U1 small nuclear ribonucleoprotein A OS=Homo sapiens GN=SNRPA PE=1 SV=3 - [SNRPA_HUMAN]	10.64	1	2	2	9	10.64	1	2	10.64	1	1	10.64	2	2	10.64	2	2	10.64	1	1	10.64	1	1
Q9HB07	UPF0160 protein MYG1, mitochondrial OS=Homo sapiens GN=C12orf10 PE=1 SV=2 - [MYG1_HUMAN]	10.64	1	3	3	8	3.19	1	1				2.66	1	2	10.64	3	3	7.45	2	2
Q5JTV8	Torsin-1A-interacting protein 1 OS=Homo sapiens GN=TOR1AIP1 PE=1 SV=2 - [TOIP1_HUMAN]	10.63	1	4	4	21	5.15	2	2	5.15	2	3	8.75	3	3	10.63	4	7	5.15	2	2	7.03	3	4
P08195	4F2 cell-surface antigen heavy chain OS=Homo sapiens GN=SLC3A2 PE=1 SV=3 - [4F2_HUMAN]	10.63	1	6	6	67	6.03	4	11	8.73	5	9	10.63	6	17	8.73	5	9	8.73	5	8	8.73	5	13
Q9BRP1	Programmed cell death protein 2-like OS=Homo sapiens GN=PDCD2L PE=1 SV=1 - [PDD2L_HUMAN]	10.61	1	2	2	2													5.03	1	1	5.59	1	1
Q9Y277	Voltage-dependent anion-selective channel protein 3 OS=Homo sapiens GN=VDAC3 PE=1 SV=1 - [VDAC3_HUMAN]	10.6	1	1	2	4							3.53	1	1	7.07	1	3
P62879	Guanine nucleotide-binding protein G(I)/G(S)/G(T) subunit beta-2 OS=Homo sapiens GN=GNB2 PE=1 SV=3 - [GBB2_HUMAN]	10.59	1	2	4	31	10.59	3	6	9.71	2	4	10.59	4	5	9.71	3	3	9.71	3	5	10.59	3	8
Q8WZA9	Immunity-related GTPase family Q protein OS=Homo sapiens GN=IRGQ PE=1 SV=1 - [IRGQ_HUMAN]	10.59	1	4	4	17	6.1	3	4	3.69	2	3	8.19	3	6	1.93	1	1	1.93	1	2	1.93	1	1
P05412	Transcription factor AP-1 OS=Homo sapiens GN=JUN PE=1 SV=2 - [JUN_HUMAN]	10.57	1	2	2	14	10.57	2	4	4.53	1	2	10.57	2	2	10.57	2	2	4.53	1	1	4.53	1	3
P55786	Puromycin-sensitive aminopeptidase OS=Homo sapiens GN=NPEPPS PE=1 SV=2 - [PSA_HUMAN]	10.55	2	8	8	57	5.55	6	11	6.09	6	9	7.18	6	9	9.14	6	11	7.51	7	9	6.09	6	8
Q05519	Serine/arginine-rich splicing factor 11 OS=Homo sapiens GN=SRSF11 PE=1 SV=1 - [SRS11_HUMAN]	10.54	1	4	4	26	6.2	2	3	6.2	2	2	6.2	2	5	10.54	3	8	6.2	2	3	6.2	3	5
Q9H6T3	RNA polymerase II-associated protein 3 OS=Homo sapiens GN=RPAP3 PE=1 SV=2 - [RPAP3_HUMAN]	10.53	1	6	6	34	7.07	3	4	4.81	3	4	8.27	4	4	7.07	4	11	4.81	3	7	4.81	3	4
Q08170	Serine/arginine-rich splicing factor 4 OS=Homo sapiens GN=SRSF4 PE=1 SV=2 - [SRSF4_HUMAN]	10.53	1	3	5	51	4.86	3	6	4.86	3	8	10.53	5	11	10.53	4	8	4.86	3	7	7.89	4	11
P55263	Adenosine kinase OS=Homo sapiens GN=ADK PE=1 SV=2 - [ADK_HUMAN]	10.5	1	4	4	9				3.59	2	2	6.63	2	2	7.18	2	2	3.31	1	2	3.31	1	1
Q14657	EKC/KEOPS complex subunit LAGE3 OS=Homo sapiens GN=LAGE3 PE=1 SV=2 - [LAGE3_HUMAN]	10.49	1	1	1	2	10.49	1	1				10.49	1	1
O00267	Transcription elongation factor SPT5 OS=Homo sapiens GN=SUPT5H PE=1 SV=1 - [SPT5H_HUMAN]	10.49	1	7	7	42	3.5	3	7	4.32	4	7	5.61	4	8	3.96	4	9	2.21	2	4	2.21	2	7
Q12996	Cleavage stimulation factor subunit 3 OS=Homo sapiens GN=CSTF3 PE=1 SV=1 - [CSTF3_HUMAN]	10.46	1	3	3	7	3.49	1	1				7.11	2	2				10.46	3	3	3.63	1	1
Q92900	Regulator of nonsense transcripts 1 OS=Homo sapiens GN=UPF1 PE=1 SV=2 - [RENT1_HUMAN]	10.45	1	9	9	64	7.44	5	9	9.39	7	9	9.21	7	11	8.24	6	14	9.48	8	13	9.21	6	8
P11831	Serum response factor OS=Homo sapiens GN=SRF PE=1 SV=1 - [SRF_HUMAN]	10.43	1	2	2	3	4.72	1	1				5.71	1	2
P20248	Cyclin-A2 OS=Homo sapiens GN=CCNA2 PE=1 SV=2 - [CCNA2_HUMAN]	10.42	1	3	3	32	7.64	1	2	10.42	2	7	10.42	3	8	7.64	1	3	10.42	3	5	7.64	1	7
Q12797	Aspartyl/asparaginyl beta-hydroxylase OS=Homo sapiens GN=ASPH PE=1 SV=3 - [ASPH_HUMAN]	10.42	1	5	5	22	1.98	1	3	1.98	1	3	1.98	1	2	1.98	1	3	7.65	4	6	4.75	2	5
Q9NRP4	Succinate dehydrogenase assembly factor 3, mitochondrial OS=Homo sapiens GN=ACN9 PE=2 SV=1 - [SDHF3_HUMAN]	10.4	1	1	1	4	10.4	1	1				10.4	1	2				10.4	1	1
Q15599	Na(+)/H(+) exchange regulatory cofactor NHE-RF2 OS=Homo sapiens GN=SLC9A3R2 PE=1 SV=2 - [NHRF2_HUMAN]	10.39	1	3	3	20	3.26	1	1	7.72	2	2	7.72	2	6	10.39	3	5	7.72	2	3	7.72	2	3
P46940	Ras GTPase-activating-like protein IQGAP1 OS=Homo sapiens GN=IQGAP1 PE=1 SV=1 - [IQGA1_HUMAN]	10.38	1	12	12	34	2.23	3	4	1.81	3	3	7.18	7	9	3.32	5	7	4.1	5	5	2.9	4	6
Q6UX04	Peptidyl-prolyl cis-trans isomerase CWC27 homolog OS=Homo sapiens GN=CWC27 PE=1 SV=1 - [CWC27_HUMAN]	10.38	1	2	2	9	10.38	2	3	7.2	1	1	7.2	1	2	7.2	1	1	7.2	1	1	7.2	1	1
Q8IUD2	ELKS/Rab6-interacting/CAST family member 1 OS=Homo sapiens GN=ERC1 PE=1 SV=1 - [RB6I2_HUMAN]	10.3	1	7	7	27	5.11	3	5	3.85	2	2	4.57	4	4	5.11	4	7	3.67	2	3	7.35	5	6
Q16842	CMP-N-acetylneuraminate-beta-galactosamide-alpha-2,3-sialyltransferase 2 OS=Homo sapiens GN=ST3GAL2 PE=2 SV=1 - [SIA4B_HUMAN]	10.29	1	1	1	1													10.29	1	1
P61326	Protein mago nashi homolog OS=Homo sapiens GN=MAGOH PE=1 SV=1 - [MGN_HUMAN]	10.27	2	1	1	5	10.27	1	1				10.27	1	1	10.27	1	1	10.27	1	1	10.27	1	1
P54619	5'-AMP-activated protein kinase subunit gamma-1 OS=Homo sapiens GN=PRKAG1 PE=1 SV=1 - [AAKG1_HUMAN]	10.27	1	1	1	4	10.27	1	1	10.27	1	1				10.27	1	1	10.27	1	1
O00567	Nucleolar protein 56 OS=Homo sapiens GN=NOP56 PE=1 SV=4 - [NOP56_HUMAN]	10.27	1	3	3	23	6.4	2	4	2.02	1	2	6.4	2	4	10.27	3	7	2.02	1	2	2.02	1	4
Q9Y5J1	U3 small nucleolar RNA-associated protein 18 homolog OS=Homo sapiens GN=UTP18 PE=1 SV=3 - [UTP18_HUMAN]	10.25	1	4	4	18	4.32	2	2	2.34	1	2	4.5	2	3	8.09	3	4	6.65	3	5	2.34	1	2
Q13257	Mitotic spindle assembly checkpoint protein MAD2A OS=Homo sapiens GN=MAD2L1 PE=1 SV=1 - [MD2L1_HUMAN]	10.24	1	1	1	24	10.24	1	3	10.24	1	2	10.24	1	4	10.24	1	4	10.24	1	4	10.24	1	7
P22307	Non-specific lipid-transfer protein OS=Homo sapiens GN=SCP2 PE=1 SV=2 - [NLTP_HUMAN]	10.24	1	6	6	36	7.86	4	5	6.4	3	3	8.41	4	7	10.24	6	10	8.41	4	6	8.41	4	5
Q7Z2W9	39S ribosomal protein L21, mitochondrial OS=Homo sapiens GN=MRPL21 PE=1 SV=2 - [RM21_HUMAN]	10.24	1	2	2	3	4.88	1	1				10.24	2	2
Q569G3	Uncharacterized protein C5orf47 OS=Homo sapiens GN=C5orf47 PE=2 SV=2 - [CE047_HUMAN]	10.23	1	1	1	1				10.23	1	1
P50583	Bis(5'-nucleosyl)-tetraphosphatase [asymmetrical] OS=Homo sapiens GN=NUDT2 PE=1 SV=3 - [AP4A_HUMAN]	10.2	1	1	1	8	10.2	1	1	10.2	1	1	10.2	1	3	10.2	1	1	10.2	1	1	10.2	1	1
P42285	Superkiller viralicidic activity 2-like 2 OS=Homo sapiens GN=SKIV2L2 PE=1 SV=3 - [SK2L2_HUMAN]	10.17	1	7	7	40	5.76	4	6	5.76	4	4	7.49	6	8	8.45	5	7	8.45	5	7	5.76	4	8
Q9BUL5	PHD finger protein 23 OS=Homo sapiens GN=PHF23 PE=1 SV=1 - [PHF23_HUMAN]	10.17	1	2	2	2							6.7	1	1				3.47	1	1
Q96KR1	Zinc finger RNA-binding protein OS=Homo sapiens GN=ZFR PE=1 SV=2 - [ZFR_HUMAN]	10.15	1	6	7	38	2.42	2	5	2.33	2	4	9.4	6	9	9.31	5	7	7.36	4	9	1.58	1	4
Q6ZSR9	Uncharacterized protein FLJ45252 OS=Homo sapiens PE=2 SV=2 - [YJ005_HUMAN]	10.14	1	1	1	1							10.14	1	1
P15121	Aldose reductase OS=Homo sapiens GN=AKR1B1 PE=1 SV=3 - [ALDR_HUMAN]	10.13	1	2	2	23	10.13	2	5	10.13	2	3	10.13	2	4	10.13	2	3	10.13	2	3	10.13	2	5
O14777	Kinetochore protein NDC80 homolog OS=Homo sapiens GN=NDC80 PE=1 SV=1 - [NDC80_HUMAN]	10.12	1	4	4	11	2.34	1	1	2.34	1	1	7.94	3	3	7.79	3	4	2.96	1	1	2.96	1	1
P15408	Fos-related antigen 2 OS=Homo sapiens GN=FOSL2 PE=1 SV=1 - [FOSL2_HUMAN]	10.12	1	1	1	3							10.12	1	1	10.12	1	1				10.12	1	1
P18031	Tyrosine-protein phosphatase non-receptor type 1 OS=Homo sapiens GN=PTPN1 PE=1 SV=1 - [PTN1_HUMAN]	10.11	1	3	3	18	7.36	2	4	2.53	1	1	2.53	1	2	10.11	3	5	7.36	2	4	2.53	1	2
P20645	Cation-dependent mannose-6-phosphate receptor OS=Homo sapiens GN=M6PR PE=1 SV=1 - [MPRD_HUMAN]	10.11	1	1	1	6	10.11	1	1	10.11	1	1	10.11	1	1	10.11	1	1	10.11	1	1	10.11	1	1
P13674	Prolyl 4-hydroxylase subunit alpha-1 OS=Homo sapiens GN=P4HA1 PE=1 SV=2 - [P4HA1_HUMAN]	10.11	1	4	4	19	5.62	2	2	8.24	3	4	3	1	1	10.11	4	6	3	1	1	8.24	3	5
O43395	U4/U6 small nuclear ribonucleoprotein Prp3 OS=Homo sapiens GN=PRPF3 PE=1 SV=2 - [PRPF3_HUMAN]	10.1	1	5	5	25	4.54	2	2	4.98	2	4	6.59	3	4	8.49	4	8	4.98	2	4	6.15	2	3
O75390	Citrate synthase, mitochondrial OS=Homo sapiens GN=CS PE=1 SV=2 - [CISY_HUMAN]	10.09	1	5	5	35	9.44	4	8	3.86	1	2	7.3	3	8	10.09	5	10	3.86	2	4	3.86	2	3
Q8IY67	Ribonucleoprotein PTB-binding 1 OS=Homo sapiens GN=RAVER1 PE=1 SV=1 - [RAVR1_HUMAN]	10.07	1	2	2	2							3.14	1	1				6.93	1	1
Q01780	Exosome component 10 OS=Homo sapiens GN=EXOSC10 PE=1 SV=2 - [EXOSX_HUMAN]	10.06	1	5	5	21	8.25	4	4	7.12	3	3	7.12	3	4	7.34	3	3	5.54	2	4	5.54	2	3
O75439	Mitochondrial-processing peptidase subunit beta OS=Homo sapiens GN=PMPCB PE=1 SV=2 - [MPPB_HUMAN]	10.02	1	4	4	34	4.91	2	3	5.32	2	4	10.02	4	7	10.02	4	11	8.38	3	5	5.32	2	4
P53602	Diphosphomevalonate decarboxylase OS=Homo sapiens GN=MVD PE=1 SV=1 - [MVD1_HUMAN]	10	1	3	3	13	5	1	2	7.5	2	3	10	3	3	2.5	1	1	7.5	2	3	5	1	1
Q9BSJ8	Extended synaptotagmin-1 OS=Homo sapiens GN=ESYT1 PE=1 SV=1 - [ESYT1_HUMAN]	9.96	1	12	12	56	7.07	6	7	8.33	7	8	7.97	7	12	6.52	7	9	6.43	6	11	8.33	7	9
O60784	Target of Myb protein 1 OS=Homo sapiens GN=TOM1 PE=1 SV=2 - [TOM1_HUMAN]	9.96	1	2	2	2							6.1	1	1	3.86	1	1
Q6NYC8	Phostensin OS=Homo sapiens GN=PPP1R18 PE=1 SV=1 - [PPR18_HUMAN]	9.95	1	4	4	28	8.16	3	5	8.16	3	4	9.95	4	7	9.95	4	4	9.95	4	6	5.55	2	2
Q96P16	Regulation of nuclear pre-mRNA domain-containing protein 1A OS=Homo sapiens GN=RPRD1A PE=1 SV=1 - [RPR1A_HUMAN]	9.94	1	2	2	15	5.77	1	1	9.94	2	3	5.77	1	2	5.77	1	3	5.77	1	5	5.77	1	1
Q14126	Desmoglein-2 OS=Homo sapiens GN=DSG2 PE=1 SV=2 - [DSG2_HUMAN]	9.93	1	7	7	99	7.69	4	23	6.08	3	18	7.78	4	18	7.69	5	18	8.23	5	13	6.08	3	9
O95782	AP-2 complex subunit alpha-1 OS=Homo sapiens GN=AP2A1 PE=1 SV=3 - [AP2A1_HUMAN]	9.93	1	6	6	26	4.91	3	6	1.13	1	2	4.91	4	8	8.6	4	4	5.12	2	2	1.13	1	4
Q9Y2R9	28S ribosomal protein S7, mitochondrial OS=Homo sapiens GN=MRPS7 PE=1 SV=2 - [RT07_HUMAN]	9.92	1	2	2	10	4.96	1	1	4.96	1	1	4.96	1	1	4.96	1	2	4.96	1	2	9.92	2	3
O75874	Isocitrate dehydrogenase [NADP] cytoplasmic OS=Homo sapiens GN=IDH1 PE=1 SV=2 - [IDHC_HUMAN]	9.9	1	3	3	13	6.76	2	2				6.76	2	2	6.76	2	6	6.76	2	3
Q15126	Phosphomevalonate kinase OS=Homo sapiens GN=PMVK PE=1 SV=3 - [PMVK_HUMAN]	9.9	1	1	1	2							9.9	1	1	9.9	1	1
P35637	RNA-binding protein FUS OS=Homo sapiens GN=FUS PE=1 SV=1 - [FUS_HUMAN]	9.89	1	4	5	68	9.89	5	11	9.89	5	14	9.89	5	10	9.89	5	12	9.89	5	12	9.89	5	9
P53621	Coatomer subunit alpha OS=Homo sapiens GN=COPA PE=1 SV=2 - [COPA_HUMAN]	9.89	1	8	8	53	6.94	6	10	2.53	2	10	7.6	5	11	5.47	5	9	4.49	4	6	3.84	3	7
O94826	Mitochondrial import receptor subunit TOM70 OS=Homo sapiens GN=TOMM70A PE=1 SV=1 - [TOM70_HUMAN]	9.87	1	4	4	24	7.89	3	3	4.93	2	3	7.89	3	5	8.06	3	4	7.89	3	3	7.89	3	6
Q96HY6	DDRGK domain-containing protein 1 OS=Homo sapiens GN=DDRGK1 PE=1 SV=2 - [DDRGK_HUMAN]	9.87	1	2	2	3										9.87	2	3
Q8IYB5	Stromal membrane-associated protein 1 OS=Homo sapiens GN=SMAP1 PE=1 SV=2 - [SMAP1_HUMAN]	9.85	2	3	3	10	3	1	2	4.71	2	2	3	1	3	5.14	1	1	3	1	1	3	1	1
P62495	Eukaryotic peptide chain release factor subunit 1 OS=Homo sapiens GN=ETF1 PE=1 SV=3 - [ERF1_HUMAN]	9.84	1	5	5	37	9.84	4	6	9.84	3	8	9.84	4	5	9.84	4	7	9.84	4	7	9.84	3	4
P30508	HLA class I histocompatibility antigen, Cw-12 alpha chain OS=Homo sapiens GN=HLA-C PE=1 SV=2 - [1C12_HUMAN]	9.84	26	0	3	15	3.01	1	1	3.01	1	2	9.84	3	3	6.01	2	5	6.01	2	3	3.01	1	1
P30504	HLA class I histocompatibility antigen, Cw-4 alpha chain OS=Homo sapiens GN=HLA-C PE=1 SV=1 - [1C04_HUMAN]	9.84	22	0	3	12	3.01	1	1	3.01	1	2	6.83	2	2	6.01	2	4	3.01	1	2	3.01	1	1
Q53RE8	Ankyrin repeat domain-containing protein 39 OS=Homo sapiens GN=ANKRD39 PE=1 SV=1 - [ANR39_HUMAN]	9.84	1	1	1	2										9.84	1	1	9.84	1	1
P82663	28S ribosomal protein S25, mitochondrial OS=Homo sapiens GN=MRPS25 PE=1 SV=1 - [RT25_HUMAN]	9.83	1	1	1	6	9.83	1	3				9.83	1	1	9.83	1	1	9.83	1	1
Q9H3Q1	Cdc42 effector protein 4 OS=Homo sapiens GN=CDC42EP4 PE=1 SV=1 - [BORG4_HUMAN]	9.83	1	1	2	2							1.69	1	1							8.15	1	1
Q96GQ7	Probable ATP-dependent RNA helicase DDX27 OS=Homo sapiens GN=DDX27 PE=1 SV=2 - [DDX27_HUMAN]	9.8	1	7	7	29	4.52	3	4	4.15	2	3	4.27	2	5	5.53	3	4	5.65	3	6	7.29	5	7
Q53FV1	ORM1-like protein 2 OS=Homo sapiens GN=ORMDL2 PE=2 SV=2 - [ORML2_HUMAN]	9.8	2	1	1	2										9.8	1	1				9.8	1	1
P21452	Substance-K receptor OS=Homo sapiens GN=TACR2 PE=1 SV=3 - [NK2R_HUMAN]	9.8	1	1	1	1																9.8	1	1
P49750	YLP motif-containing protein 1 OS=Homo sapiens GN=YLPM1 PE=1 SV=3 - [YLPM1_HUMAN]	9.79	1	10	10	65	5.54	6	10	4.92	5	10	6.77	6	7	9.79	10	14	7.28	7	11	5.84	6	13
Q9Y6K9	NF-kappa-B essential modulator OS=Homo sapiens GN=IKBKG PE=1 SV=2 - [NEMO_HUMAN]	9.79	1	2	2	2										4.77	1	1				5.01	1	1
Q14376	UDP-glucose 4-epimerase OS=Homo sapiens GN=GALE PE=1 SV=2 - [GALE_HUMAN]	9.77	1	2	2	10				3.74	1	1	9.77	2	2	3.74	1	3	3.74	1	2	9.77	2	2
Q86TX2	Acyl-coenzyme A thioesterase 1 OS=Homo sapiens GN=ACOT1 PE=1 SV=1 - [ACOT1_HUMAN]	9.74	2	3	3	18	9.74	3	3	2.85	1	2	9.74	3	5	9.74	3	4	2.85	1	1	7.13	2	3
Q08379	Golgin subfamily A member 2 OS=Homo sapiens GN=GOLGA2 PE=1 SV=3 - [GOGA2_HUMAN]	9.68	1	6	6	29	6.49	4	4	6.99	4	4	2.69	2	2	7.98	5	12	4.79	3	3	4.29	3	4
Q9NWH9	SAFB-like transcription modulator OS=Homo sapiens GN=SLTM PE=1 SV=2 - [SLTM_HUMAN]	9.67	1	8	8	40	6	4	7	4.26	3	7	4.26	3	6	7.35	6	7	6	4	5	5.32	4	8
Q86V88	Magnesium-dependent phosphatase 1 OS=Homo sapiens GN=MDP1 PE=1 SV=1 - [MGDP1_HUMAN]	9.66	1	1	1	5				9.66	1	1				9.66	1	3	9.66	1	1
P30520	Adenylosuccinate synthetase isozyme 2 OS=Homo sapiens GN=ADSS PE=1 SV=3 - [PURA2_HUMAN]	9.65	1	3	3	31	3.73	1	3	9.65	3	6	9.65	3	5	9.65	3	8	9.65	3	5	9.65	3	4
Q9Y5B9	FACT complex subunit SPT16 OS=Homo sapiens GN=SUPT16H PE=1 SV=1 - [SP16H_HUMAN]	9.65	1	9	9	58	6.11	5	8	6.11	5	10	7.93	7	7	9.65	9	14	6.11	5	9	6.88	6	10
Q96I23	Protein preY, mitochondrial OS=Homo sapiens GN=PYURF PE=1 SV=1 - [PREY_HUMAN]	9.65	1	1	1	2				9.65	1	2
Q13643	Four and a half LIM domains protein 3 OS=Homo sapiens GN=FHL3 PE=1 SV=4 - [FHL3_HUMAN]	9.64	1	1	1	14	9.64	1	3	9.64	1	3	9.64	1	1	9.64	1	3	9.64	1	4
P13984	General transcription factor IIF subunit 2 OS=Homo sapiens GN=GTF2F2 PE=1 SV=2 - [T2FB_HUMAN]	9.64	1	2	2	3										9.64	2	2				5.22	1	1
O75475	PC4 and SFRS1-interacting protein OS=Homo sapiens GN=PSIP1 PE=1 SV=1 - [PSIP1_HUMAN]	9.62	1	6	6	38	6.23	4	7	9.43	5	7	4.53	3	5	9.62	6	9	6.23	4	5	7.74	4	5
P08754	Guanine nucleotide-binding protein G(k) subunit alpha OS=Homo sapiens GN=GNAI3 PE=1 SV=3 - [GNAI3_HUMAN]	9.6	8	1	4	11	4.52	2	2	5.37	1	1	5.37	2	4	8.76	2	2	4.52	1	1	4.52	1	1
Q9BUJ2	Heterogeneous nuclear ribonucleoprotein U-like protein 1 OS=Homo sapiens GN=HNRNPUL1 PE=1 SV=2 - [HNRL1_HUMAN]	9.58	1	9	9	50	9.35	6	7	9.58	8	10	9.46	6	7	9.46	8	11	4.79	6	9	6.78	5	6
P61158	Actin-related protein 3 OS=Homo sapiens GN=ACTR3 PE=1 SV=3 - [ARP3_HUMAN]	9.57	1	2	2	5	5.74	1	1				9.57	2	2				5.74	1	2
P85037	Forkhead box protein K1 OS=Homo sapiens GN=FOXK1 PE=1 SV=1 - [FOXK1_HUMAN]	9.55	1	5	5	84	7.91	4	16	7.91	4	15	7.91	3	14	9.55	5	15	7.91	4	12	7.91	3	12
Q15046	Lysine--tRNA ligase OS=Homo sapiens GN=KARS PE=1 SV=3 - [SYK_HUMAN]	9.55	1	4	4	11	1.68	1	1	1.68	1	1	4.36	2	2	6.87	3	4	1.68	1	1	1.68	1	2
O75629	Protein CREG1 OS=Homo sapiens GN=CREG1 PE=1 SV=1 - [CREG1_HUMAN]	9.55	1	1	1	1							9.55	1	1
Q9BWH2	FUN14 domain-containing protein 2 OS=Homo sapiens GN=FUNDC2 PE=1 SV=2 - [FUND2_HUMAN]	9.52	1	1	1	4										9.52	1	1	9.52	1	1	9.52	1	2
Q00534	Cyclin-dependent kinase 6 OS=Homo sapiens GN=CDK6 PE=1 SV=1 - [CDK6_HUMAN]	9.51	1	3	3	12	9.51	2	3	6.75	1	1	6.75	1	1	6.75	2	2	9.51	3	4	6.75	1	1
Q8IVL6	Prolyl 3-hydroxylase 3 OS=Homo sapiens GN=LEPREL2 PE=1 SV=1 - [P3H3_HUMAN]	9.51	1	3	3	10	9.51	3	3				5.43	1	2	4.08	2	2	6.93	2	3
P08237	ATP-dependent 6-phosphofructokinase, muscle type OS=Homo sapiens GN=PFKM PE=1 SV=2 - [PFKAM_HUMAN]	9.49	1	4	4	19	4.87	2	2	1.92	1	1	6.54	3	3	7.31	3	8	1.92	1	1	4.36	2	4
Q8N5N7	39S ribosomal protein L50, mitochondrial OS=Homo sapiens GN=MRPL50 PE=1 SV=2 - [RM50_HUMAN]	9.49	1	1	1	6	9.49	1	2				9.49	1	3	9.49	1	1
Q8IX90	Spindle and kinetochore-associated protein 3 OS=Homo sapiens GN=SKA3 PE=1 SV=2 - [SKA3_HUMAN]	9.47	1	3	3	16	2.91	1	1	5.83	2	3	5.83	2	3				6.55	2	4	9.47	3	5
Q9ULR0	Pre-mRNA-splicing factor ISY1 homolog OS=Homo sapiens GN=ISY1 PE=1 SV=3 - [ISY1_HUMAN]	9.47	1	2	2	6							4.91	1	1	9.47	2	3	4.56	1	1	4.56	1	1
O43148	mRNA cap guanine-N7 methyltransferase OS=Homo sapiens GN=RNMT PE=1 SV=1 - [MCES_HUMAN]	9.45	1	3	3	7	3.99	1	1				2.52	1	2	5.46	2	2	6.93	2	2
P16070	CD44 antigen OS=Homo sapiens GN=CD44 PE=1 SV=3 - [CD44_HUMAN]	9.43	1	10	10	79	8.36	7	12	6.74	6	10	7.82	8	17	9.43	10	17	7.82	8	13	6.74	6	10
Q9Y3E0	Vesicle transport protein GOT1B OS=Homo sapiens GN=GOLT1B PE=1 SV=1 - [GOT1B_HUMAN]	9.42	1	1	1	1	9.42	1	1
Q5T3I0	G patch domain-containing protein 4 OS=Homo sapiens GN=GPATCH4 PE=1 SV=2 - [GPTC4_HUMAN]	9.42	1	3	3	12	6.28	2	4	2.47	1	1	2.47	1	2				9.42	3	4	2.47	1	1
Q96T60	Bifunctional polynucleotide phosphatase/kinase OS=Homo sapiens GN=PNKP PE=1 SV=1 - [PNKP_HUMAN]	9.4	1	4	4	15	6.91	3	3	2.3	1	2	4.22	2	2	4.8	2	2	4.8	2	2	4.8	2	4
Q9NQZ2	Something about silencing protein 10 OS=Homo sapiens GN=UTP3 PE=1 SV=1 - [SAS10_HUMAN]	9.39	1	2	2	7	9.39	2	2				9.39	2	2	9.39	2	2	2.92	1	1
Q9HBM1	Kinetochore protein Spc25 OS=Homo sapiens GN=SPC25 PE=1 SV=1 - [SPC25_HUMAN]	9.38	1	1	1	1				9.38	1	1
Q13153	Serine/threonine-protein kinase PAK 1 OS=Homo sapiens GN=PAK1 PE=1 SV=2 - [PAK1_HUMAN]	9.36	1	1	2	20	3.12	1	3	3.12	1	2	9.36	2	6	9.36	2	3	9.36	2	4	3.12	1	2
P51153	Ras-related protein Rab-13 OS=Homo sapiens GN=RAB13 PE=1 SV=1 - [RAB13_HUMAN]	9.36	1	2	2	6							9.36	1	1	9.36	2	2				9.36	2	3
Q9NXG2	THUMP domain-containing protein 1 OS=Homo sapiens GN=THUMPD1 PE=1 SV=2 - [THUM1_HUMAN]	9.35	1	2	2	14	4.25	1	2	4.25	1	1	4.25	1	2	9.35	2	4	4.25	1	1	9.35	2	4
Q92572	AP-3 complex subunit sigma-1 OS=Homo sapiens GN=AP3S1 PE=1 SV=1 - [AP3S1_HUMAN]	9.33	1	1	1	10	9.33	1	3	9.33	1	2	9.33	1	1	9.33	1	2	9.33	1	1	9.33	1	1
Q9Y5K8	V-type proton ATPase subunit D OS=Homo sapiens GN=ATP6V1D PE=1 SV=1 - [VATD_HUMAN]	9.31	1	1	1	5	9.31	1	1				9.31	1	2	9.31	1	1				9.31	1	1
Q9NP61	ADP-ribosylation factor GTPase-activating protein 3 OS=Homo sapiens GN=ARFGAP3 PE=1 SV=1 - [ARFG3_HUMAN]	9.3	1	3	3	6							4.84	1	1	9.3	3	4				4.46	1	1
P27824	Calnexin OS=Homo sapiens GN=CANX PE=1 SV=2 - [CALX_HUMAN]	9.29	1	5	5	37	9.29	3	4	9.29	4	6	9.29	4	5	9.29	4	5	9.29	4	8	9.29	4	9
Q99442	Translocation protein SEC62 OS=Homo sapiens GN=SEC62 PE=1 SV=1 - [SEC62_HUMAN]	9.27	1	4	4	34	7.02	3	6	7.02	3	4	7.02	3	7	9.27	4	5	7.02	3	7	7.02	3	5
Q15029	116 kDa U5 small nuclear ribonucleoprotein component OS=Homo sapiens GN=EFTUD2 PE=1 SV=1 - [U5S1_HUMAN]	9.26	1	4	5	12	1.13	1	2	1.13	1	2	3.19	2	2	4.53	3	3				3.81	2	3
Q16698	2,4-dienoyl-CoA reductase, mitochondrial OS=Homo sapiens GN=DECR1 PE=1 SV=1 - [DECR_HUMAN]	9.25	1	2	2	8	9.25	1	1	9.25	1	1	9.25	1	1	9.25	2	2	9.25	2	2	9.25	1	1
A1KXE4	Myelin-associated neurite-outgrowth inhibitor OS=Homo sapiens GN=FAM168B PE=1 SV=1 - [F168B_HUMAN]	9.23	1	1	1	16	9.23	1	4	9.23	1	2	9.23	1	2	9.23	1	3	9.23	1	3	9.23	1	2
Q9NP66	High mobility group protein 20A OS=Homo sapiens GN=HMG20A PE=1 SV=1 - [HM20A_HUMAN]	9.22	1	3	3	5	5.48	2	2							4.9	1	1				8.65	2	2
P02452	Collagen alpha-1(I) chain OS=Homo sapiens GN=COL1A1 PE=1 SV=5 - [CO1A1_HUMAN]	9.22	1	7	7	30	4.92	4	5	2.73	2	2	3.89	3	4	6.08	5	6	5.81	5	8	7.17	5	5
P28676	Grancalcin OS=Homo sapiens GN=GCA PE=1 SV=2 - [GRAN_HUMAN]	9.22	1	1	1	1										9.22	1	1
P49792	E3 SUMO-protein ligase RanBP2 OS=Homo sapiens GN=RANBP2 PE=1 SV=2 - [RBP2_HUMAN]	9.21	7	17	19	68	1.77	5	9	2.39	6	7	3.35	9	10	6.27	13	17	7.04	14	14	5.55	8	11
Q12981	Vesicle transport protein SEC20 OS=Homo sapiens GN=BNIP1 PE=1 SV=3 - [SEC20_HUMAN]	9.21	1	1	1	4				9.21	1	1				9.21	1	3
O43681	ATPase ASNA1 OS=Homo sapiens GN=ASNA1 PE=1 SV=2 - [ASNA_HUMAN]	9.2	1	2	2	8				6.32	1	1	2.87	1	1	9.2	2	3				6.32	1	3
P48645	Neuromedin-U OS=Homo sapiens GN=NMU PE=2 SV=1 - [NMU_HUMAN]	9.2	1	1	1	1							9.2	1	1
P52732	Kinesin-like protein KIF11 OS=Homo sapiens GN=KIF11 PE=1 SV=2 - [KIF11_HUMAN]	9.19	1	7	7	38	2.08	2	3	1.23	1	5	5.97	4	7	3.41	3	7	4.64	4	8	3.13	3	8
P49959	Double-strand break repair protein MRE11A OS=Homo sapiens GN=MRE11A PE=1 SV=3 - [MRE11_HUMAN]	9.18	1	4	4	23	3.95	2	4	4.1	2	3	9.18	4	6	6.36	3	4	4.1	2	2	3.95	2	4
O60271	C-Jun-amino-terminal kinase-interacting protein 4 OS=Homo sapiens GN=SPAG9 PE=1 SV=4 - [JIP4_HUMAN]	9.16	2	9	9	56	7.49	6	12	6.96	5	7	7.87	6	8	8.02	6	13	6.96	5	9	6.81	5	7
P23025	DNA repair protein complementing XP-A cells OS=Homo sapiens GN=XPA PE=1 SV=1 - [XPA_HUMAN]	9.16	1	1	1	1																9.16	1	1
Q8TDP1	Ribonuclease H2 subunit C OS=Homo sapiens GN=RNASEH2C PE=1 SV=1 - [RNH2C_HUMAN]	9.15	1	1	1	5				9.15	1	2	9.15	1	1				9.15	1	2
Q6QNY1	Biogenesis of lysosome-related organelles complex 1 subunit 2 OS=Homo sapiens GN=BLOC1S2 PE=1 SV=1 - [BL1S2_HUMAN]	9.15	1	1	1	1													9.15	1	1
O75521	Enoyl-CoA delta isomerase 2, mitochondrial OS=Homo sapiens GN=ECI2 PE=1 SV=4 - [ECI2_HUMAN]	9.14	1	3	3	16	4.31	2	3	4.31	2	3	4.31	2	2	4.31	2	2	4.31	2	2	9.14	3	4
P28074	Proteasome subunit beta type-5 OS=Homo sapiens GN=PSMB5 PE=1 SV=3 - [PSB5_HUMAN]	9.13	1	2	2	7	5.32	1	1	5.32	1	1	3.8	1	1	9.13	2	2	5.32	1	2
Q9Y320	Thioredoxin-related transmembrane protein 2 OS=Homo sapiens GN=TMX2 PE=1 SV=1 - [TMX2_HUMAN]	9.12	1	1	1	8	9.12	1	1				9.12	1	2	9.12	1	1	9.12	1	2	9.12	1	2
P0DI83	Ras-related protein Rab-34, isoform NARR OS=Homo sapiens GN=RAB34 PE=1 SV=1 - [NARR_HUMAN]	9.09	1	1	1	3	9.09	1	2							9.09	1	1
P43355	Melanoma-associated antigen 1 OS=Homo sapiens GN=MAGEA1 PE=1 SV=1 - [MAGA1_HUMAN]	9.06	7	1	3	11	6.15	2	3	2.59	1	1	5.5	2	3	2.59	1	1	6.15	2	2	2.59	1	1
Q9UBP6	tRNA (guanine-N(7)-)-methyltransferase OS=Homo sapiens GN=METTL1 PE=1 SV=1 - [TRMB_HUMAN]	9.06	1	2	2	6	4.71	1	1				4.71	1	1	4.35	1	1	4.71	1	2	4.71	1	1
O43818	U3 small nucleolar RNA-interacting protein 2 OS=Homo sapiens GN=RRP9 PE=1 SV=1 - [U3IP2_HUMAN]	9.05	1	3	3	11	5.68	2	4	9.05	3	3	2.11	1	1	3.58	1	2				3.58	1	1
Q14839	Chromodomain-helicase-DNA-binding protein 4 OS=Homo sapiens GN=CHD4 PE=1 SV=2 - [CHD4_HUMAN]	9.05	3	13	13	132	6.38	9	18	7.22	10	17	6.59	9	26	8.16	11	24	7.69	11	27	6.75	9	20
Q16531	DNA damage-binding protein 1 OS=Homo sapiens GN=DDB1 PE=1 SV=1 - [DDB1_HUMAN]	9.04	1	6	6	23	4.82	3	3	1.58	1	1	5.88	4	6	5.88	4	5	3.25	2	4	4.82	3	4
Q9NPQ8	Synembryn-A OS=Homo sapiens GN=RIC8A PE=1 SV=3 - [RIC8A_HUMAN]	9.04	1	3	3	15	5.46	2	2				5.46	2	3	6.78	2	4	3.2	1	3	3.2	1	3
P07196	Neurofilament light polypeptide OS=Homo sapiens GN=NEFL PE=1 SV=3 - [NFL_HUMAN]	9.02	2	3	4	23	4.6	2	3	7.92	3	5	9.02	4	5	4.6	2	3	4.6	2	4	4.6	2	3
Q13557	Calcium/calmodulin-dependent protein kinase type II subunit delta OS=Homo sapiens GN=CAMK2D PE=1 SV=3 - [KCC2D_HUMAN]	9.02	1	4	4	19	6.41	2	2	6.41	2	3	6.41	3	3	9.02	4	4	6.41	2	4	6.41	2	3
P04179	Superoxide dismutase [Mn], mitochondrial OS=Homo sapiens GN=SOD2 PE=1 SV=2 - [SODM_HUMAN]	9.01	1	2	2	11	6.31	1	1	9.01	2	2	6.31	1	1	6.31	1	3	9.01	2	2	6.31	1	2
P61026	Ras-related protein Rab-10 OS=Homo sapiens GN=RAB10 PE=1 SV=1 - [RAB10_HUMAN]	9	1	2	2	4	9	2	2							5.5	1	2
Q9GZR2	RNA exonuclease 4 OS=Homo sapiens GN=REXO4 PE=1 SV=2 - [REXO4_HUMAN]	9	1	2	2	9	3.79	1	1	9	2	3	3.79	1	1	3.79	1	1	3.79	1	1	3.79	1	2
Q96M27	Protein PRRC1 OS=Homo sapiens GN=PRRC1 PE=1 SV=1 - [PRRC1_HUMAN]	8.99	1	2	2	8	3.6	1	1	3.6	1	1	5.39	1	2	5.39	1	1	3.6	1	1	3.6	1	2
P14652	Homeobox protein Hox-B2 OS=Homo sapiens GN=HOXB2 PE=1 SV=1 - [HXB2_HUMAN]	8.99	1	1	1	1													8.99	1	1
Q7Z2W4	Zinc finger CCCH-type antiviral protein 1 OS=Homo sapiens GN=ZC3HAV1 PE=1 SV=3 - [ZCCHV_HUMAN]	8.98	1	5	5	24	1.66	1	1	4.1	3	4	7.87	4	9	2.99	2	2	4.1	3	4	2.99	2	4
Q9BVW5	TIMELESS-interacting protein OS=Homo sapiens GN=TIPIN PE=1 SV=2 - [TIPIN_HUMAN]	8.97	1	2	2	12	5.98	1	1	5.98	1	1	5.98	1	2	8.97	2	3	5.98	1	2	5.98	1	3
P49591	Serine--tRNA ligase, cytoplasmic OS=Homo sapiens GN=SARS PE=1 SV=3 - [SYSC_HUMAN]	8.95	1	4	4	25	5.84	2	4	6.61	3	3	6.61	3	5	8.95	4	6	6.61	3	4	6.61	3	3
Q96JP5	E3 ubiquitin-protein ligase ZFP91 OS=Homo sapiens GN=ZFP91 PE=1 SV=1 - [ZFP91_HUMAN]	8.95	1	3	3	11	2.11	1	1				8.95	3	4				4.56	2	5	2.46	1	1
O76094	Signal recognition particle subunit SRP72 OS=Homo sapiens GN=SRP72 PE=1 SV=3 - [SRP72_HUMAN]	8.94	1	4	4	6				1.64	1	1				7.3	3	4	1.64	1	1
O43169	Cytochrome b5 type B OS=Homo sapiens GN=CYB5B PE=1 SV=2 - [CYB5B_HUMAN]	8.9	1	1	1	15	8.9	1	1	8.9	1	6	8.9	1	3	8.9	1	2	8.9	1	2	8.9	1	1
Q5HYI8	Rab-like protein 3 OS=Homo sapiens GN=RABL3 PE=1 SV=1 - [RABL3_HUMAN]	8.9	1	1	1	10				8.9	1	2	8.9	1	2	8.9	1	3	8.9	1	1	8.9	1	2
Q9BVM2	Protein DPCD OS=Homo sapiens GN=DPCD PE=1 SV=2 - [DPCD_HUMAN]	8.87	1	1	1	1										8.87	1	1
Q8IUW5	RELT-like protein 1 OS=Homo sapiens GN=RELL1 PE=1 SV=1 - [RELL1_HUMAN]	8.86	1	1	1	3	8.86	1	1				8.86	1	1	8.86	1	1
P19784	Casein kinase II subunit alpha' OS=Homo sapiens GN=CSNK2A2 PE=1 SV=1 - [CSK22_HUMAN]	8.86	1	2	2	2	3.14	1	1							5.71	1	1
Q01844	RNA-binding protein EWS OS=Homo sapiens GN=EWSR1 PE=1 SV=1 - [EWS_HUMAN]	8.84	1	4	4	40	5.49	3	7	5.49	2	7	8.84	4	6	5.49	3	8	5.49	3	6	8.84	3	6
P24593	Insulin-like growth factor-binding protein 5 OS=Homo sapiens GN=IGFBP5 PE=1 SV=1 - [IBP5_HUMAN]	8.82	1	3	3	23	5.15	1	3	5.15	2	4	5.15	1	3	8.82	2	6	5.15	2	5	5.15	1	2
Q9H7B2	Ribosome production factor 2 homolog OS=Homo sapiens GN=RPF2 PE=1 SV=2 - [RPF2_HUMAN]	8.82	1	3	3	16	8.82	2	2	8.82	2	2	8.82	2	2	8.82	3	4	8.82	2	3	8.82	2	3
Q9BQ39	ATP-dependent RNA helicase DDX50 OS=Homo sapiens GN=DDX50 PE=1 SV=1 - [DDX50_HUMAN]	8.82	1	4	4	15	4.34	2	2	4.34	2	2	6.65	3	4	5.16	2	3	2.17	1	2	2.17	1	2
Q13596	Sorting nexin-1 OS=Homo sapiens GN=SNX1 PE=1 SV=3 - [SNX1_HUMAN]	8.81	1	3	3	18	3.07	1	2	5.75	2	2	3.07	1	1	8.81	3	6	3.07	1	4	5.75	2	3
Q9Y4G6	Talin-2 OS=Homo sapiens GN=TLN2 PE=1 SV=4 - [TLN2_HUMAN]	8.81	1	4	22	108	5.07	13	17	6.61	13	15	6.1	15	23	7	14	20	5.7	14	18	4.37	11	15
Q6PID6	Tetratricopeptide repeat protein 33 OS=Homo sapiens GN=TTC33 PE=1 SV=2 - [TTC33_HUMAN]	8.78	1	1	1	1							8.78	1	1
Q3ZCQ8	Mitochondrial import inner membrane translocase subunit TIM50 OS=Homo sapiens GN=TIMM50 PE=1 SV=2 - [TIM50_HUMAN]	8.78	1	2	2	7							3.4	1	1	3.4	1	1	8.78	2	3	5.38	1	2
Q9BUN8	Derlin-1 OS=Homo sapiens GN=DERL1 PE=1 SV=1 - [DERL1_HUMAN]	8.76	1	2	2	4										8.76	1	2	7.17	1	2
P24311	Cytochrome c oxidase subunit 7B, mitochondrial OS=Homo sapiens GN=COX7B PE=1 SV=2 - [COX7B_HUMAN]	8.75	1	1	1	5	8.75	1	1							8.75	1	2	8.75	1	2
P42704	Leucine-rich PPR motif-containing protein, mitochondrial OS=Homo sapiens GN=LRPPRC PE=1 SV=3 - [LPPRC_HUMAN]	8.75	1	8	8	60	5.16	5	10	3.87	4	6	5.16	5	11	8.75	8	14	3.87	4	10	5.16	5	9
Q9P0T7	Transmembrane protein 9 OS=Homo sapiens GN=TMEM9 PE=1 SV=1 - [TMEM9_HUMAN]	8.74	1	1	1	1	8.74	1	1
Q9P0J6	39S ribosomal protein L36, mitochondrial OS=Homo sapiens GN=MRPL36 PE=1 SV=1 - [RM36_HUMAN]	8.74	1	1	1	2				8.74	1	2
P43308	Translocon-associated protein subunit beta OS=Homo sapiens GN=SSR2 PE=1 SV=1 - [SSRB_HUMAN]	8.74	1	2	2	8				8.74	1	1	6.01	1	1	6.01	1	1	6.01	1	3	6.01	1	2
O95747	Serine/threonine-protein kinase OSR1 OS=Homo sapiens GN=OXSR1 PE=1 SV=1 - [OXSR1_HUMAN]	8.73	1	4	4	9	2.09	1	1	3.61	2	2	6.83	2	2	2.09	1	1	1.9	1	1	3.61	2	2
Q86UT8	Coiled-coil domain-containing protein 84 OS=Homo sapiens GN=CCDC84 PE=2 SV=1 - [CCD84_HUMAN]	8.73	1	2	2	31	8.73	2	7	8.73	2	4	3.01	1	1	8.73	2	3	8.73	2	8	8.73	2	8
Q9P1U0	DNA-directed RNA polymerase I subunit RPA12 OS=Homo sapiens GN=ZNRD1 PE=1 SV=1 - [RPA12_HUMAN]	8.73	1	1	1	2										8.73	1	2
P01033	Metalloproteinase inhibitor 1 OS=Homo sapiens GN=TIMP1 PE=1 SV=1 - [TIMP1_HUMAN]	8.7	1	1	1	1	8.7	1	1
Q9Y606	tRNA pseudouridine synthase A, mitochondrial OS=Homo sapiens GN=PUS1 PE=1 SV=3 - [TRUA_HUMAN]	8.67	1	3	3	7	4.68	1	1	4.68	1	2				6.79	2	2				4.68	1	2
Q969J3	Loss of heterozygosity 12 chromosomal region 1 protein OS=Homo sapiens GN=LOH12CR1 PE=1 SV=1 - [L12R1_HUMAN]	8.67	1	1	1	1	8.67	1	1
O00566	U3 small nucleolar ribonucleoprotein protein MPP10 OS=Homo sapiens GN=MPHOSPH10 PE=1 SV=2 - [MPP10_HUMAN]	8.66	1	4	4	16	4.7	2	2	2.94	1	1	6.75	3	3	6.75	3	4	2.94	1	2	6.61	3	4
Q9Y248	DNA replication complex GINS protein PSF2 OS=Homo sapiens GN=GINS2 PE=1 SV=1 - [PSF2_HUMAN]	8.65	1	1	1	14	8.65	1	1	8.65	1	3	8.65	1	1	8.65	1	3	8.65	1	4	8.65	1	2
Q9NZ63	Uncharacterized protein C9orf78 OS=Homo sapiens GN=C9orf78 PE=1 SV=1 - [CI078_HUMAN]	8.65	1	2	2	10	8.65	2	2	8.65	2	2	8.65	2	2	4.15	1	1	4.15	1	1	8.65	2	2
P04818	Thymidylate synthase OS=Homo sapiens GN=TYMS PE=1 SV=3 - [TYSY_HUMAN]	8.63	1	2	2	2										4.15	1	1				4.47	1	1
Q92804	TATA-binding protein-associated factor 2N OS=Homo sapiens GN=TAF15 PE=1 SV=1 - [RBP56_HUMAN]	8.61	1	4	5	55	8.61	5	9	7.77	4	7	7.77	4	10	7.77	4	9	7.77	4	9	7.77	4	11
Q969S3	Zinc finger protein 622 OS=Homo sapiens GN=ZNF622 PE=1 SV=1 - [ZN622_HUMAN]	8.6	1	4	4	11	6.5	2	2	3.14	1	1	6.08	2	3	3.14	1	1	8.18	3	3	3.14	1	1
P38606	V-type proton ATPase catalytic subunit A OS=Homo sapiens GN=ATP6V1A PE=1 SV=2 - [VATA_HUMAN]	8.59	1	4	4	35	8.59	4	5	8.59	4	7	8.59	4	7	8.59	4	4	7.29	3	3	8.59	4	9
O43815	Striatin OS=Homo sapiens GN=STRN PE=1 SV=4 - [STRN_HUMAN]	8.59	2	3	5	32	4.1	2	3	6.92	3	4	4.1	2	7	7.18	4	9	5.51	3	4	7.18	3	5
Q86UE4	Protein LYRIC OS=Homo sapiens GN=MTDH PE=1 SV=2 - [LYRIC_HUMAN]	8.59	1	2	2	14	4.64	1	2				3.95	1	1	8.59	2	6	3.95	1	2	8.59	2	3
Q9NYK5	39S ribosomal protein L39, mitochondrial OS=Homo sapiens GN=MRPL39 PE=1 SV=3 - [RM39_HUMAN]	8.58	1	3	3	14	8.58	2	2	8.58	2	4	8.58	2	2	8.28	2	2	3.55	1	1	8.58	2	3
O94817	Ubiquitin-like protein ATG12 OS=Homo sapiens GN=ATG12 PE=1 SV=1 - [ATG12_HUMAN]	8.57	1	1	1	1	8.57	1	1
Q9NW64	Pre-mRNA-splicing factor RBM22 OS=Homo sapiens GN=RBM22 PE=1 SV=1 - [RBM22_HUMAN]	8.57	1	3	3	15	4.52	1	3	6.19	2	4	4.52	1	1	6.9	2	2	4.52	1	1	6.19	2	4
O14531	Dihydropyrimidinase-related protein 4 OS=Homo sapiens GN=DPYSL4 PE=1 SV=2 - [DPYL4_HUMAN]	8.57	1	3	3	3										4.55	2	2				4.02	1	1
Q9BRK5	45 kDa calcium-binding protein OS=Homo sapiens GN=SDF4 PE=1 SV=1 - [CAB45_HUMAN]	8.56	1	2	2	6	3.87	1	1	3.87	1	1	3.87	1	1	8.56	2	2				3.87	1	1
Q14165	Malectin OS=Homo sapiens GN=MLEC PE=1 SV=1 - [MLEC_HUMAN]	8.56	1	1	2	2							4.45	1	1				4.11	1	1
Q04941	Proteolipid protein 2 OS=Homo sapiens GN=PLP2 PE=1 SV=1 - [PLP2_HUMAN]	8.55	1	1	1	4	8.55	1	1	8.55	1	1	8.55	1	1				8.55	1	1
Q13011	Delta(3,5)-Delta(2,4)-dienoyl-CoA isomerase, mitochondrial OS=Homo sapiens GN=ECH1 PE=1 SV=2 - [ECH1_HUMAN]	8.54	1	2	2	20	8.54	2	3	8.54	2	3	8.54	2	4	8.54	2	3	8.54	2	3	8.54	2	4
O14974	Protein phosphatase 1 regulatory subunit 12A OS=Homo sapiens GN=PPP1R12A PE=1 SV=1 - [MYPT1_HUMAN]	8.54	1	9	9	28	4.08	4	4	3.11	3	3	4.85	5	6	6.99	7	8	3.01	2	3	4.27	4	4
P11172	Uridine 5'-monophosphate synthase OS=Homo sapiens GN=UMPS PE=1 SV=1 - [UMPS_HUMAN]	8.54	1	2	2	4							5	1	1	8.54	2	2	3.54	1	1
Q96FK6	WD repeat-containing protein 89 OS=Homo sapiens GN=WDR89 PE=1 SV=1 - [WDR89_HUMAN]	8.53	1	2	2	15	3.88	1	2	3.88	1	3	8.53	2	5	3.88	1	2	3.88	1	1	3.88	1	2
Q96B01	RAD51-associated protein 1 OS=Homo sapiens GN=RAD51AP1 PE=1 SV=1 - [R51A1_HUMAN]	8.52	1	2	2	9	8.52	2	3	8.52	2	2	5.4	1	3	5.4	1	1
Q8WUJ0	Serine/threonine/tyrosine-interacting protein OS=Homo sapiens GN=STYX PE=1 SV=1 - [STYX_HUMAN]	8.52	1	1	1	1										8.52	1	1
Q9P2J5	Leucine--tRNA ligase, cytoplasmic OS=Homo sapiens GN=LARS PE=1 SV=2 - [SYLC_HUMAN]	8.5	1	7	7	44	4.93	4	9	2.72	2	6	6.29	4	9	4.08	4	10	4.93	5	5	2.72	2	5
Q9NX70	Mediator of RNA polymerase II transcription subunit 29 OS=Homo sapiens GN=MED29 PE=1 SV=1 - [MED29_HUMAN]	8.5	1	1	1	14	8.5	1	3	8.5	1	1	8.5	1	3	8.5	1	2	8.5	1	2	8.5	1	3
Q9BZG1	Ras-related protein Rab-34 OS=Homo sapiens GN=RAB34 PE=1 SV=1 - [RAB34_HUMAN]	8.49	1	2	2	10	3.47	1	2	3.47	1	2	3.47	1	2	5.02	1	1	3.47	1	2	3.47	1	1
O15269	Serine palmitoyltransferase 1 OS=Homo sapiens GN=SPTLC1 PE=1 SV=1 - [SPTC1_HUMAN]	8.46	1	2	2	9	8.46	2	2	2.54	1	1	8.46	2	2	2.54	1	1	2.54	1	1	2.54	1	2
P26885	Peptidyl-prolyl cis-trans isomerase FKBP2 OS=Homo sapiens GN=FKBP2 PE=1 SV=2 - [FKBP2_HUMAN]	8.45	1	1	1	8	8.45	1	2	8.45	1	2	8.45	1	1	8.45	1	2				8.45	1	1
O43242	26S proteasome non-ATPase regulatory subunit 3 OS=Homo sapiens GN=PSMD3 PE=1 SV=2 - [PSMD3_HUMAN]	8.43	1	3	3	6	3.37	1	1	3.37	1	1				5.06	2	2	2.43	1	1	3.37	1	1
Q9P0L0	Vesicle-associated membrane protein-associated protein A OS=Homo sapiens GN=VAPA PE=1 SV=3 - [VAPA_HUMAN]	8.43	1	1	2	7	5.22	1	1							8.43	2	6
P63010	AP-2 complex subunit beta OS=Homo sapiens GN=AP2B1 PE=1 SV=1 - [AP2B1_HUMAN]	8.43	1	4	6	19	8.22	5	6	2.56	2	3	4.06	2	2	6.19	4	6	2.45	2	2
Q4LDG9	Dynein light chain 1, axonemal OS=Homo sapiens GN=DNAL1 PE=1 SV=1 - [DNAL1_HUMAN]	8.42	1	1	1	1				8.42	1	1
P07711	Cathepsin L1 OS=Homo sapiens GN=CTSL PE=1 SV=2 - [CATL1_HUMAN]	8.41	1	2	2	19	8.41	2	3	8.41	2	4	8.41	2	3	8.41	2	3	8.41	2	3	8.41	2	3
O00762	Ubiquitin-conjugating enzyme E2 C OS=Homo sapiens GN=UBE2C PE=1 SV=1 - [UBE2C_HUMAN]	8.38	1	1	1	10	8.38	1	1	8.38	1	2	8.38	1	1	8.38	1	3	8.38	1	2	8.38	1	1
Q9NXR1	Nuclear distribution protein nudE homolog 1 OS=Homo sapiens GN=NDE1 PE=1 SV=2 - [NDE1_HUMAN]	8.38	2	3	3	12	3.47	1	2	3.47	1	2	3.47	1	2	8.09	2	3	3.76	1	1	4.62	1	2
O75525	KH domain-containing, RNA-binding, signal transduction-associated protein 3 OS=Homo sapiens GN=KHDRBS3 PE=1 SV=1 - [KHDR3_HUMAN]	8.38	1	2	2	6				6.07	1	1				8.38	2	2	8.38	2	2	6.07	1	1
P36873	Serine/threonine-protein phosphatase PP1-gamma catalytic subunit OS=Homo sapiens GN=PPP1CC PE=1 SV=1 - [PP1G_HUMAN]	8.36	2	1	3	17	4.64	1	2	4.64	1	1	8.36	2	3	8.36	3	6	8.36	2	3	4.64	1	2
P82673	28S ribosomal protein S35, mitochondrial OS=Homo sapiens GN=MRPS35 PE=1 SV=1 - [RT35_HUMAN]	8.36	1	1	1	8	8.36	1	2				8.36	1	2	8.36	1	2	8.36	1	1	8.36	1	1
O15143	Actin-related protein 2/3 complex subunit 1B OS=Homo sapiens GN=ARPC1B PE=1 SV=3 - [ARC1B_HUMAN]	8.33	1	3	3	16	5.11	1	1	8.33	2	2	8.33	3	3	8.33	3	6	7.8	2	3	5.11	1	1
Q53H82	Beta-lactamase-like protein 2 OS=Homo sapiens GN=LACTB2 PE=1 SV=2 - [LACB2_HUMAN]	8.33	1	1	1	4	8.33	1	1										8.33	1	2	8.33	1	1
P52298	Nuclear cap-binding protein subunit 2 OS=Homo sapiens GN=NCBP2 PE=1 SV=1 - [NCBP2_HUMAN]	8.33	1	1	1	3										8.33	1	2				8.33	1	1
O14744	Protein arginine N-methyltransferase 5 OS=Homo sapiens GN=PRMT5 PE=1 SV=4 - [ANM5_HUMAN]	8.32	1	3	3	21	4.87	2	2	4.87	2	4	4.87	2	4	8.32	3	7	2.2	1	2	2.2	1	2
Q3KQU3	MAP7 domain-containing protein 1 OS=Homo sapiens GN=MAP7D1 PE=1 SV=1 - [MA7D1_HUMAN]	8.32	1	6	6	43	6.3	5	9	6.06	4	8	6.3	5	6	8.09	5	6	6.66	5	9	4.99	3	5
Q9Y3A2	Probable U3 small nucleolar RNA-associated protein 11 OS=Homo sapiens GN=UTP11L PE=1 SV=2 - [UTP11_HUMAN]	8.3	1	2	2	7	3.95	1	1	4.35	1	2	4.35	1	1				8.3	2	2	4.35	1	1
Q5TFQ8	Signal-regulatory protein beta-1 isoform 3 OS=Homo sapiens GN=SIRPB1 PE=1 SV=1 - [SIRBL_HUMAN]	8.29	2	2	2	13	8.29	2	3	8.29	2	3	8.29	2	2	8.29	2	2	4.77	1	1	4.77	1	2
Q9NZL4	Hsp70-binding protein 1 OS=Homo sapiens GN=HSPBP1 PE=1 SV=1 - [HPBP1_HUMAN]	8.29	1	2	2	13	4.42	1	2	4.42	1	2	4.42	1	2	4.42	1	2	8.29	2	4	4.42	1	1
Q9Y5Z4	Heme-binding protein 2 OS=Homo sapiens GN=HEBP2 PE=1 SV=1 - [HEBP2_HUMAN]	8.29	1	1	1	1													8.29	1	1
Q9Y4P3	Transducin beta-like protein 2 OS=Homo sapiens GN=TBL2 PE=1 SV=1 - [TBL2_HUMAN]	8.28	1	2	2	10	2.91	1	1				8.28	2	2	8.28	2	2	8.28	2	2	8.28	2	3
O95684	FGFR1 oncogene partner OS=Homo sapiens GN=FGFR1OP PE=1 SV=1 - [FR1OP_HUMAN]	8.27	1	2	2	2										5.51	1	1	2.76	1	1
P54725	UV excision repair protein RAD23 homolog A OS=Homo sapiens GN=RAD23A PE=1 SV=1 - [RD23A_HUMAN]	8.26	1	1	1	2	8.26	1	1				8.26	1	1
P62140	Serine/threonine-protein phosphatase PP1-beta catalytic subunit OS=Homo sapiens GN=PPP1CB PE=1 SV=3 - [PP1B_HUMAN]	8.26	1	1	3	21	8.26	2	3	8.26	2	2	4.59	1	1	8.26	3	9	8.26	2	3	8.26	2	3
P55060	Exportin-2 OS=Homo sapiens GN=CSE1L PE=1 SV=3 - [XPO2_HUMAN]	8.24	1	5	5	34	8.24	4	6	4.43	4	4	8.24	4	8	8.24	5	6	8.24	4	6	4.43	3	4
P36776	Lon protease homolog, mitochondrial OS=Homo sapiens GN=LONP1 PE=1 SV=2 - [LONM_HUMAN]	8.24	1	4	4	9	1.77	1	1	1.77	1	1	8.24	4	4	1.77	1	1	1.77	1	1	1.77	1	1
Q969V5	Mitochondrial ubiquitin ligase activator of NFKB 1 OS=Homo sapiens GN=MUL1 PE=1 SV=1 - [MUL1_HUMAN]	8.24	1	1	1	1																8.24	1	1
O14980	Exportin-1 OS=Homo sapiens GN=XPO1 PE=1 SV=1 - [XPO1_HUMAN]	8.22	1	4	4	24	1.77	1	5	1.77	1	3	8.22	4	8	1.77	1	4	1.77	1	2	1.77	1	2
Q5QJE6	Deoxynucleotidyltransferase terminal-interacting protein 2 OS=Homo sapiens GN=DNTTIP2 PE=1 SV=2 - [TDIF2_HUMAN]	8.2	1	4	4	12	4.23	2	3	5.69	3	3	1.72	1	1	1.72	1	2	4.23	2	2	1.72	1	1
Q5J8M3	ER membrane protein complex subunit 4 OS=Homo sapiens GN=EMC4 PE=1 SV=2 - [EMC4_HUMAN]	8.2	1	1	1	7				8.2	1	3	8.2	1	1							8.2	1	3
Q9UEU0	Vesicle transport through interaction with t-SNAREs homolog 1B OS=Homo sapiens GN=VTI1B PE=1 SV=3 - [VTI1B_HUMAN]	8.19	1	2	2	2	8.19	1	1							5.17	1	1
Q9Y679	Ancient ubiquitous protein 1 OS=Homo sapiens GN=AUP1 PE=1 SV=1 - [AUP1_HUMAN]	8.19	1	2	2	9	1.89	1	2	1.89	1	1	1.89	1	1	8.19	2	2	1.89	1	2	1.89	1	1
Q01970	1-phosphatidylinositol 4,5-bisphosphate phosphodiesterase beta-3 OS=Homo sapiens GN=PLCB3 PE=1 SV=2 - [PLCB3_HUMAN]	8.18	1	8	8	39	5.92	4	6	4.13	5	7	5.92	4	6	6.73	5	5	4.86	5	7	4.86	5	8
Q86WR0	Coiled-coil domain-containing protein 25 OS=Homo sapiens GN=CCDC25 PE=1 SV=2 - [CCD25_HUMAN]	8.17	1	1	1	1										8.17	1	1
Q8NC56	LEM domain-containing protein 2 OS=Homo sapiens GN=LEMD2 PE=1 SV=1 - [LEMD2_HUMAN]	8.15	1	2	2	4										8.15	2	3				1.39	1	1
P15927	Replication protein A 32 kDa subunit OS=Homo sapiens GN=RPA2 PE=1 SV=1 - [RFA2_HUMAN]	8.15	1	1	1	2													8.15	1	2
Q3ZCW2	Galectin-related protein OS=Homo sapiens GN=LGALSL PE=1 SV=2 - [LEGL_HUMAN]	8.14	1	1	1	1										8.14	1	1
Q16401	26S proteasome non-ATPase regulatory subunit 5 OS=Homo sapiens GN=PSMD5 PE=1 SV=3 - [PSMD5_HUMAN]	8.13	1	2	2	20	4.37	1	4	4.37	1	5	4.37	1	3	8.13	2	5	4.37	1	2	4.37	1	1
Q9BXB5	Oxysterol-binding protein-related protein 10 OS=Homo sapiens GN=OSBPL10 PE=1 SV=2 - [OSB10_HUMAN]	8.12	1	2	2	2				3.8	1	1	4.32	1	1
Q14692	Ribosome biogenesis protein BMS1 homolog OS=Homo sapiens GN=BMS1 PE=1 SV=1 - [BMS1_HUMAN]	8.11	1	7	7	27	2.26	2	4	2.26	2	3	5.69	5	7	5.77	5	6	2.34	2	3	3.35	3	4
Q9Y3E7	Charged multivesicular body protein 3 OS=Homo sapiens GN=CHMP3 PE=1 SV=3 - [CHMP3_HUMAN]	8.11	1	1	1	3							8.11	1	1				8.11	1	1	8.11	1	1
Q9NV06	DDB1- and CUL4-associated factor 13 OS=Homo sapiens GN=DCAF13 PE=1 SV=2 - [DCA13_HUMAN]	8.09	1	3	3	21	8.09	3	5	3.82	1	1	8.09	3	5	8.09	3	4	6.07	2	3	6.07	2	3
Q6Y7W6	PERQ amino acid-rich with GYF domain-containing protein 2 OS=Homo sapiens GN=GIGYF2 PE=1 SV=1 - [PERQ2_HUMAN]	8.08	1	6	7	24	2.23	3	5	0.92	1	2	5.31	4	6	3.93	4	7	0.92	1	1	2.39	2	3
Q96JN0	Ligand-dependent corepressor OS=Homo sapiens GN=LCOR PE=1 SV=2 - [LCOR_HUMAN]	8.08	1	1	1	1																8.08	1	1
O94760	N(G),N(G)-dimethylarginine dimethylaminohydrolase 1 OS=Homo sapiens GN=DDAH1 PE=1 SV=3 - [DDAH1_HUMAN]	8.07	1	2	2	5							4.21	1	2				8.07	2	2	4.21	1	1
Q9BV19	Uncharacterized protein C1orf50 OS=Homo sapiens GN=C1orf50 PE=1 SV=2 - [CA050_HUMAN]	8.04	1	1	1	3	8.04	1	1	8.04	1	1	8.04	1	1
O75792	Ribonuclease H2 subunit A OS=Homo sapiens GN=RNASEH2A PE=1 SV=2 - [RNH2A_HUMAN]	8.03	1	2	2	9	8.03	2	2	8.03	2	2	5.02	1	2	5.02	1	1	5.02	1	1	5.02	1	1
P15559	NAD(P)H dehydrogenase [quinone] 1 OS=Homo sapiens GN=NQO1 PE=1 SV=1 - [NQO1_HUMAN]	8.03	1	2	2	16	8.03	2	4	4.38	1	2	4.38	1	1	8.03	2	2	8.03	2	3	8.03	2	4
Q02241	Kinesin-like protein KIF23 OS=Homo sapiens GN=KIF23 PE=1 SV=3 - [KIF23_HUMAN]	8.02	1	3	4	19	2.29	1	2	2.92	2	3	6.04	2	4	3.65	2	3	2.29	1	5	3.65	2	2
Q13895	Bystin OS=Homo sapiens GN=BYSL PE=1 SV=3 - [BYST_HUMAN]	8.01	1	3	3	13	5.03	1	1	5.03	1	1	5.03	2	2	5.03	1	2	8.01	3	5	5.03	1	2
Q9Y2J2	Band 4.1-like protein 3 OS=Homo sapiens GN=EPB41L3 PE=1 SV=2 - [E41L3_HUMAN]	8	2	7	8	37	4.42	4	5	4.42	4	5	5.98	6	8	6.44	6	8	4.42	3	7	4.42	3	4
Q07820	Induced myeloid leukemia cell differentiation protein Mcl-1 OS=Homo sapiens GN=MCL1 PE=1 SV=3 - [MCL1_HUMAN]	8	1	1	1	1																8	1	1
Q8NCW5	NAD(P)H-hydrate epimerase OS=Homo sapiens GN=APOA1BP PE=1 SV=2 - [NNRE_HUMAN]	7.99	1	1	1	9	7.99	1	2	7.99	1	1	7.99	1	1	7.99	1	2	7.99	1	1	7.99	1	2
Q9Y2Y0	ADP-ribosylation factor-like protein 2-binding protein OS=Homo sapiens GN=ARL2BP PE=1 SV=1 - [AR2BP_HUMAN]	7.98	1	1	1	7	7.98	1	2	7.98	1	1	7.98	1	1	7.98	1	1	7.98	1	1	7.98	1	1
Q9NZT2	Opioid growth factor receptor OS=Homo sapiens GN=OGFR PE=1 SV=3 - [OGFR_HUMAN]	7.98	1	3	3	19	5.47	2	2	5.47	2	3	7.98	3	4	7.98	3	5	5.47	2	2	5.47	2	3
O75533	Splicing factor 3B subunit 1 OS=Homo sapiens GN=SF3B1 PE=1 SV=3 - [SF3B1_HUMAN]	7.98	1	9	9	34	1.07	1	1	3.37	3	3	2.84	3	5	6.21	6	11	7.98	8	9	4.52	5	5
Q9BZ67	FERM domain-containing protein 8 OS=Homo sapiens GN=FRMD8 PE=1 SV=1 - [FRMD8_HUMAN]	7.97	1	2	2	3				4.53	1	1	3.45	1	1	4.53	1	1
Q9UBF6	RING-box protein 2 OS=Homo sapiens GN=RNF7 PE=1 SV=1 - [RBX2_HUMAN]	7.96	1	1	1	4	7.96	1	1				7.96	1	1	7.96	1	1	7.96	1	1
O75157	TSC22 domain family protein 2 OS=Homo sapiens GN=TSC22D2 PE=1 SV=3 - [T22D2_HUMAN]	7.95	1	2	2	9	1.54	1	1	6.41	1	2				1.54	1	2	6.41	1	3	6.41	1	1
Q9BU89	Deoxyhypusine hydroxylase OS=Homo sapiens GN=DOHH PE=1 SV=1 - [DOHH_HUMAN]	7.95	1	1	1	1										7.95	1	1
Q9NRX1	RNA-binding protein PNO1 OS=Homo sapiens GN=PNO1 PE=1 SV=1 - [PNO1_HUMAN]	7.94	1	1	1	11	7.94	1	2	7.94	1	2	7.94	1	1	7.94	1	1	7.94	1	3	7.94	1	2
Q5JTH9	RRP12-like protein OS=Homo sapiens GN=RRP12 PE=1 SV=2 - [RRP12_HUMAN]	7.94	1	7	7	33	3.55	4	7	5.78	4	4	4.16	4	5	6.25	6	9	5.01	4	4	3.62	3	4
Q96RT1	Protein LAP2 OS=Homo sapiens GN=ERBB2IP PE=1 SV=2 - [LAP2_HUMAN]	7.93	1	7	7	27	3.26	2	4	1.35	1	1	3.26	2	5	6.59	6	7	3.26	2	3	3.26	2	7
Q7Z3B1	Neuronal growth regulator 1 OS=Homo sapiens GN=NEGR1 PE=1 SV=3 - [NEGR1_HUMAN]	7.91	1	2	2	6				2.26	1	1	5.65	1	1	7.91	2	2	2.26	1	2
P61923	Coatomer subunit zeta-1 OS=Homo sapiens GN=COPZ1 PE=1 SV=1 - [COPZ1_HUMAN]	7.91	1	1	1	2							7.91	1	2
O94842	TOX high mobility group box family member 4 OS=Homo sapiens GN=TOX4 PE=1 SV=1 - [TOX4_HUMAN]	7.89	1	3	3	30	5.8	2	5	7.89	3	4	5.8	2	5	7.89	3	11	5.8	2	3	5.8	2	2
Q99614	Tetratricopeptide repeat protein 1 OS=Homo sapiens GN=TTC1 PE=1 SV=1 - [TTC1_HUMAN]	7.88	1	2	2	29	7.88	2	5	7.88	2	4	7.88	2	4	7.88	2	5	7.88	2	4	7.88	2	7
P30419	Glycylpeptide N-tetradecanoyltransferase 1 OS=Homo sapiens GN=NMT1 PE=1 SV=2 - [NMT1_HUMAN]	7.86	1	3	3	12	6.25	2	2	2.42	1	1	6.65	2	2	6.65	2	2	2.42	1	3	6.65	2	2
Q96CP2	FLYWCH family member 2 OS=Homo sapiens GN=FLYWCH2 PE=1 SV=1 - [FWCH2_HUMAN]	7.86	1	1	1	5										7.86	1	1	7.86	1	4
Q6PIU2	Neutral cholesterol ester hydrolase 1 OS=Homo sapiens GN=NCEH1 PE=1 SV=3 - [NCEH1_HUMAN]	7.84	1	2	2	11	2.94	1	1	2.94	1	3	7.84	2	3	2.94	1	1	2.94	1	1	2.94	1	2
Q9UGP4	LIM domain-containing protein 1 OS=Homo sapiens GN=LIMD1 PE=1 SV=1 - [LIMD1_HUMAN]	7.84	1	3	3	11	5.77	2	2	3.4	1	2	3.4	1	1	5.47	2	3	3.4	1	3
O14639	Actin-binding LIM protein 1 OS=Homo sapiens GN=ABLIM1 PE=1 SV=3 - [ABLM1_HUMAN]	7.84	1	3	3	7				1.8	1	1	4.63	2	2	1.8	1	2	3.21	1	1	2.83	1	1
Q13405	39S ribosomal protein L49, mitochondrial OS=Homo sapiens GN=MRPL49 PE=1 SV=1 - [RM49_HUMAN]	7.83	1	1	1	8	7.83	1	1	7.83	1	3	7.83	1	1	7.83	1	1	7.83	1	1	7.83	1	1
P30154	Serine/threonine-protein phosphatase 2A 65 kDa regulatory subunit A beta isoform OS=Homo sapiens GN=PPP2R1B PE=1 SV=3 - [2AAB_HUMAN]	7.82	1	1	5	43	7.82	5	7	5.82	3	7	7.82	5	9	7.82	5	5	7.82	5	7	7.82	5	8
Q9UQE7	Structural maintenance of chromosomes protein 3 OS=Homo sapiens GN=SMC3 PE=1 SV=2 - [SMC3_HUMAN]	7.81	1	7	7	51	6.57	6	10	5.09	5	6	5.09	5	9	5.51	5	8	5.09	5	10	5.09	5	8
Q8N1F7	Nuclear pore complex protein Nup93 OS=Homo sapiens GN=NUP93 PE=1 SV=2 - [NUP93_HUMAN]	7.81	1	4	4	32	7.81	4	7	4.03	3	3	7.57	3	5	7.81	4	5	7.81	4	8	7.81	4	4
Q9H2P0	Activity-dependent neuroprotector homeobox protein OS=Homo sapiens GN=ADNP PE=1 SV=1 - [ADNP_HUMAN]	7.8	1	7	7	39	5.54	4	10	3.72	3	3	4.36	4	6	5.44	4	8	4.17	3	6	5.54	4	6
Q9H1C0	Lysophosphatidic acid receptor 5 OS=Homo sapiens GN=LPAR5 PE=2 SV=1 - [LPAR5_HUMAN]	7.8	1	1	1	1																7.8	1	1
Q8WXD5	Gem-associated protein 6 OS=Homo sapiens GN=GEMIN6 PE=1 SV=1 - [GEMI6_HUMAN]	7.78	1	1	1	3	7.78	1	1	7.78	1	1				7.78	1	1
P57740	Nuclear pore complex protein Nup107 OS=Homo sapiens GN=NUP107 PE=1 SV=1 - [NU107_HUMAN]	7.78	1	5	5	41	4	3	6	4	3	7	7.14	4	9	6.16	4	8	4.97	3	5	5.51	3	6
Q8IY57	YY1-associated factor 2 OS=Homo sapiens GN=YAF2 PE=1 SV=3 - [YAF2_HUMAN]	7.78	1	1	1	1										7.78	1	1
Q9H2U2	Inorganic pyrophosphatase 2, mitochondrial OS=Homo sapiens GN=PPA2 PE=1 SV=2 - [IPYR2_HUMAN]	7.78	1	1	1	1													7.78	1	1
P08493	Matrix Gla protein OS=Homo sapiens GN=MGP PE=1 SV=2 - [MGP_HUMAN]	7.77	1	1	1	1																7.77	1	1
P40121	Macrophage-capping protein OS=Homo sapiens GN=CAPG PE=1 SV=2 - [CAPG_HUMAN]	7.76	1	3	3	9	3.74	1	2	3.74	1	1	6.9	2	2	7.76	2	2	3.74	1	1	3.74	1	1
Q9HCN4	GPN-loop GTPase 1 OS=Homo sapiens GN=GPN1 PE=1 SV=1 - [GPN1_HUMAN]	7.75	1	1	1	1													7.75	1	1
P05230	Fibroblast growth factor 1 OS=Homo sapiens GN=FGF1 PE=1 SV=1 - [FGF1_HUMAN]	7.74	1	1	1	22	7.74	1	4	7.74	1	2	7.74	1	3	7.74	1	5	7.74	1	5	7.74	1	3
Q96RN5	Mediator of RNA polymerase II transcription subunit 15 OS=Homo sapiens GN=MED15 PE=1 SV=2 - [MED15_HUMAN]	7.74	1	3	3	8	2.79	1	1	2.79	1	2	7.74	3	3	2.79	1	1				2.79	1	1
P31350	Ribonucleoside-diphosphate reductase subunit M2 OS=Homo sapiens GN=RRM2 PE=1 SV=1 - [RIR2_HUMAN]	7.71	1	4	4	14	7.71	2	2	3.08	1	1	7.71	3	3	7.2	2	2	7.71	4	4	3.08	2	2
Q86XZ4	Spermatogenesis-associated serine-rich protein 2 OS=Homo sapiens GN=SPATS2 PE=1 SV=1 - [SPAS2_HUMAN]	7.71	1	3	3	11	3.3	1	1	3.3	1	1	5.14	2	3	5.14	2	2	3.3	1	1	5.87	2	3
Q9UNM6	26S proteasome non-ATPase regulatory subunit 13 OS=Homo sapiens GN=PSMD13 PE=1 SV=2 - [PSD13_HUMAN]	7.71	1	2	2	11	3.99	1	2	3.99	1	2	3.99	1	2	3.99	1	1	7.71	2	3	3.99	1	1
Q9UKP6	Urotensin-2 receptor OS=Homo sapiens GN=UTS2R PE=1 SV=1 - [UR2R_HUMAN]	7.71	1	1	1	1																7.71	1	1
Q8N8R7	ARL14 effector protein OS=Homo sapiens GN=ARL14EP PE=1 SV=1 - [AL14E_HUMAN]	7.69	1	1	1	1													7.69	1	1
P08240	Signal recognition particle receptor subunit alpha OS=Homo sapiens GN=SRPR PE=1 SV=2 - [SRPR_HUMAN]	7.68	1	3	3	5				0.94	1	1				2.82	2	2	5.8	2	2
P04439	HLA class I histocompatibility antigen, A-3 alpha chain OS=Homo sapiens GN=HLA-A PE=1 SV=2 - [1A03_HUMAN]	7.67	18	1	2	16	7.67	2	2	3.01	1	2	7.67	2	3	7.67	2	4	7.67	2	3	7.67	2	2
Q05048	Cleavage stimulation factor subunit 1 OS=Homo sapiens GN=CSTF1 PE=1 SV=1 - [CSTF1_HUMAN]	7.66	1	2	2	3				4.87	1	1	2.78	1	1				4.87	1	1
Q9UHY7	Enolase-phosphatase E1 OS=Homo sapiens GN=ENOPH1 PE=1 SV=1 - [ENOPH_HUMAN]	7.66	1	1	1	2										7.66	1	2
Q9Y697	Cysteine desulfurase, mitochondrial OS=Homo sapiens GN=NFS1 PE=1 SV=3 - [NFS1_HUMAN]	7.66	1	2	2	2										3.5	1	1	4.16	1	1
Q8WTT2	Nucleolar complex protein 3 homolog OS=Homo sapiens GN=NOC3L PE=1 SV=1 - [NOC3L_HUMAN]	7.63	1	6	6	27	7.63	5	6	3.5	3	5	5.75	3	4	4.88	4	4	6.25	5	5	3.5	2	3
O15066	Kinesin-like protein KIF3B OS=Homo sapiens GN=KIF3B PE=1 SV=1 - [KIF3B_HUMAN]	7.63	1	3	3	25	2.68	1	1	2.68	1	4	4.69	2	4	2.68	1	2	2.68	1	8	5.62	2	6
Q9UNK0	Syntaxin-8 OS=Homo sapiens GN=STX8 PE=1 SV=2 - [STX8_HUMAN]	7.63	1	1	1	1							7.63	1	1
Q10713	Mitochondrial-processing peptidase subunit alpha OS=Homo sapiens GN=PMPCA PE=1 SV=2 - [MPPA_HUMAN]	7.62	1	4	4	32	2.1	1	5	2.48	2	5	4	2	7	7.62	4	6	5.33	2	6	2.48	2	3
Q9BU61	NADH dehydrogenase [ubiquinone] 1 alpha subcomplex assembly factor 3 OS=Homo sapiens GN=NDUFAF3 PE=1 SV=1 - [NDUF3_HUMAN]	7.61	1	1	1	8				7.61	1	1				7.61	1	4	7.61	1	2	7.61	1	1
Q96EK6	Glucosamine 6-phosphate N-acetyltransferase OS=Homo sapiens GN=GNPNAT1 PE=1 SV=1 - [GNA1_HUMAN]	7.61	1	1	1	1																7.61	1	1
O00625	Pirin OS=Homo sapiens GN=PIR PE=1 SV=1 - [PIR_HUMAN]	7.59	1	1	1	4				7.59	1	1				7.59	1	1	7.59	1	2
Q15027	Arf-GAP with coiled-coil, ANK repeat and PH domain-containing protein 1 OS=Homo sapiens GN=ACAP1 PE=1 SV=1 - [ACAP1_HUMAN]	7.57	1	1	2	13	2.16	1	2	2.16	1	2	2.16	1	2	7.57	2	2	2.16	1	2	2.16	1	3
Q96G21	U3 small nucleolar ribonucleoprotein protein IMP4 OS=Homo sapiens GN=IMP4 PE=1 SV=1 - [IMP4_HUMAN]	7.56	1	2	2	9	4.81	1	1	7.56	2	2	7.56	2	2				7.56	2	3	4.81	1	1
Q9UK33	Zinc finger protein 580 OS=Homo sapiens GN=ZNF580 PE=1 SV=1 - [ZN580_HUMAN]	7.56	1	1	1	6	7.56	1	1				7.56	1	1	7.56	1	2	7.56	1	2
Q9UBB5	Methyl-CpG-binding domain protein 2 OS=Homo sapiens GN=MBD2 PE=1 SV=1 - [MBD2_HUMAN]	7.54	1	2	2	17	7.54	2	2	4.14	1	2	7.54	2	4	7.54	2	3	7.54	2	2	7.54	2	4
Q9UKN8	General transcription factor 3C polypeptide 4 OS=Homo sapiens GN=GTF3C4 PE=1 SV=2 - [TF3C4_HUMAN]	7.54	1	2	2	7	4.87	1	2				7.54	2	3	2.68	1	1	4.87	1	1
Q75N03	E3 ubiquitin-protein ligase Hakai OS=Homo sapiens GN=CBLL1 PE=1 SV=1 - [HAKAI_HUMAN]	7.54	1	2	2	2										2.85	1	1	4.68	1	1
Q9Y4W6	AFG3-like protein 2 OS=Homo sapiens GN=AFG3L2 PE=1 SV=2 - [AFG32_HUMAN]	7.53	1	3	3	20	7.53	3	3	7.53	3	4	7.53	3	3	7.53	3	4	5.52	2	2	7.53	3	4
Q14677	Clathrin interactor 1 OS=Homo sapiens GN=CLINT1 PE=1 SV=1 - [EPN4_HUMAN]	7.52	1	4	4	22	1.28	1	3	3.36	2	3	3.2	2	2	5.44	3	5	5.6	3	6	3.52	2	3
Q13418	Integrin-linked protein kinase OS=Homo sapiens GN=ILK PE=1 SV=2 - [ILK_HUMAN]	7.52	1	3	3	16	5.31	2	4	5.31	2	3	5.31	2	2	7.52	3	4	5.31	2	2	3.1	1	1
O43237	Cytoplasmic dynein 1 light intermediate chain 2 OS=Homo sapiens GN=DYNC1LI2 PE=1 SV=1 - [DC1L2_HUMAN]	7.52	1	1	1	2													7.52	1	2
Q9Y5K6	CD2-associated protein OS=Homo sapiens GN=CD2AP PE=1 SV=1 - [CD2AP_HUMAN]	7.51	1	5	5	19	5.63	3	4	4.07	2	2	4.07	2	2	5.95	4	5	4.07	2	4	4.07	2	2
Q9Y5P6	Mannose-1-phosphate guanyltransferase beta OS=Homo sapiens GN=GMPPB PE=1 SV=2 - [GMPPB_HUMAN]	7.5	1	1	1	4				7.5	1	1	7.5	1	1	7.5	1	1				7.5	1	1
O95149	Snurportin-1 OS=Homo sapiens GN=SNUPN PE=1 SV=1 - [SPN1_HUMAN]	7.5	1	1	1	2							7.5	1	2
P26358	DNA (cytosine-5)-methyltransferase 1 OS=Homo sapiens GN=DNMT1 PE=1 SV=2 - [DNMT1_HUMAN]	7.49	1	7	7	15	0.5	1	1	0.93	1	2	4.89	4	5	2.1	2	2	1.79	2	3	2.04	2	2
Q9P0V9	Septin-10 OS=Homo sapiens GN=SEPT10 PE=1 SV=2 - [SEP10_HUMAN]	7.49	1	1	3	3										7.05	2	2	4.63	1	1
Q16222	UDP-N-acetylhexosamine pyrophosphorylase OS=Homo sapiens GN=UAP1 PE=1 SV=3 - [UAP1_HUMAN]	7.47	1	3	3	12	3.26	1	1	3.26	1	1	5.17	2	4	7.47	3	3	3.26	1	1	1.92	1	2
O95861	3'(2'),5'-bisphosphate nucleotidase 1 OS=Homo sapiens GN=BPNT1 PE=1 SV=1 - [BPNT1_HUMAN]	7.47	1	1	1	1																7.47	1	1
Q13423	NAD(P) transhydrogenase, mitochondrial OS=Homo sapiens GN=NNT PE=1 SV=3 - [NNTM_HUMAN]	7.46	1	7	7	21	3.59	3	5	2.49	2	3	4.24	3	4	3.41	3	3	2.85	3	4	2.58	2	2
Q8NEF9	Serum response factor-binding protein 1 OS=Homo sapiens GN=SRFBP1 PE=1 SV=1 - [SRFB1_HUMAN]	7.46	1	2	2	11	4.2	1	1	4.2	1	1	4.2	1	1	4.2	1	1	7.46	2	4	7.46	2	3
P30038	Delta-1-pyrroline-5-carboxylate dehydrogenase, mitochondrial OS=Homo sapiens GN=ALDH4A1 PE=1 SV=3 - [AL4A1_HUMAN]	7.46	1	2	2	8	4.62	1	2				2.84	1	1	2.84	1	3	2.84	1	1	2.84	1	1
Q9HCC0	Methylcrotonoyl-CoA carboxylase beta chain, mitochondrial OS=Homo sapiens GN=MCCC2 PE=1 SV=1 - [MCCB_HUMAN]	7.46	1	3	3	9	1.6	1	1							5.86	2	5	5.15	2	2	1.6	1	1
P82970	High mobility group nucleosome-binding domain-containing protein 5 OS=Homo sapiens GN=HMGN5 PE=1 SV=1 - [HMGN5_HUMAN]	7.45	1	2	2	17	5.32	1	2	7.45	2	3	7.45	2	2	7.45	2	4	5.32	1	3	7.45	2	3
Q9NVT9	Armadillo repeat-containing protein 1 OS=Homo sapiens GN=ARMC1 PE=1 SV=1 - [ARMC1_HUMAN]	7.45	1	1	1	8				7.45	1	2	7.45	1	2	7.45	1	1	7.45	1	1	7.45	1	2
P56192	Methionine--tRNA ligase, cytoplasmic OS=Homo sapiens GN=MARS PE=1 SV=2 - [SYMC_HUMAN]	7.44	1	5	5	38	5.22	3	5	5.22	3	5	7.44	5	9	5.22	4	6	7.44	5	7	5.22	4	6
P28300	Protein-lysine 6-oxidase OS=Homo sapiens GN=LOX PE=1 SV=2 - [LYOX_HUMAN]	7.43	1	2	2	8	4.8	1	3							7.43	2	3	4.8	1	1	4.8	1	1
Q9Y5X3	Sorting nexin-5 OS=Homo sapiens GN=SNX5 PE=1 SV=1 - [SNX5_HUMAN]	7.43	1	2	2	18	7.43	2	5	7.43	2	3	7.43	2	2	7.43	2	3	7.43	2	3	7.43	2	2
O60895	Receptor activity-modifying protein 2 OS=Homo sapiens GN=RAMP2 PE=1 SV=2 - [RAMP2_HUMAN]	7.43	1	1	1	3	7.43	1	2				7.43	1	1
O43181	NADH dehydrogenase [ubiquinone] iron-sulfur protein 4, mitochondrial OS=Homo sapiens GN=NDUFS4 PE=1 SV=1 - [NDUS4_HUMAN]	7.43	1	2	2	18	6.29	1	4	6.29	1	1	7.43	2	6	7.43	2	3	7.43	2	2	7.43	2	2
Q8NEY8	Periphilin-1 OS=Homo sapiens GN=PPHLN1 PE=1 SV=2 - [PPHLN_HUMAN]	7.42	1	3	3	14	5.02	2	3	5.02	2	2	1.97	1	1	7.42	3	3	5.02	2	3	5.02	2	2
Q9NSI2	Protein FAM207A OS=Homo sapiens GN=FAM207A PE=1 SV=2 - [F207A_HUMAN]	7.39	1	1	1	10	7.39	1	1	7.39	1	1	7.39	1	2	7.39	1	1	7.39	1	3	7.39	1	2
Q92567	Protein FAM168A OS=Homo sapiens GN=FAM168A PE=1 SV=2 - [F168A_HUMAN]	7.38	1	1	1	3										7.38	1	1	7.38	1	1	7.38	1	1
Q96AC1	Fermitin family homolog 2 OS=Homo sapiens GN=FERMT2 PE=1 SV=1 - [FERM2_HUMAN]	7.35	1	3	3	8							1.76	1	2	7.35	3	4	1.76	1	1	1.76	1	1
Q7L5N1	COP9 signalosome complex subunit 6 OS=Homo sapiens GN=COPS6 PE=1 SV=1 - [CSN6_HUMAN]	7.34	1	1	1	2										7.34	1	2
P17480	Nucleolar transcription factor 1 OS=Homo sapiens GN=UBTF PE=1 SV=1 - [UBF1_HUMAN]	7.33	1	5	5	19	2.49	2	3	1.7	1	1	6.54	3	5	6.54	4	5	2.36	1	2	4.06	2	3
[truncated: 1,566 more rows]

## Sheet: Peptides
Sequence	# PSMs	Protein Group Accessions	Modifications	MH+ [Da]	XCorr Induced1	XCorr Induced2	XCorr Induced3	XCorr Uninduced1	XCorr Uninduced2	XCorr Uninduced3	# Missed Cleavages
FQSSAVMALQEASEAYLVGLFEDTNLCAIHAK	27	Q71DI3	M7(Oxidation); C27(Carbamidomethyl)	3529.69	8.60556	7.16849	8.07183	8.28905	6.14948	7.52731	0
FQSAAIGALQEASEAYLVGLFEDTNLCAIHAK	21	P84243	C27(Carbamidomethyl)	3437.71	8.18283	8.42779	6.39386	8.2867	7.93558	8.13062	0
FQSSAVMALQEASEAYLVGLFEDTNLCAIHAK	98	Q71DI3	C27(Carbamidomethyl)	3513.7	8.06904	8.01415	8.30188	8.05674	8.43874	7.94044	0
HTGPGILSMANAGPNTNGSQFFICTAK	21	P62937	C24(Carbamidomethyl)	2791.33	8.06471	8.00825	7.76253	7.65215	7.59813	7.96508	0
VIHDNFGIVEGLMTTVHAITATQK	91	P04406		2595.36	7.76186	8.09781	7.82725	7.42914	7.69996	7.53681	0
FQSSAVMALQEACEAYLVGLFEDTNLCAIHAK	59	P68431	C13(Carbamidomethyl); C27(Carbamidomethyl)	3586.71	7.4216	7.04531	7.3541	7.57418	7.83001	7.32635	0
IASLEVENQSLRGVVQELQQAISK	17	P29692		2639.44	7.31831	6.19057	6.4371	6.80198	5.58657	4.45649	1
VGATAAVYSAAILEYLTAEVLELAGNASKDLK	27	P0C0S5;Q71UI9		3251.74	7.24386	7.65288	6.42686	6.73502	6.79479	7.26484	1
TTSGYAGGLSSAYGGLTSPGLSYSLGSSFGSGAGSSSFSR	32	P05787		3725.73	7.15058	6.31553	6.17525	6.25122	5.86576	6.46579	0
ALANSLACQGKYTPSGQAGAAASESLFVSNHAY	435	P04075	C8(Carbamidomethyl)	3341.58	7.10234	6.54739	7.46208	7.07448	7.32486	7.25024	1
ALEQQVEEMKTQLEELEDELQATEDAK	6	P35579		3147.49	7.09045	7.54569	6.74859	7.17556	7.70181		1
HQGVMVGMGQKDSYVGDEAQSK	76	P68133;P68032;P60709;P63261		2351.08	7.05007	7.00568	6.97969	6.545	7.22664	6.73856	1
IQASTMAFKQMEQISQFLQAAER	21	P37802		2656.31	7.04679	1.04405	6.57528	6.6069		5.69903	1
SLGSVQAPSYGARPVSSAASVYAGAGGSGSR	56	P05783		2854.4	7.01002	6.26325	5.86296	5.99853	6.06641	6.62564	0
LTLYDIAHTPGVAADLSHIETK	30	P40926		2365.24	6.96464	5.99199	5.86678	6.831	6.67399	6.66925	0
DLGEELEALKTELEDTLDSTAAQQELR	15	P35579		3017.47	6.93175		6.96761	7.23566	7.02059	7.32595	1
GLVAVITGGASGLGLATAERLVGQGASAVLLDLPNSGGEAQAK	9	Q99714		3989.19	6.82577	5.06523	5.43356	5.27294	6.1408		1
EAESCDCLQGFQLTHSLGGGTGSGMGTLLISK	28	P07437;P04350;P68371	C5(Carbamidomethyl); C7(Carbamidomethyl)	3311.54	6.7818	5.16616	6.03206	5.58296	5.95627	6.76017	0
SGPFGQIFRPDNFVFGQSGAGNNWAK	29	Q13885;Q9BVA1;P04350;P68371;P07437		2798.34	6.76248	7.03003	7.20177	8.14042	6.93165	6.56877	0
INALTAASEAACLIVSVDETIKNPR	30	Q99832	C12(Carbamidomethyl)	2656.39	6.7614	6.39373	6.67492	6.22975	5.9124	6.72422	1
LLDFGSLSNLQVTQPTVGMNFKTPR	47	P08708		2763.45	6.74448	6.78968	6.73584	7.29327	6.76167	6.94356	1
NAGVEGSLIVEKIMQSSSEVGYDAMAGDFVNMVEK	25	P10809		3704.75	6.70807	2.88368	6.30781	4.58082	5.93877	6.24965	1
IAAQGFTVAAILLGLAVTAMKSRP	9	Q9BW72		2399.38	6.66219	6.21294	6.42827	6.44047	5.49538	6.29328	1
GVFEVKSTNGDTFLGGEDFDQALLR	14	P38646		2715.33	6.65316	6.01459	5.27363	5.67608	5.39695	4.82363	1
KYTLPPGVDPTQVSSSLSPEGTLTVEAPMPK	57	P04792		3226.66	6.64759	6.29075	6.61441	6.14157	6.94022	7.27464	1
VGAGAPVYLAAVLEYLTAEILELAGNAARDNK	12	Q93077;Q96KK5;Q8IUE6;P16104;P20671		3272.74	6.64282	5.29631	4.54919	5.75621	6.76945	6.16399	1
LLADPTGAFGKETDLLLDDSLVSIFGNR	8	P30044		2977.55	6.62405		5.57662	5.92647	5.86159	5.66212	1
WLKGQGVYLGMPGCLPVYDALAGEFIR	10	P30040	C14(Carbamidomethyl)	3010.52	6.6239	5.68734	5.28155	5.26412	6.64024	5.79409	1
MNNSGADEIGKLFVGGLDWSTTQETLR	4	Q96EP5	N-Term(Acetyl)	2981.44	6.5998		3.59147	7.16124	2.91633		1
CAQGCICKGASDKCSCCA	49	P02795	C1(Carbamidomethyl); C5(Carbamidomethyl); C7(Carbamidomethyl); C14(Carbamidomethyl); C16(Carbamidomethyl); C17(Carbamidomethyl)	2092.79	6.55439	6.77688	6.67698	6.4781	6.63459	6.77237	2
LIGDAAKNQVAMNPTNTVFDAK	53	P11142		2318.17	6.544	6.29859	6.248	5.7093	6.53679	6.59813	1
NIVEAAAVRDISEASVFDAYVLPKLYVK	9	P62854		3080.67	6.53287	5.88545	5.29285	6.80843	4.39359	3.62487	2
LTVTSLQETGLKVNQPASFAVQLNGAR	7	Q14315		2842.55	6.50735	6.38905	5.69192	6.55317	5.59523	6.07867	1
SATKVTADVINAAEKLQVVGR	20	O43175		2170.22	6.45112	5.13321	5.54478	5.16962	6.35983	6.10928	2
NLDSLEEDLDFLRDQFTTTEVNMAR	6	P61758		2972.39	6.44341	6.15265	6.0702	6.3413	7.12628	6.29616	1
AISSSAISKAVSGASAGDYSDAIETLLTAIAVIK	7	Q8N684		3280.74	6.43624	3.78548	6.60357	5.67939	5.50982	4.49756	1
MDTEGFGELLQQAEQLAAETEGISELPHVER	11	Q8N1F7	N-Term(Acetyl)	3469.64	6.4277		5.54924	4.58895	6.50749	5.41433	0
QVLLSAAEAAEVILRVDNIIK	13	P78371		2265.31	6.42313	5.7927	5.42766	5.69697	6.17066	5.98088	1
VEILANDQGNRTTPSYVAFTDTER	60	P08107;P11142		2697.32	6.41622	5.54909	6.02102	6.57197	6.20343	5.82832	1
LSWLDGSGLGFSLEYPTISLHALSR	10	P54105		2719.4	6.40968	5.31759	5.99287	5.65599	6.62824	4.74892	0
VGATAAVYSAAILEYLTAEVLELAGNASK	33	P0C0S5;Q71UI9		2895.53	6.40562	5.25952	5.04997	6.57461	7.10485	6.2473	0
HAVSEGTKAVTKYTSAK	84	O60814		1777.94	6.38986	6.62264	6.78414	6.4354	6.06103	6.18555	2
AVSDASAGDYGSAIETLVTAISLIKQSK	9	Q16630		2795.47	6.384		5.75642	5.88214	5.87117	4.31456	1
AATAPLLEAVDNLSAFASNPEFSSIPAQISPEGR	19	Q9Y490		3470.75	6.38359		5.88756	5.8022	6.22418	6.09665	0
FQSSAVMALQEACEAYLVGLFEDTNLCAIHAK	21	P68431	M7(Oxidation); C13(Carbamidomethyl); C27(Carbamidomethyl)	3602.7	6.38096	6.65003	7.77329	6.66415	7.563	6.34797	0
HQGVMVGMGQKDSYVGDEAQSKR	37	P68133;P68032;P60709;P63261		2507.17	6.37884	5.84755	6.74688	6.60108	7.06221	6.45084	2
LAALQGRLEGLGSSEADQDGLASTVR	16	Q07065		2614.34	6.36156	6.85509	6.0873	6.75837	6.57356	6.6031	1
VGAGAPVYMAAVLEYLTAEILELAGNAARDNK	10	Q6FI13		3290.72	6.34209	5.06039	3.82359	5.05578	4.24477	7.41455	1
GFGSFRFPSGNQGGAGPSQGSGGGTGGSVYTEDNDDDLYG	53	P55072		3871.65	6.33831	7.51769	5.22487	6.73272	6.98678	6.26009	1
IASLEVENQSLRGVVQELQQAISKLEAR	20	P29692		3108.7	6.27484	6.80508	6.17322	6.47281	6.65137	6.73279	2
HLQLAIRNDEELNKLLGK	34	P20671;Q96KK5;Q6FI13		2104.19	6.24807	5.45311	5.31891	6.26703	5.27956	5.97893	2
QKGADFLVTEVENGGSLGSKK	6	P14618		2164.12	6.24633	3.19507	4.43074	3.73348	4.4258	3.41742	2
CVLKIGEHTPSALAIMENANVLAR	23	P04075	C1(Carbamidomethyl)	2607.38	6.24551	7.31357	6.83005	6.59689	6.22065	7.03974	1
HAVSEGTKAVTKYTSSK	119	P23527;Q8N257		1793.93	6.24491	6.52527	6.36562	6.33283	6.7415	6.48211	2
YGINTTDIFQTVDLWEGKNMACVQR	23	P37802	C22(Carbamidomethyl)	2959.41	6.22858	5.62293	6.16224	6.67702	6.25001	6.53774	1
LMEPIYLVEIQCPEQVVGGIYGVLNR	48	P13639	C12(Carbamidomethyl)	2989.56	6.2105	3.24256	5.78324	6.57571	6.19229	4.61441	0
LIGDAAKNQVAMNPTNTVFDAKR	34	P11142		2474.28	6.19143	5.39668	5.68905	5.85947	6.05712	6.04679	2
VGAGAPVYLAAVLEYLTAEILELAGNAAR	44	Q93077;Q96KK5;Q8IUE6;P16104;P20671		2915.59	6.18985	5.80634	5.41091	6.17548	5.78621	6.58214	0
YMHSGPVVAMVWEGLNVVKTGR	14	P15531		2430.24	6.1878	5.26945	5.1631	4.96518	5.20453	4.4561	1
LIAPVAEEEATVPNNKITVVGVGQVGMACAISILGK	33	P07195	C29(Carbamidomethyl)	3648.98	6.18337	5.41009	7.02158	6.00923	5.86591	6.62251	1
QVHPDTGISSKAMGIMNSFVNDIFER	13	P23527;O60814;Q8N257		2893.4	6.18162	6.72028	5.56461	5.90495	5.56416	5.55507	1
HSAPGLLSMANSGPSTNGCQFFITCSK	8	O43447	C19(Carbamidomethyl); C25(Carbamidomethyl)	2869.31	6.17636	5.99934	6.04436	6.78865	6.13296	6.50813	0
LNFSHGTHEYHAETIKNVR	36	P14618		2253.11	6.15421	6.68038	5.81152	6.51624	5.9915	6.76296	1
AVSGASAGDYSDAIETLLTAIAVIKQSR	7	Q8N684		2807.48	6.15004	5.59799	5.84308	5.112	6.55839	6.14521	1
AHLMEIQVNGGTVAEKLDWAR	8	P39023		2338.18	6.14079	4.91695	5.17171	5.82434	5.53383	4.89208	1
FLEQQNKILLAELEQLKGQGK	15	P08670		2427.35	6.13749	5.87687	6.41651	6.91077	7.09467	6.89889	2
GVNIGGAGSYIYEKPLAEGPQVTGPIEVPAAR	7	P52943		3210.68	6.13245	7.00377	6.0536	6.04221	6.48545	6.24704	0
NLGNSCYLNSVVQVLFSIPDFQRK	14	P45974	C6(Carbamidomethyl)	2798.41	6.12824	4.66077	5.09104	5.01672	6.70087	5.61033	1
HLAILGAGLMGAGIAQVSVDKGLK	6	P40939		2319.33	6.12788	5.99239	5.87018	5.70272	5.58386		1
SSILLDVKPWDDETDMAQLEACVR	36	P29692	C22(Carbamidomethyl)	2791.32	6.12635	6.36663	6.45044	6.24769	6.17411	6.83394	0
LVNLQHLDLLNNKLVTLPVSFAQLK	10	Q96AG4		2830.65	6.0737		6.69214	4.90199	5.57001	6.47444	1
VIHDNFGIVEGLMTTVHAITATQK	13	P04406	M13(Oxidation)	2611.35	6.05433	5.33382	6.01897	6.53972	6.37403	5.42341	0
SLPNEEIVQKIEEVLSGVLDTELR	10	P18583		2710.44	6.03971		3.39419	5.49721	5.59242	4.20429	1
IANPVEGSSGRQVTITGSAASISLAQYLINAR	16	Q15365		3244.72	6.03549	6.69956	6.34756	5.86304	7.24403	6.47817	1
HTGPGILSMANAGPNTNGSQFFICTAK	8	P62937	M9(Oxidation); C24(Carbamidomethyl)	2807.33	6.03481	6.51084	6.67047	6.5526	5.32536	6.94975	0
DGNVLLHEMQIQHPTASLIAK	20	P40227		2315.22	6.03003	6.09214	6.1063	5.59929	6.46579	6.49619	0
KSDLFQDDLYPDTAGPEAALEAEEWFEGK	5	Q9ULV4		3271.5	6.0275		4.57301	5.73722			1
AALSAGKVSPETVDSVIMGNVLQSSSDAIYLAR	3	P42765		3349.73	6.00652		5.66985				1
VFEVSLADLQNDEVAFRKFK	13	P61247		2355.22	6.00264	3.08226	3.95225	3.45214	4.37062	4.60034	2
SSIAGLLLKATNEKLSVYAALQR	19	Q15149		2446.39	5.98719	5.95557	6.28694	6.36586	4.66494	5.26864	2
SGETEDTFIADLVVGLCTGQIKTGAPCR	13	P06733;P13929;P09104	C17(Carbamidomethyl); C27(Carbamidomethyl)	2995.45	5.9864	6.06571	6.01411	6.36389	5.59526	6.05389	1
FTLDCTHPVEDGIMDAANFEQFLQER	13	P35268	C5(Carbamidomethyl)	3083.39	5.97645	6.22753	5.71307	6.14897	6.34586	6.53597	0
VAYVSFGPHAGKLVAIVDVIDQNR	26	P50914		2568.4	5.97239	6.22864	5.92477	6.1055	5.94132	6.02302	1
SCNCLLLKVNQIGSVTESLQACK	22	P06733	C2(Carbamidomethyl); C4(Carbamidomethyl); C22(Carbamidomethyl)	2622.31	5.97085	5.86557	6.93198	6.59926	6.36941	6.99247	1
LRISPDRVYINYYDMNAANVGWNNSTFA	67	P14174		3264.56	5.96533	6.19882	4.63945	4.96783	5.01991	5.29403	2
TATESFASDPILYRPVAVALDTKGPEIR	62	P14618		3017.59	5.95815	4.79794	5.06371	4.90267	4.75037	4.93229	1
CAQGCVCKGASEKCSCCA	30	P04732	C1(Carbamidomethyl); C5(Carbamidomethyl); C7(Carbamidomethyl); C14(Carbamidomethyl); C16(Carbamidomethyl); C17(Carbamidomethyl)	2092.78	5.95677	5.86194	5.23184	6.7274	4.73529	6.7085	2
NIVEAAAVRDISEASVFDAYVLPK	37	P62854		2577.36	5.93174	6.66267	6.03785	6.0313	6.47074	7.13761	1
AAVAGEDGRMIAGQVLDINLAAEPK	19	P07910		2509.31	5.93029	5.14283	5.74675	6.90917	4.9995	5.66214	1
TAIGKAGYTDKVVIGMDVAASEFFR	17	P06733		2646.35	5.9202	6.37085	5.51035	6.04028	5.7131	4.94416	2
RMFGGPGTASRPSSSR	36	P08670		1650.81	5.89665	4.90439	6.67656	5.61433	5.31946	5.69079	1
IANPVEGSTDRQVTITGSAASISLAQYLINVR	15	Q15366		3344.78	5.87767	5.29418	5.74901	6.1122	5.8401	5.86561	1
IKWGDAGAEYVVESTGVFTTMEK	27	P04406		2518.21	5.87204	4.67112	5.10683	5.47628	6.53946	5.20762	1
SGDAAIVDMVPGKPMCVESFSDYPPLGR	62	P68104	C16(Carbamidomethyl)	2995.41	5.85938	5.94512	6.01526	6.09651	6.02241	5.81978	0
HIYYITGETKDQVANSAFVER	9	P07900		2441.2	5.85548	5.47628	5.87342	5.33734	5.79806	5.59398	1
VGAGAPVYMAAVLEYLTAEILELAGNAAR	31	Q6FI13		2933.53	5.85141	5.57298	5.51001	6.01518	6.7468	6.78791	0
MDSAGQDINLNSPNKGLLSDSMTDVPVDTGVAAR	16	O43399	N-Term(Acetyl)	3530.68	5.85096	5.72429	5.06023	4.2262	5.10962	4.70033	1
NIGAKLVQDVANNTNEEAGDGTTTATVLAR	22	P10809		3043.52	5.83276	6.52007	7.22318	6.23742	6.46071	6.06563	1
VETGVLKPGMVVTFAPVNVTTEVK	34	P68104		2515.38	5.83211	5.69453	5.64239	6.23137	5.53567	6.18987	0
AFADALEVIPMALSENSGMNPIQTMTEVR	21	P48643		3135.52	5.83127	1.8587	4.76113	5.66618	4.38482	2.44164	0
KVNAEGSVDSVFSQVCTHLDALK	15	P00568	C16(Carbamidomethyl)	2504.24	5.82976	5.52854	7.61129	6.14763	6.7977	5.73954	1
IQSIPLVIGQFLEAVDQNTAIVGSTTGSNYYVR	6	P43686		3553.86	5.82937		5.16644		5.76539		0
LQLSKNVLCSACSGQGGKSGAVQK	10	O60884	C9(Carbamidomethyl); C12(Carbamidomethyl)	2477.26	5.82511	5.93418	5.22543	4.8682	6.09063	5.53794	2
TLTLVDTGIGMTKADLINNLGTIAKSGTK	34	P08238;P07900		2946.61	5.81995	4.83307	5.62585	6.01197	5.64835	5.2047	2
IQEAGTEVVKAKAGAGSATLSMAYAGAR	6	P40926		2708.39	5.79391	5.07132	6.58913	4.98825	5.82105	4.29762	2
HQGVMVGMGQKDSYVGDEAQSK	29	P68133;P68032;P60709;P63261	M5(Oxidation)	2367.07	5.77887	4.61597	5.46729	4.64486	5.40635	4.56966	1
IGESEDCAGIVSFLCSPDASYVNGENIAVAGYSTRL	5	Q13268	C7(Carbamidomethyl); C15(Carbamidomethyl)	3821.77	5.7741		6.37339				1
AQLVVIAHDVDPIELVVFLPALCRK	6	P62424	C23(Carbamidomethyl)	2815.6	5.76502	5.13406	5.30324	4.72777	5.43778	4.25391	1
YGKIVGCSVHKGFAFVQYVNER	20	P07910	C7(Carbamidomethyl)	2558.31	5.764	4.58538	4.96426	4.50005	4.84579	4.94598	2
TLTLVDTGIGMTKADLINNLGTIAK	132	P08238;P07900		2573.42	5.76353	6.21323	5.98457	6.81845	5.91205	5.95089	1
IQKLSLQNCCLTGAGCGVLSSTLR	6	P13489	C9(Carbamidomethyl); C10(Carbamidomethyl); C16(Carbamidomethyl)	2636.33	5.76329	6.13962	4.7131	5.95316	4.831	5.94965	1
ISPDRVYINYYDMNAANVGWNNSTFA	279	P14174		2995.37	5.75542	5.87833	5.00912	4.93927	5.13247	4.98606	1
YDCGEEILITVLSAMTEEAAVAIKAMAK	11	P63241	C3(Carbamidomethyl)	3027.52	5.75416	5.49601	3.99695	5.83046	5.38126	4.96837	1
TIVAINKDPEAPIFQVADYGIVADLFK	9	P13804		2947.57	5.73968	1.49243	7.07989	7.4194	6.68441		1
IFFAGDTIPKSPFVVQVGEACNPNACR	8	O75369	C21(Carbamidomethyl); C26(Carbamidomethyl)	2994.47	5.73953	5.36809	4.4775	5.25534	6.78536	5.76705	1
NIILEEGKEILVGDVGQTVDDPYATFVK	44	P23528		3062.58	5.73943	6.21066	7.15835	6.51995	6.65272	6.94418	1
ALMLQGVDLLADAVAVTMGPKGR	44	P10809		2326.27	5.73384	5.98868	6.23386	6.13743	6.22974	5.99247	1
VLVQNAAGSQEKLAQAAQSSVATITR	7	Q9Y490		2641.43	5.72533	5.40668	5.90229	5.36075	6.10072	5.34801	1
MKTILSNQTVDIPENVDITLKGR	17	P32969		2585.39	5.70958	6.04323	6.40037	4.90679	5.46508	5.23854	2
ALRVLQAQGSSDPEEESVLYSNR	7	Q15785		2548.26	5.70167	4.96475	5.08004	5.49415	4.41895	4.67727	1
MRIESLSSQLSNLQKESR	14	P20700		2106.09	5.69538	6.0789	5.41493	5.49933	5.50168	4.95892	2
VASGPSPGEGISPQSAQAPQAPGDNHVVPVLR	26	Q14764		3119.57	5.68563	4.01232	4.04271	3.93705	4.74739	3.77521	0
FGIVTSSAGTGTTEDTEAKKR	8	P82979		2156.08	5.67055	4.42791	4.6903	5.41765	4.74489	4.43868	2
VTISNRLVSSPCCIVTSTYGWTANMER	10	P08238	C12(Carbamidomethyl); C13(Carbamidomethyl)	3102.5	5.66172	5.0227	5.92376	6.1799	5.54986	5.0976	1
CGETGHVAINCSKTSEVNCYR	12	P62633	C1(Carbamidomethyl); C11(Carbamidomethyl); C19(Carbamidomethyl)	2442.08	5.65826	4.84683	4.60424	5.08985	5.23036	4.41683	1
NMSVIAHVDHGKSTLTDSLVCK	12	P13639	C21(Carbamidomethyl)	2412.2	5.64378	5.24716	4.31209	5.83906	5.43634	5.76273	1
AMQDAEVSKSDIGEVILVGGMTR	24	P38646		2406.2	5.63786	4.4673	4.7358	4.69495	5.23523	5.47105	1
ENIQKSLAGSSGPGASSGTSGDHGELVVR	18	P29692		2797.37	5.63463	5.54564	6.45614	6.6425	5.60991	5.61186	1
SLGQNPTEAELQDMINEVDADGNGTIDFPEFLTMMAR	20	P62158		4069.88	5.63372	6.26346	4.44623	5.36947	6.25567	5.7266	0
LGADVTAVEFLGHVGGVGIDMEISKNFQR	9	P09622		3059.56	5.62584	5.5167	5.08709	4.79017	5.20539	5.58159	1
EIFDSRGNPTVEVDLFTSKGLFR	48	P06733		2627.35	5.62081	5.48407	5.83366	4.98342	5.64164	6.00269	2
KGGISNILEELVVQPLLVSVSALTLATETVR	13	P50991		3249.86	5.61999	5.71251	5.1917	5.73736	5.14634	5.95025	1
LLEAAAQSTKGYYSPYSVSGSGSTAGSR	13	Q15149		2795.33	5.61726	4.73925	5.48938	4.82817	4.73075	4.41685	1
AKPKEADESLNFEEQILEAAK	10	Q9Y490		2360.2	5.61447	4.977	4.59525	5.60063	5.28836	4.66225	1
SLAGSSGPGASSGTSGDHGELVVR	86	P29692		2185.05	5.60433	5.42411	5.50528	6.63796	6.01775	5.26636	0
QVQTSGGLWTECIAQLSPEQQAAIQELLNSA	7	O00410	C12(Carbamidomethyl)	3370.67	5.60189		4.51678	4.78458	5.16161	5.03866	0
SHMMDVQGSTQDSAIKDFVLK	6	P13667		2337.12	5.60074	5.00285	5.39821	4.86082	5.16409	5.09725	1
KFNALFAQGNYSEAAKVAANAPK	8	Q00610		2410.24	5.59961	5.33695	6.09465	4.27327	5.15827	4.68263	2
AAKVLEQLTGQTPVFSKAR	28	P62913		2044.15	5.59472	5.01226	4.94776	5.60801	4.37292	5.2191	2
TLVDIAKSQDAEVGDGTTSVTLLAAEFLK	4	Q99832		2992.57	5.58887		5.57644	2.35947			1
MYGISLCQAILDETKGDYEKILVALCGGN	11	P04083	C7(Carbamidomethyl); C26(Carbamidomethyl)	3231.56	5.58507	5.89941	6.14312	5.03568	6.24636	5.41325	2
GVLANRVAVVTGSTSGIGFAIAR	8	Q13268		2216.25	5.58416	4.86107	4.73237	4.68913	4.5663	4.79223	1
KGILVMNTPNGNSLSAAELTCGMIMCLAR	21	O43175	C21(Carbamidomethyl); C26(Carbamidomethyl)	3122.53	5.58349	5.98955	5.39757	6.08286	5.66456	6.16749	1
MMPTPVILLKEGTDSSQGIPQLVSNISACQVIAEAVR	12	Q99832	N-Term(Acetyl); C29(Carbamidomethyl)	3995.09	5.57485		4.98276	5.00392	5.23217	4.38603	1
TCATVTIGGINIAEALVSKGLATVIR	10	Q7KZF4	C2(Carbamidomethyl)	2628.46	5.57196		5.70451	5.36876	5.87145	4.28052	1
LSGGHSLHETSTVLVETVTKSSSSR	23	Q14315		2599.32	5.57187	5.55018	5.32287	5.79457	5.83918	5.71449	1
MREIVHLQAGQCGNQIGAK	102	P04350;P68371;P07437;Q9BVA1;Q13885;Q13509	C12(Carbamidomethyl)	2110.06	5.57167	5.17566	5.54884	5.35714	5.25742	5.29732	1
FVSISDLLVPKDLGTESQIFISR	7	P50395		2564.38	5.56981		5.65952	6.44657	5.13912	5.35298	1
YALQMEQLNGILLHLESELAQTR	9	P05783		2670.39	5.56679	5.97195	5.59549	5.68881	5.6915	5.94213	0
IGHVGMQIEHIIENIVAVTK	12	O76021		2201.2	5.56524	4.49067	5.69002	5.69908	4.90345	4.35407	0
MVAAATNNLCEAANAAVQGHASQEK	11	Q9Y490	C10(Carbamidomethyl)	2556.18	5.56393	3.94892	5.82948	3.85553	5.54004	4.34566	0
SFVLNLGKDSNNLCLHFNPR	72	P09382	C14(Carbamidomethyl)	2345.18	5.55899	5.62905	5.71464	5.85901	5.35194	5.53459	1
ILTFDQLALDSPKGCGTVLLSGPR	28	Q07020	C15(Carbamidomethyl)	2558.36	5.55713	5.81229	5.06799	5.19043	5.44844	6.0108	1
TVIIEQSWGSPKVTKDGVTVAK	54	P10809		2343.3	5.55544	5.59614	5.03603	5.72279	4.97253	4.90475	2
LVQDVANNTNEEAGDGTTTATVLAR	297	P10809		2560.25	5.54481	5.72238	5.75845	6.04129	5.24788	5.79992	0
ATTAALLLEAQAATGFLVDPVRNQR	6	Q15149		2626.44	5.54314	4.69856	4.53634	4.8793		4.47378	1
TTGIVMDSGDGVTHTVPIYEGYALPHAILR	25	P60709;P63261		3183.62	5.53518	5.5563	5.42677	4.96397	5.43684	5.49831	0
SIQEELQQLRQSSEAEIQAK	20	Q15149		2315.19	5.53363	4.7984	4.97376	3.7529	5.02842	4.81277	1
TEMDWVLKHSGPNSADSANDGFVR	11	P52597		2633.2	5.53265	4.63809	4.813	4.4296	4.34787	4.58115	1
GVSKAVEHINKTIAPALVSK	40	P06733		2062.2	5.53195	6.06207	5.8964	6.1876	6.05763	6.68177	2
FSMVVQDGIVKALNVEPDGTGLTCSLAPNIISQL	9	P30044	C24(Carbamidomethyl)	3586.85	5.52748		4.01222		5.0519		1
TIQFVDWCPTGFKVGINYQPPTVVPGGDLAK	23	Q13748;Q9BQE3	C8(Carbamidomethyl)	3404.74	5.52589	5.27717	4.47542	5.1018	4.81742	4.99747	1
GADRMSSFGDFVALSDVCDVPTAK	7	P31939	C18(Carbamidomethyl)	2545.16	5.52276	3.28707	4.24932	4.20384	4.57926	5.24534	1
MCLDQYSMLPATPWGVWEIIKR	6	P13995	C2(Carbamidomethyl)	2694.32	5.51927	4.58279	4.92548	4.55806	5.58011	5.22798	1
LKEAQNTCAMLTTFNEIDMSNIQEMR	7	P36957	C8(Carbamidomethyl)	3088.42	5.51912	4.34725	4.5219	5.62985	4.88298	5.09713	1
LATALQKLEEAEKAADESER	36	P09493;P07951;P67936;P06753		2202.13	5.51049	5.81867	3.99401	5.9461	4.87295	5.62077	2
GTKVILHLKEDQTEYLEER	7	P08238;P07900		2301.21	5.4893	4.64297	5.27878	5.02652	4.97285	4.96645	2
MSVQPTVSLGGFEITPPVVLRLK	68	P06748		2468.38	5.48254	4.98132	6.06989	5.13502	5.19056	5.28637	1
GIFPVLCKDPVQEAWAEDVDLR	25	P14618	C7(Carbamidomethyl)	2557.28	5.47776	5.64151	5.02736	5.44959	5.40765	4.847	1
AMQDAEVSKSDIGEVILVGGMTRMPK	9	P38646		2762.4	5.47446	4.42692	4.58397	5.63129	4.96223	4.0241	2
NDEELNKLLGGVTIAQGGVLPNIQAVLLPK	9	Q8IUE6;P16104		3113.76	5.4743		6.11599	5.70505	6.36207		1
AFRNIPGITLLNVSKLNILK	11	P36578		2224.36	5.47144	3.52257	4.58209	4.13541	4.82271	4.01321	2
KTCTTVAFTQVNSEDKGALAK	36	P62424	C3(Carbamidomethyl)	2269.14	5.4702	5.43217	5.34153	4.64894	4.67319	5.04987	2
FQSSHHPTDITSLDQYVER	23	P14625		2260.05	5.46957	5.31979	5.25516	5.60428	5.73249	4.85582	0
ISVREPMQTGIKAVDSLVPIGR	14	P25705		2366.31	5.46928	5.03053	5.00288	4.39819	4.6058	4.90515	2
TQETLSQAGQKTSAALSTVGSAISR	8	O43399		2492.29	5.4666	5.07001	4.16418	5.32524	5.14956	4.78912	1
AYHEQLSVAEITNACFEPANQMVK	16	Q13748;P68363;P68366	C15(Carbamidomethyl)	2750.29	5.46135	4.22194	4.83642	4.18192	4.75147	5.28179	0
RMATEVAADALGEEWKGYVVR	16	P62753		2351.19	5.46065	6.01309	4.96706	4.95526	5.62551	4.97089	2
MLLADQGQSWKEEVVTVETWQEGSLK	13	P09211		2991.47	5.45693	4.71597	4.03498	4.17059	4.49804	5.7359	1
ELVAQGKVGAIPANALDDGQWSQGLISAAR	8	Q9Y490		3035.58	5.45583	4.34942	4.31506	5.67999	5.93871	5.07348	1
LSNLALVKPEKTKAVENYLIQMAR	11	O14737		2729.54	5.44894	3.46578	4.56473	3.03811	4.78346	5.15318	2
TLLEGSGLESIISIIHSSLAEPR	13	P49327		2422.32	5.44598	5.4246	6.23609	5.62036	5.09099	5.15092	0
LIDLHSPSEIVKQITSISIEPGVEVEVTIADA	37	P60866		3402.82	5.43387	4.54873	5.3521	4.6408	5.45498	4.97072	1
ESYSVYVYKVLKQVHPDTGISSK	33	O60814		2627.37	5.42902	5.05269	5.88011	6.05896	5.77368	5.36567	2
SLLHGDFHAFSAGPGLFSYIR	10	P08195		2292.15	5.42816	4.47144	4.90514	5.01652	4.7916	4.74294	0
SLLGKDVLFLKDCVGPEVEK	28	P00558	C13(Carbamidomethyl)	2246.21	5.42784	4.81559	5.19903	5.5526	4.21336	4.12058	2
IVAPGKGILAADESTGSIAKR	37	P04075		2054.16	5.41865	5.93281	5.45992	5.93505	5.26282	6.39869	2
AAIDWFDGKEFSGNPIKVSFATR	24	P35637		2556.29	5.41734	4.94672	5.1276	4.71969	5.17065	5.55409	2
SVYAHFPINVVIQENGSLVEIR	19	P32969		2484.33	5.41706	5.46789	5.43775	5.39104	4.90501	5.28809	0
VTTMDAELEFAIQPNTTGKQLFDQVVK	9	P35241;P15311;P26038		3023.54	5.41498	4.77393	5.07452	4.43669	4.18366	4.31711	1
IQQESGCKIQIAPDSGGLPER	24	Q96AE4	C7(Carbamidomethyl)	2283.14	5.41368	5.37682	5.70099	4.77401	5.28903	5.15937	1
QAVDQIKSQEQLAAELAEYTAK	24	P15311		2434.25	5.41359	4.62271	5.37913	5.51049	5.47384	5.46045	1
CATSKPAFFAEKLHQAMKGVGTR	8	P04083	C1(Carbamidomethyl)	2535.29	5.41238	3.8002	3.77351	4.59167	4.19524	4.35624	2
VLAKPQNTAEVQKVQLTGEPVPMAR	8	P15151		2704.48	5.40748	4.25455	5.45259	4.7836	3.29293	4.64115	1
LVNLQHLDLLNNKLVTLPVSFAQLKNLK	7	Q96AG4		3185.88	5.40431	5.06492	4.59913	4.34057	4.29551	3.65391	2
MVVNEGSDGGQSVYHVHLHVLGGR	38	P49773		2547.24	5.40013	5.74698	4.88492	5.62996	6.03587	5.23239	0
LLDFGSLSNLQVTQPTVGMNFKTPRGPV	12	P08708		3016.6	5.39368	6.16328	6.30079	6.38002	5.78356	5.47649	2
VLQATVVAVGSGSKGKGGEIQPVSVK	25	P61604		2495.42	5.39138	4.55315	5.36076	5.3992	4.97123	4.50299	2
NLATTVTEEILEKSFSEFGKLER	7	O43390		2641.37	5.38987	5.21494	5.16706	5.40783	5.0868	5.94531	2
AQEALDAVSTLEEGHAQYLTSLADASALVAALTR	9	O75146		3485.78	5.38488		5.36653	5.17346	5.87359	3.74427	0
SVHPYEVAEVIALPVEQGNFPYLQWVR	18	O60888		3140.62	5.37869	5.35076	5.76225	4.68995	5.27086	5.68796	0
MRYVASYLLAALGGNSSPSAKDIK	21	P05387		2512.32	5.37664	5.47757	5.56066	5.34843	4.91849	3.8333	2
EAAFRNIKTIAECLADELINAAK	6	P46782	C13(Carbamidomethyl)	2561.33	5.3765	5.14424	3.03751	5.26375	3.61501	4.84816	2
MATEVAADALGEEWKGYVVR	45	P62753		2195.08	5.37141	5.59732	5.35389	5.11549	5.59336	5.38073	1
ASITALEAKIAQLEEQLDNETKER	11	P35579		2700.38	5.36794	3.73697	4.16272	4.84327	4.47776	4.57547	2
IIMTSSASGIYGNFGQANYSAAK	12	P51659		2351.13	5.36634	4.81158	4.29894	4.19613	3.70307	4.82519	0
SGDAAIVEMVPGKPMCVESFSQYPPLGR	21	Q05639	C16(Carbamidomethyl)	3022.45	5.36524	5.72346	4.97935	5.78411	6.31599	5.23582	0
IDASKSVDEVFDEVVQIFDKEG	5	P30085		2469.2	5.36089	4.59636	4.92774	4.69144	3.80806		2
GLEPERIIGATDSSGELMFLMK	19	P83916		2394.19	5.35936	4.80946	4.30613	4.8324	4.31248	5.02573	1
LVVLDEELEGISPDELKDELPERQPR	9	P60983		3018.57	5.35669	5.13478	4.88188	4.18246	5.78959	4.29929	2
HSQAVEELAEQLEQTKR	16	P35579		1996	5.35609	4.85686	5.29947	4.39619	5.04442	5.76457	1
SIQFVDWCPTGFKVGINYQPPTVVPGGDLAK	22	P68363;P68366	C8(Carbamidomethyl)	3390.72	5.35091	5.47795	5.62636	5.79648	5.91261	5.67538	1
LLREELQLLQEQGSYVGEVVR	11	P62195		2458.33	5.34905	4.52172	4.61991	4.64127	4.55391	4.02804	1
GIHSAIDASQTPDVVFASILAAFSK	29	P54819		2545.32	5.34629	4.65793	5.42363	5.44169	6.63993	5.5055	0
TTSHGRVGATAAVYSAAILEYLTAEVLELAGNASK	18	P0C0S5;Q71UI9		3534.86	5.33241	5.50799	5.25812	6.07851	5.36223	6.17034	1
CSGDGVGAPRLPLPYGFSAMQGWR	6	O15355	C1(Carbamidomethyl)	2579.22	5.33216	5.36702	5.12126	5.19181	5.04707	5.62833	1
LKPYFLTDGTGTVTPANASGINDGAAAVVLMK	10	Q9BWD1		3192.66	5.33171	5.96086	5.17863	5.52253	5.29651	4.29572	0
GKATISNDGATILKLLDVVHPAAK	7	Q99832		2432.37	5.32984	4.21102	5.10233	3.55126	5.96351	4.88044	2
AMGIMNSFVNDIFERIAGEASR	18	P23527;O60814		2428.17	5.32827	5.5273	5.75343	5.23607	5.18332	5.54298	1
SAVLSEPVLFLKPSTAYAPEGSPILMPAYTR	13	Q6P587		3305.75	5.32637	4.44443	4.48346	4.68457	4.37599	4.87557	0
YGGPPPDSVYSGVQPGIGTEVFVGKIPR	16	O43390		2873.5	5.32326	3.90776	5.49441	5.92598	3.99845	4.76712	1
FTYRGVDLDQLLDMSYEQLMQLYSAR	7	P62841		3155.52	5.32322		2.05301	5.78182	4.78508	5.21919	1
MFLRGDSVIVVLRNPLIAGK	14	P62316		2198.29	5.32189	6.34942	5.39401	4.81916	5.78374	5.46459	2
SIEALLEAGQARDAQDVQASQAEADQQQTR	27	Q9P2E9		3227.55	5.32149	4.2478	5.92285	6.57657	4.44814	6.15436	1
ALMLQGVDLLADAVAVTMGPK	52	P10809		2113.14	5.31831	5.79556	5.12905	5.06106	5.40674	5.32196	0
TLTAVHDAILEDLVFPSEIVGKR	43	P62081		2523.38	5.31456	4.77223	5.03941	4.55084	4.51607	4.7909	1
AQLGGPEAAKSDETAAK	76	P04792		1643.82	5.31393	4.86892	4.70836	4.95419	4.51798	4.728	1
FLVHNVKELEVLLMCNK	36	P62910	C15(Carbamidomethyl)	2086.12	5.31277	6.33069	4.84952	5.90106	5.91067	5.71369	1
LIDDYGVEEEPAELPEGTSLTVDNKR	10	Q00577		2889.4	5.31275	4.94168	4.23849	4.79378	4.70061	5.17904	1
VAHALAEGLGVIACIGEKLDER	7	P60174	C14(Carbamidomethyl)	2321.23	5.31245	6.67555	5.64323	5.53631	5.31214	6.95392	1
VGPDTERIYDDDFFQNLDGVANALDNVDAR	8	P22314		3354.55	5.30912	5.54387	5.50534	4.52954	5.5887	6.35413	1
VKGGGHVAQIYAIRQSISK	24	P62249		2012.14	5.30576	4.57307	4.35891	4.83657	5.17965	4.49235	2
LLEDGEDFNLGDALDSSNSMQTIQKTTTR	15	P05783		3199.49	5.30459	4.77543	5.07649	5.62466	6.24954	4.5369	1
ELASQPDVDGFLVGGASLKPEFVDIINAKQ	17	P60174		3157.65	5.30282	4.65175	4.99086	5.46764	5.28119	4.58124	1
AGFAGDDAPRAVFPSIVGRPR	42	Q6S8J3;P68133;P68032;P60709;P63261		2156.14	5.29671	4.86889	5.06176	5.15212	4.9716	5.34513	1
TGVHHYSGNNIELGTACGKYYR	28	P62888	C17(Carbamidomethyl)	2497.17	5.29311	4.99308	5.14247	5.72017	5.62327	5.78301	1
NMITGTSQADCAVLIVAAGVGEFEAGISK	15	P68104;Q05639	C11(Carbamidomethyl)	2909.45	5.29229		5.12692	4.73979	5.35197	2.27955	0
AIEMERGNFGGSFAGSFGGAGGHAPGVAR	13	P52272		2764.3	5.29179	4.16659	5.0609	3.50613	5.27388	5.34941	1
FNAHGDANTIVCNSKDGGAWGTEQR	54	P09382	C12(Carbamidomethyl)	2705.21	5.28822	6.22416	5.11977	5.75846	6.27144	6.43481	1
AFGPGLEPTGCIVDKPAEFTIDAR	15	Q14315	C11(Carbamidomethyl)	2561.27	5.28796	5.27277	4.64181	5.41407	5.44934	5.35931	0
ESYSIYVYKVLKQVHPDTGISSK	17	P23527;Q8N257		2641.38	5.28548	4.50303	4.14361	5.16131	4.47628	4.94005	2
VQRAVCMLSNTTAIAEAWAR	16	Q13748;P68363;P68366	C6(Carbamidomethyl)	2248.13	5.28487	4.49252	4.67473	5.18218	4.43751	4.88573	1
GNFGGSFAGSFGGAGGHAPGVAR	56	P52272		2034.95	5.28406	5.05419	5.22292	5.45463	4.86597	4.80213	0
ISGLIYEETRGVLKVFLENVIR	23	P62805		2548.44	5.2835	5.51287	5.70741	5.4291	5.3097	5.15446	2
CSVIRDSLLQDGEFSMDLR	153	P07737	C1(Carbamidomethyl)	2241.06	5.28211	4.8419	5.07006	5.43799	4.97623	4.7589	1
SHSTEPGLVLTLGQGDVGQLGLGENVMER	8	P18754		2993.51	5.28094	6.85418	5.79621	6.33721	5.42111	5.78123	0
AVVSQRLTESPCALVASQYGWSGNMER	38	P14625	C12(Carbamidomethyl)	2996.43	5.27708	5.37204	5.22279	5.48371	5.9248	4.77505	1
IGEGLDQALPCLTELILTNNSLVELGDLDPLASLK	6	P09661	C11(Carbamidomethyl)	3734.98	5.27677		2.62595	3.16153	3.62264		0
ARPFPDGLAEDIDKGEVSAR	25	P13639		2143.07	5.26792	4.49829	4.58712	4.71396	4.72661	4.79524	1
NQGGYGGSSSSSSYGSGR	44	P09651		1694.7	5.26636	5.14796	5.26006	5.80287	5.12394	5.34237	0
HVAEVLEYTKDEQLESLFQR	23	P05198		2434.23	5.26541	4.86464	4.80071	5.27441	4.82403	5.56247	1
ATVASSTQKFQDLGVKNSEPSAR	34	Q9UHD8		2421.23	5.26539	4.77577	4.83952	4.83442	5.37658	5.46073	2
LSNIFVIGKGNKPWISLPR	39	P62701		2139.24	5.2645	5.11497	4.82176	5.20948	5.12605	4.63023	1
CTLAEKLGGSAVISLEGKPL	40	P23528	C1(Carbamidomethyl)	2043.11	5.26289	3.50333	4.96313	4.63671	3.96296	4.36488	1
SGDAAIVDMVPGKPMCVESFSDYPPLGR	36	P68104	M9(Oxidation); C16(Carbamidomethyl)	3011.39	5.26227	5.01543	4.93261	5.19109	5.39845	5.40461	0
MDWVMKHNGPNDASDGTVR	24	P31942	N-Term(Acetyl)	2171.96	5.25839	4.99162	4.79006	5.5162	4.9726	4.88559	1
EATTLANGVLASLNLPAAIEDVSGDTVPQSILTK	8	Q8WUM4		3408.83	5.2515		4.77143	5.25759	5.73275		0
LERENAEVDGDDDAEEMEAKAED	11	P05198		2580.05	5.25119	5.50738	5.31215	5.1274	5.05542	5.78582	2
SQDDEIGDGTTGVVVLAGALLEEAEQLLDR	7	P48643		3113.54	5.25029			1.57016	2.64133		0
TVLSANADHMAQIEGLMDDVDFKAK	6	Q9Y4L1		2719.31	5.24766	3.93523	5.52054	4.60409	4.59297	3.39318	1
RIQLVEEELDRAQER	21	P67936;P06753;P07951;P09493		1883.99	5.24759	4.68418	4.63326	5.2085	4.98907	5.08315	2
LAKYNQLLRIEEELGSK	16	P06733		2004.11	5.24415	4.44317	4.5559	5.22432	4.4724	4.90828	2
LISWYDNEFGYSNRVVDLMAHMASKE	51	P04406		3075.43	5.24337	4.61712	5.89587	5.44976	4.83013	4.83731	2
LLQDSVDFSLADAINTEFKNTR	308	P08670		2497.26	5.23482	6.12148	5.56134	5.94584	5.25614	5.06092	1
NIELICQENEGENDPVLQR	26	Q15691	C6(Carbamidomethyl)	2270.07	5.23391	4.75697	4.93871	5.35182	5.11298	4.91024	0
TLMNLGGLAVARDDGLFSGDPNWFPK	14	P37802		2791.38	5.22941	5.31395	5.48293	6.08429	5.64493	5.94078	1
IAQITGPPDRCQHAAEIITDLLR	11	Q96AE4	C11(Carbamidomethyl)	2588.37	5.22514	5.77232	4.61845	5.82248	5.28119	4.89659	1
YAICSALAASALPALVMSK	27	P36578	C4(Carbamidomethyl)	1937.02	5.22449	4.91734	4.67939	5.15995	4.95647	5.1808	0
GDGPICLVLAPTRELAQQVQQVAAEYCR	6	P17844	C6(Carbamidomethyl); C27(Carbamidomethyl)	3142.58	5.22125	5.96987	5.23244	5.06479	5.38223	6.02097	1
HLQLAIRNDEELNKLLGR	16	Q93077		2132.19	5.22004	5.18241	5.38643	5.32878	5.09461	4.87021	2
INISEGNCPERIITLAGPTNAIFK	6	Q15366	C8(Carbamidomethyl)	2628.38	5.21564	5.32369	5.18578	6.01103	5.61774	5.1637	1
MQAQMQMQMQGGDGDGGALGHHV	9	Q15019		2384	5.21524	6.10056	5.88801	5.64279	5.87807	4.54816	0
TKSTGGAPTFNVTVTKTDK	37	P07737		1953.02	5.21187	4.95559	5.17126	4.9482	5.43599	5.21177	2
VAGCSVHKGYAFVQYSNER	34	Q9UKM9	C4(Carbamidomethyl)	2172.03	5.20805	4.10475	4.83168	4.00075	4.25174	4.63583	1
GLGHQVATDALVAMEK	21	Q9Y3I0		1639.85	5.20039	4.96112	4.89656	4.6405	4.85788	4.83873	0
HSSVYPTQEELEAVQNMVSHTER	23	Q12906		2671.23	5.19683	6.19225	6.77507	5.50266	5.32815	5.16383	0
SSGVKSTHQAAIVSKIDSR	8	Q05682		1971.06	5.19636	4.44065	4.78013	4.5987	4.81745	4.98361	2
MAEIGEHVAPSEAANSLEQAQAAAER	6	P27708		2680.27	5.19543	5.62362	5.34728	6.17315	4.54069		0
LQAALDDEEAGGRPAMEPGNGSLDLGGDSAGR	35	Q00839		3126.43	5.1931	6.08723	6.04868	6.06154	6.30047	5.79931	0
LDIDSPPITARNTGIICTIGPASR	10	P14618	C17(Carbamidomethyl)	2538.34	5.19202	6.45897	5.45217	5.48055	4.93537	5.49242	1
TLAFTSVDLTNKATGKLIAQGR	7	Q9NPJ3		2305.28	5.1911	4.08283	4.03643	4.9948	4.03579	4.31809	2
ASGATILSTLANLEGEETFEAAMLGQAEEVVQER	4	P17987		3564.74	5.18839		4.96084		4.21137		0
THINIVVIGHVDSGKSTTTGHLIYK	31	P68104;Q05639		2690.45	5.1846	5.07258	5.72918	5.27431	6.19993	4.5566	1
AQVPFSSCLEAYGAPEQVDDFWSTALQAK	5	P45974	C8(Carbamidomethyl)	3215.5	5.18433		4.84582	1.74027	1.21037		0
CLAFHDISPQAPTHFLVIPK	17	P49773	C1(Carbamidomethyl)	2291.2	5.1821	5.53667	4.81684	5.83582	5.10358	5.07528	0
VANTSTQTMGPRPAAAAAAATPAVR	16	P11940		2381.22	5.18112	5.02696	5.67014	4.6191	4.67433	5.21113	0
ANQAIQMACQSLGEPGCTQAQVLSAATIVAK	23	Q9Y490	C9(Carbamidomethyl); C17(Carbamidomethyl)	3216.57	5.18043	4.92544	6.08648	5.87044	5.51048	4.3585	0
SAVLISSKPGCFIAGADINMLAACK	11	P40939	C11(Carbamidomethyl); C24(Carbamidomethyl)	2594.31	5.1752	4.16618	5.06059	5.21805	4.8748	6.03255	0
ATCAPQHGAPGPGPADASKVVAK	28	P21333	C3(Carbamidomethyl)	2187.09	5.17432	4.84651	5.60974	5.58924	5.96322	5.57549	1
ILGADTSVDLEETGRVLSIGDGIAR	30	P25705		2557.35	5.17429	5.69736	5.48206	5.92265	5.1573	5.95881	1
DCVGPEVEKACANPAAGSVILLENLR	3	P00558	C2(Carbamidomethyl); C11(Carbamidomethyl)	2782.38	5.17242		5.07587	3.91248			1
SLDMDSIIAEVKAQYEDIANR	28	P05787		2381.16	5.17084	5.16926	5.20673	5.48819	5.35046	5.58521	1
IISNASCTTNCLAPLAK	54	P04406	C7(Carbamidomethyl); C11(Carbamidomethyl)	1833.92	5.16991	5.06945	4.92897	4.93664	4.96983	4.87256	0
AVTGYKDPYTGQQISLFQAMQK	13	Q15149		2474.23	5.16931	4.32451	4.43385	4.91402	4.57183	4.48222	1
NEEDAAELVALAQAVNAR	21	P22314		1883.94	5.16614	4.4068	4.77342	4.27131	4.51554	4.37976	0
IAVAAQNCYKVTNGAFTGEISPGMIK	18	P60174	C8(Carbamidomethyl)	2740.38	5.16465	5.47236	5.81765	6.06841	5.8444	5.37244	1
VTIAQGGVLPNIQAVLLPK	40	Q93077;Q96KK5;Q6FI13;P20671		1931.17	5.16402	4.96047	4.35135	4.88433	4.99402	4.99127	0
TTTGNKVFGALKGAVDGGLSIPHSTK	7	P46777		2556.36	5.16037	5.38355	5.63768	4.55758	5.37002	4.37474	2
MGAMAKPDCIITCDGKNLTIK	6	Q01469	C9(Carbamidomethyl); C13(Carbamidomethyl)	2337.14	5.15925	4.74465	4.06321	5.16136	4.46788	3.86952	1
VAAKLEVAPISDIIAIKSPDTFVR	9	P13804		2553.46	5.1552	6.21374	5.74034	5.19156	5.31662	4.5344	2
MELGELLYNKSEYIETASGNKVSR	7	Q9BTE1	N-Term(Acetyl)	2773.37	5.15405	4.90326	5.03292	5.6719	3.97477	4.99105	2
GHFEAFGTLTDCVVVVNPQTKR	10	Q13151	C12(Carbamidomethyl)	2475.26	5.15138	4.96622	5.01758	5.54672	4.85458	5.39224	1
GLGLDESGLAKQAASGLVGQENAR	8	Q9Y265		2341.21	5.14856	4.86569	4.02933	4.91637	4.7718	5.86277	1
FTASAGIQVVGDDLTVTNPKRIAK	16	P06733		2501.36	5.14798	3.44723	5.43966	4.825	5.45721	5.1705	2
LMGLEALKSHIMAAKAVANTMR	6	P48643		2356.26	5.14346	4.90503	6.12589	5.18599	5.33369	4.58866	2
TIIGSFNGALAAVPVQDLGSTVIKEVLKR	10	Q9BWD1		2996.7	5.14167	4.59671	4.18613	5.13581	5.19458	4.48045	2
KRGHVFEESQVAGTPMFVVK	14	P13639		2246.17	5.14165	5.00338	5.59674	5.52309	5.61479	5.64038	2
ITEGDVVVGIASSGLHSNGFSLVR	13	P22102		2414.27	5.14084	4.95449	3.01333	4.81599	3.35618	4.30769	0
QTVADQVLVGSYCVFSNQGGLVHPK	7	P56537	C13(Carbamidomethyl)	2703.35	5.13919	5.01236	4.91594	3.57346	4.90049	4.67509	0
ICRDLSHIGDAVVISCAKDGVK	12	P12004	C2(Carbamidomethyl); C16(Carbamidomethyl)	2413.23	5.13567	4.40459	5.44284	5.31973	3.72447	4.72725	2
TLFVKGLSEDTTEETLKESFDGSVR	10	P19338		2788.39	5.1351	3.95062	3.83961	3.90585	5.13479	4.27083	2
KFVADGIFKAELNEFLTR	7	P23396		2098.12	5.13472	4.2659	5.19989	4.57616	4.61628	4.86413	2
IASPEGQDYLKGMAAAGNYAWVNR	19	Q9Y3I0		2582.24	5.13301	5.1561	5.25224	5.52992	4.82307	5.49201	1
VGLTNYAAAYCTGLLLAR	26	P46777	C11(Carbamidomethyl)	1927.01	5.12836	5.1371	5.11116	4.87385	5.12314	4.74118	0
SDEMNVKVLDFEHFLPMLQTVAK	4	P60660		2691.34	5.12754		4.16216	4.09053			1
FFYSDQNVDSRDPVQLNLLYVQAR	5	Q9Y490;Q9Y4G6		2887.44	5.12736	5.33601	5.18336		5.88069	6.3697	1
GISLNPEQWSQLKEQISDIDDAVR	17	P53999		2741.38	5.12357	6.04349	4.83583	5.29899	5.24543	5.48384	1
YDNSLKIISNASCTTNCLAPLAK	22	P04406	C13(Carbamidomethyl); C17(Carbamidomethyl)	2554.26	5.12083	5.86517	6.65585	5.47677	4.64338	5.69492	1
CSVIRDSLLQDGEFSMDLRTK	8	P07737	C1(Carbamidomethyl)	2470.22	5.11636	5.30094	5.05172	4.77907	4.33245	5.36672	2
AENGKLVINGNPITIFQERDPSK	24	P04406		2540.33	5.1159	4.30137	4.53785	5.12454	5.17505	4.74964	2
KLGLVFDDVVGIVEIINSKDVK	7	Q01518		2400.38	5.11511	4.68818	4.134	5.2514	4.45156	5.0904	2
HLEINPDHPIVETLRQK	9	P08238		2039.1	5.11483	4.05554	4.91602	4.6182	3.78617	3.73154	1
IGDEDVGRVIFGLFGKTVPK	13	P23284		2147.18	5.10893	4.63983	4.95872	5.18291	4.75101	5.01797	2
KASGPPVSELITKAVAASK	38	P10412;P16403		1854.07	5.10722	5.53362	5.37605	4.70789	5.06038	5.37232	2
GVLKVFLENVIRDAVTYTEHAK	19	P62805		2502.37	5.10616	5.16096	6.05106	6.09521	5.87712	5.38477	2
TQQAAQANITLQEQIEAIHKAK	8	Q15459		2434.3	5.10555	4.37862	3.82941	4.32343	4.38729	4.09188	1
FGSTQEYEACFGQFILTPHIMTR	9	P27708	C10(Carbamidomethyl)	2733.29	5.10426	4.96734	3.93445	4.03872	4.93745	4.05189	0
NLANTVTEEILEKAFSQFGKLER	8	O60506		2637.4	5.10305	4.89171	3.71833	5.3586	5.51254	6.12496	2
SICTTVLELLDKYLIANATNPESK	3	P27348	C3(Carbamidomethyl)	2693.4	5.0995			4.557	5.71558		1
ALALGASTVMMGSLLAATTEAPGEYFFSDGIR	8	P12268		3247.6	5.09946		3.8704	4.42797	4.94701		0
THFGGGKTTGFGMIYDSLDYAK	9	P62847		2366.12	5.09434	4.53999	4.76736	5.45714	4.12896	4.17421	1
AVLSAEQLRDEEVHAGLGELLR	21	P50454		2405.28	5.09389	4.98177	5.31862	6.42048	5.14708	5.74947	1
TLGLYGKDQQEAALVDMVNDGVEDLR	10	P09211		2849.4	5.09204	4.76406	5.65424	5.82972	5.12226	5.2595	1
QVLDLEDLVFTQGSHFMANKR	9	O75643		2448.22	5.08667	4.94253	3.86358	3.27327	4.20472	4.97801	1
KCAGCTNPISGLGGTKYISFEER	10	Q14192	C2(Carbamidomethyl); C5(Carbamidomethyl)	2545.2	5.08643	4.73343	4.92991	4.92456	5.11351	5.04211	2
TEADAEKTFEEKQGTEIDGR	21	P19338		2254.05	5.0859	5.33574	5.06103	4.79422	4.93182	5.30539	2
VFIGNLNTLVVKKSDVEAIFSK	19	P07910;B2RXH8		2421.38	5.08581	5.80727	5.57904	5.04628	5.45716	4.85748	2
ITAFVPNDGCLNFIEENDEVLVAGFGR	13	P62266	C10(Carbamidomethyl)	2996.44	5.08562		4.59874	2.80126	3.29666		0
IEKQYDADLEQILIQWITTQCR	6	P37802	C21(Carbamidomethyl)	2764.39	5.08473	4.36426	4.01799	4.71196	4.29823	4.56492	1
VGKDELFALEQSCAQVVLQAANER	6	Q16658	C13(Carbamidomethyl)	2675.34	5.08316	4.96442	5.02763	4.4238	4.58686	4.94582	1
IINEPTAAAIAYGLDKKVGAER	38	P11142		2300.26	5.07938	5.20159	4.93422	5.26647	5.58721	5.00788	2
GFGFVCFSSPEEATKAVTEMNGR	7	P11940;Q13310	C6(Carbamidomethyl)	2521.14	5.07861	4.98142	4.34005	4.97755	4.89094	4.28246	1
ALMLQGVDLLADAVAVTMGPKGR	21	P10809	M18(Oxidation)	2342.26	5.07848	5.70978	5.32304	5.11466	5.82999	5.17367	1
KYTLPPGVDPTQVSSSLSPEGTLTVEAPMPK	24	P04792	M29(Oxidation)	3242.64	5.07806	4.5049	4.84838	5.46194		3.92475	1
VLQAQGSSDPEEESVLYSNR	26	Q15785		2208.04	5.07322	3.96684	5.18287	4.53514	4.28926	4.22606	0
HIADLAGNSEVILPVPAFNVINGGSHAGNK	22	P06733		3011.58	5.06997	4.17127	5.83627	5.29843	5.27787	4.20905	0
SNVSDAVAQSTRIIYGGSVTGATCK	7	P60174	C24(Carbamidomethyl)	2542.27	5.06891	4.88317	5.55867	5.46552	5.9654	6.19843	1
DLMACAQTGSGKTAAFLLPILSQIYSDGPGEALR	6	O00571	C5(Carbamidomethyl)	3551.78	5.06799		6.02027	5.02358	5.5891		1
VVANSKESYELRYFQINQDEEEEEDED	17	P35268		3307.44	5.06718	5.11263	5.18641	5.72827	5.37603	6.18081	2
GGNFGGRSSGPYGGGGQYFAKPR	15	P09651		2274.1	5.06716	4.87919	5.47107	4.35693	3.76585	4.50896	1
LAADGRGLQTVHINENFAK	7	Q13573		2054.07	5.06583	3.19703	3.64564	3.5186	3.52181	3.70333	1
EGDLLFTVAKDPIVNVWYSVNGER	3	Q13347		2721.38	5.06538		4.74618	5.46233			1
IKAAQYQVNQAAAAQAAATAAAMTQSAVK	8	Q9NR56		2847.48	5.06513	4.82104	5.24186	5.52045	5.13051	4.86585	1
ADKDYHFKVDNDENEHQLSLR	9	P06748		2573.2	5.06492	4.44381	3.3252	4.14134	4.54543	4.2203	2
VVVSNRLVTSPCCIVTSTYGWTANMER	22	P07900	C12(Carbamidomethyl); C13(Carbamidomethyl)	3100.49	5.06489	4.22863	5.09832	4.66297	4.56544	5.01327	1
SGETEDTFIADLVVGLCTGQIK	164	P09104;P06733;P13929	C17(Carbamidomethyl)	2353.16	5.06447	3.68628	5.28569	4.82217	5.42773	4.55774	0
ERLEQQVPVNQVFGQDEMIDVIGVTK	7	P39023		2971.53	5.06331	5.06928	4.88764	5.1017	4.43649	5.66487	1
CNNVLYIRGVEEEEEDGEMRE	8	P62306	C1(Carbamidomethyl)	2570.11	5.06286	4.19081	4.4818	5.21603	4.33361	4.00258	2
NGDFLPTRLQAQQDAVNIVCHSK	22	P55036	C20(Carbamidomethyl)	2611.3	5.06096	4.53278	3.96099	4.71738	4.35155	4.3144	1
FGVAPDHPEVKNVINTFTQTAHSGR	7	P22570		2722.37	5.05734	4.09052	4.26886	3.85291	3.15123	5.4411	1
CTGGEVGATSALAPKIGPLGLSPK	21	P30050	C1(Carbamidomethyl)	2281.22	5.05585	4.21649	4.51068	5.29382	3.95964	4.86919	1
KHPDADSLYVEEVDVGEIAPR	33	Q12904		2339.15	5.05573	5.28154	4.34029	4.37938	4.62172	4.89028	1
KLVKEVIAVSCGPAQCQETIR	10	P38117	C11(Carbamidomethyl); C16(Carbamidomethyl)	2386.25	5.05467	4.25656	4.32107	4.39453	4.35716	6.09211	2
INKTSPVTASDPAGPSYAAATLQASSAASSASPVSR	19	P18887		3418.71	5.05211	4.69151	5.08865	4.4475	4.96249	5.51444	1
SVSDNDIRKYEMFAQTLQQSR	11	P55072		2516.22	5.05152	4.6878	4.36693	4.55812	4.81885	3.61611	2
MDPNCSCATGGSCTCAGSCKCKECK	21	P04732	N-Term(Acetyl); C5(Carbamidomethyl); C7(Carbamidomethyl); C13(Carbamidomethyl); C15(Carbamidomethyl); C19(Carbamidomethyl); C21(Carbamidomethyl); C24(Carbamidomethyl)	2928.06	5.05133	4.97239	4.65128	4.57662	5.00288	5.66271	2
AADGPGDRFIIGESQAGEQPTQTVMPGQVMR	8	Q9NQX3		3243.55	5.04522	5.27816	4.35622	4.74484	4.22806	4.14115	1
SMKFVDGLMIHSGDPVNYYVDTAVR	6	P23396		2814.37	5.04472	4.6737	5.26606	5.62312	4.81976	5.07266	1
NLPQYVSNELLEEAFSVFGQVER	53	Q15233		2668.36	5.04356	4.85951	4.23805	3.6062	3.6926	3.61953	0
YADLTEDQLPSCESLKDTIAR	60	P18669	C12(Carbamidomethyl)	2425.16	5.0428	5.81628	5.80098	5.5034	4.8415	5.46667	1
ISYFTFIGTPVQATNMNDFKR	6	O43396		2450.21	5.04126	4.86359	4.46384	4.10414	5.11189	4.41379	1
SLYALFSQFGHVVDIVALKTMK	8	P08579		2467.34	5.04043	4.40267	5.03782	4.98723	3.62278	5.04179	1
MNEEYDVIVLGTGLTECILSGIMSVNGKK	8	P50395	N-Term(Acetyl); C17(Carbamidomethyl)	3212.57	5.04002	3.96458	3.06591	3.98961	5.1051	4.42724	1
IYITLTGVHQVPTENVQVHFTER	13	Q9HB71		2681.4	5.03995	5.53284	5.04515	4.46329	4.82341	5.34046	0
AAIISAEGDSKAAELIANSLATAGDGLIELR	9	P35232		3040.62	5.03949		6.68558	5.43264	5.99824	2.78546	1
IGEWELIQESGVPLKPLFGPGYTGIR	11	P45974		2856.52	5.03766	4.14042	4.4811	5.24766	5.58451	5.04809	0
QDLTTLDVTKLTPLSHEVISR	6	P41091		2366.3	5.03635	5.09215	4.86853	4.12561	4.6254	4.35418	1
DSQGHGRDLSAAGIGLLAAATQSLSMPASLGR	7	P43243		3108.59	5.03628		4.99574	4.91713	5.23764	5.34073	1
ATPPQIVNGDQYCGDYELFVEAVEQNTLQEFLK	20	Q9H299	C13(Carbamidomethyl)	3815.82	5.0328		5.0444	5.11502	4.32941	5.54473	0
FLEVQYLTGGLIEPDTPGRVPLDEALQR	11	Q15149		3126.66	5.03216	5.03091	4.51516	4.54125	4.74613	4.43397	1
SLEGDLEDLKDQIAQLEASLAAAKK	7	P20700		2656.41	5.03066	4.41035	6.0799	4.00602	5.58245	4.24115	2
NLDFQDVLDKLADMGIAIR	36	Q9Y3I0		2147.11	5.03046	4.34097	4.244	4.49614	4.71143	4.70778	1
LLEGEEQRLCEGIGAVNVCVSSSR	15	Q14533	C10(Carbamidomethyl); C19(Carbamidomethyl)	2662.3	5.02844	4.01251	4.64927	4.70296	4.78697	3.62833	1
TIEELQNKILTATVDNANILLQIDNAR	3	Q04695		3023.63	5.02654		4.89528				1
IMLKGDNITLLQSVSN	24	P62304		1745.95	5.02372	4.6318	4.75649	4.9239	4.74473	4.62057	1
GVPESLASGEGAGAGLPALDLAK	16	O95865		2080.09	5.02237	3.84786	4.1166	4.17103	4.36556	4.77837	0
VDKGVVPLAGTNGETTTQGLDGLSER	11	P04075		2614.33	5.02147	5.05741	4.58149	6.046	4.90059	5.11768	1
VLCELADLQDKEVGDGTTSVVIIAAELLK	5	P17987	C3(Carbamidomethyl)	3099.64	5.0212		4.89485	5.03155	6.0198	6.13359	1
AMTGVEQWPYRAVAQALEVIPR	10	P49368		2485.3	5.01996		4.69033	3.84225	4.41097	1.81823	1
KYDAFLASESLIKQIPR	28	P62906		1979.09	5.01835	5.46492	5.37052	4.73811	4.84217	5.06116	2
LQEDKEQMAQQLAEETQGFQR	8	Q15149		2507.17	5.01774	4.60918	4.5478	5.46838	5.73154	5.39401	1
LLQEALEAEERGGTPAFLPSSLSPQSSLPASR	8	Q96JY6		3338.72	5.01589	4.95709	4.59069	4.60342	4.17549	4.64012	1
LIGDAAKNQVAMNPTNTVFDAK	8	P11142	M12(Oxidation)	2334.17	5.01504	4.52446	3.77221	4.2872		4.79691	1
VDCTANTNTCNKYGVSGYPTLK	23	P30101	C3(Carbamidomethyl); C10(Carbamidomethyl)	2463.12	5.0134	4.96422	5.24915	5.09977	4.83244	5.18919	1
SAINEVVTREYTINIHKR	14	P62899		2143.16	5.01258	4.09031	5.69661	4.87986	4.577	4.24243	2
NATNVEQSFMTMAAEIKKR	7	P62820		2169.07	5.01211	4.48868	4.11648	4.73084	4.26083	4.20596	2
YGGPPPDSVYSGQQPSVGTEIFVGKIPR	20	O60506		2932.49	5.00923	5.40379	4.35589	4.91575	4.56774	5.82871	1
SFSERFPEDGPELEEILTQLATADAR	3	Q9NY33		2921.41	5.00898		6.04302	3.88451			1
ADHQPLTEASYVNLPTIALCNTDSPLR	33	P08865	C20(Carbamidomethyl)	2996.48	5.0072	5.56745	5.62043	5.35174	5.56093	5.59405	0
SGNFGGSRNMGGPYGGGNYGPGGSGGSGGYGGR	8	P22626		2952.24	5.00648	5.00939	5.18863	4.98713	6.63081	4.962	1
YMNSGPVVAMVWEGLNVVKTGR	30	O60361;P22392		2407.22	5.0007	4.45903	5.31554	5.17306	5.73875	4.73879	1
IGAEVYHNLKNVIKEK	38	P06733		1855.04	4.99486	4.65629	4.66506	4.69604	4.8706	4.62476	2
VDEFPLCGHMVSDEYEQLSSEALEAAR	30	P27635	C7(Carbamidomethyl)	3082.38	4.99462	6.14458	5.60567	5.73065	5.69947	5.30624	0
MDPNCSCAAGDSCTCAGSCK	73	P02795	N-Term(Acetyl); C5(Carbamidomethyl); C7(Carbamidomethyl); C13(Carbamidomethyl); C15(Carbamidomethyl); C19(Carbamidomethyl)	2250.76	4.9926	4.82456	4.61456	4.76574	5.0086	5.27711	0
IMEGPAFNFLDAPAVRVTGADVPMPYAK	5	P11177		2977.5	4.98953	4.00278	4.2803	4.28591	4.03674		1
NICKVVEVGSKIYVDDGLISLQVK	8	P14618	C3(Carbamidomethyl)	2676.46	4.98677	3.67291		4.44323	4.7141		2
VFLENVIRDAVTYTEHAK	73	P62805		2105.1	4.9832	4.98469	5.04067	4.74095	4.86718	4.87185	1
MLVELSKAQDIEAGDGTTSVVIIAGSLLDSCTK	2	P50991	C31(Carbamidomethyl)	3421.76	4.983		4.13791				1
LLLAAKALSTDPAAPNLKSQLAAAAR	9	Q9Y490		2575.49	4.98291	5.53908	4.95944		4.48678	4.34294	2
HQGVMVGMGQKDSYVGDEAQSKR	35	P68133;P68032;P60709;P63261	M8(Oxidation)	2523.17	4.98023	4.51362	5.47342	5.04939	4.82436	5.24767	2
IKEDEDDKTVLDLAVVLFETATLR	18	P14625		2733.45	4.97889	6.69906	5.41782	6.01412	5.06276	6.26399	2
LLEQKVELAQLQEEWNEHNAK	9	Q9H307		2549.29	4.97706	5.25755	4.80524	5.37644	4.96258	4.84395	1
YLSEVASGDNKQTTVSNSQQAYQEAFEISK	13	P31946		3322.56	4.97691	5.85278	5.93312	5.67716	4.95148	6.05041	1
NSNLVGAAHEELQQSR	38	P02545		1752.86	4.97496	4.85129	4.09425	4.04499	4.50011	4.03239	0
CAQGCICKGTSDKCSCCA	22	P80297	C1(Carbamidomethyl); C5(Carbamidomethyl); C7(Carbamidomethyl); C14(Carbamidomethyl); C16(Carbamidomethyl); C17(Carbamidomethyl)	2122.79	4.97492	5.44035	4.81166	5.83927	5.78748	6.14618	2
VLGPAACRNPDIFTEVANCCIR	7	Q7Z6Z7	C7(Carbamidomethyl); C19(Carbamidomethyl); C20(Carbamidomethyl)	2533.21	4.97369	4.38939	4.2937	5.01625	4.18366	4.05448	1
IQKLLQDFFNGKELNK	23	P11142		1935.06	4.9732	4.41618	4.69765	4.94015	4.39884	4.23963	2
TVLGTPEVLLGALPGAGGTQRLPK	17	P40939		2345.35	4.97219	3.40291	5.07782	4.46391	5.1699	3.96579	1
SFIKDYPVVSIEDPFDQDDWGAWQK	12	P06733		2985.39	4.97042	6.35738	4.64185	4.57745	5.64833	4.31911	1
IKVNGKAGNLGGGVVTIER	26	P35268		1882.08	4.96976	4.65404	4.45375	4.35702	4.14652	5.00595	2
AGELTEDEVERVITIMQNPR	29	P62269		2300.15	4.96832	5.26066	4.85283	4.98475	5.17062	4.69654	1
ADIEVACYGYEGIDAVKEALR	7	P05198	C7(Carbamidomethyl)	2342.12	4.96773	3.82911	3.85052	4.20791			1
GADKTVKGPDGLTAFEATDNQAIK	6	P58546		2447.24	4.9659	5.5151	4.70648	6.48876	5.97975	4.96266	2
QNFTEPTAIQAQGWPVALSGLDMVGVAQTGSGK	10	P17844		3358.66	4.9658		5.12079	1.59608	1.53429		0
QQSHFAMMHGGTGFAGIDSSSPEVK	9	Q15365		2606.18	4.96509	4.83083	4.0875	5.13887	4.02182	4.00599	0
LMVELSKSQDDEIGDGTTGVVVLAGALLEEAEQLLDR	10	P48643		3914.05	4.96489	4.31241		5.4243	4.83258	4.43527	1
LEVAPISDIIAIKSPDTFVR	33	P13804		2184.23	4.96438	5.19914	4.67455	4.83947	4.71104	4.6712	1
SAAETVTKGGIMLPEKSQGK	31	P61604		2032.07	4.96322	5.12574	5.22164	4.98661	5.03816	4.95586	2
TFNTSTGGLLLPSDTKRSQIYGSR	6	P12956		2599.34	4.96084	4.44262	3.88235	4.54569	3.61338	4.17497	2
RQVLLSAAEAAEVILRVDNIIK	9	P78371		2421.41	4.9557	4.13893	4.4745	4.5734	5.1162	2.87362	2
RGHVFEESQVAGTPMFVVK	29	P13639		2118.07	4.9538	4.60248	4.84758	4.40661	4.50436	3.97424	1
KTFSHELSDFGLESTAGEIPVVAIR	13	P30101		2703.39	4.95264	5.18847	5.00095	5.35025	4.82334	5.44987	1
KGLIAAICAGPTALLAHEIGFGSK	8	Q99497	C8(Carbamidomethyl)	2395.31	4.95132	6.24688	4.84417	6.18091	4.59118	5.73681	1
MLLAHVDLIEKLLNYAPLEK	9	P62875		2323.3	4.94706	5.25358	4.99191	5.56631	5.10332	3.97699	1
GRVFEVSLADLQNDEVAFRK	7	P61247		2293.19	4.94666	3.8919	4.80988	4.33351	4.97187	4.78089	2
RDTVEVALEDKGDSTFR	7	Q14315		1937.95	4.94637	4.1691	3.89522	3.14515	3.79771	4.84495	2
VKADRDESSPYAAMLAAQDVAQR	10	P62263		2492.23	4.94607	3.85828	4.51353	4.95002	4.76606	4.8072	2
YASICQQNGIVPIVEPEILPDGDHDLKR	15	P09972;P04075	C5(Carbamidomethyl)	3176.61	4.94572	4.96227	5.84124	5.70096	5.83038	5.41575	1
ALSTGEKGFGYKGSCFHR	58	P62937	C15(Carbamidomethyl)	2001.96	4.94563	4.35354	4.3567	5.08951	4.17899	4.7364	2
SAGVQCFGPTAEAAQLESSKR	30	P22102	C6(Carbamidomethyl)	2194.06	4.94541	4.69607	5.27593	5.44282	4.78505	5.12199	1
AKQIVWNGPVGVFEWEAFAR	46	P00558		2304.19	4.94462	4.61121	3.85497	5.09927	4.34644	4.83911	1
TIGVAAKNQQITHANNTVSNFKR	8	Q92598		2512.34	4.94381	5.176		5.14314		3.16976	2
NIDNPALADIYTEHAHQVVVAK	9	O75083		2418.23	4.94274	4.11387	4.39941	4.93231	3.88989	5.046	0
GLVAVITGGASGLGLATAER	14	Q99714		1813.01	4.94139	4.65098	4.7792	4.62438	4.39761	4.33371	0
KLGEMWNNTAADDKQPYEK	26	P09429		2238.04	4.93829	4.21273	5.67315	4.54225	3.97146	3.80018	2
CPSIAAAIAAVNALHGR	10	Q14498	C1(Carbamidomethyl)	1691.89	4.9318	4.00381	4.45474	4.82255	4.5894	3.53974	0
MKSSSSVTTSETQPCTPSSSDYSDLQR	16	P50552	C15(Carbamidomethyl)	2966.29	4.93171	3.60098	5.26091	3.91301	4.27486	3.30785	1
NALLSLAKGDRSEDFGVNEDLADSDAR	19	P04083		2878.38	4.9303	3.95156	4.34171	4.84441	4.51364	4.10117	2
SSGSPYGGGYGSGGGSGGYGSR	49	P51991		1910.78	4.92638	4.99871	5.33911	5.13863	5.24742	5.05082	0
LTGIKHELQANCYEEVKDR	11	P23528	C12(Carbamidomethyl)	2303.12	4.92425	4.35488	4.82593	5.01382	4.9627	4.12305	2
TLTAAAVSGAQPILSKLEPQIASASEYAHR	7	O60664		3080.62	4.92326	4.68493	5.8742	4.92646	4.87901	5.37608	1
CSASCCEDSQASMKQVHQCIER	12	Q96C01	C1(Carbamidomethyl); C5(Carbamidomethyl); C6(Carbamidomethyl); C19(Carbamidomethyl)	2671.1	4.92223	3.89577	4.19976	4.26925	4.40563	3.88785	1
NMLLQNPQLAYALLQAQVVMR	14	Q9H0L4;P33240		2414.32	4.92148	2.34864	4.84664	3.56708	4.35178	3.43004	0
GAGSYTIMVLFADQATPTSPIRVK	22	P21333		2523.31	4.92047	4.801	2.58582	4.80842	4.40863	4.40778	1
IGKPAPDFKATAVVDGAFKEVK	8	P32119		2288.26	4.91993	3.61376	5.66642	5.51819	5.62871	4.33785	2
IYLTADNLVLNLQDESFTRGSDSLIK	12	Q99623		2925.52	4.91966	4.02024	4.52395	4.60518	3.95608	4.10517	1
IKGDVPSVGLEGPDVDLQGPEAK	21	Q09666		2320.2	4.91964	4.77927	5.16974	5.43207	5.38155	5.49871	1
FVFSLVDAMNGKEGVVECSFVK	29	P40926	C18(Carbamidomethyl)	2462.22	4.91937	5.29011	5.12138	4.9659	5.1083	5.20491	1
AITIAGVPQSVTECVKQICLVMLETLSQSPQGR	28	Q15365	C14(Carbamidomethyl); C19(Carbamidomethyl)	3613.87	4.919	1.38234	5.49653	5.0256	5.64326	4.29218	1
LSSEMNTSTVNSAREELMESR	17	P20700		2371.09	4.91475	4.45224	4.11492	4.99116	4.02022	4.57877	1
QLTVQMMQNPQILAALQER	33	P55209		2212.16	4.91468	5.13849	4.07763	4.44677	4.84193	4.66539	0
IHQIGPGMVQQIQSVCMECQGHGER	16	P31689	C16(Carbamidomethyl); C19(Carbamidomethyl)	2879.32	4.91419	4.20274	4.22715	4.87245	4.84958	3.80865	0
GFGFVTFDDHDPVDKIVLQK	29	P22626		2277.16	4.91249	4.51588	4.87653	5.16999	4.2204	4.22495	1
GSQAQPDSPSAQLALIAASQSFLQPGGK	7	Q9Y490		2754.41	4.91218	4.46095	4.55863	4.61408	5.53304	4.72518	0
VSDKVMIPQDEYPEINFVGLLIGPR	9	Q15637		2829.5	4.91183		4.12083	4.68925	4.84783	4.01243	1
IVGPSGAAVPCKVEPGLGADNSVVR	23	P21333	C11(Carbamidomethyl)	2449.29	4.91159	5.1883	5.12927	4.73356	4.86975	4.61004	1
SSGSGAGKGAVSAEQVIAGFNRLR	11	Q9UHV9		2319.22	4.91055	3.22823	4.25365	4.60298	4.27648	3.95667	2
AGGIETIANEYSDRCTPACISFGPK	13	P34932	C15(Carbamidomethyl); C19(Carbamidomethyl)	2714.26	4.90897	4.55283	4.37109	4.96289	4.49154	4.57575	1
VEESTQVGGDPFPAVFGDFLGRER	16	Q14315		2609.26	4.9045	4.89386	4.03972	4.88309	4.48681	5.22489	1
MKLNISFPATGCQKLIEVDDER	13	P62753	C12(Carbamidomethyl)	2564.29	4.90271	4.83086	4.83437	5.23489	5.07381	5.34958	2
IVAPGKGILAADESTGSIAK	47	P04075		1898.06	4.90187	5.33984	4.93593	4.96875	5.08413	4.18888	1
SLYYYIQQDTKGDYQKALLYLCGGDD	16	P07355	C22(Carbamidomethyl)	3090.43	4.89884	5.82793	5.06237	4.77884	5.56675	5.57463	2
AAKVLEQLTGQTPVFSK	32	P62913		1817.02	4.89881	4.72822	5.07702	4.47263	4.80292	4.94864	1
GGPGSAVSPYPTFNPSSDVAALHK	14	P04083		2356.16	4.89747	6.0442	5.91358	5.22009	5.62168	4.61513	0
LMEPIYLVEIQCPEQVVGGIYGVLNRK	24	P13639	C12(Carbamidomethyl)	3117.65	4.89684	4.39317	4.98871	5.1162	4.58968	4.68628	1
DMGGYSTTTDFIKSVIGHLQTKGS	10	O43837		2543.26	4.89472	3.16997	3.50623	3.46183	3.38932	4.04197	2
ALMLQGVDLLADAVAVTMGPK	30	P10809	M18(Oxidation)	2129.13	4.89449	4.27437	4.38663	4.67385	4.19983	4.94563	0
FMQTFVLAPEGSVANKFYVHNDIFR	7	Q13283		2930.46	4.89365	3.42844	4.33371	3.63234	4.0613	4.29878	1
AKQIVWNGPVGVFEWEAFARGTK	8	P00558		2590.35	4.8932	5.14407	4.47037	4.70936	5.60617	5.02133	2
AVANETGAFFFLINGPEIMSKLAGESESNLR	6	P55072		3312.65	4.89275	3.95756	4.82263	4.89895	4.79337	3.79236	1
MEDSMDMDMSPLRPQNYLFGCELK	5	P06748	N-Term(Acetyl); C21(Carbamidomethyl)	2949.25	4.89232		4.33359		1.04044		0
TGVKGLTAVSNNAGVDNFGLGLLLR	9	P55809		2486.37	4.89009	4.93478	4.46494	3.82687	4.63149	5.08303	1
SCCSCCPVGCAKCAQGCICK	8	P80297;P02795	C2(Carbamidomethyl); C3(Carbamidomethyl); C5(Carbamidomethyl); C6(Carbamidomethyl); C10(Carbamidomethyl); C13(Carbamidomethyl); C17(Carbamidomethyl); C19(Carbamidomethyl)	2422.89	4.88897	4.54427	4.27843	5.27689	4.44929	4.57047	1
TYDATTHFETTCDDIKNIYKR	11	P50395	C12(Carbamidomethyl)	2592.2	4.88864	4.19264	4.34168	5.32575	4.14474	4.98036	2
MEPEQMLEGQTQVAENPHSEYGLTDNVER	19	Q9C005	N-Term(Acetyl)	3373.5	4.88779	4.68891	5.0068	4.55853	3.78685	4.70426	0
AGYSQGATQYTQAQQTR	18	Q96KR1		1858.87	4.88727	4.26768	3.8097	5.17	4.17578	4.99649	0
THTQDAVPLTLGQEFSGYVQQVK	9	P07954		2546.29	4.88712		5.25047	4.06839	4.6366	4.17666	0
QLIYNYPEQLFGAAGVMAIEHADFAGVER	13	P78371		3209.58	4.88701	4.16379	5.04837	4.7334	4.91815	4.4288	0
SAGLAFSLYQAMAKDQAVENILVSPVVVASSLGLVSLGGK	15	P50454		3990.13	4.88347	3.65389	5.30134	5.93436	7.14586	5.01463	1
NSFTVDCSKAGTNMMMVGVHGPK	8	Q14315	C7(Carbamidomethyl)	2468.12	4.88193	3.36715	3.45931	4.03174	4.3071	4.61017	1
MSVQPTVSLGGFEITPPVVLR	56	P06748		2227.22	4.87885	5.11231	5.20807	5.50649	5.20116	4.98469	0
MREIVHLQAGQCGNQIGAK	38	P04350;P68371;P07437;Q9BVA1;Q13885;Q13509	M1(Oxidation); C12(Carbamidomethyl)	2126.05	4.87492	4.9322	5.23041	5.08824	5.15991	5.31856	1
AGVVANDAGDRVTPAVVAYSENEEIVGLAAK	12	Q0VDF9		3085.59	4.87476	5.72749	4.90926	4.86416	4.77833	5.57969	1
ATVECVKDQFGFINYEVGDSK	7	O75534	C5(Carbamidomethyl)	2406.14	4.87381	4.35141	4.467	5.56122	5.04305	4.34071	1
KKNEELEQLYQDQEVPKPK	9	Q9NVS9		2343.23	4.8733	4.51503	3.74764	3.97167	4.26464	4.30485	2
IGGDAATTVNNSTPDFGFGGQKR	25	Q92945		2310.11	4.87321	4.37204	4.47263	5.34538	4.64369	5.16741	1
AVEHINKTIAPALVSK	74	P06733		1690.98	4.8728	4.78572	4.9658	5.0744	5.20143	5.08564	1
MDEKVFTKELDQWIEQLNECK	6	P67775	N-Term(Acetyl); C20(Carbamidomethyl)	2725.27	4.87145	3.04192	2.84556	5.32504	5.17556	4.21404	2
DCFGCLREWCDAFL	12	O75531	C2(Carbamidomethyl); C5(Carbamidomethyl); C10(Carbamidomethyl)	1848.75	4.86907	4.17405	3.67574	4.70728	4.36066	4.43251	1
NIPGITLLNVSKLNILK	52	P36578		1850.14	4.86837	4.60578	4.49136	4.30982	4.52086	4.0653	1
SAQFEHTLLVTDTGCEILTR	24	P53582	C15(Carbamidomethyl)	2291.13	4.86657	4.2342	4.80031	3.97801	4.14723	4.03094	0
AAFIKAEKENPGLTQDIIMK	7	Q9BUL8		2217.19	4.86621	4.9013	5.65804	5.9064	5.18273	6.10254	2
FMKSKPGAAMVEMADGYAVDR	11	P14866		2274.07	4.8662	4.45581	4.51781	5.06852	4.98679	4.02322	1
SMAASGNLGHTPFVDEL	12	P22695		1745.81	4.86493	4.44517	2.80307	4.48466	4.98082	4.29425	0
LPATAAEPEAAVISNGEH	17	Q01581		1776.87	4.86468	3.98391	4.11042	4.28261	4.14296	4.50859	0
VLSSCPQAGEATLLAPSTEAGGGLTCASAPQGTLR	8	O15446	C5(Carbamidomethyl); C26(Carbamidomethyl)	3428.69	4.86292	4.22122	4.35828	4.45055		4.60223	0
ATPPQIVNGDQYCGDYELFVEAVEQNTLQEFLKLA	8	Q9H299	C13(Carbamidomethyl)	3999.95	4.86205			3.77464	4.39682	3.54354	1
TCTTVAFTQVNSEDKGALAK	91	P62424	C2(Carbamidomethyl)	2141.05	4.862	4.43841	4.4756	4.43965	4.07285	4.67406	1
DGGSVVGASVFYKDVAGLDTEGSKQR	8	O60271		2642.29	4.86178	3.77135	5.06605	4.35468	5.46689	3.65748	2
DIKEKLCYVALDFEQEMATAASSSSLEK	6	P60709;P63261;Q6S8J3	C7(Carbamidomethyl)	3163.52	4.86157		4.30435	4.86597	5.40581	5.4742	2
KAHLGTALKANPFGGASHAK	8	P62266		1976.08	4.86034	5.01696	4.81098	4.80715	4.57677	5.50284	2
KTVGVEPAADGKGVVVVIK	14	P46779		1866.11	4.85994	5.11646	5.18327	5.45587	5.33492	4.83217	2
NVNIFKFIIPNVVKYSPNCK	7	P00338	C19(Carbamidomethyl)	2394.3	4.85764	3.7185	5.05421	4.81074	3.42867	3.84495	2
KAQLVVIAHDVDPIELVVFLPALCR	12	P62424	C24(Carbamidomethyl)	2815.58	4.85648	1.40632	4.67299	4.89561	4.46575	4.96723	1
AVSDASAGDYGSAIETLVTAISLIK	26	Q16630		2452.28	4.85623	3.37504	5.03194	3.92132	5.30842	4.57358	0
YAQPATATAATAAAAAAAAYSDGYGR	14	O43251		2432.16	4.85374	4.6955	4.99919	4.68109	4.16613	4.35031	0
VGTFFSEVKPAGPTVEQQGEMAR	9	P54886		2465.23	4.85322	6.09117	5.63114	5.18823	4.82226	5.6393	0
KLFIGGLSFETTDDSLREHFEK	6	P51991		2569.29	4.84813	3.92051	4.28638	3.40906	4.95228	4.27186	2
GPGLEKTGVAVNKPAEFTVDAK	16	P21333		2228.19	4.84603	4.04032	3.81957	5.60218	4.40212	4.77841	1
VNALKNLQVKCAQIEAK	8	P55209	C11(Carbamidomethyl)	1927.07	4.84548	4.76916	5.18036	3.75204	5.14365	3.553	2
QATTIIADNIIFLSDQTKEKE	36	Q04837		2378.24	4.84127	5.3231	5.23773	4.89771	4.8458	4.6983	2
KITAFVPNDGCLNFIEENDEVLVAGFGR	8	P62266	C11(Carbamidomethyl)	3124.53	4.83919	5.46378	6.10794	4.62857	4.98451	4.2403	1
VANPSGNLTETYVQDR	23	P21333		1763.85	4.8382	4.29208	4.3505	4.18541	4.11632	4.13522	0
GLDPERIIGATDSSGELMFLMK	25	Q13185		2380.18	4.83699	5.55941	5.27376	4.8587	5.38532	5.26782	1
IMQSSSEVGYDAMAGDFVNMVEKGIIDPTK	2	P10809		3232.5	4.83647		4.68408				1
LATTACTLGDGEAVGADSGTSSAVSLKNR	7	O94901	C6(Carbamidomethyl)	2809.36	4.83604	5.30078	3.28795	4.24932	4.19292	4.67909	1
ALANVNIGSLICNVGAGGPAPAAGAAPAGGPAPSTAAAPAEEK	18	P05386	C12(Carbamidomethyl)	3808.95	4.83491	7.11711	5.59166	5.99868	6.16614	5.59826	0
TAFDEAIAELDTLSEESYKDSTLIMQLLR	8	P63104		3302.65	4.83354	5.4732	2.74803	3.92741	3.07731	3.58362	1
VYNVTQHAVGIVVNKQVK	23	P46778		1996.13	4.83267	5.61774	5.74778	5.64785	5.45374	5.22574	1
VLKQVHPDTGISSK	68	P23527;O60814;Q8N257		1508.84	4.82997	4.4578	4.18926	4.02036	4.09323	4.23685	1
KQPPVSPGTALVGSQKEPSEVPTPK	24	P17096		2558.38	4.82934	4.47753	4.22882	5.87935	5.11936	4.08739	2
YQPLASTASDNDFVTPEPR	30	Q15021		2107.99	4.82825	4.14927	4.5508	4.27264	4.17097	4.72852	0
IIGLDQVAGMSETALPGAFKTR	8	P35579		2275.2	4.8278	3.39857	4.62625	4.50332	4.23839	4.08224	1
FGGEHVPNSPFQVTALAGDQPSVQPPLR	10	P21333		2945.49	4.82735	5.18034	5.53639	5.13043	4.66481	4.98509	0
EAATQAQQTLGSTIDKATGILLYGLASR	3	P47897		2877.53	4.82703		5.053	5.57347			1
HILLAVANDEELNQLLKGVTIASGGVLPR	5	Q9P0M6		3040.71	4.82538		5.69632	3.14752	3.393		1
YAICSALAASALPALVMSKGHR	9	P36578	C4(Carbamidomethyl)	2287.22	4.82066	4.165	4.20121	4.31457	4.7166	4.48177	1
CTYLVLDEADRMLDMGFEPQIR	3	Q92841	C1(Carbamidomethyl)	2672.24	4.82034		4.39016				1
QLSSGVSEIRHTADRWR	22	P04792		1998.03	4.82023	3.66581	4.3152	4.33927	3.99313	4.45057	2
AASPQDLAGGYTSSLACHR	35	P51948	C17(Carbamidomethyl)	1961.92	4.82016	3.99058	4.18751	4.11336	4.54934	4.19352	0
DLSAAGIGLLAAATQSLSMPASLGR	14	P43243		2371.26	4.82006	5.43806	5.50826	4.41281	4.99595	5.2788	0
KAHLMEIQVNGGTVAEKLDWAR	11	P39023		2466.29	4.81976	5.455	5.31772	4.52041	5.063	4.78178	2
NLPYKVTQDELKEVFEDAAEIR	31	P19338		2607.33	4.81963	6.12442	5.08069	6.44864	5.67686	5.32783	2
IMKAQALRDNSTMGYMMAK	20	P08238		2160.04	4.81886	5.22313	4.38267	4.89264	4.24916	5.22994	2
ASNGDAWVEAHGKLYSPSQIGAFVLMK	13	P38646		2876.44	4.81782	5.24185	5.64038	6.62856	4.17966	5.9164	1
MTDQEAIQDLWQWRK	52	P06748		1947.94	4.81681	4.24017	4.46761	4.45836	4.39082	4.32158	1
IATSLDGFDVASVQQQRQEQSYFVR	26	O60664		2872.42	4.81662	4.6305	4.74662	4.71127	4.51223	4.61324	1
ILQMEEEYIQQLCEDIIQLKPDVVITEK	5	P49368	C13(Carbamidomethyl)	3417.74	4.81325		4.90481	4.27175	4.36683		0
SRNITYLPAGQSVLLQLPQ	37	P35232		2098.18	4.81269	4.83522	4.40454	4.46544	4.09734	4.4227	1
SGKYDLDFKSPDDPSR	72	P06733		1826.85	4.81195	4.62492	4.54051	4.44862	4.27341	4.12256	2
IINEPTAAAIAYGLDKK	39	P11142		1787.99	4.81148	5.08527	4.4366	4.57258	4.67023	4.54486	1
CSQAVYAAEKVIGAGKSWHK	15	P21291	C1(Carbamidomethyl)	2190.11	4.81085	4.42472	4.31176	4.76713	4.53918	4.34444	2
TAAANAAAGAAENAFRAP	15	O14828		1644.8	4.8104	4.2895	4.47327	4.22739	4.23889	4.88847	1
AMGIMNSFVNDIFERIAGEASR	18	P23527;O60814	M5(Oxidation)	2444.17	4.80837	4.0266	4.74282	4.91249	4.71022	4.29589	1
LEGLGSSEADQDGLASTVR	15	Q07065		1904.92	4.80692	4.44188	4.29054	5.04816	4.88399	4.7021	0
NLDSTTVAVHGEEIYCK	22	P21291	C16(Carbamidomethyl)	1935.91	4.80606	4.23172	4.7164	4.44779	3.89509	4.885	0
FQSSAVMALQEASEAYLVGLFEDTNLCAIHAKR	23	Q71DI3	C27(Carbamidomethyl)	3669.85	4.80496	3.86787	4.51724	4.7914	4.08561	4.09765	1
QRPGASTDSSTQGANLPDFELLSR	10	Q9UPT8		2547.25	4.80336	4.66277	4.2397	4.35595	4.35203	4.48783	0
MIIYRDLISHDEMFSDIYK	7	P13693		2389.15	4.80273	4.72219	5.41304	5.9018	4.8381	5.22736	1
NLDYVATSIHEAVTKIQ	7	P17174		1902	4.80067	4.34889	3.70837	4.11412	3.94516	5.05126	1
TTYLVLDEADRMLDMGFEPQIR	6	P17844		2613.27	4.80042		4.30936	5.10869			1
GHLDNISNNLLIGAINIENGKANSVR	10	Q99798		2746.46	4.79956	2.77364	5.18721	4.48241	5.1882	2.21479	1
SLDLDISKTNVNGGAIALGHPLGGSGSR	11	P42765		2706.39	4.79913	5.35024	5.62904	5.4204	4.97866	5.24484	1
TAENATSGETLEENEAGD	27	Q9UQ80		1837.75	4.7989	4.42082	4.72787	5.19411	4.94048	5.28912	0
STAISLFYELSENDLNFIKQSK	13	P13639		2547.3	4.79674	2.75838	3.85903	4.5851	2.2255	3.96306	1
KVVGDVAYDEAKER	23	P11586		1578.81	4.79643	3.9402	4.04838	4.25647	3.59293	3.67958	2
VCNPIITKLYQSAGGMPGGMPGGFPGGGAPPSGGASSGPTIEEVD	49	P11142	C2(Carbamidomethyl)	4272.03	4.79621	3.92042	4.35567	3.68709	4.36699	3.91417	1
SKFGANAILGVSLAVCKAGAVEK	10	P06733	C16(Carbamidomethyl)	2290.24	4.79575	5.10545	5.55015	5.1218	5.20698	4.6442	2
FSSDASKVVTRGPGLSQAFVGQK	13	Q14315		2366.25	4.79373	3.90569	3.83346	4.79645	3.36702	4.72891	2
SGGTEGLLAEKLEALITQTR	11	Q9UHB9		2087.13	4.79186	4.58656	3.91306	3.82387	3.17251	3.62941	1
CDMRENLWLNLTDGSILCGR	8	P45974	C1(Carbamidomethyl); C18(Carbamidomethyl)	2423.12	4.79107	4.37715	4.0024	3.84317	3.7764	4.54918	1
GALVLGYEGWLAGYQMNFETAK	12	P21796		2418.18	4.79024	3.28447	4.09883	4.59103	4.84144	4.50551	0
IMVSRSEIDMNDIKAFYQK	9	P04083		2288.14	4.79017	4.29113	3.66743	4.07803	5.02774	4.34463	2
TSGRVAVEEVDEEGKFVR	7	P02545		2007.01	4.78634	4.14348	4.0818	4.54362	4.21343	4.34576	2
MDSTANEVEAVKVHSFPTLK	22	P07237		2203.1	4.78529	3.84436	4.4835	4.31848	4.37259	3.75815	1
IVGYFVSGCDPSIMGIGPVPAISGALKK	7	P42765	C9(Carbamidomethyl)	2833.52	4.78487	5.47392	4.34175	4.43057	5.01112	4.30174	1
KLVQTTYECLMQAIDAVKPGVR	8	P53582	C9(Carbamidomethyl)	2520.34	4.78398	4.73292	4.0817	3.94454		4.64671	1
TIGTGLVTNTLAMTEEEKNIKWG	18	P49411		2506.28	4.78342	5.79198	5.62874	5.58277	5.81477	5.79396	2
SLHDALCVLAQTVKDSR	13	P78371	C7(Carbamidomethyl)	1912.99	4.78292	4.87229	4.34487	4.4995	4.5974	4.89485	1
EAEAAIYHLQLFEELRR	49	P14618		2088.09	4.78017	4.70198	4.80337	4.55004	4.76424	4.92983	1
KTVTAMDVVYALKR	56	P62805		1594.89	4.77999	4.71846	4.20952	4.40121	4.38005	4.8919	2
GLFIIDDKGILRQITVNDLPVGR	30	Q06830		2552.46	4.77856	4.33166	5.08808	5.14721	4.59422	4.47533	2
TQGNVFATDAILATLMSCTR	10	O15371	C18(Carbamidomethyl)	2170.06	4.7781		3.8782	3.52949		3.81971	0
EGGQYGLVAACAAGGQGHAMIVEAYPK	10	P55084	C11(Carbamidomethyl)	2705.26	4.7749	3.98884	5.03504	5.46168	4.39201	4.74979	0
HQILEQAVEDYAETVHQLSK	9	Q01082		2338.17	4.77399	5.05881	4.90338	5.28176	5.22601	4.00744	0
ASCLYGQLPKFQDGDLTLYQSNTILR	9	P09211	C3(Carbamidomethyl)	3001.52	4.7729	4.54239	4.60056	5.10261	4.11592	4.90728	1
SVIEQGGIQTVDQLIKELPELLQR	18	Q8WUM4		2706.52	4.77247	4.59053	4.67097	4.21837	4.30511	3.77942	1
IVGCSVHKGFAFVQYVNER	37	P07910	C4(Carbamidomethyl)	2210.11	4.77144	5.1427	5.64459	5.38078	4.79045	5.1885	1
MLPTIIADNAGYDSADLVAQLR	32	P78371		2347.2	4.77107	4.07575	4.77413	4.95298	5.03844	4.27187	0
MAVTFIGNSTAIQELFKR	38	P07437		2026.07	4.76604	5.42048	4.78856	4.8522	5.01284	4.85711	1
MDPNCSCATGGSCTCAGSCK	34	P04732	N-Term(Acetyl); C5(Carbamidomethyl); C7(Carbamidomethyl); C13(Carbamidomethyl); C15(Carbamidomethyl); C19(Carbamidomethyl)	2222.76	4.76586	4.41232	4.28662	4.60021	4.69269	4.99712	0
LYQTDPSGTYHAWKANAIGR	15	O14818		2249.11	4.7641	3.98503	4.45242	3.67894	3.74339	3.3556	1
TVITEEFKVPDKMVGFIIGR	9	Q96I24		2279.23	4.76369	3.67593	3.27812	4.07753	3.8933	2.75209	2
AQVVSNLKGISMSSSKLLLAAK	10	Q9Y490		2245.3	4.76317	4.69319	4.41764	4.48439	4.63017	4.08363	2
NKQTYSTEPNNLKAR	45	P46779		1763.9	4.75987	4.27971	4.57266	4.43545	4.61621	4.5233	2
SSQTSGTNEQSSAIVSAR	17	O60763		1809.86	4.75981	4.41144	4.11851	4.48433	4.32452	4.69181	0
VLQTEQAVKEYNALVAQGVR	8	Q9H7C9		2216.2	4.75902	4.65846	3.83195	4.13061	4.72239	4.24649	1
IGEEQSAEDAEDGPPELLFIHGGHTAK	15	Q16576		2847.32	4.7585	4.11952	4.90097	3.99774	4.18047	4.67959	0
LVREIAQDFKTDLR	78	P68431;Q71DI3;P84243		1703.95	4.75703	4.86539	4.43629	5.0375	4.68778	4.82459	2
EKANGTTVHVGIHPSKVVITR	9	P61254;Q9UNX3		2243.25	4.75568	4.27585	3.91896	3.29808	5.13234	4.71044	2
IIEVAPQVATQNVNPTPGATS	26	P49903		2107.11	4.75495	3.86534	4.30481	3.73561	3.22759	4.10224	0
QPYAVSELAGHQTSAESWGTGR	21	P36578		2332.09	4.75416	3.93547	4.08477	4.14477	4.49353	4.29768	0
IEIESFYEGEDFSETLTR	46	P11021		2164.99	4.75406	5.31022	5.29573	5.31391	5.0816	4.84543	0
FTGIKTAILVGGMSTQKQQR	9	Q9GZR7		2164.19	4.75071	3.66737	2.68989	3.5813	3.79574	2.91817	2
MFQAAGAAQATPSHDAKGGGSSTVQR	10	Q9BT23	N-Term(Acetyl)	2573.22	4.74835	5.07468	4.28569	4.45001	4.10434	4.35493	1
ATFLKLAGPQLVQMFIGDGAK	11	P17980		2205.2	4.74798	3.56529	3.87659	4.93337	4.21223	4.25926	1
GLDVEDVKFVINYDYPNSSEDYIHR	10	P17844		2987.4	4.74701	5.57447	5.4975	5.21549	6.25766	4.51944	1
HVVFGKVKEGMNIVEAMER	15	P62937		2173.13	4.74461	5.15255	4.17085	5.14037	4.98402	4.51321	2
LFSVPDFVGDACKAIASR	1	Q14764	C12(Carbamidomethyl)	1953	4.74289						1
IALALTAISLGTARPPPSMSAAGLAAR	7	Q9UQ35		2577.46	4.74201	4.49696	4.10295	5.43135	4.26923	4.41343	0
IAQLEEELEEEQGNTELINDRLK	37	P35579		2713.35	4.74086	5.13112	5.27218	4.74511	5.75976	5.09178	1
TGVAVNKPAEFTVDAK	33	P21333		1646.87	4.73898	3.78951	3.53272	4.33922	3.71868	4.13223	0
KLASLTPGFSGADVANVCNEAALIAAR	7	Q9Y4W6	C18(Carbamidomethyl)	2716.42	4.73752	5.6848	4.30589	4.12047	5.26826	4.95746	1
LGGSLADSYLDEGFLLDKK	14	P78371		2041.06	4.73672	4.88777	3.80951	4.5192	4.6216	3.81289	1
DLYEDELVPLFEKAGPIWDLR	4	O43390		2518.29	4.7362		4.90453	4.54511		4.64266	1
VVIIGAGKPAAVVLQTKGSPESR	7	Q14697		2277.32	4.7328	4.75394	4.57007	5.26243	5.12838	5.49292	1
DAGEGLLAVQITDQEGKPK	12	O75369		1969.02	4.73225	4.65728	4.00928	3.95475	4.49236	4.37916	0
VLYLGAASGTTVSHVSDIVGPDGLVYAVEFSHR	13	P22087		3416.72	4.72958	3.46056	4.11581	3.68581	5.06322	3.65846	0
QSAERNSNLVGAAHEELQQSR	31	P02545		2324.13	4.72751	4.98198	4.94554	5.16812	5.09066	5.39556	1
TAADYKILGGSVLHLVLALR	12	Q15843		2110.24	4.72742	3.16376	2.94724	3.06462	3.87526	2.6799	1
AGGVGGLRVPAPVTMDSFFFGCELSGHTR	11	O75607	C22(Carbamidomethyl)	3022.45	4.72643	2.69139	5.20127	5.0253		2.8332	1
LQETLSAADRCGAALAGHQLIR	10	P78527	C11(Carbamidomethyl)	2351.21	4.72545	4.26705	4.26157	4.34348	5.18022	3.99654	1
FAANPNQNKNVALLSQLYHSPAR	8	Q15717		2553.33	4.72523	5.06279	4.20138	4.42366	5.17599	4.43345	1
SSAQLSDGNVGSGATGSRPEGLAAVDIGSER	6	O15231		2945.43	4.72512		4.99012	4.6476		4.21375	0
NIKSHLGNVHDQDN	21	Q8WW12		1590.77	4.72427	4.40711	4.55185	4.46491	3.71302	4.31556	1
LLSELDQQSTEMPRTGNGPMSVCGRC	8	O95793	C23(Carbamidomethyl); C26(Carbamidomethyl)	2923.32	4.72345	4.82065	4.20856	5.11663	4.83478	4.6923	2
IMQSSSEVGYDAMAGDFVNMVEKGIIDPTKVVR	21	P10809		3586.78	4.72333	2.35718	4.71634	3.67769	5.11549	3.52259	2
DAGEGLLAVQITDPEGKPK	14	P21333		1938.02	4.72308	4.20513	4.13628	4.14318	3.95546	4.63079	0
LAGASPATVAAAAAAGSGPKDPMAR	14	Q13045		2209.12	4.72251	3.99212	3.85845	3.88263	4.01732	4.98589	1
TAWLDGKHVVFGKVLEGMEVVR	7	P23284		2470.33	4.72199	4.38577	4.40115	4.67976	4.13229	4.70181	2
VAQAFREGENTQVAEPEACDQMYESLAR	14	Q9BRT2	C19(Carbamidomethyl)	3199.45	4.72198	4.64711	4.83633	3.88278	4.86894	3.37943	1
AHATTSNTVSKLLEKVR	8	Q6NZI2		1855.04	4.72161	3.1732	3.29946	3.6576	3.67266	3.17162	2
VQGPKGLVEPVDVVDNADGTQTVNYVPSR	9	P21333		3053.55	4.72159	4.64726	5.32758	4.85597	4.7667	4.59214	1
HVGPGVLSMANAGPNTNGSQFFICTIK	8	P30405	C24(Carbamidomethyl)	2817.37	4.72112	5.38712	4.43782	6.58708	5.74133	5.17097	0
TLAEINANRADAEEEAATRIPA	13	Q13409		2326.16	4.72075	4.58749	4.26394	4.10646			2
AQAYQTGKDISTNYYASQKK	9	P14625		2265.09	4.71929	3.61608	3.673	4.33643	4.54646	3.85047	2
AMGIMNSFVNDIFER	112	P23527;O60814;Q8N257		1743.82	4.71857	4.627	4.54896	4.47577	4.70505	4.71013	0
SLALMYESEKVGVASSEELAR	12	O95721		2269.13	4.71746	3.68913	3.57494	3.65408	4.03248	3.70286	1
GGLGGGYGGASGMGGITAVTVNQSLLSPLVLEVDPNIQAVR	7	P05787		3925.05	4.71666		5.44396	5.46268	4.3327		0
VAAIEALNDGELQKAIDLFTDAIKLNPR	6	P50502		3038.65	4.7152	4.23928	5.1936	6.71037	5.90591	4.52261	2
ILTEAEIDAHLVALAERD	51	P60900		1979.03	4.71505	4.04133	3.92938	4.56524	3.65012	4.27527	1
MAPTPIPTRSPSDSSTASTPVAEQIER	14	Q16643		2826.4	4.7147	4.67632	4.45872	5.22632	4.50783	4.16725	1
VAFITGGGTGLGKGMTTLLSSLGAQCVIASR	6	Q16698	C26(Carbamidomethyl)	3023.61	4.71352	6.65271	6.00006	4.7522	4.64184	5.41744	1
GISAGAVQTAGKKGPQSLFNAPR	15	P46087		2255.24	4.71261	4.71318	5.71637	4.57611	4.41288	4.69507	2
MATEVAADALGEEWKGYVVR	29	P62753	M1(Oxidation)	2211.08	4.71195	5.04668	4.25126	5.33607	4.35786	5.24805	1
TLKIPAMTIAKNAGVEGSLIVEK	42	P10809		2383.35	4.71119	4.00434	5.12858	5.0224	4.309	4.78684	2
VSLDVNHFAPDELTVKTK	15	P04792		2013.09	4.70959	3.8321	3.80558	4.2337	4.80039	4.57692	1
LKAEAELLQQQKELAQEQAR	13	Q15149		2324.25	4.70917	3.81913	5.37085	4.82808	5.28104	4.91205	2
SGASGPENFQVGSMPPAQQQITSGQMHR	15	Q9Y490		2927.34	4.7088	4.2215	3.36581	4.75847	4.93942	4.87327	0
AHSSMVGVNLPQKAGGFLMKK	11	P00558		2200.17	4.70628	5.07504	4.19634	5.11798	4.02023	5.04692	2
KASGPPVSELITK	41	P10412;P16403		1326.76	4.70229	4.31739	4.37273	4.48863	4.38229	3.94476	1
VFEVSLADLQNDEVAFRK	35	P61247		2080.07	4.70055	4.55136	4.37806	4.56206	4.40996	4.14697	1
LTGMAFRVPTANVSVVDLTCR	13	P04406	C20(Carbamidomethyl)	2307.19	4.70044	5.41507	4.97353	5.35169	4.56012	4.94404	1
FVDGLMIHSGDPVNYYVDTAVR	19	P23396		2468.19	4.69746	4.97229	4.43104	4.86813	4.96605	3.88024	0
LGLKSLVSKGTLVQTK	110	P10412;P16403;Q02539		1672.03	4.69691	4.95812	4.2662	4.08397	4.52695	4.80383	2
ASEDLKTHMVVANTMEDFQK	9	P07814		2294.08	4.69628	5.53763	4.33118	4.96739	4.42011	4.78625	1
AGIKVTVAGLAGKDPVQCSR	39	Q99497	C18(Carbamidomethyl)	2027.1	4.69326	4.84597	4.47802	4.99727	4.89317	3.35718	2
MDPLRAQQLAAELEVEMMADMYNR	7	P62072	N-Term(Acetyl)	2867.31	4.69324	4.40604	4.51265	4.46865	4.02201	4.12937	1
KVESLQEEIAFLK	13	P08670		1533.85	4.69194	4.60824	3.9913	4.97419	4.3219	4.02094	1
HLYLRGGAGVGSMTK	26	P39019		1546.81	4.68877	4.27555	5.05375	4.57734	4.5114	3.99442	1
ALVILAKGAEEMETVIPVDVMRR	14	Q99497		2540.4	4.68845	5.25529	4.51536	4.91431	4.2978	5.37042	2
EFTESQLQEGKHVIGLQMGSNR	19	Q01995		2488.23	4.68734	5.21579	3.97625	4.90542	3.93485	3.10717	1
GWLKSNVSDAVAQSTR	35	P60174		1718.88	4.68637	4.59591	4.40811	4.61746	4.12201	4.4099	1
[truncated: 21,212 more rows]

## Sheet: Statistics
Gene	log2FC	AveExpr	t	P.Value	adj.P.Val	B
[truncated: 1,183 more rows]
